# Supplementary material for: The mycoparasite Pythium oligandrum induces legume pathogen resistance and shapes rhizosphere microbiota without impacting mutualistic interactions
Source: Front Plant Sci. 2023 Oct 20;14:1156733. doi: 10.3389/fpls.2023.1156733 (PMC10625430; doi:10.3389/fpls.2023.1156733)
Supplement: Supplementary file 1 [file Table_1.xlsx]

## Sheet: Supplementary Material 1
Supplementary Material 1: Transcriptomic analysis of control and P. oligandrum inoculated roots at 3, 5, 7 and 14 days post inoculation. RNAseq experiments were performed on RNAs extracted from in vitro grown plants inoculated with P. oligandrum oospores. Gene models correspond to the Medicago truncatula A17 r5.0 genome portal genome assembly and the annotation release 1.8. For each gene a ratio …
Mt5.0 (r1.7) locus tag	A17 Genome Assembly v4.0	Log2 FC 3 dpi	FDR 3 dpi	Log2 FC 5 dpi	FDR 5 dpi	Log2 FC 7 dpi	FDR 7 dpi	Log2 FC 14 dpi	FDR 14 dpi	Cluster	Annotation	ACRONYM	DESCRIPTION
MtrunA17_Chr1g0190821	Medtr1g080990	1.65719	0.00501777	5.8024	4.24765e-24	5.15947	5.96868e-21	3.18461	1.33376e-09	1	hypothetical protein	MtN26-2	Nodulin26
MtrunA17_Chr3g0139401	Medtr3g109430	1.04964	0.0068355	2.89361	1.22108e-19	4.2828	2.59791e-39	1.651	1.21835e-07	1	hypothetical protein
MtrunA17_Chr6g0463521	Medtr6g034930	1.29909	0.0293721	2.26361	1.00312e-06	3.88883	6.67216e-17	1.92484	2.72984e-05	1	hypothetical protein
MtrunA17_Chr2g0304411	Medtr6g471740	1.93386	0.0116696	4.09756	4.24765e-24	4.56914	5.90871e-30	2.21949	4.305e-09	1	hypothetical protein	MtPRP669_10	Pro-rich Protein Group 669
MtrunA17_Chr3g0143761	#N/A	3.28154	1.05447e-08	4.44904	2.21628e-16	4.28241	5.91912e-16	2.27486	1.05715e-05	1	hypothetical protein
MtrunA17_Chr1g0184021	#N/A	2.67661	8.91937e-05	3.48098	5.77462e-08	3.69321	4.4107e-09	2.51501	7.03987e-05	1	hypothetical protein
MtrunA17_Chr8g0367181	Medtr8g068265	1.42241	0.000130267	4.04335	3.24889e-30	3.37792	3.49648e-23	1.84271	6.92257e-08	1	Putative 1-deoxy-D-xylulose-5-phosphate synthase	MtDXS2	1-deoxy-D-xylulose 5-phosphate synthase 2 (plastidial methylerythritol phosphate (MEP) pathway)
MtrunA17_Chr1g0161041	Medtr1g032140	0	#N/A	3.26063	1.65269e-13	3.54093	7.53573e-16	2.72912	6.60447e-10	1	Putative 2,4-dihydroxy-1,4-benzoxazin-3-one-glucoside dioxygenase
MtrunA17_Chr4g0046331	Medtr4g088170	1.64031	8.0715e-05	3.60621	4.37077e-20	3.37025	2.00347e-18	1.36551	0.000488925	1	Putative 2-hydroxyisoflavanone synthase
MtrunA17_Chr4g0046351	Medtr4g088195	2.26754	0.000101528	3.73313	1.22917e-11	3.63647	1.63721e-11	1.67052	0.00235537	1	Putative 2-hydroxyisoflavanone synthase
MtrunA17_Chr5g0447941	Medtr5g097900	1.62041	0.000263192	3.18376	2.74731e-15	2.83159	5.29196e-13	1.5628	0.000152112	1	Putative 6'-deoxychalcone synthase
MtrunA17_Chr5g0442701	Medtr5g090830	2.71567	3.92739e-07	2.63055	1.18262e-07	2.43736	4.23235e-07	1.63973	0.00110542	1	Putative alcohol O-acetyltransferase
MtrunA17_Chr5g0406351	Medtr5g023260	1.29266	0.000316608	3.30797	2.10499e-23	3.49985	2.81287e-26	1.43862	1.17565e-05	1	Putative amino acid transporter, transmembrane domain-containing protein
MtrunA17_Chr1g0190651	Medtr1g080800	0	#N/A	5.74953	1.72774e-16	6.93021	1.00623e-21	3.65417	2.12744e-08	1	Putative Barwin domain, RlpA-like domain superfamily protein	MtPR4	pathogenesis-related protein 4, SA-inducible
MtrunA17_Chr2g0295051	Medtr2g035130	1.29704	0.000151155	3.13142	4.94212e-23	2.43273	1.98622e-15	2.00543	1.48206e-10	1	Putative Bet v I/Major latex protein	MtPR10-3	Pathogenesis-related protein 10 (TC76511)
MtrunA17_Chr2g0295064	Medtr2g035140	1.99437	2.19833e-05	5.18764	1.05074e-27	5.95625	2.94861e-34	4.38624	1.0421e-20	1	Putative Bet v I/Major latex protein	MtPR10-6	Pathogenesis-related protein 10 (defense response-activated, TC94217)
MtrunA17_Chr2g0295091	Medtr2g035190	1.71393	0.000855113	5.10867	3.82528e-24	5.29017	5.40857e-26	4.13131	5.08225e-17	1	Putative Bet v I/Major latex protein
MtrunA17_Chr6g0462311	Medtr6g033450	0	#N/A	4.62427	1.34948e-20	5.02305	9.38988e-24	5.14374	1.84897e-22	1	Putative Bet v I/Major latex protein
MtrunA17_Chr4g0067951	#N/A	0	#N/A	4.2515	4.89387e-23	4.71918	1.56643e-27	4.07272	1.0421e-20	1	Putative Bet v I/Major latex protein	MtPR10-5	Pathogenesis-related protein 10 (TC123318, PR10.2 group)
MtrunA17_Chr6g0462291	#N/A	0.994742	0.038133	3.87069	6.38109e-21	5.41747	6.15961e-35	3.36655	7.88631e-16	1	Putative Bet v I/Major latex protein
MtrunA17_Chr4g0013471	Medtr4g029690	1.53132	0.0358811	4.00095	9.88226e-18	3.08193	2.85785e-12	2.18507	8.75987e-07	1	Putative beta-amyrin 11-oxidase
MtrunA17_Chr4g0033311	Medtr4g066580	0	#N/A	3.53073	2.73351e-20	4.10124	2.74695e-26	1.6779	8.07753e-06	1	Putative beta-glucosidase
MtrunA17_Chr5g0435261	Medtr5g079890	0	#N/A	2.99906	4.59415e-10	3.50766	2.07745e-13	2.34143	1.01195e-06	1	Putative C2 domain-containing protein
MtrunA17_Chr4g0053021	Medtr4g094812	0.937837	0.0441552	3.8935	7.02145e-23	4.0826	3.00108e-25	2.53071	4.22093e-11	1	Putative caffeoyl-CoA O-methyltransferase
MtrunA17_Chr2g0295371	Medtr2g435490	2.93585	6.94901e-10	4.63807	3.71519e-22	4.37798	7.73955e-21	2.16368	1.67698e-06	1	Putative CAP superfamily protein	AtPR-1-like;MtCAPE12	pathogenesis-related protein 1 (SA-inducible in Mt);CAP-derived peptide 12
MtrunA17_Chr8g0352301	Medtr8g037290	1.43311	0.000261563	3.8211	8.55413e-25	3.5308	2.39771e-22	1.50747	3.6158e-05	1	Putative carotenoid oxygenase
MtrunA17_Chr1g0201381	Medtr1g097910	4.08474	1.52181e-09	3.83732	1.31609e-09	3.71991	1.63048e-09	1.54816	0.0153587	1	Putative chalcone synthase
MtrunA17_Chr1g0201391	Medtr1g097910	2.20508	8.36515e-06	2.81616	9.63176e-10	2.74954	9.84478e-10	1.43779	0.00222932	1	Putative chalcone synthase
MtrunA17_Chr1g0201421	Medtr1g097935	4.62366	2.28791e-07	4.41117	1.00673e-07	4.17931	1.73974e-07	1.70768	0.0382766	1	Putative chalcone synthase
MtrunA17_Chr1g0201371	Medtr1g098140	3.77296	1.6938e-07	4.24816	4.87019e-10	3.89016	3.88746e-09	1.43593	0.0375945	1	Putative chalcone synthase
MtrunA17_Chr5g0395591	Medtr5g007760	5.08326	6.15561e-07	6.34291	1.27514e-10	5.82001	7.74237e-10	3.09453	0.000581934	1	Putative chalcone synthase	MtCHS-5	Chalcone synthase 4
MtrunA17_Chr7g0220161	Medtr7g016700	3.52608	5.4978e-07	5.29472	3.8422e-14	5.00266	1.99166e-13	1.81379	0.00640682	1	Putative chalcone synthase
MtrunA17_Chr7g0220171	Medtr7g016720	1.51315	0.00219036	3.24753	3.83493e-13	3.28802	8.65623e-14	1.18918	0.0102284	1	Putative chalcone synthase
MtrunA17_Chr7g0220181	Medtr7g016780	1.90512	0.000669626	3.66034	2.11071e-12	3.42389	1.69969e-11	1.58777	0.00232077	1	Putative chalcone synthase
MtrunA17_Chr7g0220201	Medtr7g016800	2.50725	4.64507e-06	4.08332	1.29829e-14	3.73061	4.44285e-13	1.2565	0.0194267	1	Putative chalcone synthase
MtrunA17_Chr7g0220211	Medtr7g016820	1.71737	2.94942e-05	3.19465	1.13698e-16	3.06164	6.04138e-16	0.913728	0.0256488	1	Putative chalcone synthase
MtrunA17_Chr1g0202241	Medtr1g099310	1.53343	0.000911346	3.94646	3.28499e-20	3.50006	3.82352e-17	2.56424	7.47399e-10	1	Putative chitinase
MtrunA17_Chr2g0329791	Medtr2g099470	1.93655	0.00184564	5.21396	1.16716e-18	4.96486	8.48311e-18	2.10485	0.000138424	1	Putative chitinase
MtrunA17_Chr6g0487981	Medtr6g091680	1.17561	0.0186603	4.02789	9.36251e-20	4.25116	6.19958e-22	2.60304	1.46409e-09	1	Putative class I-like SAM-dependent O-methyltransferase
MtrunA17_Chr5g0420951	#N/A	0	#N/A	4.31874	6.73386e-10	5.13333	3.55851e-13	1.50628	0.0315275	1	Putative codeine 3-O-demethylase
MtrunA17_Chr4g0026941	Medtr4g054920	1.41089	0.0208428	2.71671	5.21097e-07	6.03041	1.79786e-25	1.80871	0.000733314	1	Putative cytochrome P450
MtrunA17_Chr4g0058191	Medtr4g104540	1.14056	0.0274364	4.40958	4.18767e-22	3.88706	1.18747e-18	1.78521	4.13684e-05	1	Putative cytochrome P450
MtrunA17_Chr4g0058201	Medtr4g104550	1.93785	0.000478809	5.07235	2.1687e-21	4.46891	2.96825e-18	2.97844	2.75838e-09	1	Putative cytochrome P450
MtrunA17_Chr4g0050881	Medtr4g094340	1.20895	0.000270409	3.80195	6.75242e-34	3.9334	6.16946e-36	1.88018	5.37302e-10	1	Putative EamA domain-containing protein
MtrunA17_Chr7g0245911	Medtr7g075040	1.22674	0.0278086	4.15982	1.03475e-17	4.7584	1.6055e-22	1.6514	0.000481597	1	Putative EF-hand domain pair protein CML	MtCML40	Calmodulin-like 40
MtrunA17_Chr1g0197161	Medtr1g090667	1.74725	0.000250225	5.63144	4.24016e-37	5.73975	3.70258e-39	3.84431	8.94853e-21	1	Putative FAD-binding domain, FAD/NAD(P)-binding domain superfamily
MtrunA17_Chr3g0086651	Medtr3g024520	0	#N/A	4.96352	2.02802e-21	6.14878	1.4493e-29	3.01307	1.03971e-09	1	Putative flavonoid 3'-monooxygenase
MtrunA17_Chr1g0178941	Medtr1g060500	1.41411	0.000760518	3.49538	8.06555e-20	3.56303	4.9986e-21	1.10322	0.00486675	1	Putative GDSL lipase/esterase, SGNH hydrolase superfamily
MtrunA17_Chr1g0197891	Medtr1g091023	4.99306	4.2317e-08	6.58339	4.83459e-13	4.95011	3.93285e-09	3.84251	6.31757e-06	1	Putative geraniol 8-hydroxylase
MtrunA17_Chr5g0395331	Medtr5g007460	1.7872	0.00263814	3.50471	4.19908e-11	3.646	3.39882e-12	1.29358	0.0179428	1	Putative geraniol 8-hydroxylase
MtrunA17_Chr5g0395381	Medtr5g007550	1.85097	0.00655789	4.53258	3.72753e-13	4.00045	2.73663e-11	1.47212	0.0170134	1	Putative geraniol 8-hydroxylase
MtrunA17_Chr2g0323131	Medtr2g089120	1.59042	2.79265e-05	4.20311	4.68118e-30	4.04657	9.13092e-29	2.16383	8.20451e-10	1	Putative geranyl diphosphate diphosphatase	MtTPS6	terpene synthase 6
MtrunA17_Chr2g0285871	Medtr2g019250	2.25493	2.55134e-06	7.01435	4.44257e-55	6.5148	5.59258e-51	3.02717	2.48812e-15	1	Putative germin, rmlC-like cupin domain superfamily, rmlC-like jelly roll
MtrunA17_Chr6g0449731	Medtr6g005310	1.64016	6.4119e-07	4.84871	1.83947e-50	4.16299	2.6127e-40	1.07924	0.000431306	1	Putative germin, rmlC-like cupin domain superfamily, rmlC-like jelly roll
MtrunA17_Chr6g0449771	Medtr6g005340	1.99232	4.27134e-13	3.90049	6.14517e-50	3.79177	2.36314e-48	1.23127	9.54613e-07	1	Putative germin, rmlC-like cupin domain superfamily, rmlC-like jelly roll
MtrunA17_Chr6g0449761	#N/A	3.70859	3.30213e-10	5.99118	2.60009e-31	5.52605	7.37881e-29	1.82089	6.46915e-05	1	Putative germin, rmlC-like cupin domain superfamily, rmlC-like jelly roll
MtrunA17_Chr4g0038941	Medtr4g076255	2.65479	4.03484e-06	4.53094	7.42172e-17	4.35629	2.76555e-16	2.48953	1.49445e-06	1	Putative glucan endo-1,3-beta-D-glucosidase
MtrunA17_Chr8g0375301	#N/A	3.21918	1.03931e-05	4.55133	7.06661e-12	4.73481	4.08309e-13	2.17744	0.000596742	1	Putative glutamate decarboxylase
MtrunA17_Chr6g0483141	Medtr6g080440	1.59831	1.75425e-05	2.93061	3.97278e-19	3.25672	1.92346e-23	1.57513	1.33749e-06	1	Putative glutathione transferase
MtrunA17_Chr1g0157931	Medtr1g027140	0	#N/A	3.83849	1.60506e-15	4.36113	1.086e-19	2.50457	7.31207e-08	1	Putative glycerophosphodiester phosphodiesterase, protein kinase RLK-Pelle-LRK10L-2 family
MtrunA17_Chr4g0052851	Medtr4g094772	0	#N/A	4.99155	1.60577e-15	5.6093	7.90295e-19	3.45816	7.32196e-09	1	Putative isoflavone 2'-hydroxylase
MtrunA17_Chr7g0219141	Medtr7g014510	0	#N/A	3.02879	1.60768e-11	3.59913	1.03884e-15	2.46204	3.61122e-08	1	Putative isoflavone 7-O-methyltransferase
MtrunA17_Chr7g0219171	Medtr7g014570	1.12041	0.00326036	3.23147	1.49527e-21	3.11691	8.24128e-21	1.38544	4.16172e-05	1	Putative isoflavone 7-O-methyltransferase
MtrunA17_Chr7g0223231	Medtr7g024500	0	#N/A	4.61224	3.994e-19	4.43674	7.47225e-19	1.83238	0.000171084	1	Putative isoflavone 7-O-methyltransferase
MtrunA17_Chr6g0455341	Medtr6g015815	1.40377	0.00802534	4.28332	2.39894e-19	4.21177	1.72896e-19	1.63901	0.000373589	1	Putative isoflavone-7-O-beta-glucoside 6''-O-malonyltransferase
MtrunA17_Chr7g0222871	#N/A	3.60911	1.81362e-06	7.31835	1.47065e-19	7.66898	3.32691e-21	5.27177	4.16635e-12	1	Putative leucine-rich repeat-containing, plant-type, leucine-rich repeat domain superfamily
MtrunA17_Chr7g0224551	Medtr7g027960	0	#N/A	4.36765	7.90257e-13	4.16271	2.72967e-12	1.40618	0.0213662	1	Putative licodione synthase
MtrunA17_Chr7g0224561	Medtr7g028020	2.63517	2.94028e-05	5.99387	6.38109e-21	4.58257	1.28765e-14	1.20962	0.0476776	1	Putative licodione synthase
MtrunA17_Chr7g0218261	Medtr7g012040	3.25894	3.27831e-05	5.41385	1.5791e-12	6.40933	3.16777e-16	3.10345	1.48093e-05	1	Putative methyltransferase
MtrunA17_Chr8g0361451	Medtr8g466030	1.6687	0.000674956	5.94141	3.99658e-33	5.76809	5.28624e-32	3.16091	2.95671e-12	1	Putative NAD(P)H dehydrogenase (quinone)
MtrunA17_Chr4g0039311	Medtr4g077100	1.58538	0.00151183	3.45426	3.98692e-14	2.95234	2.74121e-11	1.33022	0.00419992	1	Putative NAD-dependent epimerase/dehydratase, NAD(P)-binding domain superfamily
MtrunA17_Chr3g0133681	Medtr3g101400	2.69573	0.000105365	5.50082	8.77035e-16	5.16556	5.7044e-15	1.86359	0.00347541	1	Putative patatin-like phospholipase domain, Acyl transferase/acyl hydrolase/lysophospholipase
MtrunA17_Chr3g0094671	Medtr3g045790	0	#N/A	2.86593	2.02802e-21	3.84393	5.25951e-36	1.72961	7.01223e-09	1	putative protein	MtECL19	Egg Cell1-Like
MtrunA17_Chr1g0154311	Medtr1g021610	0	#N/A	3.45748	1.87467e-15	3.44607	6.17233e-16	1.97059	3.5761e-06	1	Putative protein kinase RLK-Pelle-DLSV family
MtrunA17_Chr1g0154351	Medtr1g021635	0	#N/A	3.14229	1.83492e-16	3.58483	7.92454e-22	1.89655	2.18369e-07	1	Putative protein kinase RLK-Pelle-DLSV family
MtrunA17_Chr4g0048791	Medtr4g091850	1.00453	0.030987	3.54543	8.04052e-22	3.77543	1.01546e-26	1.69614	6.79972e-07	1	Putative protein kinase RLK-Pelle-DLSV family
MtrunA17_Chr8g0354431	Medtr8g041890	2.0342	0.000981684	3.81747	3.49608e-12	4.26889	6.12619e-15	2.05882	0.000119842	1	Putative protein kinase RLK-Pelle-DLSV family
MtrunA17_Chr2g0293081	Medtr2g031530	1.17916	0.0426597	4.07565	2.82369e-16	3.9209	8.48522e-16	2.03432	2.37517e-05	1	Putative protein kinase RLK-Pelle-WAK family
MtrunA17_Chr6g0476951	Medtr6g059530	1.63344	0.000751405	2.33521	1.23068e-07	3.39771	1.21088e-14	1.47608	0.00104379	1	Putative proteinase inhibitor I3, Kunitz legume, kunitz inhibitor STI-like superfamily	MtKunitz37	Kunitz-P Trypsin Inhibitor
MtrunA17_Chr8g0353491	Medtr8g040080	0	#N/A	3.5051	4.35191e-25	3.86208	3.57176e-30	1.82315	2.74883e-08	1	Putative sigma factor binding protein 1/2
MtrunA17_Chr4g0048361	Medtr4g091200	2.1563	0.000457215	4.80486	5.43315e-16	3.88428	5.91577e-12	1.30891	0.0259772	1	Putative tetrahydroberberine oxidase
MtrunA17_Chr6g0480971	Medtr6g075930	1.93375	0.00107162	3.82734	1.63078e-12	4.5904	4.00655e-17	2.88505	5.13864e-08	1	Putative TIR domain, P-loop containing nucleoside triphosphate hydrolase
MtrunA17_Chr8g0362611	Medtr8g469140	0	#N/A	2.66587	5.20563e-19	3.8346	6.89021e-36	2.29381	1.65095e-14	1	Putative TIR domain-containing protein
MtrunA17_Chr7g0267911	Medtr7g106830	1.16017	0.00313769	4.19098	1.53587e-31	3.96399	6.35331e-29	2.28215	5.77239e-11	1	Putative transaminase
MtrunA17_Chr1g0210091	Medtr1g111240	4.19317	4.89573e-08	3.35102	1.97524e-06	3.02467	8.5247e-06	2.56192	0.000224165	1	Putative trans-cinnamate 4-monooxygenase
MtrunA17_Chr1g0183961	Medtr1g069960	1.44083	0.0123466	4.17198	6.14211e-16	4.3712	1.13183e-17	1.96135	8.70607e-05	1	Putative transcription factor AP2-EREBP family
MtrunA17_Chr7g0263121	#N/A	2.78743	0.00330725	5.07847	7.22033e-14	3.55599	5.38957e-09	1.33216	0.0372003	1	Putative transcription factor C2H2 family
MtrunA17_Chr7g0257331	Medtr7g091370	1.29642	0.00466788	3.14362	7.98494e-15	3.68673	8.12853e-20	1.65571	4.0345e-05	1	Putative transcription factor HSF-type-DNA-binding family
MtrunA17_Chr8g0346561	Medtr8g027345	0.992021	0.0130301	4.45565	1.79826e-34	4.42775	9.02212e-35	1.76379	2.79859e-07	1	Putative transcription factor MYB-HB-like family	MtMYB041	Myeloblastosis (MYB) transcription factor 41
MtrunA17_Chr4g0004911	Medtr4g013260	0	#N/A	3.84357	2.40532e-22	4.15038	4.35634e-26	1.74806	4.50627e-06	1	Putative transcription factor WRKY family
MtrunA17_Chr7g0224801	Medtr7g028710	1.09375	0.00117795	2.95012	1.08558e-22	3.16257	3.15066e-26	1.30449	1.40624e-05	1	Putative transcription factor WRKY family
MtrunA17_Chr7g0262201	Medtr7g098700	0	#N/A	4.54263	1.87868e-26	3.71468	2.28234e-19	1.00716	0.0238987	1	Putative tyrosine decarboxylase
MtrunA17_Chr4g0025501	Medtr4g051515	1.09688	0.0140883	3.28604	5.37533e-18	3.17152	1.8262e-17	1.6261	1.74742e-05	1	Putative U box domain, armadillo-like helical, Zinc finger, RING/FYVE/PHD-type	MtPUB31	Plant U-box protein 31
MtrunA17_Chr6g0479261	Medtr6g071340	1.23134	0.0365528	3.55964	5.43448e-14	4.17943	5.00393e-19	1.43044	0.00249668	1	Putative U box domain, armadillo-like helical, Zinc finger, RING/FYVE/PHD-type	MtPUB48	Plant U-box protein 48
MtrunA17_Chr7g0218841	Medtr7g013260	0	#N/A	3.01477	2.26861e-07	4.0124	8.02043e-12	2.67037	5.46848e-06	1	Putative UDP-glucuronosyl/UDP-glucosyltransferase
MtrunA17_Chr5g0400961	Medtr5g015190	1.52898	0.0382324	4.48827	7.72161e-12	4.9302	5.54029e-14	2.3211	0.000244188	1	Putative VQ motif-containing protein
MtrunA17_Chr4g0052651	Medtr4g094720	0	#N/A	0	#N/A	-2.03757	5.84662e-06	-2.54425	9.13946e-08	2	1-Cys peroxiredoxin
MtrunA17_Chr1g0171881	Medtr1g051195	0	#N/A	-0.940119	0.00820753	-1.2069	0.000245135	-1.1558	0.00137476	2	hypothetical protein
MtrunA17_Chr1g0178341	Medtr1g059660	-0.52518	0.0329231	-0.780234	0.000175469	-0.753165	0.000169601	-1.01634	3.51162e-07	2	hypothetical protein
MtrunA17_Chr1g0181521	Medtr1g066720	0	#N/A	-0.648088	0.00773235	-0.770697	0.000503753	-1.34763	7.82042e-10	2	hypothetical protein
MtrunA17_Chr1g0193811	Medtr1g085680	0	#N/A	-0.682615	0.00192452	0	#N/A	-1.09966	7.6583e-08	2	hypothetical protein
MtrunA17_Chr1g0201871	Medtr1g098760	-1.22774	0.000118968	0	#N/A	0	#N/A	0	#N/A	2	hypothetical protein
MtrunA17_Chr1g0204861	Medtr1g103050	0	#N/A	-1.09745	2.01156e-09	-1.06563	2.17786e-09	-1.74134	4.6302e-21	2	hypothetical protein
MtrunA17_Chr1g0211921	Medtr1g114340	0	#N/A	-1.375	0.000264104	-1.73114	1.31516e-06	0	#N/A	2	hypothetical protein
MtrunA17_Chr2g0278571	Medtr2g008010	0	#N/A	0	#N/A	-1.22495	0.00384763	0	#N/A	2	hypothetical protein
MtrunA17_Chr2g0279561	Medtr2g009480	0	#N/A	0	#N/A	0	#N/A	-1.78198	0.000735248	2	hypothetical protein
MtrunA17_Chr2g0279971	Medtr2g010200	0	#N/A	0	#N/A	-1.04581	2.63358e-06	-1.14296	5.29213e-07	2	hypothetical protein
MtrunA17_Chr2g0281101	Medtr2g011720	-0.836016	0.00696628	-1.05558	6.19992e-05	-1.07161	1.85185e-05	-1.83414	3.6147e-13	2	hypothetical protein
MtrunA17_Chr2g0287961	Medtr2g022610	0	#N/A	0	#N/A	0	#N/A	-1.03918	4.99265e-06	2	hypothetical protein
MtrunA17_Chr2g0288271	Medtr2g022960	-0.472625	0.0459601	0	#N/A	-1.16569	2.28299e-10	0	#N/A	2	hypothetical protein
MtrunA17_Chr2g0290371	Medtr2g026420	0	#N/A	0	#N/A	-0.965265	0.0231144	-1.81941	2.12643e-05	2	hypothetical protein
MtrunA17_Chr2g0299071	Medtr2g038710	0	#N/A	-0.620254	0.00217414	-0.460485	0.0197749	-1.23122	3.67411e-11	2	hypothetical protein
MtrunA17_Chr2g0299611	Medtr2g039870	0	#N/A	-1.28703	1.78792e-05	-0.896568	0.00281967	-1.51913	3.67446e-06	2	hypothetical protein
MtrunA17_Chr2g0300811	Medtr2g042340	0	#N/A	-1.16615	0.026029	-1.36852	0.00388498	-2.10199	8.48741e-06	2	hypothetical protein
MtrunA17_Chr2g0313251	Medtr2g071740	0	#N/A	0	#N/A	0	#N/A	-1.00778	0.00264234	2	hypothetical protein
MtrunA17_Chr2g0319461	Medtr2g082930	-0.927589	0.0007568	-1.43702	1.31731e-09	-1.00008	1.94166e-05	-1.74082	1.55362e-13	2	hypothetical protein
MtrunA17_Chr2g0322101	Medtr2g087470	0.882954	0.0319138	0	#N/A	-1.59982	1.30221e-06	0	#N/A	2	hypothetical protein
MtrunA17_Chr2g0324311	Medtr2g090340	0.59353	0.0127797	-1.20503	1.39588e-09	-0.60073	0.0034934	-1.14681	9.05439e-09	2	hypothetical protein
MtrunA17_Chr2g0324591	Medtr2g090525	0	#N/A	-1.10281	7.77359e-07	-0.813712	0.000248902	-0.670931	0.00409089	2	hypothetical protein
MtrunA17_Chr2g0326981	Medtr2g095020	0	#N/A	0	#N/A	0	#N/A	-1.17437	3.1798e-05	2	hypothetical protein
MtrunA17_Chr2g0327011	Medtr2g095040	-1.16124	0.0033938	0	#N/A	0	#N/A	0	#N/A	2	hypothetical protein
MtrunA17_Chr2g0333051	Medtr2g103750	0	#N/A	-1.03944	2.8703e-12	-1.28863	5.89874e-19	-1.07187	7.97997e-13	2	hypothetical protein
MtrunA17_Chr2g0297451	Medtr2g438320	0	#N/A	0	#N/A	-1.17644	0.00264799	-1.59483	4.7939e-05	2	hypothetical protein
MtrunA17_Chr2g0297581	Medtr2g438540	0	#N/A	-1.15922	0.0189568	-1.21786	0.0069719	-1.74618	0.000101898	2	hypothetical protein
MtrunA17_Chr2g0297601	Medtr2g438560	0	#N/A	0	#N/A	-0.976737	0.0330477	-1.60792	0.000335595	2	hypothetical protein
MtrunA17_Chr3g0087041	Medtr3g026160	-2.2265	4.30602e-10	-0.786324	0.0413056	0	#N/A	0	#N/A	2	hypothetical protein
MtrunA17_Chr3g0087151	Medtr3g026230	-2.33558	1.98838e-16	-0.863853	0.0039119	0	#N/A	0	#N/A	2	hypothetical protein
MtrunA17_Chr3g0087211	Medtr3g026290	-2.54275	1.4518e-17	0	#N/A	0	#N/A	0	#N/A	2	hypothetical protein	MtPRP669_18	Pro-rich Protein Group 669
MtrunA17_Chr3g0087231	Medtr3g026330	-2.85722	8.65135e-19	-0.969391	0.00386427	0	#N/A	0	#N/A	2	hypothetical protein
MtrunA17_Chr3g0087351	Medtr3g026820	0	#N/A	0	#N/A	-0.85028	0.0248758	-1.08458	0.00511391	2	hypothetical protein
MtrunA17_Chr3g0099091	Medtr3g052285	0	#N/A	-0.64959	0.0187201	-1.111	6.35052e-06	-0.880825	0.000497071	2	hypothetical protein
MtrunA17_Chr3g0099171	Medtr3g052520	0	#N/A	-0.687526	0.0198536	-1.01582	0.000128461	-0.873608	0.00179023	2	hypothetical protein
MtrunA17_Chr3g0103371	Medtr3g061480	0	#N/A	0	#N/A	-0.513175	0.0351147	-1.14443	7.0445e-07	2	hypothetical protein
MtrunA17_Chr3g0116301	Medtr3g075030	0	#N/A	-0.997571	0.000195007	-1.23704	1.36267e-06	-1.19071	5.69611e-06	2	hypothetical protein
MtrunA17_Chr3g0117381	Medtr3g077550	-1.66538	7.93997e-08	-1.05878	0.000551649	-0.621337	0.0440583	-2.47533	6.62531e-17	2	hypothetical protein
MtrunA17_Chr3g0121261	Medtr3g083570	0	#N/A	-0.876806	6.05069e-05	-0.797803	0.00016716	-1.74985	1.56477e-16	2	hypothetical protein
MtrunA17_Chr3g0134941	Medtr3g103260	0	#N/A	0	#N/A	-1.1509	0.000256207	0	#N/A	2	hypothetical protein
MtrunA17_Chr3g0141141	Medtr3g111360	0	#N/A	-1.30553	4.21489e-06	-1.15384	1.71479e-05	-1.70707	2.2978e-10	2	hypothetical protein
MtrunA17_Chr3g0145931	Medtr3g118300	0	#N/A	-1.12013	3.08452e-14	-1.03327	7.41032e-13	-0.566777	0.000216255	2	hypothetical protein
MtrunA17_Chr4g0003741	Medtr4g011250	0	#N/A	0	#N/A	-1.57441	0.000355644	0	#N/A	2	hypothetical protein
MtrunA17_Chr4g0030371	Medtr4g061650	0	#N/A	-0.920394	0.00287247	-0.702755	0.0180458	-1.29987	1.33679e-05	2	hypothetical protein
MtrunA17_Chr4g0032521	Medtr4g065107	-1.18724	0.0039074	-0.617344	0.0446773	-0.698022	0.0106952	-0.851647	0.00183756	2	hypothetical protein
MtrunA17_Chr4g0038791	Medtr4g076050	0	#N/A	0	#N/A	-1.45517	5.01185e-07	0	#N/A	2	hypothetical protein
MtrunA17_Chr4g0049951	Medtr4g093910	-1.98629	1.41735e-14	0	#N/A	0	#N/A	0	#N/A	2	hypothetical protein
MtrunA17_Chr4g0049921	Medtr4g093940	-2.33648	3.67165e-15	0	#N/A	0	#N/A	0	#N/A	2	hypothetical protein
MtrunA17_Chr4g0049911	Medtr4g093950	-2.15311	7.71445e-17	0	#N/A	0	#N/A	0	#N/A	2	hypothetical protein
MtrunA17_Chr4g0058451	Medtr4g104870	0	#N/A	-1.46857	5.70034e-11	-1.31469	1.96901e-09	-1.6194	4.32567e-13	2	hypothetical protein
MtrunA17_Chr4g0073051	Medtr4g129300	0	#N/A	0	#N/A	0	#N/A	-1.07734	0.000570452	2	hypothetical protein
MtrunA17_Chr5g0393421	Medtr5g004650	0	#N/A	-0.664234	0.0002874	-0.835744	1.03115e-06	-1.09528	3.93132e-10	2	hypothetical protein
MtrunA17_Chr5g0408321	Medtr5g025800	0.999822	0.00860834	0	#N/A	0	#N/A	-1.21259	0.000603043	2	hypothetical protein
MtrunA17_Chr5g0418481	Medtr5g043580	-0.724397	2.6808e-05	-0.63221	0.000113605	-0.495719	0.00206858	-1.1029	1.34305e-12	2	hypothetical protein
MtrunA17_Chr5g0425081	Medtr5g061550	0	#N/A	0	#N/A	-1.4321	0.000236365	0	#N/A	2	hypothetical protein
MtrunA17_Chr5g0438441	Medtr5g084410	0	#N/A	0	#N/A	0.801139	0.0259816	-1.09801	0.00224995	2	hypothetical protein	MtNodGRP39	Nodule-specific Glycine-rich
MtrunA17_Chr5g0440351	Medtr5g087510	0	#N/A	-0.950693	0.00124857	-1.00057	0.000331348	0	#N/A	2	hypothetical protein
MtrunA17_Chr5g0442981	Medtr5g091190	0	#N/A	-0.916467	6.20933e-08	-0.869706	1.08124e-07	-1.17402	1.17247e-12	2	hypothetical protein
MtrunA17_Chr5g0444521	Medtr5g093240	-0.732121	0.00328976	-0.57468	0.0165194	-0.61223	0.00563955	-1.14238	7.10813e-08	2	hypothetical protein
MtrunA17_Chr5g0448271	Medtr5g098530	0	#N/A	0	#N/A	0	#N/A	-2.05673	3.06259e-09	2	hypothetical protein
MtrunA17_Chr6g0449011	Medtr6g004140	-0.722921	0.000419463	-0.65123	0.000414547	-0.606733	0.000575206	-1.12216	5.35284e-11	2	hypothetical protein
MtrunA17_Chr6g0485391	Medtr6g086485	0	#N/A	-0.934286	0.0165799	-1.1896	0.000852857	-1.70841	1.05396e-06	2	hypothetical protein
MtrunA17_Chr6g0474081	Medtr6g465290	0	#N/A	-0.700525	0.000983869	-0.628475	0.00202865	-1.56649	2.09172e-15	2	hypothetical protein
MtrunA17_Chr7g0219701	Medtr7g015520	-1.04083	0.0140944	0	#N/A	0	#N/A	-2.00785	2.12566e-08	2	hypothetical protein
MtrunA17_Chr7g0228251	Medtr7g035095	0	#N/A	0	#N/A	0	#N/A	-1.04256	0.00192585	2	hypothetical protein
MtrunA17_Chr7g0253061	Medtr7g085330	0	#N/A	-1.09603	1.3353e-12	-0.935311	4.26695e-10	0	#N/A	2	hypothetical protein
MtrunA17_Chr7g0259311	Medtr7g094220	-0.56751	0.000896448	-0.641041	2.5599e-05	-0.59589	5.281e-05	-1.05855	4.19727e-13	2	hypothetical protein
MtrunA17_Chr7g0267381	Medtr7g106130	0	#N/A	0	#N/A	0	#N/A	-1.33301	1.72577e-06	2	hypothetical protein
MtrunA17_Chr7g0269801	Medtr7g109280	0	#N/A	-0.84056	0.00239351	-0.745128	0.0053144	-1.15113	1.41458e-05	2	hypothetical protein
MtrunA17_Chr8g0346321	Medtr8g027100	0	#N/A	0	#N/A	-1.06763	0.011719	-1.6869	0.000318167	2	hypothetical protein
MtrunA17_Chr8g0352081	Medtr8g036830	0	#N/A	-0.63547	0.0301666	-0.640546	0.0170668	-1.50094	7.41624e-09	2	hypothetical protein	MtNCR279	Nodule-specific Cysteine-Rich peptide
MtrunA17_Chr8g0368671	Medtr8g069910	0	#N/A	0	#N/A	-0.44912	0.0423162	-1.02142	1.01709e-06	2	hypothetical protein
MtrunA17_Chr8g0372001	Medtr8g075960	-0.760664	9.11303e-06	-0.704173	1.27506e-05	-0.85206	2.80355e-08	-1.11461	9.78377e-13	2	hypothetical protein
MtrunA17_Chr8g0379491	Medtr8g087320	0	#N/A	0	#N/A	-1.47083	3.72634e-10	-0.761869	0.00321905	2	hypothetical protein
MtrunA17_Chr8g0383161	Medtr8g091950	0	#N/A	0	#N/A	-1.34978	0.000182088	-0.992106	0.0114874	2	hypothetical protein
MtrunA17_Chr8g0388641	Medtr8g099765	0	#N/A	0	#N/A	0	#N/A	-1.42292	1.58825e-06	2	hypothetical protein
MtrunA17_Chr3g0078981	#N/A	0	#N/A	-0.909633	5.65288e-06	-1.30295	7.43483e-12	-0.530332	0.0105988	2	hypothetical protein
MtrunA17_Chr3g0133311	#N/A	0	#N/A	-0.677501	0.00302084	-1.71352	2.00461e-16	-2.08799	3.20992e-20	2	hypothetical protein
MtrunA17_Chr1g0195161	#N/A	0	#N/A	0	#N/A	-1.25313	0.00494454	-1.34567	0.00557142	2	hypothetical protein
MtrunA17_Chr3g0130401	#N/A	0	#N/A	0	#N/A	-1.58345	6.40398e-06	-1.5361	4.52315e-05	2	hypothetical protein
MtrunA17_Chr3g0081581	#N/A	0	#N/A	0	#N/A	-1.31246	0.00046861	-1.60216	4.39871e-05	2	hypothetical protein
MtrunA17_Chr4g0044401	#N/A	0	#N/A	0	#N/A	-1.03509	8.65718e-05	-0.72279	0.0175794	2	hypothetical protein
MtrunA17_Chr3g0115491	#N/A	0	#N/A	0	#N/A	-1.01514	1.55289e-08	-0.505269	0.00822415	2	hypothetical protein
MtrunA17_Chr5g0403881	#N/A	-1.12319	2.22799e-06	-0.670107	0.00465185	-0.500229	0.0298234	-1.12055	2.62152e-07	2	hypothetical protein
MtrunA17_Chr4g0067691	#N/A	-0.856394	0.0335335	-1.16021	0.000672164	-0.887275	0.00767488	-1.27649	0.000120066	2	hypothetical protein
MtrunA17_Chr4g0057821	#N/A	0	#N/A	0	#N/A	0	#N/A	-1.14129	8.51933e-09	2	hypothetical protein
MtrunA17_Chr2g0297441	#N/A	0	#N/A	0	#N/A	0	#N/A	-1.18878	0.00511391	2	hypothetical protein
MtrunA17_Chr2g0297641	#N/A	0	#N/A	0	#N/A	0	#N/A	-1.37703	0.00191064	2	hypothetical protein
MtrunA17_Chr3g0124901	#N/A	0	#N/A	0	#N/A	0	#N/A	-1.2782	0.000729825	2	hypothetical protein
MtrunA17_Chr2g0297671	#N/A	0	#N/A	-1.09362	0.0262632	0	#N/A	-1.46637	0.00101371	2	hypothetical protein
MtrunA17_Chr2g0322451	#N/A	0	#N/A	0	#N/A	-1.05978	3.19533e-11	0	#N/A	2	hypothetical protein
MtrunA17_Chr1g0164431	#N/A	0	#N/A	0	#N/A	-1.44954	2.65728e-05	0	#N/A	2	hypothetical protein
MtrunA17_Chr8g0380001	#N/A	0	#N/A	0	#N/A	-1.62429	2.10016e-05	0	#N/A	2	hypothetical protein
MtrunA17_Chr1g0157031	#N/A	-0.741264	0.00780702	-1.13239	1.41183e-06	-0.933253	1.95469e-05	0	#N/A	2	hypothetical protein
MtrunA17_Chr6g0460641	#N/A	-0.836959	0.0437355	-1.27278	2.15816e-05	-0.906846	0.00211885	-1.74428	1.58371e-09	2	hypothetical protein	MtPSY7	Plant Peptide Containing Sulfated Tyrosine
MtrunA17_Chr5g0426511	#N/A	-1.21279	2.68372e-06	0.637448	0.0171349	0	#N/A	0	#N/A	2	hypothetical protein
MtrunA17_Chr4g0049931	#N/A	-2.18949	1.62001e-20	0	#N/A	0	#N/A	0	#N/A	2	hypothetical protein
MtrunA17_Chr7g0251291	#N/A	1.76328	0.00118199	4.60933	1.69812e-19	4.63936	1.84908e-20	2.3099	1.96568e-06	2	hypothetical protein
MtrunA17_Chr8g0372711	Medtr8g076940	0	#N/A	0	#N/A	-1.02092	3.40946e-05	0	#N/A	2	Putative (+)-abscisic acid 8'-hydroxylase
MtrunA17_Chr4g0003821	Medtr4g011370	0	#N/A	-1.11097	8.11352e-14	-1.38823	1.67775e-21	-0.686015	7.78941e-06	2	Putative (6-4)DNA photolyase
MtrunA17_Chr2g0312931	Medtr2g070420	0	#N/A	-0.59028	0.014869	0	#N/A	-1.1354	1.94936e-07	2	Putative (S)-2-hydroxy-acid oxidase
MtrunA17_Chr8g0376491	#N/A	0	#N/A	0	#N/A	0	#N/A	-1.11635	0.000589846	2	Putative (S)-2-hydroxy-acid oxidase
MtrunA17_Chr5g0394751	Medtr5g006670	0	#N/A	-0.552553	0.00678366	-1.52649	1.92084e-17	-1.30274	2.27056e-12	2	Putative 12-oxophytodienoate reductase
MtrunA17_Chr5g0394771	Medtr5g006710	0	#N/A	0	#N/A	-1.41241	8.39223e-11	-1.43111	1.28768e-10	2	Putative 12-oxophytodienoate reductase
MtrunA17_Chr5g0394811	Medtr5g006740	0	#N/A	0	#N/A	0	#N/A	-1.39363	9.97456e-05	2	Putative 12-oxophytodienoate reductase
MtrunA17_Chr5g0442671	Medtr5g090780	0.707346	0.00140356	-0.774324	5.68094e-05	0	#N/A	-1.10656	1.24999e-09	2	Putative 15-cis-phytoene synthase
MtrunA17_Chr7g0256301	Medtr7g089950	-1.51337	9.04118e-06	-0.828289	0.00424048	-0.663851	0.0114084	0	#N/A	2	Putative 1-phosphatidylinositol-4-phosphate 5-kinase
MtrunA17_Chr6g0479331	Medtr6g071475	0	#N/A	-0.953436	0.000806032	-0.908969	0.0009109	-1.40508	2.03281e-07	2	Putative 2-acylglycerol O-acyltransferase
MtrunA17_Chr8g0365421	Medtr8g064610	-1.25756	1.08628e-10	-0.687136	0.000508288	-0.50463	0.00956941	-1.37411	1.55362e-13	2	Putative 2-alkenal reductase (NAD(P)(+))
MtrunA17_Chr2g0331271	Medtr2g101380	-0.810108	0.00580011	-0.715251	0.00964127	0	#N/A	-1.49678	2.32578e-09	2	Putative 2Fe-2S ferredoxin-type iron-sulfur binding domain, Beta-grasp domain superfamily
MtrunA17_Chr2g0277481	Medtr2g006290	-0.400831	0.039516	-0.644507	8.04621e-05	-0.57111	0.000332979	-1.18825	2.80947e-14	2	Putative 2Fe-2S ferredoxin-type iron-sulfur binding domain, ferredoxin [2Fe-2S], plant
MtrunA17_Chr8g0380641	Medtr8g088720	0	#N/A	0	#N/A	0	#N/A	-1.87308	6.87316e-09	2	Putative 2Fe-2S ferredoxin-type iron-sulfur binding domain, ferredoxin [2Fe-2S], plant
MtrunA17_Chr7g0233871	Medtr7g051020	0	#N/A	-0.552042	0.0146596	0	#N/A	-1.16995	7.1396e-09	2	Putative 2-hydroxyisoflavanone dehydratase, Carboxylesterase
MtrunA17_Chr1g0188121	Medtr1g076570	-0.806679	0.00263835	-0.982187	5.01506e-05	-0.65769	0.00662043	-1.65122	1.56762e-12	2	Putative 2-methyl-6-phytyl-1,4-hydroquinone methyltransferase
MtrunA17_Chr2g0286401	Medtr2g020160	-0.662592	0.0058646	-1.18549	5.49804e-09	-1.18395	2.39202e-09	-1.62408	1.12643e-15	2	Putative 3,8-divinyl protochlorophyllide a 8-vinyl-reductase (NADPH)
MtrunA17_Chr1g0203761	Medtr1g101400	0	#N/A	0	#N/A	0	#N/A	-2.17291	3.36917e-09	2	Putative 4-hydroxy-tetrahydrodipicolinate reductase
MtrunA17_Chr1g0203561	Medtr1g100753	-1.30235	2.11048e-05	-0.986745	0.000193807	-0.769656	0.003112	-1.05667	3.76524e-05	2	Putative 6-phospho-3-hexuloisomerase
MtrunA17_Chr5g0397331	Medtr5g010090	0	#N/A	0	#N/A	0	#N/A	-1.42639	1.00322e-06	2	Putative 6-phosphofructo-2-kinase, Fructose-2,6-bisphosphate 2-phosphatase
MtrunA17_Chr3g0118691	Medtr3g479520	-0.950194	0.00701548	0	#N/A	0	#N/A	-2.24272	7.36672e-12	2	Putative 7-deoxyloganetin glucosyltransferase
MtrunA17_Chr6g0454281	Medtr6g014195	0	#N/A	0	#N/A	0	#N/A	-1.2834	0.000309122	2	Putative 7-deoxyloganetin glucosyltransferase
MtrunA17_Chr2g0316021	Medtr2g076970	0	#N/A	-0.958725	0.00012179	-1.09069	4.2568e-06	-0.785078	0.00192533	2	Putative AAA+ ATPase domain, ATPase, AAA-type, core, AAA-type ATPase domain-containing protein
MtrunA17_Chr1g0176441	Medtr1g054935	0	#N/A	-0.906812	2.7503e-11	-1.0134	2.61015e-14	-0.607183	1.56609e-05	2	Putative AAA+ ATPase domain, pigment precursor permease/Protein ATP-binding cassette sub-family G
MtrunA17_Chr7g0263351	Medtr7g100120	-1.0746	1.28944e-06	0	#N/A	0	#N/A	0	#N/A	2	Putative AAA+ ATPase domain, pigment precursor permease/Protein ATP-binding cassette sub-family G
MtrunA17_Chr1g0148121	Medtr1g009860	-1.17631	8.65135e-19	-0.753567	9.14843e-09	-0.643191	6.98826e-07	-0.810419	6.35979e-10	2	Putative ABC-type Cd(2+) transporter
MtrunA17_Chr3g0138261	Medtr3g107870	0	#N/A	0	#N/A	-1.54075	0.00664389	0	#N/A	2	Putative ABC-type D-allose transporter	MtPDR1a	pleiotropic drug resistance protein 1a (ABC transporter)
MtrunA17_Chr7g0261971	Medtr7g098320	0	#N/A	-1.16211	0.000825224	-1.79773	2.62599e-08	-0.981755	0.00458036	2	Putative ABC-type D-allose transporter	MtABCG56	ATP-binding cassette (ABC) transporter type G
MtrunA17_Chr5g0439381	Medtr5g085850	0	#N/A	-0.571319	0.0121346	-0.60639	0.00415415	-1.85232	2.33742e-19	2	Putative ABC-type nitrate transporter	MtNPF6.8;MtNRT1.3	NRT1/ PTR FAMILY;nitrate transporter / peptide transporter
MtrunA17_Chr1g0167761	Medtr1g043290	0	#N/A	0	#N/A	-1.0462	0.0028898	0	#N/A	2	Putative ABC-type phosphate transporter	MtPT2	phosphate transporter
MtrunA17_Chr4g0028621	Medtr4g058000	0	#N/A	0	#N/A	-0.695003	0.0462774	-1.06147	0.00433199	2	Putative ABC-type sulfate transporter
MtrunA17_Chr4g0060401	Medtr4g108153	0	#N/A	0	#N/A	-1.58698	3.14263e-06	-1.31705	0.000258047	2	Putative ABC-type sulfate transporter
MtrunA17_Chr6g0477811	Medtr6g066240	0	#N/A	0	#N/A	0	#N/A	-2.14823	0.000176067	2	Putative ABC-type sulfate transporter	MtSGE1	stigma exsertion1 (ABCG transporter)
MtrunA17_Chr4g0039821	Medtr4g077930	0	#N/A	-1.77806	3.52192e-15	-0.921924	5.4468e-05	-1.38431	1.33376e-09	2	Putative ABC-type xenobiotic transporter	MtABAB13	ATP-Binding-Cassette (ABC) transporter typeB (P-glycoprotein (MDR/PGP/ABCB) efflux/conditional auxin transporter)
MtrunA17_Chr6g0451911	Medtr6g008820	0	#N/A	0	#N/A	-1.01562	9.30308e-11	0	#N/A	2	Putative ABC-type xenobiotic transporter	MtABAB22	ATP-Binding-Cassette (ABC) transporter typeB (P-glycoprotein (MDR/PGP/ABCB) efflux/conditional auxin transporter)
MtrunA17_Chr6g0452141	Medtr6g009150	-1.03025	0.00260398	0	#N/A	-1.31373	1.11357e-05	-0.804278	0.0240259	2	Putative ABC-type xenobiotic transporter	MtABAB27	ATP-Binding-Cassette (ABC) transporter typeB (P-glycoprotein (MDR/PGP/ABCB) efflux/conditional auxin transporter)
MtrunA17_Chr8g0363771	Medtr8g061970	-0.843093	7.7305e-07	-0.918889	7.27019e-09	-1.13329	1.70041e-13	-0.406596	0.0197275	2	Putative ABC-type xenobiotic transporter
MtrunA17_Chr6g0478161	Medtr6g069000	0	#N/A	-1.14924	2.97097e-08	-1.45601	3.95451e-13	-1.42167	8.92969e-12	2	Putative abieta-7,13-dien-18-ol hydroxylase
MtrunA17_Chr1g0168451	Medtr1g045120	0	#N/A	0	#N/A	-1.03295	0.00201322	0	#N/A	2	Putative Acid phosphatase
MtrunA17_Chr1g0178831	Medtr1g060360	0	#N/A	0	#N/A	-1.4208	0.00174643	-1.33184	0.0066184	2	Putative Acid phosphatase
MtrunA17_Chr8g0393271	Medtr8g107620	0	#N/A	-1.26834	0.00191187	0	#N/A	-2.63892	1.39062e-11	2	Putative Acid phosphatase
MtrunA17_Chr6g0479451	Medtr0200s0050	0	#N/A	0	#N/A	-1.02183	0.000105329	-0.626338	0.0321821	2	Putative Acid phosphatase, Peroxidase
MtrunA17_Chr2g0333871	Medtr2g105090	0	#N/A	0	#N/A	0	#N/A	-1.21478	7.54427e-06	2	Putative ACT domain-containing protein ACR1-12
MtrunA17_Chr8g0385881	Medtr8g099920	0	#N/A	-0.797843	0.00053716	-0.531261	0.0203502	-1.48421	9.79956e-12	2	Putative Acyl carrier protein (ACP)
MtrunA17_Chr6g0484911	Medtr6g085050	0	#N/A	-1.12401	4.55787e-13	-1.07783	1.64537e-12	-1.10719	1.53293e-12	2	Putative adaptor protein ClpS, core
MtrunA17_Chr3g0140051	Medtr3g110172	-1.30351	9.68072e-09	0	#N/A	0	#N/A	0	#N/A	2	Putative adenosylhomocysteine nucleosidase
MtrunA17_Chr2g0288581	Medtr2g023540	0	#N/A	-0.462295	0.0209913	-1.37655	9.80129e-16	-1.16736	4.0987e-11	2	Putative adenylyl-sulfate reductase (thioredoxin)
MtrunA17_Chr3g0106581	Medtr3g465800	0	#N/A	0	#N/A	0	#N/A	-1.33331	6.4991e-08	2	Putative alanine--glyoxylate transaminase
MtrunA17_Chr3g0106571	Medtr3g465800	0	#N/A	0	#N/A	0	#N/A	-1.2684	4.79979e-05	2	Putative alanine--glyoxylate transaminase
MtrunA17_Chr7g0225821	Medtr7g029540	0	#N/A	0	#N/A	-1.8878	0.0143459	-2.4838	0.00180287	2	Putative albumin I chain a	MtLegin24	Leginsulin
MtrunA17_Chr5g0411861	Medtr5g031290	0	#N/A	-0.759928	0.0305589	-1.06208	0.000826352	0	#N/A	2	Putative alcohol dehydrogenase (NAD(P)(+))
MtrunA17_Chr3g0117861	Medtr3g078170	0	#N/A	-1.57429	5.55847e-09	-1.69578	3.03478e-10	0	#N/A	2	Putative aldehyde dehydrogenase (NAD(+))
MtrunA17_Chr8g0372381	Medtr8g076480	0	#N/A	0	#N/A	0	#N/A	-1.25325	0.00249385	2	Putative aldehyde dehydrogenase (NAD(+))
MtrunA17_Chr1g0167421	Medtr1g042730	-1.07465	4.97588e-10	-0.585735	0.000872933	-0.604624	0.000300934	-0.806695	1.24905e-06	2	Putative aldo/keto reductase, NADP-dependent oxidoreductase domain-containing protein
MtrunA17_Chr4g0052021	Medtr4g094625	0	#N/A	0	#N/A	-0.44034	0.0382285	-1.12769	1.55189e-08	2	Putative aldolase-type TIM barrel
MtrunA17_Chr6g0456981	Medtr6g017165	0	#N/A	0	#N/A	-1.78441	0.000261262	0	#N/A	2	Putative allene-oxide cyclase
MtrunA17_Chr3g0123101	Medtr3g086050	0	#N/A	-1.68777	0.000104653	-1.9403	2.53261e-06	-2.85324	1.66659e-11	2	Putative alpha crystallin/Hsp20 domain, HSP20-like chaperone
MtrunA17_Chr5g0443541	Medtr5g091960	0	#N/A	-0.530928	0.0178212	0	#N/A	-1.07148	8.41302e-08	2	Putative alpha crystallin/Hsp20 domain, HSP20-like chaperone
MtrunA17_Chr4g0018641	Medtr4g036495	-1.12266	2.185e-09	-1.05284	3.76503e-10	-0.818499	9.00751e-07	-0.968361	8.11815e-09	2	Putative alpha/beta hydrolase-1, DNA photolyase, rossmann-like alpha/beta/alpha sandwich
MtrunA17_Chr7g0256191	Medtr7g089780	0	#N/A	-0.699647	0.0377615	-1.86102	6.15396e-11	-1.49982	2.79982e-07	2	Putative alpha-glucosidase
MtrunA17_Chr1g0212291	Medtr1g115190	-0.90846	2.55432e-06	-1.30934	5.81958e-14	-1.68639	1.08293e-22	-1.08395	1.73465e-09	2	Putative aluminum-activated malate transporter
MtrunA17_Chr5g0437961	Medtr5g083770	0	#N/A	-1.09225	9.55746e-06	-2.01206	7.2907e-18	-1.72834	6.60245e-13	2	Putative amino acid transporter, transmembrane domain-containing protein
MtrunA17_Chr5g0441201	Medtr5g088730	-0.576697	0.0348924	-0.528363	0.0371079	-0.500907	0.032955	-1.20789	3.95926e-08	2	Putative amino acid/polyamine transporter 2
MtrunA17_Chr1g0189971	Medtr1g079760	-1.58193	3.34818e-10	-1.46459	3.12562e-10	-1.78404	4.95533e-15	-1.49801	1.68972e-10	2	Putative ammonium transporter, ammonium/urea transporter
MtrunA17_Chr8g0376971	Medtr8g080080	0	#N/A	0	#N/A	-0.551511	0.0192767	-1.16093	1.51413e-07	2	Putative ankyrin repeat-containing domain-containing protein
MtrunA17_Chr8g0352611	Medtr8g038210	-1.30659	6.16249e-20	-1.01992	3.17609e-13	-0.342376	0.0239851	0	#N/A	2	Putative annexin	MtAnn1	annexin
MtrunA17_Chr4g0053071	Medtr4g094832	-0.878716	5.85023e-06	-0.7461	4.35114e-05	-1.12356	4.44905e-11	-1.00943	1.87271e-08	2	Putative anthocyanin 5-O-glucoside 6'''-O-malonyltransferase
MtrunA17_Chr6g0461381	Medtr6g029260	0	#N/A	0	#N/A	-1.02443	0.000337346	0	#N/A	2	Putative arabinogalactan protein 1/3/12/13/14/21
MtrunA17_Chr6g0468981	Medtr0088s0100	0	#N/A	0	#N/A	-1.94137	0.00114042	0	#N/A	2	Putative arginase
MtrunA17_Chr3g0112121	Medtr3g068030	-1.07364	4.00631e-07	-0.859469	2.95528e-05	0	#N/A	-1.34401	1.44188e-11	2	Putative ATPase, AAA-type, core, P-loop containing nucleoside triphosphate hydrolase	MtRCA	Rubisco activase (TC168053)
MtrunA17_Chr4g0009431	Medtr4g021210	-0.843071	3.32587e-05	-0.632237	0.00126269	-0.539883	0.00433412	-1.092	2.14778e-09	2	Putative ATPase, AAA-type, core, P-loop containing nucleoside triphosphate hydrolase
MtrunA17_Chr5g0435631	Medtr5g080450	-0.522126	0.0262162	-0.529882	0.0137962	0	#N/A	-1.34505	2.75994e-12	2	Putative ATPase, AAA-type, core, P-loop containing nucleoside triphosphate hydrolase
MtrunA17_Chr3g0098711	Medtr3g051220	0	#N/A	-4.03678	1.48722e-12	-3.25404	2.51127e-09	-2.61702	2.00798e-06	2	Putative B domain of TMEM189, localisation domain-containing protein
MtrunA17_Chr8g0386841	Medtr8g098260	0	#N/A	-0.715298	0.040948	-0.649044	0.0448701	-1.54973	5.15627e-07	2	Putative BAH domain, transcription elongation factor S-II, central domain-containing protein
MtrunA17_Chr1g0160371	Medtr1g030810	0	#N/A	-1.46849	1.09544e-05	-1.24211	0.000142171	-1.80787	3.76173e-08	2	Putative Bet v I/Major latex protein
MtrunA17_Chr1g0160391	Medtr1g030840	0	#N/A	-0.693307	0.000526749	-0.905116	1.09503e-06	-1.04215	4.35503e-08	2	Putative Bet v I/Major latex protein
MtrunA17_Chr8g0355771	Medtr8g045560	0	#N/A	-0.906139	0.0221939	0	#N/A	-3.00084	1.64386e-15	2	Putative Bet v I/Major latex protein
MtrunA17_Chr1g0160381	#N/A	-0.514087	0.0420148	-0.620117	0.00547211	-0.504199	0.0190574	-1.12779	3.67812e-08	2	Putative Bet v I/Major latex protein
MtrunA17_Chr5g0400411	Medtr5g014240	0	#N/A	0	#N/A	-0.804957	0.0012994	-1.07704	1.03799e-05	2	Putative beta-amyrin 11-oxidase	MtKAO240;MtKAO3	Ent-kaurenoic acid oxidase (cytochrome P450 family)
MtrunA17_Chr7g0235551	Medtr7g056103	-1.02603	3.6392e-07	-0.489273	0.0225131	-1.12642	1.15083e-09	-0.508819	0.0135262	2	Putative beta-amyrin 24-hydroxylase
MtrunA17_Chr3g0119841	Medtr3g080840	-0.993436	8.57625e-08	-0.781105	1.03311e-05	-0.609115	0.000505189	-1.19359	3.30957e-12	2	Putative beta-carotene isomerase
MtrunA17_Chr4g0038561	Medtr4g075540	0	#N/A	0	#N/A	-1.27884	0.000320268	-1.29723	0.000898464	2	Putative beta-fructofuranosidase
MtrunA17_Chr4g0056501	Medtr4g101630	-0.496458	0.0132294	-0.9456	1.84745e-08	-1.19565	1.88079e-13	-0.74747	1.27409e-05	2	Putative beta-fructofuranosidase	MtFRUCT2	soluble acid invertase FRUCT2
MtrunA17_Chr3g0088441	Medtr3g028720	-1.48277	0.0127153	-4.61508	2.73646e-17	-4.61274	1.03454e-17	-1.8961	0.000280419	2	Putative beta-glucosidase
MtrunA17_Chr1g0149491	Medtr1g012710	0	#N/A	-0.466643	0.0287309	-0.929554	4.7561e-07	-1.07278	1.09533e-08	2	Putative bifunctional inhibitor/plant lipid transfer protein/seed storage helical	MtnsLTP71	non-specific Lipid Transfer Protein
MtrunA17_Chr1g0205171	Medtr1g103420	-2.99329	1.62382e-14	-0.897689	0.0305561	0.828905	0.0353775	0.936464	0.0264595	2	Putative bifunctional inhibitor/plant lipid transfer protein/seed storage helical	MtnsLTP96	non-specific Lipid Transfer Protein
MtrunA17_Chr5g0398841	Medtr5g011980	0	#N/A	0	#N/A	-1.32693	1.80853e-05	-1.04079	0.00136753	2	Putative bifunctional inhibitor/plant lipid transfer protein/seed storage helical	MtnsLTP63	non-specific Lipid Transfer Protein
MtrunA17_Chr7g0234581	Medtr7g053090	-0.51301	0.039516	-0.956278	1.45193e-06	-0.883791	4.67517e-06	-1.38034	1.10297e-12	2	Putative Bile acid:sodium symporter/arsenical resistance protein Acr3
MtrunA17_Chr2g0332621	Medtr2g103280	0	#N/A	-0.854595	0.00539436	-0.717114	0.0115952	-1.70795	1.12438e-10	2	Putative biotin/lipoyl attachment
MtrunA17_Chr1g0153661	Medtr1g019750	0	#N/A	0	#N/A	0	#N/A	-1.44896	6.49442e-06	2	Putative BKI1/Probable membrane-associated kinase regulator 1/3/4
MtrunA17_Chr3g0133811	Medtr3g101560	0.509842	0.0427858	0	#N/A	-0.758478	0.000238693	-1.03743	3.61093e-07	2	Putative BKI1/Probable membrane-associated kinase regulator 1/3/4
MtrunA17_Chr3g0143491	Medtr3g114850	0	#N/A	-0.465225	0.0290032	0	#N/A	-1.10353	3.79849e-09	2	Putative Blue (type 1) copper binding protein
MtrunA17_Chr1g0147271	Medtr1g008500	0	#N/A	0	#N/A	0	#N/A	-2.93907	6.57914e-05	2	Putative BURP domain-containing protein
MtrunA17_Chr1g0194671	Medtr1g087030	-1.24026	0.00183031	-0.826997	0.0372208	0	#N/A	-1.44444	4.31642e-05	2	Putative calvin cycle protein CP12
MtrunA17_Chr1g0178601	Medtr1g059960	0	#N/A	-0.957542	4.55446e-07	-1.2969	1.22615e-12	-0.560444	0.00458036	2	Putative carbonic anhydrase
MtrunA17_Chr6g0450641	Medtr6g006990	0	#N/A	0	#N/A	0	#N/A	-5.02326	3.76961e-11	2	Putative carbonic anhydrase
MtrunA17_Chr7g0214851	Medtr7g406880	0	#N/A	0	#N/A	-1.09345	0.00580518	0	#N/A	2	Putative carboxylesterase
MtrunA17_Chr4g0039301	Medtr4g077070	0	#N/A	0	#N/A	-0.837565	0.00876594	-1.39416	1.09041e-05	2	Putative carboxylic ester hydrolase
MtrunA17_Chr4g0072591	Medtr0693s0030	0	#N/A	-0.868773	0.000129378	-0.774561	0.000454556	-1.17237	1.0846e-07	2	Putative casparian strip membrane protein
MtrunA17_Chr6g0488681	Medtr6g092840	0	#N/A	0	#N/A	-0.855368	1.22289e-05	-1.41855	2.35782e-12	2	Putative cation transporter
MtrunA17_Chr6g0488721	Medtr6g092940	0	#N/A	-0.928681	0.00189986	0	#N/A	-1.16422	4.36603e-05	2	Putative cation transporter
MtrunA17_Chr3g0119821	Medtr3g080810	0	#N/A	0	#N/A	-1.33601	0.00213025	0	#N/A	2	Putative cellulase
MtrunA17_Chr3g0077511	Medtr3g005560	-0.562203	0.00152051	-0.549734	0.000939642	-1.09018	4.31431e-13	-0.504739	0.00214734	2	Putative cellulose synthase (UDP-forming)
MtrunA17_Chr7g0252331	Medtr7g084300	-1.35466	2.01867e-09	-1.25568	6.17237e-09	-1.27395	1.59077e-09	0	#N/A	2	Putative chalcone synthase
MtrunA17_Chr3g0136201	Medtr3g104980	-1.56048	2.02922e-07	-0.93906	0.00157929	-0.663705	0.0227613	-1.62675	4.87545e-09	2	Putative Chaperone J-domain superfamily
MtrunA17_Chr7g0275231	Medtr7g116850	0	#N/A	-0.643875	0.00566971	-0.470901	0.0383765	-1.17097	5.46289e-08	2	Putative chitinase
MtrunA17_Chr6g0459451	Medtr6g023770	0	#N/A	0	#N/A	-1.17361	0.00247006	-2.82028	9.36946e-13	2	Putative chloride channel, voltage gated, chloride channel, core
MtrunA17_Chr1g0204521	Medtr1g102570	0	#N/A	-1.59072	5.46095e-12	-1.86486	2.139e-16	-1.0689	6.17662e-06	2	Putative chlorophyll A-B binding protein
MtrunA17_Chr1g0204671	Medtr1g102780	0	#N/A	-1.66047	1.85622e-12	-1.81339	5.35245e-15	-1.27632	9.59019e-08	2	Putative chlorophyll A-B binding protein
MtrunA17_Chr2g0301081	Medtr2g042720	-1.18635	0.00023526	-0.716041	0.0288223	0	#N/A	-1.91434	4.79066e-11	2	Putative chlorophyll A-B binding protein
MtrunA17_Chr3g0113311	Medtr3g070340	0	#N/A	-0.601995	0.00254461	0	#N/A	-1.04698	1.45091e-08	2	Putative chlorophyll A-B binding protein
MtrunA17_Chr3g0124681	Medtr3g088040	-1.05112	3.82291e-09	-0.813961	2.91809e-06	-0.651894	0.000153424	-1.2628	1.21617e-13	2	Putative chlorophyll A-B binding protein
MtrunA17_Chr4g0006181	Medtr4g015570	0	#N/A	0	#N/A	0	#N/A	-1.07988	2.08589e-06	2	Putative chlorophyll A-B binding protein
MtrunA17_Chr6g0453141	Medtr6g011870	0	#N/A	0	#N/A	0	#N/A	-1.91642	2.44573e-05	2	Putative chlorophyll A-B binding protein
MtrunA17_Chr6g0453181	Medtr6g012110	0	#N/A	0	#N/A	0	#N/A	-2.21978	1.85465e-06	2	Putative chlorophyll A-B binding protein
MtrunA17_Chr8g0382991	#N/A	0	#N/A	-1.31852	1.04562e-11	-0.992695	2.65663e-07	-1.022	2.08011e-07	2	Putative chlorophyll A-B binding protein
MtrunA17_Chr6g0453151	#N/A	0	#N/A	0	#N/A	0	#N/A	-1.42928	0.000460666	2	Putative chlorophyll A-B binding protein
MtrunA17_Chr6g0453161	#N/A	0	#N/A	0	#N/A	0	#N/A	-1.56075	9.97973e-05	2	Putative chlorophyll A-B binding protein
MtrunA17_Chr1g0166371	Medtr1g041390	0	#N/A	0	#N/A	0	#N/A	-1.34832	8.64642e-05	2	Putative chlorophyllase
MtrunA17_Chr8g0369021	Medtr8g070690	0	#N/A	0	#N/A	-1.56919	6.167e-05	-1.13864	0.00667734	2	Putative chloroplast enhancing stress tolerance protein
MtrunA17_Chr2g0296511	#N/A	0	#N/A	-1.02042	0.00357026	-1.39305	1.48913e-05	-0.768348	0.0300808	2	Putative chloroplast enhancing stress tolerance protein
MtrunA17_Chr4g0012511	Medtr4g027040	0	#N/A	-0.863135	6.12252e-05	-1.0094	8.16659e-07	-0.543553	0.0162106	2	Putative chromatin regulator PHD family
MtrunA17_Chr8g0369171	Medtr8g070830	-0.523543	0.0112498	-0.59328	0.00145602	-0.405441	0.028045	-1.10624	1.68462e-10	2	Putative CidB/LrgB family protein
MtrunA17_Chr5g0411841	Medtr5g031250	0	#N/A	-0.817753	0.0209985	-1.22738	0.000114958	-1.44392	7.91407e-06	2	Putative cinnamyl-alcohol dehydrogenase
MtrunA17_Chr5g0411851	Medtr5g031290	0	#N/A	0	#N/A	-1.31496	6.54011e-05	0.748019	0.0448082	2	Putative cinnamyl-alcohol dehydrogenase
MtrunA17_Chr2g0305491	#N/A	-1.05341	5.05405e-06	-0.545148	0.0239923	0	#N/A	-1.40439	4.80199e-11	2	Putative clustered mitochondria protein
MtrunA17_Chr7g0239111	Medtr7g062580	0	#N/A	0	#N/A	-1.26225	0.00138842	0	#N/A	2	Putative codeine 3-O-demethylase
MtrunA17_Chr8g0370711	Medtr8g074050	0	#N/A	0	#N/A	0	#N/A	-1.24419	6.46817e-08	2	Putative codeine 3-O-demethylase
MtrunA17_Chr8g0370721	Medtr8g074070	0	#N/A	0	#N/A	0	#N/A	-2.98676	1.08538e-11	2	Putative codeine 3-O-demethylase
MtrunA17_Chr5g0430131	Medtr5g070920	0	#N/A	0	#N/A	0	#N/A	-1.56498	4.51619e-07	2	Putative costunolide synthase
MtrunA17_Chr1g0183881	Medtr1g069915	-0.985501	0.0427429	-1.34216	2.13569e-05	-0.800687	0.00870715	-1.68763	9.95007e-09	2	Putative CRAL-TRIO lipid binding domain, CRAL/TRIO domain, CRAL/TRIO domain superfamily
MtrunA17_Chr8g0385691	Medtr8g096180	0	#N/A	0	#N/A	0	#N/A	-1.32391	0.000434558	2	Putative CRAL-TRIO lipid binding domain, CRAL/TRIO domain, CRAL/TRIO domain superfamily
MtrunA17_Chr5g0398351	#N/A	-1.07491	0.00557584	0	#N/A	0	#N/A	-1.27636	5.95499e-05	2	Putative cucumisin
MtrunA17_Chr7g0276381	Medtr7g118290	0	#N/A	0	#N/A	0	#N/A	-1.30634	1.09864e-07	2	Putative cyanobacterial aminoacyl-tRNA synthetase, CAAD domain, protein CURVATURE THYLAKOID 1
MtrunA17_Chr8g0345861	Medtr8g024180	0	#N/A	0	#N/A	0	#N/A	-3.15077	4.7268e-12	2	Putative cyanobacterial aminoacyl-tRNA synthetase, CAAD domain, protein CURVATURE THYLAKOID 1
MtrunA17_Chr2g0322921	Medtr2g088860	0	#N/A	-2.02719	5.81067e-12	-1.31675	6.96838e-06	-2.18353	2.19756e-13	2	Putative cyclin PHO80, Cyclin-like superfamily	MtCycU1-1	Cyclin U type
MtrunA17_Chr6g0488531	Medtr6g092660	0	#N/A	-0.594799	6.67888e-05	-1.00368	4.79245e-13	0	#N/A	2	Putative cytidine deaminase
MtrunA17_Chr7g0234191	Medtr7g051910	-0.510102	0.00404828	-0.486063	0.00312094	-1.2624	2.80308e-18	-0.470908	0.0029203	2	Putative cytochrome b561 and DOMON domain-containing protein
MtrunA17_Chr7g0249821	Medtr7g080793	0	#N/A	-0.582251	0.00382619	0	#N/A	-1.05912	9.44533e-09	2	Putative cytochrome c, class IA/ IB, cytochrome c-like domain superfamily
MtrunA17_Chr6g0472311	Medtr0022s0290	0	#N/A	0	#N/A	0	#N/A	-1.86744	8.4063e-08	2	Putative cytochrome P450
MtrunA17_Chr1g0207841	Medtr1g107300	0	#N/A	-2.17156	1.36808e-08	-2.41466	1.1063e-10	-1.0337	0.0102614	2	Putative cytochrome P450
MtrunA17_Chr2g0280001	Medtr2g010250	-1.18061	0.000126733	-1.00747	0.000193136	-0.598435	0.026933	-2.03913	5.04953e-15	2	Putative cytochrome P450
MtrunA17_Chr2g0280011	Medtr2g010250	-1.04892	0.00461679	-0.917885	0.00596374	0	#N/A	-1.95078	2.70982e-10	2	Putative cytochrome P450
MtrunA17_Chr3g0101721	Medtr3g058210	-0.617322	0.0170823	-1.06503	8.14253e-07	-1.57676	2.62704e-14	0	#N/A	2	Putative cytochrome P450
MtrunA17_Chr4g0030701	Medtr4g062500	0	#N/A	0	#N/A	-1.08856	0.00369852	0	#N/A	2	Putative cytochrome P450
MtrunA17_Chr4g0047691	Medtr4g089055	0	#N/A	-0.603328	0.00186706	0	#N/A	-1.3316	1.03018e-13	2	Putative cytochrome P450
MtrunA17_Chr5g0406651	Medtr5g023680	-0.837428	0.042615	-1.35723	7.68083e-05	-0.918373	0.00680753	-2.12286	1.03327e-10	2	Putative cytochrome P450
MtrunA17_Chr7g0255131	Medtr7g088330	-0.706193	0.0073508	-0.639998	0.00814923	-0.567265	0.0135167	-1.09414	5.83439e-07	2	Putative cytochrome P450
MtrunA17_Chr8g0351801	Medtr8g036185	-0.72409	2.28791e-07	-1.02286	6.26476e-16	-0.836298	2.51571e-11	-0.343573	0.014535	2	Putative cytochrome P450
MtrunA17_Chr8g0380471	#N/A	-0.547409	0.00638269	-0.828301	6.20111e-07	-0.68424	2.76958e-05	-1.12858	3.57768e-12	2	Putative cytochrome P450
MtrunA17_Chr8g0357421	#N/A	-0.63928	0.0020271	-0.964563	1.03363e-07	-1.2531	6.29828e-13	-0.609685	0.00122361	2	Putative cytochrome P450
MtrunA17_Chr5g0423621	#N/A	0	#N/A	-0.860256	0.00014732	-1.31589	3.27463e-10	-0.532662	0.0262645	2	Putative cytochrome P450
MtrunA17_Chr8g0336851	Medtr8g009160	0	#N/A	0	#N/A	0	#N/A	-1.85353	4.89935e-06	2	Putative deacetoxyvindoline 4-hydroxylase
MtrunA17_Chr7g0236861	Medtr7g057180	-1.86184	8.95479e-08	-1.40971	3.94715e-06	-0.916947	0.00287224	-2.26322	5.86046e-14	2	Putative DedA family protein
MtrunA17_Chr3g0138841	Medtr3g108700	-0.337521	0.0347517	-1.03205	1.17948e-16	-0.937202	2.79572e-14	-0.502793	0.000142936	2	Putative deoxyribodipyrimidine photo-lyase
MtrunA17_Chr5g0398681	Medtr5g011780	0	#N/A	-1.48869	3.92776e-20	-1.47228	2.93226e-20	-0.633323	0.000210862	2	Putative deoxyribodipyrimidine photo-lyase
MtrunA17_Chr5g0398691	#N/A	0	#N/A	-1.64768	5.81699e-12	-1.5906	7.82922e-12	-0.655224	0.00990308	2	Putative deoxyribodipyrimidine photo-lyase
MtrunA17_Chr7g0273621	Medtr7g114340	-0.45723	0.00667151	-0.865363	6.15028e-10	-0.761413	3.26112e-08	-1.00216	5.83453e-13	2	Putative diacylglycerol acyltransferase, serine aminopeptidase, S33, alpha/Beta hydrolase
MtrunA17_Chr2g0287281	Medtr2g021340	0	#N/A	-1.07105	3.05481e-05	-1.22652	4.9605e-07	-0.991775	0.000124509	2	Putative dienelactone hydrolase, alpha/Beta hydrolase
MtrunA17_Chr3g0085321	#N/A	0	#N/A	-0.879825	0.000180248	-1.92537	1.11971e-18	-0.746057	0.00152456	2	Putative dirigent protein
MtrunA17_Chr3g0085311	#N/A	-0.744877	0.00151183	-1.04663	5.5171e-07	-1.59432	1.74681e-15	-0.609648	0.00575866	2	Putative dirigent protein
MtrunA17_Chr6g0465111	Medtr6g038640	0	#N/A	0	#N/A	-0.909875	0.0186916	-1.85451	2.60493e-06	2	Putative D-xylose 1-dehydrogenase (NADP(+))
MtrunA17_Chr1g0171301	Medtr1g051120	0	#N/A	0	#N/A	-1.00453	2.80834e-08	-0.660035	0.000365225	2	Putative EamA domain-containing protein
MtrunA17_Chr1g0186601	Medtr1g074070	0	#N/A	0	#N/A	-1.63516	3.47186e-07	-1.35059	5.2362e-05	2	Putative EamA domain-containing protein
MtrunA17_Chr4g0073241	Medtr4g129650	0	#N/A	0	#N/A	0	#N/A	-1.11802	6.20052e-06	2	Putative EamA domain-containing protein
MtrunA17_Chr3g0139581	Medtr3g110008	0	#N/A	-1.24886	0.000911656	-1.02883	0.00697616	0	#N/A	2	Putative EF-hand domain pair protein CML
MtrunA17_Chr4g0056581	Medtr4g101740	-1.39848	5.89229e-07	-1.16242	1.00849e-05	-0.969377	0.000172009	-1.70104	2.86728e-11	2	Putative elongation factor G, domain III, EF-G domain III/V, elongation Factor G, domain II
MtrunA17_Chr6g0452181	Medtr6g009260	0	#N/A	0	#N/A	0	#N/A	-1.45866	0.000863736	2	Putative endonuclease/exonuclease/phosphatase
MtrunA17_Chr8g0382571	Medtr8g091360	-1.49068	1.97626e-07	-0.870789	0.0023707	0	#N/A	0	#N/A	2	Putative endonuclease/exonuclease/phosphatase
MtrunA17_Chr3g0142061	Medtr3g112420	-0.512835	0.00614108	-0.653145	7.5989e-05	-0.406888	0.0146215	-1.05303	2.08602e-11	2	Putative endopeptidase La
MtrunA17_Chr2g0293681	Medtr2g032710	0	#N/A	0	#N/A	-1.09108	0.00168061	0	#N/A	2	Putative endo-polygalacturonase
MtrunA17_Chr4g0052621	Medtr4g094715	0	#N/A	0	#N/A	-1.3794	1.96664e-05	0	#N/A	2	Putative endo-polygalacturonase
MtrunA17_Chr5g0413411	Medtr5g034090	0	#N/A	0	#N/A	-1.55449	8.45571e-05	0	#N/A	2	Putative endo-polygalacturonase
MtrunA17_Chr3g0130391	Medtr3g096500	-0.513989	0.0170386	-0.6584	0.000505155	-1.00681	8.76038e-09	-1.31489	2.85806e-13	2	Putative ent-kaurene synthase	MtGA20ox5	Gibberellin 20 oxidase;gibberellin biosynthesis
MtrunA17_Chr3g0142691	Medtr3g113920	-1.28427	6.58455e-11	0	#N/A	0	#N/A	0	#N/A	2	Putative ER lumen protein retaining receptor
MtrunA17_Chr4g0041041	Medtr4g079750	0	#N/A	-0.462897	0.03083	0	#N/A	-1.0435	3.0433e-08	2	Putative erythromycin 3''-O-methyltransferase
MtrunA17_Chr1g0177671	Medtr1g057560	0	#N/A	0	#N/A	0	#N/A	-1.10251	6.21215e-06	2	Putative exocyst complex component Exo70, cullin repeat-like-containing domain superfamily
MtrunA17_Chr2g0324201	Medtr2g090265	0	#N/A	0	#N/A	-1.10186	0.00212468	0	#N/A	2	Putative expansin/Lol pI, expansin, cellulose-binding-like domain superfamily
MtrunA17_Chr2g0324221	Medtr2g090270	-1.0113	0.0281732	0	#N/A	-1.20645	0.00200898	0	#N/A	2	Putative expansin/Lol pI, expansin, cellulose-binding-like domain superfamily
MtrunA17_Chr4g0042521	Medtr4g081950	-1.15443	0.00180605	0	#N/A	0	#N/A	0	#N/A	2	Putative expansin/Lol pI, expansin, cellulose-binding-like domain superfamily
MtrunA17_Chr5g0417701	Medtr5g041700	-0.643814	0.0098348	-0.518156	0.0308953	-1.30895	1.84446e-10	-1.00505	2.42175e-06	2	Putative expansin/Lol pI, expansin, cellulose-binding-like domain superfamily
MtrunA17_Chr5g0399661	Medtr5g013250	0	#N/A	-1.3971	1.33037e-18	-1.36294	2.99787e-18	-1.09237	1.08538e-11	2	Putative FAD-binding domain, FAD/NAD(P)-binding domain superfamily
MtrunA17_Chr8g0337081	Medtr8g009560	-1.78571	2.01338e-07	-1.13745	0.000889568	-1.49738	5.54141e-06	0	#N/A	2	Putative fatty acid hydroxylase
MtrunA17_Chr4g0073231	Medtr4g129630	0	#N/A	0	#N/A	0	#N/A	-1.59481	0.00120189	2	Putative fatty acid hydroxylase, NAD(P)-binding domain superfamily	MtCER3	ECERIFERUM 3 (suberin biosynthesis)
MtrunA17_Chr2g0313941	Medtr2g072530	0	#N/A	-1.05844	3.50549e-06	-1.80135	1.13081e-16	0	#N/A	2	Putative FBD domain, leucine-rich repeat domain superfamily, F-box-like domain superfamily
MtrunA17_Chr3g0133441	#N/A	0	#N/A	-1.52178	1.83394e-07	-0.981586	0.000779805	-1.86763	5.69682e-10	2	Putative F-box domain, galactose oxidase/kelch, beta-propeller, F-box associated interaction
MtrunA17_Chr3g0138981	Medtr3g108860	0	#N/A	-0.642345	0.00507792	-0.452062	0.0446059	-1.0489	8.36488e-07	2	Putative F-box domain, kelch-type beta propeller
MtrunA17_Chr1g0150401	Medtr1g013580	0	#N/A	0	#N/A	0.624372	0.0356802	-1.1489	4.22981e-05	2	Putative F-box domain, leucine-rich repeat domain superfamily, F-box-like domain superfamily
MtrunA17_Chr2g0287071	Medtr2g021150	0	#N/A	-1.19304	3.28065e-06	0	#N/A	-1.11132	1.2239e-05	2	Putative F-box domain-containing protein
MtrunA17_Chr4g0008641	Medtr4g019560	0	#N/A	-0.66572	0.00523314	-1.60004	4.37063e-14	0	#N/A	2	Putative F-box domain-containing protein
MtrunA17_Chr2g0291481	Medtr2g028530	-1.09934	3.02268e-09	-0.706939	7.21165e-05	-0.513882	0.00352039	-0.996154	4.38538e-09	2	Putative ferric-chelate reductase (NADH)
MtrunA17_Chr1g0162361	Medtr1g034140	0	#N/A	0	#N/A	-1.23504	1.12586e-06	-0.553339	0.0478881	2	Putative flavanone 3-dioxygenase	MtGAOL3	Gibberellin-oxidase like 3
MtrunA17_Chr3g0102041	Medtr3g058610	0	#N/A	0	#N/A	0	#N/A	-1.13275	1.08427e-07	2	Putative flavanone 3-dioxygenase
MtrunA17_Chr8g0371921	Medtr8g075830	0	#N/A	-0.511708	0.045986	-1.14783	1.59215e-07	0	#N/A	2	Putative flavanone 3-dioxygenase
MtrunA17_Chr7g0241071	Medtr7g066120	-0.736049	0.00504835	-0.754705	0.00181845	0	#N/A	-1.85785	2.19074e-16	2	Putative fructose-bisphosphatase
MtrunA17_Chr6g0463901	Medtr6g035305	0	#N/A	0	#N/A	0	#N/A	-1.21177	2.9518e-07	2	Putative fructose-bisphosphatase transcription factor C3H family
MtrunA17_Chr4g0028361	Medtr4g057670	-1.38367	3.09725e-11	-0.717355	0.000822011	0	#N/A	-1.28685	1.66631e-10	2	Putative fructose-bisphosphate aldolase
MtrunA17_Chr4g0035951	Medtr4g071860	-1.23755	9.42136e-12	-0.872252	1.09141e-06	-0.62328	0.000505979	-1.38635	2.86319e-15	2	Putative fructose-bisphosphate aldolase
MtrunA17_Chr4g0035981	Medtr4g071880	0	#N/A	-1.50836	4.40094e-06	-1.66482	1.31588e-07	-2.54499	4.93283e-15	2	Putative fructose-bisphosphate aldolase
MtrunA17_Chr4g0035971	#N/A	0	#N/A	-1.61184	4.14341e-07	-1.42737	2.9695e-06	-2.03996	2.87469e-11	2	Putative fructose-bisphosphate aldolase
MtrunA17_Chr6g0449521	Medtr6g004880	-1.45846	3.08102e-07	0	#N/A	0	#N/A	0	#N/A	2	Putative galactinol--sucrose galactosyltransferase
MtrunA17_Chr6g0461551	Medtr6g032880	-1.00004	0.000233727	0	#N/A	0	#N/A	-1.41405	7.34191e-09	2	Putative galactose mutarotase-like domain superfamily
MtrunA17_Chr7g0253181	Medtr7g085490	-1.03188	0.000151748	-0.675164	0.0130025	0	#N/A	-1.69026	4.81892e-12	2	Putative galactose mutarotase-like domain superfamily
MtrunA17_Chr1g0155971	Medtr1g023570	0	#N/A	-1.82911	0.00108003	-2.80204	1.95085e-07	-4.14546	1.50037e-12	2	Putative galactose oxidase
MtrunA17_Chr4g0008611	Medtr4g019520	0	#N/A	-1.03997	3.86996e-13	-0.818191	1.45577e-08	-0.499209	0.00135162	2	Putative galactose oxidase
MtrunA17_Chr3g0128821	Medtr3g094080	-0.865638	0.00313769	-2.23052	2.12997e-19	-2.07398	1.79356e-17	-2.0206	8.66007e-16	2	Putative GATA-type transcription activator
MtrunA17_Chr8g0349331	Medtr8g031420	0	#N/A	0	#N/A	-1.02407	0.00894124	-0.971924	0.0170163	2	Putative GDSL lipase/esterase, SGNH hydrolase superfamily
MtrunA17_Chr5g0397071	Medtr5g009810	-0.939465	6.23111e-05	-0.504424	0.0381345	-0.459752	0.043166	-1.24253	5.49424e-09	2	Putative Gdt1 family protein
MtrunA17_Chr7g0246131	Medtr7g075390	0	#N/A	-1.72141	2.46954e-07	-1.63034	5.31788e-07	-1.43318	1.8211e-05	2	Putative geraniol 8-hydroxylase
MtrunA17_Chr8g0343934	#N/A	0	#N/A	-1.1423	0.00015893	-1.1075	0.000141758	-1.31223	8.36557e-06	2	Putative germin, rmlC-like cupin domain superfamily, rmlC-like jelly roll
MtrunA17_Chr2g0332191	Medtr2g102570	-0.737867	0.00460248	-1.72736	4.11785e-15	-2.25063	8.07116e-25	-1.44559	8.89336e-11	2	Putative gibberellin 3-beta-dioxygenase	MtGA3ox1; MtSSL	GIBBERELLIN 3-OXIDASE 1 (Gibberellin biosynthesis); SMALL AND SERRATED LEAF
MtrunA17_Chr4g0059421	Medtr4g106860	1.29008	0.0235588	0	#N/A	0	#N/A	-1.42025	0.00470544	2	Putative gibberellin regulated protein	MtGASA11	Gibberellic Acid-Stimulated in Arabidopsis
MtrunA17_Chr6g0474391	Medtr6g464620	0.738908	0.0274168	0	#N/A	-1.0757	2.23983e-05	-0.71354	0.00854937	2	Putative gibberellin-44 dioxygenase	MtGA20ox1	Gibberellin 20 oxidase (gibberellin biosynthesis)
MtrunA17_Chr3g0121271	Medtr3g083580	0	#N/A	0	#N/A	-1.0439	3.59026e-06	0	#N/A	2	Putative glucan endo-1,3-beta-D-glucosidase	MtBG2	beta-1,3-Glucanase 2
MtrunA17_Chr1g0179381	Medtr1g061270	0	#N/A	0	#N/A	-1.06521	2.2264e-05	0	#N/A	2	Putative glucomannan 4-beta-mannosyltransferase
MtrunA17_Chr1g0152491	Medtr1g018030	0	#N/A	-0.980078	0.000140636	-0.746892	0.00314221	-1.52321	5.9633e-10	2	Putative glucosamine-phosphate N-acetyltransferase transcription regulator GNAT family
MtrunA17_Chr4g0074531	Medtr4g131760	-1.15964	0.00212414	-1.25313	0.000297593	-0.925168	0.00642248	-2.43726	3.3204e-13	2	Putative glucose-1-phosphate adenylyltransferase
MtrunA17_Chr2g0330251	Medtr2g100070	0	#N/A	0	#N/A	-0.533207	0.0132116	-1.36359	3.45805e-11	2	Putative glucose-methanol-choline oxidoreductase, FAD/NAD(P)-binding domain superfamily
MtrunA17_Chr8g0388481	Medtr8g099665	0	#N/A	-1.32834	2.77982e-16	-0.992046	8.26813e-10	-1.15418	2.9412e-12	2	Putative glutaredoxin, Thioredoxin-like superfamily
MtrunA17_Chr1g0195811	Medtr1g088840	0	#N/A	0	#N/A	-1.17811	1.0274e-12	-1.39199	3.02468e-16	2	Putative glutathione transferase
MtrunA17_Chr2g0312681	Medtr2g070060	-0.706647	0.00431167	-0.805264	0.000310934	0	#N/A	-1.52944	5.00336e-13	2	Putative glutathione transferase
MtrunA17_Chr2g0312751	Medtr2g070140	-0.475529	0.0308891	-0.708685	0.000157545	-0.663048	0.000252383	-1.29346	4.80085e-13	2	Putative glutathione transferase
MtrunA17_Chr4g0008791	Medtr4g019790	-1.01781	0.000648586	-0.933346	0.000851633	-1.25379	1.44694e-06	0	#N/A	2	Putative glutathione transferase
MtrunA17_Chr7g0240561	Medtr7g065590	0	#N/A	0	#N/A	-0.667961	0.000460852	-1.28959	5.98976e-12	2	Putative glutathione transferase
MtrunA17_Chr7g0240631	Medtr7g065640	0	#N/A	-0.583523	0.00805089	-0.918699	3.51086e-06	-1.55427	7.86031e-15	2	Putative glutathione transferase
MtrunA17_Chr7g0240691	#N/A	0	#N/A	0	#N/A	-1.17693	0.00274804	-3.1191	2.08708e-14	2	Putative glutathione transferase
MtrunA17_Chr3g0144151	Medtr3g115920	-0.687402	0.000231354	-0.472318	0.0114671	0	#N/A	-1.08852	7.71146e-11	2	Putative glyceraldehyde-3-phosphate dehydrogenase (NADP(+)) (phosphorylating)
MtrunA17_Chr7g0257111	Medtr7g090970	-1.15543	1.08628e-10	0	#N/A	0.435885	0.0141657	0	#N/A	2	Putative glycerol-3-phosphate dehydrogenase (NAD(+))
MtrunA17_Chr4g0036991	Medtr4g073220	-1.02868	2.03798e-07	0	#N/A	0.496403	0.00697375	-0.589065	0.00155124	2	Putative glycerophosphodiester phosphodiesterase, protein kinase RLK-Pelle-LRK10L-2 family
MtrunA17_Chr5g0400431	Medtr5g014260	0	#N/A	-0.596456	0.0214073	0	#N/A	-1.6701	4.36222e-13	2	Putative glycine cleavage system H-protein/Simiate
MtrunA17_Chr3g0115291	Medtr3g073470	0	#N/A	-0.590181	0.000371643	-1.47688	8.77853e-23	-1.00226	1.16426e-10	2	Putative glycine hydroxymethyltransferase
MtrunA17_Chr5g0438501	Medtr5g084540	0	#N/A	0	#N/A	0	#N/A	-2.12307	0.00225694	2	Putative glycine rich protein
MtrunA17_Chr5g0438511	Medtr5g084570	0	#N/A	0	#N/A	1.16506	0.0245413	-3.15221	1.33376e-09	2	Putative glycine rich protein
MtrunA17_Chr4g0043041	Medtr4g082950	0	#N/A	0	#N/A	0	#N/A	-1.09918	0.000152112	2	Putative glycogen phosphorylase
MtrunA17_Chr7g0234111	Medtr7g051610	-1.39921	0.000140018	-1.33274	0.000119185	-1.58001	1.63007e-06	-1.29591	0.00015306	2	Putative glycosidase
MtrunA17_Chr7g0234131	Medtr7g051650	-1.10014	5.27757e-08	-0.795724	6.20865e-05	-0.70855	0.000249273	0	#N/A	2	Putative glycosidase
MtrunA17_Chr8g0381451	Medtr8g089740	0	#N/A	-0.689124	0.0142551	-0.8042	0.00220481	-1.20594	1.06717e-05	2	Putative glycoside hydrolase, family 27, glycosyl hydrolase, all-beta, aldolase-type TIM barrel
MtrunA17_Chr4g0000581	Medtr4g006010	0	#N/A	-0.606265	0.0108651	-1.31084	3.58076e-10	0	#N/A	2	Putative glycosyltransferase
MtrunA17_Chr7g0260361	Medtr7g095690	0	#N/A	-0.899905	2.97097e-08	-1.1718	5.05667e-14	-0.436447	0.0124431	2	Putative GOLD domain superfamily protein
MtrunA17_Chr1g0190971	Medtr1g081420	0	#N/A	-1.03627	0.000398005	-1.45744	9.15624e-08	-2.65687	2.52703e-19	2	Putative guanine deaminase
MtrunA17_Chr4g0033511	Medtr4g067150	-0.602115	0.0141187	-0.878516	3.41408e-05	-0.881862	1.58735e-05	-1.52917	8.81371e-14	2	Putative GUN4-like superfamily protein
MtrunA17_Chr4g0057421	Medtr4g103330	-0.498133	0.0184886	-0.563717	0.00295093	-0.450292	0.0142638	-1.20602	4.35066e-12	2	Putative H(+)-transporting two-sector ATPase
MtrunA17_Chr2g0288451	#N/A	0	#N/A	-0.713693	0.00182983	0	#N/A	-1.42886	1.9693e-11	2	Putative H(+)-transporting two-sector ATPase
MtrunA17_Chr7g0247911	Medtr7g077880	-1.34114	0.013773	-1.54739	0.00156183	0	#N/A	-2.52269	7.18853e-08	2	Putative HAD-like superfamily protein
MtrunA17_Chr3g0077841	#N/A	0	#N/A	-0.462899	0.0287148	-1.01397	1.35789e-08	-0.412168	0.0418018	2	Putative Haem oxygenase HugZ-like superfamily
MtrunA17_Chr8g0337611	Medtr8g010120	-1.21087	4.20139e-08	-0.928184	8.78018e-06	-0.782041	0.000131964	-1.35821	2.0402e-11	2	Putative haloalkane dehalogenase
MtrunA17_Chr4g0031301	Medtr4g063710	0	#N/A	-0.902571	0.0117038	-1.49619	3.31979e-06	-1.02102	0.00277118	2	Putative Heat shock protein 70 family
MtrunA17_Chr4g0031321	Medtr4g063720	-0.615222	0.0447338	-1.05209	2.74393e-05	-1.25195	1.59194e-07	-1.1595	2.47043e-06	2	Putative Heat shock protein 70 family
MtrunA17_Chr4g0014501	Medtr4g032905	-0.905113	0.0116898	-0.813437	0.00735978	-0.571497	0.0481327	-1.77296	5.89622e-11	2	Putative Heat shock protein DnaJ, cysteine-rich domain superfamily
MtrunA17_Chr6g0469201	Medtr6g452990	0	#N/A	0	#N/A	-1.16148	0.000189928	0	#N/A	2	Putative Heat shock protein Hsp90 family
MtrunA17_Chr3g0115421	Medtr3g073670	-1.06553	1.80898e-07	-0.80365	3.81709e-05	-1.04888	1.25851e-08	-0.47271	0.0222987	2	Putative heavy metal-associated domain, HMA, heavy metal-associated domain superfamily
MtrunA17_Chr3g0132061	Medtr3g099040	0	#N/A	0	#N/A	0	#N/A	-1.32336	0.00132641	2	Putative heavy metal-associated domain, HMA, heavy metal-associated domain superfamily
MtrunA17_Chr8g0390711	Medtr8g103820	0	#N/A	0	#N/A	-1.4583	2.63751e-12	0	#N/A	2	Putative heavy metal-associated domain, HMA, heavy metal-associated domain superfamily
MtrunA17_Chr6g0469111	Medtr0057s0100	0	#N/A	-1.00443	6.40496e-05	0	#N/A	0	#N/A	2	Putative Hemopexin-like domain superfamily
MtrunA17_Chr6g0467741	Medtr6g045077	0	#N/A	0	#N/A	0	#N/A	-1.04206	0.00599172	2	Putative Hemopexin-like domain superfamily
MtrunA17_Chr8g0335161	Medtr8g006730	0	#N/A	-1.82975	5.17653e-06	-1.27713	0.00130722	-2.7976	3.33478e-12	2	Putative hydroquinone glucosyltransferase
MtrunA17_Chr7g0270281	Medtr7g109920	0	#N/A	-0.771218	0.00419156	-1.20276	9.62901e-07	0	#N/A	2	Putative inositol 3-alpha-galactosyltransferase
MtrunA17_Chr1g0193011	#N/A	-1.40531	0.0050313	0	#N/A	0	#N/A	0	#N/A	2	Putative inositol 3-alpha-galactosyltransferase
MtrunA17_Chr6g0467751	Medtr6g045087	-1.62392	0.000981684	1.59362	1.44783e-05	0.848049	0.0163758	0	#N/A	2	Putative ionotropic glutamate receptor, metazoa
MtrunA17_Chr8g0371131	Medtr8g074730	0	#N/A	0	#N/A	-1.13498	0.000546673	-0.897545	0.0111633	2	Putative IQ motif, EF-hand binding, P-loop containing nucleoside triphosphate hydrolase
MtrunA17_Chr4g0039031	Medtr4g076520	0	#N/A	-0.608542	0.00327671	-0.613264	0.00164785	-1.04827	3.41773e-08	2	Putative isochorismate synthase
MtrunA17_Chr7g0219101	Medtr7g013850	-0.368551	0.0141871	-0.760741	9.06908e-10	-1.22847	1.18011e-24	-0.780484	3.96065e-10	2	Putative isoflavone-7-O-beta-glucoside 6''-O-malonyltransferase
MtrunA17_Chr7g0238941	Medtr7g062250	0	#N/A	0	#N/A	-1.12316	0.00671249	0	#N/A	2	Putative laccase
MtrunA17_Chr7g0240971	Medtr7g065970	0	#N/A	0	#N/A	0	#N/A	-1.32116	2.10595e-06	2	Putative laccase
MtrunA17_Chr3g0140091	Medtr3g110185	-0.767917	0.0405629	-0.764867	0.0185351	-0.661253	0.0297441	-1.65248	1.27203e-08	2	Putative lactoylglutathione lyase
MtrunA17_Chr4g0043261	Medtr4g083210	-1.3395	5.79738e-09	-1.02185	2.79078e-07	-0.81961	3.26333e-05	0	#N/A	2	Putative L-ascorbate oxidase
MtrunA17_Chr3g0118351	#N/A	0	#N/A	0	#N/A	-1.21058	0.000130588	0	#N/A	2	Putative L-ascorbate oxidase
MtrunA17_Chr1g0188801	Medtr1g077560	0	#N/A	-1.28113	1.33691e-08	-0.603031	0.0156184	0	#N/A	2	Putative Late embryogenesis abundant protein, LEA_2 subgroup
MtrunA17_Chr1g0172161	Medtr0783s0010	0	#N/A	0	#N/A	0	#N/A	-1.52509	6.05533e-08	2	Putative leucine-rich repeat domain superfamily
MtrunA17_Chr4g0000471	Medtr4g005810	0	#N/A	-0.626655	0.000503426	-1.37813	2.85294e-18	-0.827813	5.81223e-07	2	Putative leucine-rich repeat domain superfamily
MtrunA17_Chr7g0214721	Medtr7g006450	0	#N/A	0	#N/A	-1.22621	0.00327193	0	#N/A	2	Putative leucine--tRNA ligase
MtrunA17_Chr3g0115511	Medtr3g073820	0	#N/A	0	#N/A	-1.18171	0.000993566	-1.12883	0.00317412	2	Putative ligase
MtrunA17_Chr3g0118641	Medtr3g079450	-1.42588	5.37493e-09	-1.96664	1.44794e-17	-0.56054	0.0234499	0	#N/A	2	Putative linoleate 13S-lipoxygenase
MtrunA17_Chr8g0368831	Medtr8g070015	0	#N/A	0	#N/A	-1.3628	0.00230932	0	#N/A	2	Putative lipid-transfer protein DIR1
MtrunA17_Chr3g0121931	Medtr3g084450	0	#N/A	0	#N/A	0	#N/A	-1.75651	5.32928e-06	2	Putative long-chain-fatty-acid--[acyl-carrier-protein] ligase
MtrunA17_Chr6g0451711	Medtr6g008560	0	#N/A	0	#N/A	-1.0693	0.000535745	0	#N/A	2	Putative lyase	MtTPS13	terpene synthase 13
MtrunA17_Chr2g0332581	Medtr2g103140	-0.860259	0.00140724	0	#N/A	-1.11598	1.01533e-06	-0.649084	0.00883096	2	Putative lysophospholipase
MtrunA17_Chr3g0080421	Medtr3g010820	0	#N/A	0	#N/A	-0.767337	1.6886e-05	-1.08894	1.51054e-09	2	Putative major facilitator superfamily, MFS transporter superfamily
MtrunA17_Chr7g0247871	Medtr7g077830	-1.52424	8.65135e-19	-1.21042	1.08851e-13	-1.05503	6.01444e-11	-1.1407	4.99172e-12	2	Putative major facilitator superfamily, MFS transporter superfamily
MtrunA17_Chr8g0354831	Medtr8g042770	0	#N/A	0	#N/A	-1.00112	0.000189928	-0.932903	0.000971708	2	Putative major facilitator superfamily, MFS transporter superfamily
MtrunA17_Chr3g0115721	Medtr3g074360	-1.85902	2.29837e-05	0	#N/A	0	#N/A	0	#N/A	2	Putative major facilitator, sugar transporter, major facilitator superfamily
MtrunA17_Chr6g0485661	Medtr6g088450	0	#N/A	-0.537736	0.0483088	0	#N/A	-1.1282	2.32237e-06	2	Putative major facilitator, sugar transporter, major facilitator superfamily	MtPMT6_3	Myo-inositol transporter, polyol transporter 5
MtrunA17_Chr2g0333771	Medtr2g104940	-1.51526	1.29576e-14	-1.0243	2.34067e-08	-1.22186	4.00547e-12	-0.570763	0.00274883	2	Putative major intrinsic protein	MtNIP4	NOD26-like intrinsic protein 4 (aquaporin;AY605123)
MtrunA17_Chr4g0001221	Medtr4g006730	0	#N/A	0	#N/A	-1.03333	0.000796292	0	#N/A	2	Putative major intrinsic protein	MtNIP3	NOD26-like intrinsic protein 3 (aquaporin, AY539749)
MtrunA17_Chr4g0024851	Medtr4g049340	-0.780338	0.00908265	-0.863485	0.000760404	-1.01473	2.25652e-05	-1.72492	6.3614e-13	2	Putative major intrinsic protein
MtrunA17_Chr4g0030861	Medtr4g063090	-1.60329	1.85722e-06	-0.889563	0.00805704	0	#N/A	-0.691237	0.0420327	2	Putative major intrinsic protein	MtTIP1g	tonoplast intrinsic protein 1f (aquaporin)
MtrunA17_Chr4g0049321	Medtr4g092690	-0.642449	0.00504835	-0.753854	0.000268827	0	#N/A	-1.10083	2.35899e-08	2	Putative malate dehydrogenase
MtrunA17_Chr4g0069201	Medtr4g123810	0	#N/A	0	#N/A	-0.921734	1.65287e-10	-1.00951	8.63466e-12	2	Putative methionine adenosyltransferase
MtrunA17_Chr3g0141561	Medtr3g111840	0	#N/A	-1.50561	9.26206e-16	-1.35101	2.53959e-13	-1.17728	5.85473e-10	2	Putative methyltransferase Ppm1/Ppm2/Tcmp, S-adenosyl-L-methionine-dependent methyltransferase
MtrunA17_Chr6g0488521	Medtr6g092630	-1.32636	3.22149e-17	-0.803705	2.62041e-07	-0.764838	5.12583e-07	-1.04229	1.13153e-11	2	Putative methyltransferase type 11, S-adenosyl-L-methionine-dependent methyltransferase
MtrunA17_Chr7g0226681	Medtr7g032900	-0.433203	0.0428951	-0.695104	8.97703e-05	-0.737476	1.31925e-05	-1.13846	1.39062e-11	2	Putative methyltransferase type 11, S-adenosyl-L-methionine-dependent methyltransferase
MtrunA17_Chr8g0366791	Medtr8g066975	-0.706184	0.00121036	-0.569336	0.00580682	-0.423918	0.0347118	-1.00919	7.7645e-08	2	Putative mitochondrial carrier domain superfamily
MtrunA17_Chr4g0063561	Medtr4g114320	-1.04	0.0379445	-1.44816	0.000777241	-1.01827	0.0159972	-2.17245	1.32314e-07	2	Putative mitochondrial carrier protein
MtrunA17_Chr1g0148521	Medtr1g010270	-1.34069	0.00348159	0	#N/A	-1.00678	0.000983554	-1.01245	0.000924082	2	Putative molybdate transporter 1/2	MtMOT1.2	Molybdate transporter
MtrunA17_Chr5g0398551	Medtr5g011540	0	#N/A	-0.548613	0.0203115	-1.1197	5.18764e-08	0	#N/A	2	Putative multi antimicrobial extrusion protein	MtMATE48	multidrug and toxic compound extrusion family
MtrunA17_Chr4g0035811	#N/A	-0.88961	0.000427026	-0.538824	0.0252431	0	#N/A	-1.32795	3.34487e-10	2	Putative multi antimicrobial extrusion protein	MtMATE59	multidrug and toxic compound extrusion family
MtrunA17_Chr5g0402821	Medtr5g018260	0	#N/A	0	#N/A	0	#N/A	-1.23849	0.000269471	2	Putative Myb/SANT-like domain-containing protein
MtrunA17_Chr4g0032081	Medtr4g064750	0	#N/A	-0.582648	0.00361713	0	#N/A	-1.06765	6.82972e-09	2	Putative NAD(P)-binding domain, NAD(P)-binding domain superfamily
MtrunA17_Chr4g0034391	Medtr4g068970	0	#N/A	-0.675368	0.0212815	0	#N/A	-1.60276	9.5561e-10	2	Putative NAD(P)-binding domain, NAD(P)-binding domain superfamily
MtrunA17_Chr8g0376171	#N/A	0	#N/A	0	#N/A	0	#N/A	-1.67545	1.56445e-09	2	Putative NAD(P)H-quinone oxidoreductase subunit L
MtrunA17_Chr3g0130201	Medtr3g096290	-0.943465	0.00156123	-0.844493	0.00259898	-0.830915	0.00174179	-1.88737	5.79135e-13	2	Putative NAD(P)H-quinone oxidoreductase subunit O
MtrunA17_Chr3g0108631	Medtr3g062890	-1.37321	1.30148e-06	-0.734688	0.0103641	-0.673655	0.0127725	-1.61402	4.58965e-10	2	Putative NAD(P)H-quinone oxidoreductase, subunit N
MtrunA17_Chr1g0185571	Medtr1g072260	-0.808864	0.000432644	-0.827074	0.000113605	-0.467255	0.0324133	-1.35716	3.58639e-11	2	Putative NAD-dependent epimerase/dehydratase, NAD(P)-binding domain superfamily
MtrunA17_Chr7g0271591	Medtr7g111860	-1.18495	3.02632e-06	-0.805381	0.00135301	-0.555057	0.0253504	-1.82732	9.59994e-15	2	Putative NAD-dependent epimerase/dehydratase, NAD(P)-binding domain superfamily
MtrunA17_Chr8g0349971	Medtr8g032260	0	#N/A	-0.753644	0.00238334	0	#N/A	-1.30448	1.40506e-08	2	Putative NADH dehydrogenase-like complex, subunit S
MtrunA17_Chr2g0321641	Medtr2g086700	0	#N/A	-0.755785	0.0325754	-1.13938	0.0002289	-1.40753	9.79504e-06	2	Putative neoxanthin synthase
MtrunA17_Chr2g0291201	Medtr2g028190	0	#N/A	0	#N/A	0	#N/A	-2.11177	0.000595743	2	Putative nepenthesin
MtrunA17_Chr3g0099891	Medtr3g053710	0	#N/A	0	#N/A	-0.59439	0.00290185	-1.09361	2.94162e-08	2	Putative nepenthesin
MtrunA17_Chr1g0189961	Medtr1g079730	0	#N/A	-0.997701	3.48198e-08	-0.757479	2.63023e-05	-1.0676	4.15444e-09	2	Putative neprosin
MtrunA17_Chr5g0424491	Medtr5g059820	-1.00342	2.18944e-07	0	#N/A	0	#N/A	0.410772	0.0440552	2	Putative nitrate reductase (NADH)	MtNR2	nitrate reductase
MtrunA17_Chr1g0191111	Medtr1g081665	0	#N/A	-0.755369	0.00223318	-1.00808	7.46546e-06	-0.902164	4.55515e-05	2	Putative non-specific serine/threonine protein kinase
MtrunA17_Chr5g0439461	Medtr5g085920	0	#N/A	0	#N/A	0	#N/A	-1.10143	6.01795e-05	2	Putative non-specific serine/threonine protein kinase
MtrunA17_Chr4g0006861	#N/A	0	#N/A	0	#N/A	0.641008	0.00846608	-1.22205	1.75096e-07	2	Putative non-specific serine/threonine protein kinase
MtrunA17_Chr4g0003891	Medtr4g011530	0	#N/A	0	#N/A	-0.771967	0.00185237	-1.59335	4.91228e-11	2	Putative NPH3 domain-containing protein
MtrunA17_Chr1g0190931	Medtr1g081280	0	#N/A	-0.987584	2.90019e-06	-0.981225	9.95639e-07	-1.32173	2.43156e-11	2	Putative NTF2-like domain superfamily protein
MtrunA17_Chr2g0315601	Medtr2g076070	0	#N/A	-1.12899	0.0152496	0	#N/A	-1.64549	0.000224021	2	Putative NTF2-like domain superfamily protein
MtrunA17_Chr6g0483131	Medtr6g080430	0	#N/A	-1.36726	1.74695e-08	-1.22703	2.36493e-07	-0.830881	0.000955925	2	Putative NT-type C2 domain, protein PLASTID MOVEMENT IMPAIRED 1
MtrunA17_Chr5g0397611	#N/A	0	#N/A	0	#N/A	-1.31003	0.000679749	-1.74882	2.37556e-05	2	Putative nucleolar GTP-binding protein
MtrunA17_Chr4g0040221	Medtr4g078390	0	#N/A	0	#N/A	0	#N/A	-2.63104	8.75987e-07	2	Putative O-acyltransferase, WSD1, O-acyltransferase WSD1
MtrunA17_Chr4g0040261	Medtr4g078460	-1.5681	0.0248206	0	#N/A	0	#N/A	-2.71232	6.79952e-06	2	Putative O-acyltransferase, WSD1, O-acyltransferase WSD1
MtrunA17_Chr4g0040231	Medtr4g078600	0	#N/A	0	#N/A	0	#N/A	-1.83096	0.000151359	2	Putative O-acyltransferase, WSD1, O-acyltransferase WSD1
MtrunA17_Chr4g0062431	Medtr4g111770	-0.586448	0.0235588	-0.682557	0.000887977	-1.05437	1.84967e-08	0	#N/A	2	Putative oleosin
MtrunA17_Chr7g0257941	Medtr7g092240	0	#N/A	-0.7277	0.0383998	-2.23763	2.49063e-13	-2.26927	1.66962e-12	2	Putative oligopeptide transporter, OPT superfamily
MtrunA17_Chr7g0224391	Medtr7g027175	-1.83766	1.2693e-16	-1.24849	9.63053e-09	0	#N/A	0	#N/A	2	Putative omega-hydroxypalmitate O-feruloyl transferase
MtrunA17_Chr5g0432521	Medtr5g075190	0	#N/A	0	#N/A	-1.10154	1.4838e-06	0	#N/A	2	Putative ovate protein family
MtrunA17_Chr4g0026701	Medtr4g053880	-1.40165	0.000545202	0	#N/A	0	#N/A	0	#N/A	2	Putative oxidoreductase
MtrunA17_Chr7g0252641	Medtr7g084800	-0.640841	0.00137425	-0.487413	0.0132084	0	#N/A	-1.18222	1.66659e-11	2	Putative oxidoreductase
MtrunA17_Chr7g0268721	Medtr7g108210	-1.00076	0.00841404	0	#N/A	0.870989	0.0083361	0	#N/A	2	Putative oxidoreductase	Glutaredoxin-12	Glutaredoxin family protein
MtrunA17_Chr7g0270441	Medtr7g110130	0	#N/A	0	#N/A	0	#N/A	-1.08231	1.14657e-06	2	Putative oxidoreductase
MtrunA17_Chr1g0184111	Medtr1g070100	0	#N/A	0	#N/A	0	#N/A	-2.66173	1.25991e-07	2	Putative oxoglutarate/iron-dependent dioxygenase, non-haem dioxygenase domain-containing protein
MtrunA17_Chr4g0004061	Medtr4g011690	-0.690708	0.000969408	-0.797795	2.92548e-05	-1.10956	7.23291e-10	-0.635362	0.00105224	2	Putative oxoglutarate/iron-dependent dioxygenase, non-haem dioxygenase domain-containing protein
MtrunA17_Chr4g0004071	Medtr4g011720	-0.826519	8.13523e-07	-0.804773	4.12646e-07	-1.13023	1.00266e-13	-0.652974	5.1693e-05	2	Putative oxoglutarate/iron-dependent dioxygenase, non-haem dioxygenase domain-containing protein
MtrunA17_Chr4g0045411	Medtr4g087090	0	#N/A	0	#N/A	-0.930415	1.89618e-05	-1.03926	1.90981e-06	2	Putative oxoglutarate/iron-dependent dioxygenase, non-haem dioxygenase domain-containing protein	MtGAOL4	GA2-oxidase like 4
MtrunA17_Chr4g0045451	Medtr4g087120	0	#N/A	0	#N/A	-1.51727	1.59398e-15	0	#N/A	2	Putative oxoglutarate/iron-dependent dioxygenase, non-haem dioxygenase domain-containing protein	MtGAOL7	GA2-oxidase like 7
MtrunA17_Chr7g0256741	Medtr7g090520	-1.64585	3.95104e-05	-1.30448	0.000453726	-1.03097	0.00227798	0	#N/A	2	Putative oxoglutarate/iron-dependent dioxygenase, non-haem dioxygenase domain-containing protein
MtrunA17_Chr8g0351101	Medtr8g033380	0	#N/A	0	#N/A	-1.07195	0.00326822	-1.50967	6.35681e-05	2	Putative oxoglutarate/iron-dependent dioxygenase, non-haem dioxygenase domain-containing protein	MtGA20ox6	Gibberellin 20 oxidase (gibberellin biosynthesis)
MtrunA17_Chr2g0319281	Medtr2g082580	0	#N/A	-0.762335	0.00939509	-0.736321	0.00757555	-1.30013	1.1899e-06	2	Putative oxygen-evolving enhancer protein
MtrunA17_Chr5g0417771	Medtr5g041910	-0.974439	3.75913e-05	-0.535013	0.0284246	-0.503567	0.0265765	-1.28213	2.04048e-09	2	Putative oxygen-evolving enhancer protein
MtrunA17_Chr8g0380461	Medtr8g088420	-0.834973	1.38852e-05	-0.720735	8.36468e-05	-0.454923	0.0138165	-1.24245	1.34305e-12	2	Putative PDZ domain, tetratricopeptide-like helical domain superfamily, PDZ superfamily
MtrunA17_Chr1g0193381	Medtr1g085070	0	#N/A	-0.628604	0.00212839	-0.828772	1.14143e-05	-1.0579	2.85768e-08	2	Putative pectinacetylesterase/NOTUM
MtrunA17_Chr1g0192331	Medtr1g083520	0	#N/A	0	#N/A	-1.42424	0.000459311	-1.36326	0.00120458	2	Putative pectinesterase
MtrunA17_Chr8g0391291	Medtr8g104645	-1.98937	0.000515987	-1.66353	0.00103321	0	#N/A	1.28527	0.0145548	2	Putative pectinesterase
MtrunA17_Chr8g0391311	Medtr8g104655	-1.63361	0.000108428	-1.73952	9.76912e-06	-0.998832	0.0124276	0	#N/A	2	Putative pectinesterase
MtrunA17_Chr4g0056601	#N/A	0	#N/A	0	#N/A	0	#N/A	-1.05354	0.00119251	2	Putative pectinesterase
MtrunA17_Chr8g0387731	Medtr8g099160	-0.631816	0.000923264	-0.546438	0.00245321	-0.67878	4.79683e-05	-1.00388	1.76473e-09	2	Putative peptidase C45
MtrunA17_Chr8g0383001	#N/A	0	#N/A	0	#N/A	0	#N/A	-1.33665	1.6962e-08	2	Putative peptidase M41
MtrunA17_Chr1g0179681	Medtr1g061850	0	#N/A	-0.68597	0.00129556	-0.462356	0.0285302	-1.17768	2.99629e-09	2	Putative peptidylprolyl isomerase
MtrunA17_Chr3g0102841	Medtr3g060750	-0.497584	0.0419217	-0.718882	0.000531574	-0.427774	0.0408125	-1.1058	1.54168e-08	2	Putative peptidylprolyl isomerase
MtrunA17_Chr4g0052911	Medtr4g094785	-0.685713	0.000210104	-0.867296	1.58083e-07	-0.877483	4.75534e-08	-1.29724	1.72792e-15	2	Putative peptidylprolyl isomerase
MtrunA17_Chr4g0062381	Medtr4g111720	0	#N/A	0	#N/A	-0.594113	0.0499972	-1.33944	3.0425e-06	2	Putative peptidylprolyl isomerase
MtrunA17_Chr8g0359811	Medtr8g059435	-0.699607	0.000177611	-0.635146	0.000278643	-0.642295	0.000117265	-1.02964	5.27361e-10	2	Putative peptidylprolyl isomerase
MtrunA17_Chr8g0382711	Medtr8g091410	-1.24143	5.89229e-07	-0.801934	0.00104011	-0.591595	0.0138334	-1.40511	8.43491e-10	2	Putative peptidylprolyl isomerase
MtrunA17_Chr7g0255551	#N/A	0	#N/A	-1.18617	9.77929e-06	-1.00492	0.000127856	-1.42634	5.4782e-08	2	Putative peptidylprolyl isomerase
MtrunA17_Chr2g0291751	Medtr2g028980	0	#N/A	0	#N/A	-1.11356	0.00116524	0	#N/A	2	Putative peroxidase	MtPrx71	peroxidase
MtrunA17_Chr2g0292251	Medtr2g029830	0	#N/A	0	#N/A	-0.982116	0.000294995	-1.44964	1.0846e-07	2	Putative peroxidase	MtPrx20	peroxidase
MtrunA17_Chr3g0129051	Medtr3g094650	0	#N/A	0	#N/A	0	#N/A	-2.39856	1.35286e-05	2	Putative peroxidase	MtPrx54	peroxidase
MtrunA17_Chr4g0013191	Medtr4g029190	0	#N/A	0	#N/A	-1.02139	0.00239296	0	#N/A	2	Putative peroxidase	MtPrx32	peroxidase
MtrunA17_Chr4g0013201	Medtr4g029200	0	#N/A	0	#N/A	-1.13533	0.000591516	0	#N/A	2	Putative peroxidase	MtPrx24	peroxidase
MtrunA17_Chr5g0432341	Medtr5g074740	0	#N/A	0	#N/A	-1.21528	0.00135946	-1.00736	0.0116757	2	Putative peroxidase	MtPrx02	peroxidase
MtrunA17_Chr7g0263551	Medtr7g100540	-1.31409	2.46289e-16	-0.860209	3.61145e-08	-0.658015	2.25457e-05	-0.923917	2.4878e-09	2	Putative peroxiredoxin-like 2A/B/C, Thioredoxin-like superfamily
MtrunA17_Chr4g0021011	Medtr0004s0440	-0.571148	0.0366891	-1.38085	2.6121e-11	-1.14677	1.67935e-08	-1.7731	1.15761e-17	2	Putative peroxisomal biogenesis factor 11
MtrunA17_Chr1g0162471	Medtr1g034260	0	#N/A	-0.527695	0.00345103	-0.373414	0.0349398	-1.13512	6.05169e-12	2	Putative PetM of cytochrome b6/f complex subunit 7
MtrunA17_Chr8g0343361	Medtr8g019450	-2.16772	4.30602e-10	-0.981005	0.000681604	-0.737886	0.00841789	0	#N/A	2	Putative PGG domain-containing protein
MtrunA17_Chr8g0367931	Medtr8g069390	-0.774225	2.03798e-07	-0.686628	8.88288e-07	-0.846802	2.30627e-10	-1.09333	9.69246e-16	2	Putative phosphate transporter
MtrunA17_Chr3g0134981	Medtr3g103300	0	#N/A	-1.33528	5.51124e-12	-1.09674	1.00271e-08	-1.01009	2.80632e-07	2	Putative phosphatidylcholine--sterol O-acyltransferase
MtrunA17_Chr2g0325821	Medtr2g092930	-2.12614	3.43141e-27	-1.05468	7.61131e-08	-1.04644	4.42071e-08	-0.918448	3.39415e-06	2	Putative phosphoenolpyruvate carboxylase
MtrunA17_Chr2g0310601	Medtr2g066110	-0.667296	0.000366232	-0.520096	0.00451225	0	#N/A	-1.0735	1.36306e-10	2	Putative phosphoglycerate kinase
MtrunA17_Chr7g0249651	Medtr7g080530	-0.839001	3.72619e-05	-0.727993	0.000175283	0	#N/A	-1.21636	4.24331e-11	2	Putative phosphoglycolate phosphatase
MtrunA17_Chr5g0409821	Medtr5g027530	0	#N/A	-0.515525	0.0208599	0	#N/A	-1.35272	7.40757e-12	2	Putative phosphoribulokinase
MtrunA17_Chr3g0116461	Medtr3g075230	-0.693296	0.00431167	-0.841607	0.000116009	0	#N/A	-1.33168	1.78816e-10	2	Putative phosphoric monoester hydrolase
MtrunA17_Chr3g0092041	Medtr3g435320	0	#N/A	0	#N/A	0	#N/A	-1.17503	6.21358e-11	2	Putative photosynthetic NDH subunit of subcomplex B 4, chloroplastic protein
MtrunA17_Chr1g0157681	Medtr1g026820	0	#N/A	-0.457411	0.0261272	0	#N/A	-1.02476	1.62004e-08	2	Putative photosystem I
MtrunA17_Chr2g0291941	Medtr2g029370	0	#N/A	-0.436771	0.041211	0	#N/A	-1.01381	5.41817e-08	2	Putative photosystem I
MtrunA17_Chr7g0262621	Medtr7g099390	0	#N/A	0	#N/A	0	#N/A	-1.05822	2.59375e-06	2	Putative photosystem I PsaE, reaction centre subunit IV
MtrunA17_Chr3g0079941	Medtr3g010000	0	#N/A	-0.496361	0.021885	0	#N/A	-1.07536	2.25392e-08	2	Putative photosystem I PsaG/PsaK protein
MtrunA17_Chr1g0207001	Medtr1g106075	-1.43246	0.00103619	-1.06469	0.00735648	-1.08	0.0031554	-2.20354	1.16689e-09	2	Putative photosystem I reaction centre subunit N
MtrunA17_Chr3g0129661	Medtr3g095540	0	#N/A	0	#N/A	0	#N/A	-1.17277	1.12742e-08	2	Putative photosystem I reaction centre subunit N
MtrunA17_Chr3g0125881	Medtr3g089890	-0.910794	2.87898e-06	-0.988079	2.34745e-08	-0.623212	0.000502304	-1.02199	5.84891e-09	2	Putative photosystem II
MtrunA17_Chr4g0019291	Medtr4g037505	0	#N/A	0	#N/A	0	#N/A	-1.017	1.13923e-08	2	Putative photosystem II 5kDa protein
MtrunA17_Chr2g0324071	Medtr2g090200	-0.571817	0.00597226	-0.791074	1.39019e-05	-0.699291	8.45971e-05	-1.25809	9.95165e-13	2	Putative photosystem II Pbs27
MtrunA17_Chr1g0183221	Medtr1g069465	0	#N/A	-1.15642	1.26165e-10	-1.48017	3.21321e-17	-1.23056	9.56964e-12	2	Putative photosystem II Psb28, class 1
MtrunA17_Chr1g0150841	Medtr1g015290	0	#N/A	-1.39698	3.1108e-08	-1.55702	2.06525e-10	-2.26375	4.5852e-19	2	Putative photosystem II PsbX
MtrunA17_Chr2g0300351	Medtr2g041260	0	#N/A	-1.24813	0.00212839	0	#N/A	-2.03088	1.71279e-07	2	Putative photosystem II PsbX
MtrunA17_Chr4g0070691	Medtr4g125600	0	#N/A	-0.515631	0.018098	0	#N/A	-1.04147	9.00549e-08	2	Putative photosystem II PsbX
MtrunA17_Chr8g0381221	Medtr8g089610	0	#N/A	-0.442618	0.0178212	-0.429149	0.0138165	-1.03881	3.13587e-10	2	Putative photosystem II PsbY
MtrunA17_Chr3g0132411	Medtr3g099540	0	#N/A	-1.59298	8.67407e-08	-1.30549	8.41826e-06	-1.67551	2.15778e-08	2	Putative Phytocyanin domain, cupredoxin	MtENODL13;MtPCY5	ENOD-like 13;Plantacyanin/Chemocyanin
MtrunA17_Chr1g0185321	Medtr1g071730	-2.26532	8.13684e-13	-0.874442	0.0080633	0	#N/A	0	#N/A	2	Putative plant lipid transfer protein/Par allergen	MtnsLTP55	non-specific Lipid Transfer Protein
MtrunA17_Chr1g0205201	Medtr1g103490	-3.68441	3.15953e-22	-2.16086	1.34608e-09	0	#N/A	0	#N/A	2	Putative plant lipid transfer protein/Par allergen	MtnsLTP58	non-specific Lipid Transfer Protein
MtrunA17_Chr4g0003641	Medtr4g011070	-2.80246	1.62001e-20	-1.96272	1.19016e-11	0	#N/A	0	#N/A	2	Putative plant lipid transfer protein/Par allergen	MtnsLTP118	non-specific Lipid Transfer Protein
MtrunA17_Chr4g0012991	Medtr4g027800	0	#N/A	0	#N/A	-2.28434	0.00608168	-2.22711	0.0161112	2	Putative plant lipid transfer protein/Par allergen	MtnsLTP19	non-specific Lipid Transfer Protein
MtrunA17_Chr4g0012941	Medtr4g028360	0	#N/A	0	#N/A	0	#N/A	-3.30687	1.46225e-12	2	Putative plant lipid transfer protein/Par allergen	MtnsLTP24	non-specific Lipid Transfer Protein
MtrunA17_Chr4g0013261	Medtr4g029390	0	#N/A	0	#N/A	0	#N/A	-2.73836	7.6256e-06	2	Putative plant lipid transfer protein/Par allergen	MtnsLTP27	non-specific Lipid Transfer Protein
MtrunA17_Chr5g0394991	Medtr5g006940	-1.20584	5.52715e-13	-0.661043	0.000117636	0	#N/A	0	#N/A	2	Putative plant lipid transfer protein/Par allergen	MtnsLTP97	non-specific Lipid Transfer Protein
MtrunA17_Chr5g0395001	Medtr5g006950	-1.61204	9.78634e-29	-0.834923	8.48886e-09	-0.36353	0.0180438	0	#N/A	2	Putative plant lipid transfer protein/Par allergen	MtnsLTP59	non-specific Lipid Transfer Protein
MtrunA17_Chr1g0213401	Medtr1g116320	0	#N/A	-0.732725	0.00975692	0	#N/A	-1.27089	8.70871e-07	2	Putative plastid-lipid-associated protein
MtrunA17_Chr2g0278051	Medtr2g007300	-0.892746	1.2444e-06	-0.919198	5.5782e-08	-0.900059	4.73047e-08	-1.3557	6.59829e-16	2	Putative plastid-lipid-associated protein
MtrunA17_Chr7g0231891	Medtr7g444820	-1.61973	1.80898e-07	-0.787124	0.00451121	-0.812954	0.00147475	-1.28099	2.36774e-07	2	Putative plastid-lipid-associated protein
MtrunA17_Chr8g0383751	Medtr8g092680	0	#N/A	-0.880446	3.73367e-06	-0.557245	0.0037854	-1.06761	9.77521e-09	2	Putative plastid-lipid-associated protein
MtrunA17_Chr1g0198931	Medtr1g093990	0	#N/A	0	#N/A	-1.34167	2.8919e-08	0	#N/A	2	Putative pleiotropic drug resistance protein PDR/CDR
MtrunA17_Chr4g0046221	Medtr4g088055	0	#N/A	0	#N/A	-1.09813	2.90913e-06	0	#N/A	2	Putative P-loop containing nucleoside triphosphate hydrolase
MtrunA17_Chr7g0257431	#N/A	0	#N/A	-0.763723	0.000360212	-1.1869	1.27654e-09	-0.792564	0.000239759	2	Putative P-loop containing nucleoside triphosphate hydrolase
MtrunA17_Chr8g0374541	Medtr0391s0020	0	#N/A	0	#N/A	-1.25326	1.37291e-05	0	#N/A	2	Putative P-loop containing nucleoside triphosphate hydrolase, leucine-rich repeat domain superfamily
MtrunA17_Chr7g0226991	#N/A	0	#N/A	0	#N/A	0	#N/A	-2.61208	7.3529e-06	2	Putative PMR5 domain, PC-Esterase
MtrunA17_Chr6g0486721	Medtr6g088445	0	#N/A	0	#N/A	0	#N/A	-1.28718	8.18915e-05	2	Putative polyketide cyclase/dehydrase, START-like domain superfamily
MtrunA17_Chr6g0480741	Medtr6g075390	0	#N/A	0	#N/A	-1.397	3.18887e-07	-1.26614	9.98467e-06	2	Putative potassium channel, voltage-dependent, EAG/ELK/ERG, rmlC-like jelly roll	MtCNGCIVAd	cyclic nucleotide-gated channel
MtrunA17_Chr7g0218341	Medtr7g012260	0	#N/A	-0.956495	0.000389975	-1.15892	5.17981e-06	-2.2384	1.88429e-17	2	Putative potassium channel, voltage-dependent, ERG, rmlC-like jelly roll, cyclic nucleotide-binding	MtCNGC2	cyclic nucleotide-gated channel
MtrunA17_Chr5g0446161	Medtr5g095290	0	#N/A	-2.36177	1.45126e-06	-2.28598	1.63978e-06	-1.27923	0.0129855	2	Putative premnaspirodiene oxygenase
MtrunA17_Chr0c12g0493641	Medtr4g134780	-1.01042	5.99575e-10	-0.690377	1.81708e-05	-0.399382	0.0153412	-0.83671	9.56343e-08	2	Putative prolycopene isomerase
MtrunA17_Chr1g0162701	Medtr1g034480	0	#N/A	0	#N/A	-1.02622	0.000122387	0	#N/A	2	putative protein
MtrunA17_Chr1g0177871	Medtr1g057940	0	#N/A	0	#N/A	-1.02325	0.000380235	0	#N/A	2	putative protein
MtrunA17_Chr1g0180501	Medtr1g063070	-0.983024	2.48778e-06	-0.613693	0.00271023	-0.983422	1.21516e-07	-1.23338	7.51257e-11	2	putative protein
MtrunA17_Chr1g0184881	Medtr1g070970	0	#N/A	-0.883295	8.24482e-09	-0.856904	1.06822e-08	-1.00029	7.36626e-11	2	putative protein
MtrunA17_Chr1g0200991	Medtr1g097270	-0.541728	0.025371	-0.552731	0.0123177	-0.550904	0.00759048	-1.06265	9.55688e-08	2	putative protein
MtrunA17_Chr1g0202401	Medtr1g099500	0	#N/A	0	#N/A	-1.18352	0.00183371	0	#N/A	2	putative protein
MtrunA17_Chr1g0203351	Medtr1g100627	0	#N/A	0	#N/A	-2.11446	0.00125556	0	#N/A	2	putative protein
MtrunA17_Chr1g0206971	Medtr1g106060	0	#N/A	0	#N/A	-1.18984	0.000248757	0	#N/A	2	putative protein
MtrunA17_Chr1g0212681	Medtr1g115410	-1.4013	3.77744e-05	-1.4015	8.18093e-06	-1.03509	0.00085201	-1.97528	1.3485e-10	2	putative protein
MtrunA17_Chr2g0316751	Medtr2g078540	-0.642934	0.0314736	0	#N/A	0	#N/A	-1.01106	5.73757e-05	2	putative protein
MtrunA17_Chr2g0319661	Medtr2g083300	-0.674663	0.0317813	-0.563717	0.0494205	-1.475	1.39173e-09	0	#N/A	2	putative protein
MtrunA17_Chr3g0086951	Medtr3g026020	0	#N/A	-0.710586	1.33031e-08	-0.569233	4.55292e-06	-1.01147	4.0143e-16	2	putative protein
MtrunA17_Chr3g0089201	Medtr3g030950	-0.580165	0.000700953	-0.753256	5.85972e-07	-0.902448	4.16754e-10	-1.00783	7.67782e-12	2	putative protein
MtrunA17_Chr3g0122331	Medtr3g085020	0	#N/A	-0.851484	0.0357589	-1.11802	0.002406	-1.48034	6.86442e-05	2	putative protein
MtrunA17_Chr3g0131551	Medtr3g098500	-1.56554	0.000235678	-1.64831	2.18338e-05	-1.56862	2.90141e-05	-2.30952	1.47345e-09	2	putative protein
MtrunA17_Chr3g0135091	Medtr3g103400	-0.985113	1.26545e-05	-0.790327	0.00020229	-1.03321	2.85883e-07	0	#N/A	2	putative protein
MtrunA17_Chr3g0136321	Medtr3g105100	-0.53691	0.00713604	-0.956974	9.94226e-09	-1.02466	2.77714e-10	-1.13913	6.44142e-12	2	putative protein
MtrunA17_Chr3g0139261	Medtr3g109280	0	#N/A	0	#N/A	-1.45388	0.000356591	-1.43236	0.000573478	2	putative protein
MtrunA17_Chr3g0144291	Medtr3g116110	-0.476874	0.0438318	-0.549239	0.00863434	0	#N/A	-1.33803	1.37953e-12	2	putative protein
MtrunA17_Chr4g0054221	Medtr4g097260	0	#N/A	-0.612969	0.00235075	0	#N/A	-1.0334	1.49561e-08	2	putative protein
MtrunA17_Chr5g0409601	Medtr5g027220	-0.554637	0.049964	-0.890047	0.000152118	-0.572346	0.0146657	-1.11968	6.01648e-07	2	putative protein
MtrunA17_Chr5g0410131	Medtr5g028020	-1.01748	1.11774e-05	0	#N/A	0	#N/A	-0.793243	0.000325468	2	putative protein
MtrunA17_Chr6g0452611	Medtr6g011050	-0.671354	0.00126731	0	#N/A	-1.04557	3.3921e-09	-0.518562	0.00754272	2	putative protein
MtrunA17_Chr7g0222751	Medtr7g023290	-0.886982	1.77484e-06	-0.510735	0.00713644	-0.454279	0.0119267	-1.35287	2.82539e-15	2	putative protein
MtrunA17_Chr8g0347631	Medtr8g028100	-1.21653	1.06669e-08	-0.982666	1.07994e-06	-0.661479	0.00107611	-1.51006	2.00636e-14	2	putative protein
MtrunA17_Chr8g0385601	Medtr8g096080	-0.651328	0.000616762	-0.671427	0.000112823	-0.426358	0.0139578	-1.14335	2.93941e-12	2	putative protein
MtrunA17_Chr5g0406451	#N/A	0	#N/A	0	#N/A	0	#N/A	-1.10903	0.00390372	2	putative protein
MtrunA17_Chr1g0178641	Medtr1g059990	1.12322	4.56748e-05	-1.4289	1.54275e-08	-1.47643	2.03086e-09	0	#N/A	2	Putative protein BIC
MtrunA17_Chr2g0321471	Medtr2g086480	0	#N/A	-1.66682	0.00033785	-2.00639	5.9329e-06	-1.1138	0.0204507	2	Putative protein BIC
MtrunA17_Chr7g0266241	Medtr7g104540	0	#N/A	-2.02561	1.25151e-14	-2.243	4.51165e-18	-1.28383	1.1899e-06	2	Putative protein BIC
MtrunA17_Chr4g0065081	Medtr4g116350	-1.11993	0.00038755	-1.02742	0.000310037	-0.899785	0.00103407	-1.88718	2.83447e-12	2	Putative protein chlororespiratory reduction 6
MtrunA17_Chr8g0340991	Medtr8g014900	0	#N/A	0	#N/A	0	#N/A	-1.82366	1.66631e-10	2	Putative protein CHUP1
MtrunA17_Chr1g0156491	Medtr1g024840	-1.16855	1.20028e-13	-0.789958	3.21909e-07	-0.590337	0.000129557	-1.08098	1.32853e-12	2	Putative protein disulfide-isomerase
MtrunA17_Chr3g0138861	Medtr3g108730	0	#N/A	-0.773165	0.000303499	-1.24141	1.65146e-10	-0.543885	0.0115493	2	Putative protein FAM32A
MtrunA17_Chr2g0309421	Medtr2g062850	0	#N/A	0	#N/A	-1.14495	0.000419867	0	#N/A	2	Putative protein kinase AGC-RSK-2 family
MtrunA17_Chr8g0346071	Medtr8g024590	0	#N/A	-0.74397	7.86464e-06	-0.525229	0.00151708	-1.01436	2.4652e-10	2	Putative protein kinase CAMK-CAMKL-CHK1 family
MtrunA17_Chr8g0334531	Medtr8g005720	0	#N/A	-1.44399	1.605e-14	-1.30679	1.67546e-12	-1.28813	1.1133e-11	2	Putative protein kinase Group-Pl-4 family
MtrunA17_Chr8g0347471	Medtr8g027985	0.875523	0.000118968	-1.64278	6.04125e-16	-1.62	5.96149e-16	-0.464676	0.0424638	2	Putative protein kinase PEK-PEK family transcription factor WD40-like family
MtrunA17_Chr3g0104881	Medtr3g464080	0	#N/A	0	#N/A	-1.17546	7.10401e-06	0	#N/A	2	Putative protein kinase RLK-Pelle-CR4L family
MtrunA17_Chr4g0048801	Medtr4g091860	0	#N/A	0	#N/A	0	#N/A	-2.87317	4.20045e-08	2	Putative protein kinase RLK-Pelle-DLSV family
MtrunA17_Chr8g0340071	Medtr8g013580	0	#N/A	0	#N/A	-1.01918	0.000178403	0	#N/A	2	Putative protein kinase RLK-Pelle-DLSV family
MtrunA17_Chr5g0428851	Medtr5g068770	-0.476114	0.00581527	-0.653372	1.39019e-05	-0.835365	4.91697e-09	-1.07013	1.90552e-13	2	Putative protein kinase RLK-Pelle-L-LEC family
MtrunA17_Chr2g0288391	Medtr2g023150	0	#N/A	0	#N/A	-1.22547	2.5348e-05	-1.29688	3.60493e-05	2	Putative protein kinase RLK-Pelle-LRR-III family
MtrunA17_Chr8g0379571	Medtr8g087420	-0.753036	0.0218468	0	#N/A	-1.07169	0.000124087	-0.85764	0.00662256	2	Putative protein kinase RLK-Pelle-LRR-III family
MtrunA17_Chr1g0193121	Medtr1g084790	0	#N/A	-0.566852	0.0147852	-0.465377	0.0326716	-1.05418	1.51773e-07	2	Putative protein kinase RLK-Pelle-LRR-VI-2 family
MtrunA17_Chr1g0165901	Medtr1g040615	0	#N/A	-0.882532	0.00355534	0	#N/A	-1.62171	1.94639e-09	2	Putative protein kinase RLK-Pelle-LRR-XI-1 family
MtrunA17_Chr5g0447001	Medtr5g096530	0	#N/A	-0.901814	0.0029713	-1.28097	4.48427e-06	-1.96186	4.86343e-12	2	Putative protein kinase RLK-Pelle-LRR-XI-1 family
MtrunA17_Chr5g0408581	Medtr5g025950	0	#N/A	0	#N/A	0	#N/A	-1.56924	0.000196425	2	Putative protein kinase RLK-Pelle-LRR-XII-1 family
MtrunA17_Chr1g0149381	Medtr1g012550	0	#N/A	-0.46371	0.033717	0	#N/A	-1.20963	2.25633e-10	2	Putative protein kinase RLK-Pelle-SD-2b family
MtrunA17_Chr1g0202331	Medtr1g099400	-1.5637	1.18471e-05	-1.50699	6.93751e-06	0	#N/A	0	#N/A	2	Putative protein kinase RLK-Pelle-SD-2b family
MtrunA17_Chr3g0125441	Medtr3g088755	0	#N/A	0	#N/A	0	#N/A	-1.03472	0.00422154	2	Putative protein kinase RLK-Pelle-WAK family
MtrunA17_Chr7g0222391	Medtr7g022360	0	#N/A	0	#N/A	0	#N/A	-1.59464	1.38077e-08	2	Putative protein LAZY1
MtrunA17_Chr7g0224731	Medtr7g028590	0	#N/A	-0.892184	0.0166728	-1.13346	0.000873706	-1.90795	2.38847e-08	2	Putative protein LAZY1
MtrunA17_Chr7g0266161	Medtr7g104410	0	#N/A	-1.1177	1.05507e-05	-1.04158	8.99915e-06	-0.708254	0.00453906	2	Putative protein LITTLE ZIPPER
MtrunA17_Chr1g0182941	Medtr1g069240	-1.20836	4.00905e-07	-0.842251	0.000227799	-0.805663	0.000250069	-1.6111	1.7558e-13	2	Putative protein LOW PSII ACCUMULATION 1
MtrunA17_Chr3g0081651	Medtr3g013460	0	#N/A	-1.15137	7.20453e-15	-1.24294	1.30463e-17	-1.19231	1.90813e-15	2	Putative protein maintenance of PSII under high light 1
MtrunA17_Chr5g0412211	Medtr5g032060	0	#N/A	0	#N/A	-1.10015	2.05151e-05	-0.859859	0.0017846	2	Putative protein Networked (NET), actin-binding (NAB)
MtrunA17_Chr8g0392591	Medtr8g106640	0	#N/A	0	#N/A	-1.04212	1.35244e-05	0	#N/A	2	Putative protein O-GlcNAc transferase
MtrunA17_Chr5g0416971	Medtr5g040340	0	#N/A	0	#N/A	0	#N/A	-1.71565	2.80031e-06	2	Putative protein PHYTOCHROME KINASE SUBSTRATE
MtrunA17_Chr3g0128351	Medtr3g093400	0	#N/A	-1.23396	2.12731e-12	-1.83037	2.76351e-26	-1.49745	2.90573e-17	2	Putative protein response to low sulfur
MtrunA17_Chr2g0314441	Medtr2g073010	0	#N/A	0	#N/A	0	#N/A	-1.00056	1.52137e-05	2	Putative proteinase inhibitor I3, Kunitz legume, kunitz inhibitor STI-like superfamily	MtKunitz6	Kunitz-P Trypsin Inhibitor
MtrunA17_Chr3g0137441	Medtr3g106620	-0.864507	0.0203349	0	#N/A	0	#N/A	-1.21311	0.000104012	2	Putative proteinase inhibitor I3, Kunitz legume, kunitz inhibitor STI-like superfamily	MtKunitz10	Kunitz-P Trypsin Inhibitor
MtrunA17_Chr6g0476821	#N/A	0	#N/A	-1.29137	3.92098e-07	0	#N/A	0	#N/A	2	Putative proteinase inhibitor I3, Kunitz legume, kunitz inhibitor STI-like superfamily
MtrunA17_Chr3g0143311	Medtr3g114530	0	#N/A	0	#N/A	-1.22447	0.00225104	0	#N/A	2	Putative protein-disulfide reductase
MtrunA17_Chr8g0389921	Medtr8g102550	0	#N/A	-0.756072	0.0108436	-1.00181	0.000200489	0	#N/A	2	Putative protein-serine/threonine phosphatase
MtrunA17_Chr4g0049871	Medtr4g093560	0	#N/A	-0.551223	0.0037046	0	#N/A	-1.0186	4.25664e-09	2	Putative protein-tyrosine-phosphatase
MtrunA17_Chr5g0438971	Medtr5g085300	0	#N/A	-0.745489	1.83647e-08	-1.01494	1.5902e-15	0	#N/A	2	Putative protein-tyrosine-phosphatase
MtrunA17_Chr3g0114501	Medtr3g072300	0	#N/A	-1.05013	1.43612e-07	0	#N/A	-1.17273	3.78388e-09	2	Putative proton-dependent oligopeptide transporter family, MFS transporter superfamily	MtNPF5.1	NRT1/ PTR FAMILY;nitrate transporter / peptide transporter
MtrunA17_Chr4g0014871	Medtr4g033395	0	#N/A	-1.15917	4.31626e-05	-0.989646	0.000399316	0	#N/A	2	Putative proton-dependent oligopeptide transporter family, MFS transporter superfamily
MtrunA17_Chr4g0063591	Medtr4g114340	0	#N/A	0	#N/A	0	#N/A	-1.074	0.00123686	2	Putative proton-dependent oligopeptide transporter family, MFS transporter superfamily	MtNPF6.4	NRT1/ PTR FAMILY;nitrate transporter / peptide transporter
MtrunA17_Chr5g0422881	Medtr5g055000	0	#N/A	0	#N/A	0	#N/A	-1.11973	1.19237e-11	2	Putative proton-dependent oligopeptide transporter family, MFS transporter superfamily	MtNPF3.1	NRT1/ PTR FAMILY;nitrate transporter / peptide transporter
MtrunA17_Chr5g0397621	#N/A	0	#N/A	-0.619485	0.0404057	-1.28484	8.04039e-07	-1.97564	1.05906e-13	2	Putative P-type Cu(2+) transporter
MtrunA17_Chr1g0179791	Medtr1g062130	0	#N/A	-0.749761	4.02135e-05	-0.774676	9.21362e-06	-1.18504	1.20905e-11	2	Putative purine-cytosine permease
MtrunA17_Chr3g0127491	Medtr3g092140	-0.58306	0.0447337	-0.60713	0.0118565	-0.64231	0.00345187	-1.06425	4.27755e-07	2	Putative pyridoxine 4-dehydrogenase
MtrunA17_Chr3g0095421	Medtr3g449790	-0.938802	2.03798e-07	-0.833917	1.01266e-06	-0.645722	0.000135979	-1.15468	4.77006e-12	2	Putative pyridoxine 4-dehydrogenase
MtrunA17_Chr7g0242981	Medtr7g069540	-1.00385	0.021126	-1.67668	7.31781e-06	-1.38573	0.000172499	0	#N/A	2	Putative pyruvate decarboxylase
MtrunA17_Chr3g0112371	Medtr3g069030	-0.942084	5.37493e-09	-1.19699	2.68151e-16	-0.994896	6.23001e-12	-0.78357	1.87131e-07	2	Putative regulator of chromosome condensation 1/beta-lactamase-inhibitor protein II
MtrunA17_Chr3g0112381	Medtr3g069030	-0.565601	0.000629264	-1.10088	7.3251e-16	-1.08739	5.00899e-16	-0.846129	1.23313e-09	2	Putative regulator of chromosome condensation 1/beta-lactamase-inhibitor protein II
MtrunA17_Chr8g0376881	Medtr8g079940	-1.05663	1.49348e-05	-0.669472	0.011066	-0.88802	0.000273112	0	#N/A	2	Putative response regulator and transcription factor RR-B-type family	MtRRB20	type-B response regulator
MtrunA17_Chr4g0006411	Medtr4g015860	-0.618191	0.00992856	0	#N/A	0	#N/A	-1.03424	4.01766e-07	2	Putative Rhodanese-like domain-containing protein
MtrunA17_Chr4g0062121	Medtr4g112530	-0.887291	9.86266e-08	-0.690998	1.68727e-05	-0.480616	0.00281349	-1.0715	4.79727e-12	2	Putative Rhodanese-like domain-containing protein
MtrunA17_Chr6g0457251	Medtr0024s0260	0	#N/A	-0.660579	0.000758091	-0.613327	0.00114896	-1.05355	1.08467e-08	2	Putative rhomboid protease
MtrunA17_Chr1g0180641	#N/A	0	#N/A	0	#N/A	-1.02241	0.000432291	0	#N/A	2	Putative ribonuclease H domain-containing protein
MtrunA17_Chr1g0155311	Medtr1g022375	0	#N/A	-0.585396	0.00859696	-0.608143	0.00352158	-1.12534	7.16194e-08	2	Putative ribosomal protein L7/L30
MtrunA17_Chr4g0056571	Medtr4g101740	-1.45645	4.83165e-06	-1.22732	3.34728e-05	-0.936527	0.00130015	-1.70814	2.06548e-09	2	Putative ribosomal protein S5 domain 2-type
MtrunA17_Chr6g0457461	Medtr6g018300	0	#N/A	-0.765108	0.00809721	0	#N/A	-1.74019	4.49347e-11	2	Putative ribulose-bisphosphate carboxylase
MtrunA17_Chr6g0457471	Medtr6g018310	0	#N/A	-0.76094	0.000688148	0	#N/A	-1.39978	3.34748e-11	2	Putative ribulose-bisphosphate carboxylase
MtrunA17_Chr7g0215381	Medtr7g007200	0	#N/A	-0.894445	0.00141149	-0.962482	0.000270516	-2.35501	7.92342e-19	2	Putative ribulose-bisphosphate carboxylase
MtrunA17_Chr7g0215421	Medtr7g007220	0	#N/A	-1.10658	0.00365151	-1.20297	0.000726742	-3.07558	3.08621e-17	2	Putative ribulose-bisphosphate carboxylase
MtrunA17_Chr7g0215431	Medtr7g007230	0	#N/A	-0.596427	0.0420921	0	#N/A	-1.57661	8.57621e-10	2	Putative ribulose-bisphosphate carboxylase
MtrunA17_Chr7g0215351	#N/A	0	#N/A	-0.67482	0.0100194	0	#N/A	-1.81457	2.70481e-14	2	Putative ribulose-bisphosphate carboxylase
MtrunA17_Chr7g0215361	#N/A	0	#N/A	-1.33641	0.00072385	-1.02638	0.00772953	-3.14262	6.58606e-16	2	Putative ribulose-bisphosphate carboxylase
MtrunA17_Chr5g0396291	Medtr5g008750	-0.539283	0.00162333	-0.764547	3.36697e-07	-0.705486	1.45502e-06	-1.14831	5.51463e-15	2	Putative rieske-like [2Fe-2S] domain, NirD-type, rieske [2Fe-2S] iron-sulphur protein
MtrunA17_Chr1g0188281	Medtr1g076840	-0.822152	0.00070496	-0.724007	0.00149412	-0.582765	0.00830482	-1.46067	5.49865e-12	2	Putative rmlC-like cupin domain superfamily, rmlC-like jelly roll protein
MtrunA17_Chr2g0309551	Medtr2g063080	-0.61424	0.00140356	-0.742152	1.6732e-05	-0.98724	1.42392e-09	-1.13613	9.89178e-12	2	Putative RNA helicase
MtrunA17_Chr1g0180881	Medtr1g063850	-0.797076	0.000131171	-0.758784	0.000111427	-0.669973	0.000455376	-1.23622	4.87675e-11	2	Putative RNA polymerase sigma factor, region 3/4, RNA polymerase sigma factor, region 2
MtrunA17_Chr3g0090001	Medtr3g033420	0	#N/A	-0.797921	0.00972949	-0.769285	0.00809644	-1.53797	2.47355e-08	2	Putative RNA polymerase sigma factor, region 3/4, RNA polymerase sigma factor, region 2
MtrunA17_Chr3g0126401	Medtr3g090900	0.536175	0.00241212	-1.43071	8.09068e-22	-1.24383	2.68302e-17	-0.64554	3.45605e-05	2	Putative RNA polymerase sigma factor, region 3/4, RNA polymerase sigma factor, region 2
MtrunA17_Chr3g0103761	Medtr3g462330	0	#N/A	-1.06912	5.81866e-18	-0.962926	3.4862e-15	-0.438653	0.000986034	2	Putative RNA recognition motif domain, nucleotide-binding alpha-beta plait domain superfamily
MtrunA17_Chr5g0414251	Medtr5g035330	-0.788346	2.19833e-05	-0.60841	0.000527293	-0.696773	2.36891e-05	-1.05099	1.36351e-10	2	Putative RNA recognition motif domain, nucleotide-binding alpha-beta plait domain superfamily
MtrunA17_Chr7g0267571	Medtr7g106440	-1.05301	3.14425e-10	-0.622722	0.000161936	-0.627376	7.12402e-05	-1.00721	1.26733e-10	2	Putative RNA recognition motif domain, nucleotide-binding alpha-beta plait domain superfamily
MtrunA17_Chr1g0161511	Medtr1g032720	0	#N/A	0	#N/A	-1.38768	7.28747e-05	-1.90846	5.23684e-07	2	Putative RNA-directed RNA polymerase
MtrunA17_Chr6g0486821	Medtr6g088660	0	#N/A	-0.839962	0.00389045	0	#N/A	-1.59565	3.20432e-09	2	Putative RNA-directed RNA polymerase
MtrunA17_Chr8g0383471	Medtr8g092320	0	#N/A	-1.29022	0.00237373	0	#N/A	-1.61459	7.41574e-05	2	Putative Root meristem growth factor 9	MtGLV3; MtRGF9	Golven/ Root Growth Factor; Root Meristem Growth Factor (peptide)
MtrunA17_Chr8g0383481	Medtr8g092340	0	#N/A	-1.31647	0.0435284	0	#N/A	-1.7112	0.00512224	2	Putative Root meristem growth factor 9	MtGLV7; MtRGF10	Golven/ Root Growth Factor; Root Meristem Growth Factor (peptide)
MtrunA17_Chr8g0370491	Medtr8g073540	0.516425	0.00472773	-0.742137	1.77107e-06	-1.09547	8.36782e-14	-0.443544	0.00633716	2	Putative rubber cis-polyprenylcistransferase
MtrunA17_Chr1g0190081	Medtr1g079870	0	#N/A	-0.897548	6.58101e-07	-0.982411	1.77744e-08	-1.17695	2.90346e-11	2	Putative rubisco accumulation factor 1
MtrunA17_Chr7g0273811	Medtr7g114590	-0.720565	1.27286e-05	-0.750682	7.06918e-07	-0.663373	7.58794e-06	-1.05748	9.50923e-13	2	Putative rubredoxin, iron-binding protein
MtrunA17_Chr3g0131571	Medtr3g098520	-0.84445	2.25055e-07	-0.812715	1.15381e-07	-0.650069	1.88793e-05	-1.08196	9.50923e-13	2	Putative Rubredoxin-like domain-containing protein
MtrunA17_Chr8g0350391	Medtr8g432680	0	#N/A	0	#N/A	-1.05138	2.18887e-08	-1.14132	2.20132e-09	2	Putative S-adenosyl-L-methionine-dependent methyltransferase
MtrunA17_Chr1g0213361	Medtr1g116270	-0.73551	0.00137425	-0.874793	2.38708e-05	-0.699272	0.000614945	-1.29941	8.89336e-11	2	Putative S-crystallin, Thioredoxin-like superfamily, glutathione S-transferase domain superfamily
MtrunA17_Chr3g0113101	Medtr3g070100	-1.23874	3.34818e-10	-0.862062	9.11993e-06	-0.618441	0.00144876	-1.51792	9.69246e-16	2	Putative sedoheptulose-bisphosphatase
MtrunA17_Chr2g0291031	Medtr2g027870	0	#N/A	0	#N/A	-1.07908	0.0015493	0	#N/A	2	Putative serine aminopeptidase, S33, alpha/Beta hydrolase
MtrunA17_Chr7g0242411	Medtr7g068470	0	#N/A	0	#N/A	0	#N/A	-2.22822	7.18425e-08	2	Putative SGNH hydrolase-type esterase domain, SGNH hydrolase superfamily
MtrunA17_Chr8g0359251	Medtr0190s0020	0	#N/A	0	#N/A	-1.51464	4.48349e-09	0	#N/A	2	Putative shikimate O-hydroxycinnamoyltransferase
MtrunA17_Chr3g0132831	Medtr3g100150	-1.57079	0.0498283	0	#N/A	-2.33988	0.000420147	0	#N/A	2	Putative shikimate O-hydroxycinnamoyltransferase
MtrunA17_Chr4g0010351	Medtr4g022760	0	#N/A	0	#N/A	0	#N/A	-1.1406	9.17966e-08	2	Putative shikimate O-hydroxycinnamoyltransferase
MtrunA17_Chr7g0247031	Medtr7g076660	-0.552021	0.000352256	-1.20378	6.91075e-20	-1.39681	6.95764e-27	-0.314184	0.0369658	2	Putative short-chain dehydrogenase/reductase SDR, NAD(P)-binding domain superfamily
MtrunA17_Chr8g0349781	Medtr8g031990	0	#N/A	0	#N/A	-0.408644	0.0362517	-1.20257	4.73911e-11	2	Putative short-chain dehydrogenase/reductase SDR, NAD(P)-binding domain superfamily
MtrunA17_Chr2g0331011	Medtr2g100880	-1.78974	0.000215835	0	#N/A	0	#N/A	0	#N/A	2	Putative signal transduction histidine kinase, phosphotransfer (Hpt) domain, HPT domain superfamily	MtHPT4	Histidine PhosphoTransfer protein 4
MtrunA17_Chr2g0278931	Medtr2g008470	-0.574511	0.0284447	0	#N/A	-1.24015	3.05243e-09	-1.28056	2.349e-09	2	Putative SLC26A/SulP transporter, STAS domain superfamily	MtSULTR1.1	sulfate transporter
MtrunA17_Chr3g0115461	Medtr3g073730	-1.01765	8.66752e-09	-1.12997	9.76546e-12	-1.58881	2.04792e-22	-0.939796	4.64821e-08	2	Putative SLC26A/SulP transporter, STAS domain superfamily	MtSULTR2.2b	sulfate transporter
MtrunA17_Chr3g0124381	Medtr3g087740	0	#N/A	0	#N/A	-1.61775	3.45673e-21	-0.682077	0.000186951	2	Putative SLC26A/SulP transporter, STAS domain superfamily	MtSULTR2.1	sulfate transporter
MtrunA17_Chr4g0004261	Medtr4g011970	-0.942406	0.00129664	-0.959907	0.000410531	-1.23867	1.17965e-06	-1.28994	7.28897e-07	2	Putative SLC26A/SulP transporter, STAS domain superfamily	MtSULTR3.4b	sulfate transporter
MtrunA17_Chr5g0425251	Medtr5g061880	0	#N/A	0	#N/A	-1.41401	1.68589e-08	-0.602812	0.0328578	2	Putative SLC26A/SulP transporter, STAS domain superfamily	MtSULTR1.3	sulfate transporter
MtrunA17_Chr7g0230411	Medtr0388s0020	0	#N/A	0	#N/A	0	#N/A	-1.64369	4.05237e-11	2	Putative small auxin-up RNA
MtrunA17_Chr4g0036191	Medtr4g072230	0	#N/A	-1.83155	3.18335e-08	-1.27456	7.60464e-05	-2.26947	4.95347e-13	2	Putative small auxin-up RNA
MtrunA17_Chr4g0036521	Medtr4g072560	0	#N/A	0	#N/A	-1.33844	0.00258545	0	#N/A	2	Putative small auxin-up RNA
MtrunA17_Chr4g0036711	Medtr4g072770	0	#N/A	-2.1934	1.07662e-09	-2.38166	1.2008e-11	-2.50673	2.63558e-12	2	Putative small auxin-up RNA
MtrunA17_Chr4g0036771	Medtr4g072840	0	#N/A	0	#N/A	0	#N/A	-1.3577	4.16952e-05	2	Putative small auxin-up RNA
MtrunA17_Chr4g0046751	Medtr4g088450	0	#N/A	-0.663483	0.0363817	-1.23482	7.48936e-06	0	#N/A	2	Putative small heat shock protein HSP20
MtrunA17_Chr5g0447361	Medtr5g097030	0	#N/A	0	#N/A	-1.28986	0.000142466	0	#N/A	2	Putative small nuclear ribonucleoprotein Sm D2
MtrunA17_Chr4g0032371	Medtr4g065007	-0.566704	0.00133226	-0.652924	4.4531e-05	-0.805826	9.86936e-08	-1.20017	4.70793e-15	2	Putative solute carrier family 13
MtrunA17_Chr6g0466831	Medtr6g042310	0	#N/A	0	#N/A	-1.03994	0.00465029	0	#N/A	2	Putative soyasaponin III rhamnosyltransferase
MtrunA17_Chr6g0477011	#N/A	0	#N/A	0	#N/A	-1.09962	0.00109024	0	#N/A	2	Putative soyasaponin III rhamnosyltransferase
MtrunA17_Chr8g0366191	Medtr8g066220	0	#N/A	0	#N/A	-1.26029	2.19129e-05	0	#N/A	2	Putative steroid sulfotransferase
MtrunA17_Chr2g0288941	Medtr2g024030	0	#N/A	0	#N/A	-1.10846	0.00353382	0	#N/A	2	Putative stigma-specific protein Stig1	MtSTIG/GRI_6	Stigma1 / GRI
MtrunA17_Chr8g0353591	Medtr8g040250	-1.83008	3.22992e-05	-1.68308	4.96538e-05	-1.01473	0.0147903	0	#N/A	2	Putative Sulfotransferase domain, P-loop containing nucleoside triphosphate hydrolase
MtrunA17_Chr8g0353731	Medtr8g040520	0	#N/A	-1.07092	0.00643637	-1.3779	0.000149669	0	#N/A	2	Putative Sulfotransferase domain, P-loop containing nucleoside triphosphate hydrolase
MtrunA17_Chr2g0295681	Medtr2g436310	-1.31115	1.4435e-10	-0.763642	0.000191963	-1.01019	1.22355e-07	-1.06644	5.25654e-08	2	Putative SWEET sugar transporter	MtSWEET16	probable Sucrose transporter
MtrunA17_Chr3g0126411	Medtr3g090940	0	#N/A	-1.34758	0.000442921	0	#N/A	0	#N/A	2	Putative SWEET sugar transporter	MtSWEET3a	(probable Sucrose transporter)
MtrunA17_Chr3g0131951	Medtr3g098910	0	#N/A	0	#N/A	0	#N/A	-2.58415	0.00470925	2	Putative SWEET sugar transporter	MtSWEET13	probable Sucrose transporter
MtrunA17_Chr3g0101611	Medtr3g057910	-0.848066	0.0092095	-0.932148	0.000323155	-1.27833	1.02895e-07	-1.84743	2.82615e-14	2	Putative tabersonine 16-hydroxylase
MtrunA17_Chr4g0040501	Medtr4g078850	0	#N/A	-0.735905	1.53534e-07	-1.06243	1.50211e-15	-0.590222	2.91086e-05	2	Putative terminal organelle assembly protein TopJ
MtrunA17_Chr1g0181661	Medtr1g066900	-0.374308	0.0468231	-0.927592	3.22206e-10	-1.09577	2.39238e-14	-0.864273	6.15915e-09	2	Putative tetratricopeptide-like helical domain superfamily
MtrunA17_Chr7g0237581	Medtr7g058930	0	#N/A	-0.780089	4.99777e-06	-1.38556	3.26437e-18	-1.12313	7.66959e-12	2	Putative tetratricopeptide-like helical domain superfamily
MtrunA17_Chr7g0237621	Medtr7g059010	0	#N/A	-0.879575	0.00130662	-2.12098	1.27582e-18	-1.37557	1.92091e-08	2	Putative tetratricopeptide-like helical domain superfamily
MtrunA17_Chr1g0210801	Medtr1g112240	0	#N/A	0	#N/A	0	#N/A	-1.01355	5.43417e-05	2	Putative tetratricopeptide-like helical domain superfamily, pentacotripeptide-repeat region of PRORP
MtrunA17_Chr1g0180221	Medtr1g062660	1.64645	0.00506402	4.74848	1.03711e-18	4.50071	1.06123e-17	2.13405	2.71438e-05	2	Putative Thaumatin family
MtrunA17_Chr2g0322071	Medtr2g087430	0.858635	0.000970434	-0.777195	0.00114851	-1.00652	5.47974e-06	-0.72684	0.00209732	2	Putative The fantastic four family protein
MtrunA17_Chr5g0394171	Medtr5g005770	0	#N/A	0	#N/A	-1.52168	0.000604966	0	#N/A	2	Putative The fantastic four family protein
MtrunA17_Chr2g0286271	Medtr2g019950	-2.03022	4.06086e-08	0	#N/A	0	#N/A	0	#N/A	2	Putative thioredoxin-disulfide reductase
MtrunA17_Chr3g0117991	Medtr3g078320	0	#N/A	-1.15439	6.18742e-12	-1.05513	1.69806e-10	-0.946212	2.5827e-08	2	Putative Thioredoxin-like superfamily
MtrunA17_Chr8g0371681	Medtr8g075420	0	#N/A	0	#N/A	-1.03981	2.9797e-08	-0.626433	0.00192585	2	Putative thiosulfate sulfurtransferase
MtrunA17_Chr3g0132151	Medtr3g099140	-0.646402	0.000234682	-0.774835	3.60623e-07	-0.59955	5.81694e-05	-1.04646	9.86512e-13	2	Putative thylakoid lumenal 17.9kDa protein
MtrunA17_Chr3g0104281	Medtr3g462990	0	#N/A	-0.651021	2.98898e-05	-0.429568	0.00612642	-1.15339	1.32705e-14	2	Putative thylakoid soluble phosphoprotein TSP9
MtrunA17_Chr5g0429641	Medtr5g069990	-0.964152	1.14826e-05	-1.26768	4.85684e-11	-1.07169	1.68589e-08	-1.43772	1.144e-13	2	Putative thylakoid soluble phosphoprotein TSP9
MtrunA17_Chr3g0084731	Medtr3g020490	0	#N/A	-1.36558	1.13106e-07	-0.803238	0.00199754	0	#N/A	2	Putative TIR domain, AAA+ ATPase domain, P-loop containing nucleoside triphosphate hydrolase
MtrunA17_Chr8g0338981	Medtr8g012080	-0.733845	0.000753319	-0.730721	0.00024373	-0.603071	0.00189433	-1.16152	7.09443e-10	2	Putative TIR domain, P-loop containing nucleoside triphosphate hydrolase
MtrunA17_Chr6g0480951	Medtr6g075870	0	#N/A	0	#N/A	0.954709	0.0132702	-1.5031	5.84626e-05	2	Putative TIR domain-containing protein
MtrunA17_Chr6g0478991	Medtr6g472220	0	#N/A	0	#N/A	0	#N/A	-1.00101	0.000366947	2	Putative TIR domain-containing protein
MtrunA17_Chr4g0054781	Medtr4g098620	-1.91204	4.99561e-06	-1.68117	4.63035e-06	0	#N/A	-2.36329	2.08383e-11	2	Putative TLDc domain-containing protein
MtrunA17_Chr1g0203821	Medtr1g101540	0	#N/A	-1.41113	9.76354e-14	-1.3647	2.39092e-13	-0.985316	3.03324e-07	2	Putative TraB family protein
MtrunA17_Chr3g0095111	Medtr3g053890	0	#N/A	-0.569784	0.0408469	0	#N/A	-1.07813	1.29805e-05	2	Putative transaminase
MtrunA17_Chr1g0170671	Medtr1g048970	-0.630391	0.000255589	-0.441487	0.0094353	-0.395132	0.0142104	-1.01145	2.94229e-11	2	Putative transcription coactivator Tc-PD family
MtrunA17_Chr2g0322731	Medtr2g088470	0	#N/A	0	#N/A	0	#N/A	-2.39811	2.21373e-08	2	Putative transcription factor & lipid binding HD-SAD family
MtrunA17_Chr4g0024351	Medtr4g047800	0	#N/A	0	#N/A	0	#N/A	-1.33936	0.00210356	2	Putative transcription factor & lipid binding HD-SAD family
MtrunA17_Chr3g0114761	Medtr3g072610	0	#N/A	0	#N/A	1.29562	0.000604707	-1.29504	0.00120458	2	Putative transcription factor AP2-EREBP family
MtrunA17_Chr4g0055951	Medtr4g100650	0	#N/A	-0.820444	8.66791e-05	-1.5654	8.00361e-16	-0.483263	0.0280317	2	Putative transcription factor AP2-EREBP family
MtrunA17_Chr5g0396741	Medtr5g009410	0	#N/A	-0.984645	2.30908e-05	-0.518842	0.0305294	-1.16758	3.63742e-07	2	Putative transcription factor AP2-EREBP family
MtrunA17_Chr6g0473961	Medtr6g465460	0	#N/A	0	#N/A	-1.52916	1.21922e-07	-0.788683	0.0107688	2	Putative transcription factor AP2-EREBP family
MtrunA17_Chr8g0378811	Medtr8g085960	0	#N/A	0	#N/A	-1.06221	0.00043358	0	#N/A	2	Putative transcription factor AP2-EREBP family	MtERN3	ERF required for nodulation-3
MtrunA17_Chr1g0207471	Medtr1g106420	-0.818676	0.00125647	-0.849331	0.000295197	-1.03412	2.81722e-06	-0.500763	0.0436028	2	Putative transcription factor AS2-LOB family	MtLBD1	LOB-like transcription factor 1
MtrunA17_Chr5g0437401	Medtr5g083010	0	#N/A	-0.772304	0.000410531	-0.57974	0.00659036	-1.40616	7.36672e-12	2	Putative transcription factor AS2-LOB family
MtrunA17_Chr7g0260971	Medtr7g096530	-0.706271	0.00292228	0	#N/A	-1.23423	2.08615e-10	-0.577737	0.00712216	2	Putative transcription factor AS2-LOB family	MtLBD16	LOB Domain protein 16
MtrunA17_Chr4g0033941	Medtr4g068300	0	#N/A	0	#N/A	-1.47955	2.32562e-05	-1.30668	0.00102776	2	Putative transcription factor B3-Domain family
MtrunA17_Chr4g0054581	Medtr0246s0020	0	#N/A	0	#N/A	-1.09234	0.0015949	0	#N/A	2	Putative transcription factor bHLH family
MtrunA17_Chr1g0185621	Medtr1g072320	-1.39829	0.00780104	0	#N/A	0	#N/A	0	#N/A	2	Putative transcription factor bHLH family	MtTT8	TRANSPARENT TESTA 8 (KM892777)
MtrunA17_Chr1g0207311	Medtr1g106470	0	#N/A	0	#N/A	-2.13336	1.53628e-08	-1.81228	5.09553e-06	2	Putative transcription factor bHLH family
MtrunA17_Chr2g0333621	Medtr2g104550	0	#N/A	-0.834598	0.000955077	-1.11774	1.76667e-06	-1.03055	1.39628e-05	2	Putative transcription factor bHLH family
MtrunA17_Chr3g0095391	Medtr3g449770	0	#N/A	0	#N/A	0	#N/A	-1.05896	2.48158e-06	2	Putative transcription factor bHLH family
MtrunA17_Chr3g0131771	Medtr3g498825	0	#N/A	-1.14998	0.00178832	0	#N/A	-1.82046	1.51773e-07	2	Putative transcription factor bHLH family
MtrunA17_Chr4g0041051	Medtr4g079760	-1.05291	0.00021198	0	#N/A	-0.525709	0.0475593	0	#N/A	2	Putative transcription factor bHLH family
MtrunA17_Chr4g0045901	Medtr4g087920	-1.0092	5.06511e-08	-0.65251	0.000393499	-0.802015	3.38784e-06	-0.480833	0.0107688	2	Putative transcription factor bHLH family
MtrunA17_Chr4g0049331	Medtr4g092700	0.763575	0.0245289	-1.60429	5.28611e-09	-1.20195	9.38061e-06	0	#N/A	2	Putative transcription factor bHLH family
MtrunA17_Chr5g0393721	Medtr5g005110	0	#N/A	0	#N/A	-1.75902	5.59634e-08	-0.98791	0.00466132	2	Putative transcription factor bHLH family
MtrunA17_Chr5g0400621	Medtr5g014520	0	#N/A	0	#N/A	0.998957	0.00802687	-1.16809	0.00270812	2	Putative transcription factor bHLH family	MtbHLH476	basic helix-loop-helix transcription factor 476
MtrunA17_Chr5g0437991	Medtr5g083810	0	#N/A	-0.876889	0.00212278	-1.55098	1.73998e-09	-1.82546	1.2324e-11	2	Putative transcription factor bHLH family
MtrunA17_Chr7g0252041	Medtr7g083900	0	#N/A	0	#N/A	0	#N/A	-1.10617	5.36581e-06	2	Putative transcription factor bHLH family
MtrunA17_Chr8g0365711	Medtr8g064700	0	#N/A	0	#N/A	-0.70278	0.0095646	-1.82846	2.08383e-11	2	Putative transcription factor bHLH family
MtrunA17_Chr1g0170581	Medtr1g048720	0	#N/A	0	#N/A	0	#N/A	-1.11015	0.00397496	2	Putative transcription factor bHLH family
MtrunA17_Chr8g0341311	Medtr8g015250	0	#N/A	-0.609285	0.0453889	-0.812064	0.002526	-1.24045	8.64934e-07	2	Putative transcription factor bZIP family
MtrunA17_Chr4g0071811	Medtr4g127420	0.855272	0.00546416	-1.8551	1.63078e-12	-2.57263	8.99883e-23	-1.16892	1.27345e-05	2	Putative transcription factor C2C2-CO-like family
MtrunA17_Chr8g0390971	Medtr8g104190	0	#N/A	-0.674462	0.00320017	-0.670266	0.0018779	-1.19151	1.19867e-08	2	Putative transcription factor C2C2-CO-like family	MtCOLi	constans-like (zinc finger protein)
MtrunA17_Chr7g0271861	Medtr7g112330	0	#N/A	-1.43555	1.18926e-09	-1.43805	4.87828e-10	-1.42178	1.15773e-09	2	Putative transcription factor C2C2-GATA family
MtrunA17_Chr1g0181921	Medtr1g067260	0	#N/A	-0.812957	1.43967e-05	-0.970519	6.50391e-08	-1.10365	1.33376e-09	2	Putative transcription factor C2H2 family
MtrunA17_Chr3g0123581	Medtr3g086630	-0.769842	0.0159038	-1.26005	2.00216e-06	-0.950885	0.000260425	-1.41948	4.99744e-08	2	Putative transcription factor C2H2 family
MtrunA17_Chr3g0104451	Medtr3g463310	-1.03313	1.79616e-05	0	#N/A	0	#N/A	0	#N/A	2	Putative transcription factor C2H2 family
MtrunA17_Chr6g0451991	Medtr6g008950	0	#N/A	-1.02247	5.6403e-06	-1.01442	2.65592e-06	0	#N/A	2	Putative transcription factor C2H2 family
MtrunA17_Chr5g0417501	#N/A	0	#N/A	-1.04123	0.000949638	-1.37688	2.5e-06	-0.803976	0.0110657	2	Putative transcription factor C2H2 family
MtrunA17_Chr1g0195851	Medtr1g088860	0	#N/A	-1.37453	2.38341e-07	-1.83923	9.14131e-14	0	#N/A	2	Putative transcription factor Hap3/NF-YB family	MtCbf4;MtNF-YB6	CAAT-box transcription factor 4;nuclear factor Y subunit B6
MtrunA17_Chr3g0132191	Medtr3g099180	-0.540111	0.00716963	-0.444228	0.0210509	0	#N/A	-1.03507	1.22405e-09	2	Putative transcription factor Hap3/NF-YB family	MtNF-YC3	nuclear factor Y subunit C3
MtrunA17_Chr3g0119291	Medtr3g080100	0.33214	0.0401796	-0.964413	2.13125e-14	-1.14898	1.11586e-20	-0.488035	0.000228017	2	Putative transcription factor Homobox-WOX family
MtrunA17_Chr1g0185131	Medtr1g071360	-0.551077	0.0235774	-1.23793	4.61477e-11	-1.53303	4.59154e-17	-1.0483	3.43304e-08	2	Putative transcription factor HSF-type-DNA-binding family
MtrunA17_Chr7g0260331	Medtr7g095680	0	#N/A	-0.969303	6.61799e-12	-1.06093	1.57032e-14	-0.475991	0.00161623	2	Putative transcription factor HSF-type-DNA-binding family
MtrunA17_Chr4g0069561	Medtr4g124300	0	#N/A	0	#N/A	-1.37167	8.50241e-06	0	#N/A	2	Putative transcription factor interactor and regulator AUX-IAA family
MtrunA17_Chr4g0002211	Medtr4g008050	1.44549	0.0179638	-2.22335	2.16989e-05	-2.74044	6.17102e-08	-1.31955	0.014052	2	Putative transcription factor interactor and regulator Znf-B family
MtrunA17_Chr2g0322971	#N/A	0	#N/A	-1.49762	0.00165696	-2.55484	9.90991e-09	-0.981657	0.0443934	2	Putative transcription factor interactor and regulator Znf-B family
MtrunA17_Chr5g0404951	Medtr5g021270	0	#N/A	0	#N/A	0	#N/A	-1.48166	0.000202808	2	Putative transcription factor MADS-MIKC family	MtTM6	TOMATO MADS BOX GENE6 (TM6)- like
MtrunA17_Chr2g0281071	Medtr2g011660	0	#N/A	-0.785402	0.02282	-1.75738	9.65689e-09	-1.38599	1.9661e-05	2	Putative transcription factor MYB-HB-like family	MtMYB053	Myeloblastosis (MYB) transcription factor 53
MtrunA17_Chr2g0323411	Medtr2g089620	-0.804024	0.00429985	-1.38484	3.05705e-09	-1.16942	4.01523e-07	-1.07021	7.87696e-06	2	Putative transcription factor MYB-HB-like family	MtMYB055	Myeloblastosis (MYB) transcription factor 55
MtrunA17_Chr5g0402631	Medtr5g017980	0.625895	0.0372416	0	#N/A	0	#N/A	-1.07634	1.80798e-05	2	Putative transcription factor MYB-HB-like family	MtNodGRP25	Nodule-specific Glycine-rich
MtrunA17_Chr5g0434911	Medtr5g079220	1.57292	0.0242392	-2.33925	7.98493e-05	-1.70745	0.0028931	0	#N/A	2	Putative transcription factor MYB-HB-like family	MtLAP4; MtMYB030	Legume Anthocyanin Production 4 (FJ199997); Myeloblastosis (MYB) transcription factor 30
MtrunA17_Chr7g0238741	Medtr7g061840	0.599103	0.0449005	-0.574548	0.0392486	0	#N/A	-1.2893	1.04521e-07	2	Putative transcription factor MYB-HB-like family
MtrunA17_Chr7g0258531	Medtr7g093010	0	#N/A	0	#N/A	-1.52116	6.20459e-07	-0.789983	0.0189222	2	Putative transcription factor MYB-HB-like family
MtrunA17_Chr7g0275911	Medtr7g117730	0	#N/A	0	#N/A	-1.08721	0.000954276	0	#N/A	2	Putative transcription factor MYB-HB-like family	MtMYB040	Myeloblastosis (MYB) transcription factor 40
MtrunA17_Chr1g0194951	#N/A	0	#N/A	-1.41708	0.000645932	-2.16216	3.56666e-08	0	#N/A	2	Putative transcription factor MYB-HB-like family
MtrunA17_Chr1g0183741	Medtr1g069805	0	#N/A	0	#N/A	0	#N/A	-1.56222	0.000672085	2	Putative transcription factor NAM family
MtrunA17_Chr4g0042561	Medtr4g081870	0	#N/A	0	#N/A	0	#N/A	-1.01063	0.000571774	2	Putative transcription factor NAM family	MtNAC969	NAC domain containing protein 969
MtrunA17_Chr7g0251651	Medtr7g083330	0	#N/A	-0.482628	0.0374498	-1.13716	7.91416e-09	-0.713111	0.000624134	2	Putative transcription factor NAM family
MtrunA17_Chr7g0261411	Medtr7g097090	0	#N/A	-0.616283	0.0305442	-0.90949	0.000356194	-1.5168	2.39354e-09	2	Putative transcription factor NAM family
MtrunA17_Chr5g0448621	Medtr5g099060	-1.16359	0.00454777	0	#N/A	0	#N/A	0	#N/A	2	Putative transcription factor Nin-like family	MtNIN	NODULE INCEPTION
MtrunA17_Chr7g0267101	Medtr7g105780	0	#N/A	0	#N/A	0	#N/A	-1.11951	5.80015e-05	2	Putative transcription factor OFP family
MtrunA17_Chr1g0155791	Medtr1g023230	0	#N/A	0	#N/A	-1.29347	1.11648e-06	0	#N/A	2	Putative transcription factor STY-LRP1 family	MtSTYL1	STY-like 1
MtrunA17_Chr2g0325171	Medtr2g090960	0	#N/A	0	#N/A	-0.623419	0.000195204	-1.05064	1.30971e-10	2	Putative transcription factor TCP family	MtTCP10A	TEOSINTE BRANCHED1 (TB1), CYCLOIDEA (CYC), PROLIFERATING CELL FACTORS 1&2 (PCF1 & 2) family
MtrunA17_Chr7g0220931	Medtr7g018500	0	#N/A	-1.08817	1.76398e-05	-0.55317	0.0339238	-1.42052	7.10634e-08	2	Putative transcription factor TCP family	MtCYC1; MtTCP1B	CYCLOIDEA1; TEOSINTE BRANCHED1 (TB1), CYCLOIDEA (CYC), PROLIFERATING CELL FACTORS 1&2 (PCF1 & 2) family
MtrunA17_Chr1g0164461	Medtr1g037650	0	#N/A	-0.705844	0.00273841	-1.16024	4.29262e-08	0	#N/A	2	Putative transcription factor Trihelix family	MtGT-2	trihelix transcription factor (GT) 2
MtrunA17_Chr3g0082261	Medtr3g014280	0	#N/A	-0.535865	0.015538	-1.21644	2.59287e-10	0	#N/A	2	Putative transcription factor Trihelix family	MtGT-18	trihelix transcription factor (GT) 18
MtrunA17_Chr8g0383351	Medtr8g092140	-1.02876	0.00275268	-0.830869	0.00837453	-1.50611	1.0704e-07	0	#N/A	2	Putative transcription factor WRKY family
MtrunA17_Chr6g0453221	Medtr6g012220	0	#N/A	-0.719141	0.00111577	-0.686601	0.00120646	-1.02222	1.75291e-06	2	Putative transcription factor ZF-HD family
MtrunA17_Chr8g0361671	Medtr8g467340	0	#N/A	-0.67898	0.00933444	-0.582942	0.01981	-1.28328	9.46167e-08	2	Putative transcription factor ZF-HD family
MtrunA17_Chr4g0014921	#N/A	0	#N/A	-0.823874	0.00238873	0	#N/A	-1.29949	2.44421e-07	2	Putative transcription regulator GNAT family
MtrunA17_Chr2g0296741	Medtr2g438010	-0.690199	0.0339936	-0.743615	0.00714018	-0.827296	0.00114042	-1.27498	4.76956e-07	2	Putative transcription regulator mTERF family
MtrunA17_Chr2g0287691	Medtr2g022140	0	#N/A	0	#N/A	-1.1516	3.73804e-06	0	#N/A	2	Putative transferase	MtIPT1;MtIPT4	isopentenyl transferase (MtIPT1, PMID:25804975)
MtrunA17_Chr2g0313871	Medtr2g072470	0	#N/A	-1.15753	3.31592e-12	-1.07286	5.56113e-11	-1.02755	9.66397e-10	2	Putative transferase
MtrunA17_Chr2g0323441	Medtr2g089665	0	#N/A	0	#N/A	0	#N/A	-1.54217	3.41773e-08	2	Putative transferase
MtrunA17_Chr3g0124341	Medtr3g087640	0	#N/A	0	#N/A	-1.46583	2.61231e-07	0	#N/A	2	Putative transferase
MtrunA17_Chr3g0095661	Medtr3g450510	0	#N/A	-1.31945	4.43647e-11	-1.5514	1.88958e-15	-1.67409	6.05392e-17	2	Putative transferase
MtrunA17_Chr8g0339641	Medtr8g012750	0	#N/A	-1.50415	0.000199662	-0.945945	0.0191108	0	#N/A	2	Putative transferase
MtrunA17_Chr8g0378151	#N/A	0	#N/A	0	#N/A	-1.29127	0.0225911	-3.20301	8.04404e-08	2	Putative transferase
MtrunA17_Chr6g0486531	Medtr6g088270	-0.529256	0.000896448	-0.808393	7.79481e-09	-0.956033	1.79147e-12	-1.10163	2.48812e-15	2	Putative translation elongation factor EFTs/EF1B, UBA-like superfamily, nucleic acid-binding protein
MtrunA17_Chr1g0173121	Medtr4g008630	0	#N/A	-0.750635	0.000110653	-0.601161	0.00157541	-1.14472	6.11721e-10	2	Putative trans-zeatin O-beta-D-glucosyltransferase
MtrunA17_Chr7g0265041	Medtr7g102450	0	#N/A	-2.37608	9.47183e-08	-2.51875	6.92313e-09	0	#N/A	2	Putative trans-zeatin O-beta-D-glucosyltransferase
MtrunA17_Chr7g0265101	Medtr7g102490	0	#N/A	-0.833499	0.00011369	-1.19444	3.5294e-09	-0.565857	0.0112916	2	Putative trans-zeatin O-beta-D-glucosyltransferase
MtrunA17_Chr2g0285001	Medtr2g017965	0	#N/A	-0.986164	0.000630224	0	#N/A	-1.27447	5.17974e-06	2	Putative triacylglycerol lipase
MtrunA17_Chr3g0099231	Medtr3g052580	0	#N/A	-0.465599	0.036798	-1.03649	8.29656e-08	-0.743234	0.000219906	2	Putative triacylglycerol lipase
MtrunA17_Chr3g0142941	Medtr3g114120	0	#N/A	0	#N/A	0	#N/A	-1.51915	0.000335595	2	Putative triacylglycerol lipase
MtrunA17_Chr8g0374101	Medtr8g079050	-1.38456	9.26221e-06	0	#N/A	0.670163	0.0257378	0	#N/A	2	Putative triacylglycerol lipase
MtrunA17_Chr7g0255071	Medtr7g088210	-0.706943	0.000459234	-1.213	2.03269e-13	-0.991695	9.68287e-10	-1.1668	1.46225e-12	2	Putative TTHA0068-like superfamily protein
MtrunA17_Chr8g0386581	Medtr8g097370	0	#N/A	0	#N/A	0	#N/A	-1.58454	5.03824e-09	2	Putative tubby-like protein
MtrunA17_Chr8g0386591	Medtr8g097380	0	#N/A	0	#N/A	0.848124	0.0138522	-1.27418	0.00026662	2	Putative tubby-like protein
MtrunA17_Chr4g0076241	Medtr4g133870	0	#N/A	-0.632251	0.00747534	-0.739113	0.000685999	-1.25085	2.01787e-09	2	Putative Two pore domain potassium channel, EF-hand domain pair, EF-Hand 1, calcium-binding protein
MtrunA17_Chr2g0302641	Medtr2g046160	-1.01807	1.72137e-13	-0.540671	0.000137118	0	#N/A	0	#N/A	2	Putative Ubiquitin-like domain,-like superfamily
MtrunA17_Chr1g0207831	Medtr1g107285	0	#N/A	-1.07742	5.06436e-05	-1.51016	1.84181e-09	0	#N/A	2	Putative UDP-glucuronosyl/UDP-glucosyltransferase, UDP-glycosyltransferase family
MtrunA17_Chr1g0207861	Medtr1g107315	0	#N/A	-2.218	1.65791e-13	-2.83526	3.74942e-21	-0.692127	0.036858	2	Putative UDP-glucuronosyl/UDP-glucosyltransferase, UDP-glycosyltransferase family
MtrunA17_Chr4g0066131	Medtr4g117890	0	#N/A	0	#N/A	-1.02503	2.11198e-07	0	#N/A	2	Putative UDP-glucuronosyl/UDP-glucosyltransferase, UDP-glycosyltransferase family
MtrunA17_Chr4g0044511	Medtr4g485630	0	#N/A	-0.608669	0.00578433	-1.13533	7.75687e-09	-0.660734	0.00180776	2	Putative UDP-glucuronosyl/UDP-glucosyltransferase, UDP-glycosyltransferase family
MtrunA17_Chr5g0448521	Medtr5g098930	-0.59717	0.0458582	-0.902009	0.000269782	-0.743345	0.0021334	-1.3869	4.28002e-09	2	Putative UDP-glucuronosyl/UDP-glucosyltransferase, UDP-glycosyltransferase family
MtrunA17_Chr6g0463851	Medtr6g035185	0	#N/A	0	#N/A	0	#N/A	-1.74923	4.83382e-05	2	Putative UDP-glucuronosyl/UDP-glucosyltransferase, UDP-glycosyltransferase family
MtrunA17_Chr8g0380531	Medtr8g088560	0	#N/A	-1.0877	0.00815307	0	#N/A	-1.9088	3.02618e-07	2	Putative UDP-glucuronosyl/UDP-glucosyltransferase, UDP-glycosyltransferase family
MtrunA17_Chr1g0209881	Medtr1g110930	0	#N/A	0	#N/A	0	#N/A	-2.93781	1.58825e-06	2	Putative very-long-chain 3-oxoacyl-CoA synthase
MtrunA17_Chr4g0030601	Medtr4g062270	0	#N/A	0	#N/A	-0.584914	0.00399697	-1.36538	2.15798e-11	2	Putative very-long-chain 3-oxoacyl-CoA synthase
MtrunA17_Chr7g0275111	Medtr7g116630	-0.575017	0.0105338	-1.2111	6.99179e-11	-1.14932	2.82426e-10	-1.50982	6.58606e-16	2	Putative violaxanthin de-epoxidase
MtrunA17_Chr1g0155321	Medtr1g022380	-0.490625	0.0245289	-0.458422	0.0222508	-0.427304	0.0231671	-1.11388	5.68242e-10	2	Putative virus X resistance protein-like, coiled-coil
MtrunA17_Chr1g0160341	Medtr1g030770	0.421715	0.0209319	-0.980453	2.88531e-11	-1.05882	1.81742e-13	-0.621394	4.18275e-05	2	Putative virus X resistance protein-like, coiled-coil
MtrunA17_Chr3g0101011	Medtr3g055930	0	#N/A	-0.647057	0.000332128	0	#N/A	-1.12608	8.7172e-12	2	Putative virus X resistance protein-like, coiled-coil
MtrunA17_Chr6g0468121	Medtr6g046480	-0.650719	0.0498313	0	#N/A	-1.06734	7.25921e-05	0	#N/A	2	Putative virus X resistance protein-like, coiled-coil
MtrunA17_Chr7g0271981	Medtr7g112440	-0.979957	0.0298564	0	#N/A	-1.07873	0.0003123	0	#N/A	2	Putative wall-associated receptor kinase, galacturonan-binding domain-containing protein
MtrunA17_Chr8g0369191	Medtr8g070840	-2.24019	6.36284e-06	-2.16207	4.14999e-09	-1.93839	4.54696e-08	-1.78631	5.67465e-07	2	Putative WEB family protein
MtrunA17_Chr5g0432191	Medtr5g074500	0	#N/A	0	#N/A	-2.1302	8.64261e-11	-1.62053	9.54613e-07	2	Putative wound-induced protein Wun1
MtrunA17_Chr7g0244171	Medtr7g071760	0	#N/A	0	#N/A	-1.62211	0.0016577	0	#N/A	2	Putative wound-induced protein Wun1
MtrunA17_Chr6g0461731	Medtr6g033055	0	#N/A	0	#N/A	0	#N/A	-1.4897	0.00592455	2	Putative xyloglucan:xyloglucosyl transferase
MtrunA17_Chr4g0054451	Medtr4g097700	-1.15646	0.00240829	-1.42748	1.77055e-05	-1.05381	0.00134912	-2.35629	2.0402e-11	2	Putative xyloglucan:xyloglucosyl transferase, Xyloglucan-specific endo-beta-1,4-glucanase
MtrunA17_Chr6g0470371	#N/A	0	#N/A	-1.31999	3.80728e-06	-0.632018	0.0297441	-1.14933	2.29189e-05	2	Putative YrdC-like domain, DHBP synthase RibB-like alpha/beta domain superfamily
MtrunA17_Chr4g0055191	Medtr4g099050	0	#N/A	0	#N/A	-0.802466	0.0287695	1.20905	0.000811811	2	Putative Zf-FLZ domain-containing protein
MtrunA17_Chr2g0306881	Medtr2g054750	0	#N/A	0	#N/A	-0.898001	0.00603231	-1.16169	0.000778333	2	Putative Zinc finger, RanBP2-type
MtrunA17_Chr1g0181961	Medtr1g067330	-0.752403	0.000215217	-0.731968	9.69315e-05	-0.569016	0.00203192	-1.01674	2.30125e-08	2	Putative zinc- or iron-chelating domain containing protein
MtrunA17_Chr3g0120361	Medtr3g082050	0	#N/A	0	#N/A	-0.718348	0.000462269	-1.00907	9.41648e-07	2	Putative zinc/iron permease	MtZIP4	Zinc-Iron Permease 4
MtrunA17_Chr1g0192921	Medtr1g084200	0	#N/A	0	#N/A	0	#N/A	-1.69746	0.00240187	2	Putative-like superfamily protein
MtrunA17_Chr4g0042211	Medtr4g081560	0	#N/A	-0.400438	0.00940855	-1.04255	4.34024e-15	-0.372375	0.0128224	2	Putative-like superfamily protein
MtrunA17_Chr5g0422041	Medtr0021s0160	-1.78019	0.00614636	0	#N/A	0	#N/A	0	#N/A	2	#N/A
MtrunA17_Chr5g0422081	Medtr0021s0160	-1.86057	0.00183219	1.33064	0.022761	0	#N/A	0	#N/A	2	#N/A
MtrunA17_Chr5g0422271	Medtr0052s0070	-2.05881	0.00215955	0	#N/A	0	#N/A	0	#N/A	2	#N/A
MtrunA17_Chr5g0422291	Medtr0052s0070	-1.81393	0.00341158	1.21805	0.0467519	0	#N/A	0	#N/A	2	#N/A
MtrunA17_Chr0c01g0489041	Medtr0052s0110	-3.84898	2.51374e-05	0	#N/A	0	#N/A	0	#N/A	2	#N/A
MtrunA17_Chr0c01g0489101	Medtr0055s0100	-1.9206	0.00514935	1.52239	0.0207353	0	#N/A	0	#N/A	2	#N/A
MtrunA17_Chr4g0016121	Medtr4g006040	-2.24486	0.00143312	0	#N/A	0	#N/A	0	#N/A	2	#N/A
MtrunA17_Chr5g0425621	Medtr5g062900	0	#N/A	0	#N/A	-1.71717	3.17491e-06	-1.63339	2.67643e-05	2	#N/A
MtrunA17_Chr1g0204881	#N/A	-1.5004	0.0096545	0	#N/A	0	#N/A	0	#N/A	2	#N/A	7SL RNA-3	7SL RNA
MtrunA17_Chr3g1013716	#N/A	0	#N/A	0	#N/A	-1.5154	3.92502e-05	-1.74449	1.14231e-05	2	#N/A
MtrunA17_Chr1g0173321	#N/A	0	#N/A	0	#N/A	0	#N/A	-1.04025	0.00095514	2	#N/A
MtrunA17_Chr2g0326971	#N/A	0	#N/A	0	#N/A	0	#N/A	-1.20949	2.7319e-11	2	#N/A
MtrunA17_Chr8g1038239	#N/A	0	#N/A	0	#N/A	0	#N/A	-1.57261	3.56367e-08	2	#N/A
MtrunA17_Chr8g0379751	#N/A	0	#N/A	-0.942069	0.00742366	0	#N/A	-1.65852	3.65689e-07	2	#N/A
MtERN1	#N/A	0	#N/A	0	#N/A	-1.10367	0.000416741	0	#N/A	2	#N/A
MtrunA17_Chr7g0252751	#N/A	0	#N/A	0	#N/A	-1.046	0.00123947	0	#N/A	2	#N/A
MtrunA17_Chr4g0074181	#N/A	0	#N/A	0	#N/A	-1.33991	0.000263746	0	#N/A	2	#N/A
MtrunA17_Chr7g0252741	#N/A	0	#N/A	-0.71131	0.0334974	-1.16563	8.37827e-05	0	#N/A	2	#N/A
MtrunA17_Chr3g1013261	#N/A	0	#N/A	-0.931031	0.000244212	-1.54932	3.77131e-11	0	#N/A	2	#N/A
MtrunA17_MTg0491231	#N/A	-1.60834	0.00145365	0	#N/A	0	#N/A	0	#N/A	2	#N/A
MtrunA17_MTg0490131	#N/A	-1.57027	0.00350856	0	#N/A	0	#N/A	0	#N/A	2	#N/A
MtrunA17_CPg0492331	#N/A	-2.00584	0.00407674	0	#N/A	0	#N/A	0	#N/A	2	#N/A
MtrunA17_Chr5g0422161	#N/A	-1.62917	0.00636458	1.31514	0.0213995	0	#N/A	0	#N/A	2	#N/A
MtrunA17_Chr5g0441791	#N/A	-2.08812	0.000476652	1.39015	0.0194947	0	#N/A	0	#N/A	2	#N/A
MtrunA17_Chr5g0422251	#N/A	-3.01014	0.000250225	1.70752	0.0352178	0	#N/A	0	#N/A	2	#N/A
MtrunA17_Chr5g0422331	#N/A	-2.85917	0.000566366	1.70607	0.0367725	0	#N/A	0	#N/A	2	#N/A
MtrunA17_Chr5g0421901	#N/A	-2.60168	0.000468337	1.67088	0.0225473	0	#N/A	0	#N/A	2	#N/A
MtrunA17_Chr5g0421861	#N/A	-2.38308	0.000189698	1.8381	0.00290089	0	#N/A	0	#N/A	2	#N/A
MtrunA17_Chr5g0441681	#N/A	-2.1921	0.00681594	1.72109	0.0268235	0	#N/A	0	#N/A	2	#N/A
MtrunA17_Chr7g0214191	Medtr7g405730	0	#N/A	0	#N/A	0	#N/A	1.31924	0.00529357	3	Bidirectional sugar transporter N3	MtSWEET15c;MtN3	probable Sucrose transporter;Mt nodulin 3
MtrunA17_Chr1g0152201	Medtr1g017500	0.977875	0.0429749	2.3095	1.15508e-10	1.88418	4.76649e-08	0.872674	0.0200897	3	hypothetical protein
MtrunA17_Chr1g0152221	Medtr1g017530	1.59504	5.68789e-05	0.795765	0.00643049	0	#N/A	0	#N/A	3	hypothetical protein
MtrunA17_Chr1g0154861	Medtr1g022080	0	#N/A	0	#N/A	1.72871	0.00417572	2.16086	0.000491207	3	hypothetical protein
MtrunA17_Chr1g0159601	Medtr1g029600	0	#N/A	2.06024	2.93723e-13	2.19285	2.38606e-15	0.963087	0.00110662	3	hypothetical protein
MtrunA17_Chr1g0181951	Medtr1g067320	0	#N/A	1.59756	5.1481e-20	1.78105	2.18295e-25	0.800917	6.74777e-06	3	hypothetical protein
MtrunA17_Chr1g0190491	Medtr1g080510	0	#N/A	2.11117	3.10178e-08	2.46244	6.46857e-12	0	#N/A	3	hypothetical protein	MtIDA31	Inflorescence Deficient in Abscission
MtrunA17_Chr1g0198951	Medtr1g093985	1.31665	0.00104917	0	#N/A	0	#N/A	0	#N/A	3	hypothetical protein
MtrunA17_Chr1g0200151	Medtr1g095730	1.63853	0.00730778	2.09388	7.46374e-05	2.48889	9.7111e-07	2.03569	0.000126615	3	hypothetical protein
MtrunA17_Chr2g0279541	Medtr2g009450	1.73442	0.000196455	0	#N/A	0	#N/A	0	#N/A	3	hypothetical protein
MtrunA17_Chr2g0285421	Medtr2g018670	0.61359	0.0230823	1.21679	3.16893e-08	1.59736	4.90592e-14	1.05159	2.07921e-06	3	hypothetical protein
MtrunA17_Chr2g0288321	Medtr2g023010	0	#N/A	0	#N/A	1.12305	2.99046e-10	1.29621	8.6764e-13	3	hypothetical protein
MtrunA17_Chr2g0292821	Medtr2g030845	0	#N/A	0	#N/A	0	#N/A	2.10791	0.0079625	3	hypothetical protein	MtRC4	Root Cap 4
MtrunA17_Chr2g0315311	Medtr2g075570	1.25738	0.00467978	2.05161	3.499e-08	2.52283	2.65623e-12	1.55951	4.75318e-05	3	hypothetical protein
MtrunA17_Chr2g0315321	Medtr2g075590	0.89828	0.00702208	1.87315	2.11266e-11	2.64739	7.53554e-22	1.01465	0.000453612	3	hypothetical protein
MtrunA17_Chr2g0315811	Medtr2g076460	0	#N/A	0	#N/A	0	#N/A	1.48289	1.17e-06	3	hypothetical protein
MtrunA17_Chr2g0330581	Medtr2g100440	0.752687	1.39674e-05	1.13373	5.86302e-14	1.43841	9.71378e-23	1.27247	2.3933e-17	3	hypothetical protein
MtrunA17_Chr3g0082831	Medtr3g015430	0	#N/A	2.31234	8.82229e-10	2.30566	1.80985e-10	0	#N/A	3	hypothetical protein	MtPSN1	peptide suppressing nodulation
MtrunA17_Chr3g0083071	Medtr3g015830	0	#N/A	0	#N/A	0	#N/A	1.33192	4.46398e-06	3	hypothetical protein	MtIDA33	Inflorescence Deficient in Abscission
MtrunA17_Chr3g0083271	Medtr3g016080	0	#N/A	0	#N/A	0	#N/A	1.0982	5.61067e-06	3	hypothetical protein	MtIDA34	Inflorescence Deficient in Abscission
MtrunA17_Chr3g0083381	Medtr3g016275	1.82596	5.31376e-07	0	#N/A	0	#N/A	0	#N/A	3	hypothetical protein
MtrunA17_Chr3g0115221	Medtr3g073330	0	#N/A	1.31604	4.27283e-09	2.01065	1.12172e-20	0.843212	0.00029206	3	hypothetical protein
MtrunA17_Chr3g0119861	Medtr3g080860	0	#N/A	0	#N/A	1.99539	8.97427e-05	2.09616	5.20157e-05	3	hypothetical protein
MtrunA17_Chr3g0123761	Medtr3g086890	0	#N/A	0.811187	0.0189733	1.89387	5.74784e-10	1.4512	3.62311e-06	3	hypothetical protein
MtrunA17_Chr3g0127841	Medtr3g092630	0	#N/A	1.03455	0.000189937	1.91458	1.02525e-13	0.705661	0.0137966	3	hypothetical protein
MtrunA17_Chr3g0141671	Medtr3g111970	1.7185	8.15813e-06	1.28899	0.00063243	2.07633	3.82123e-09	2.99325	3.89076e-16	3	hypothetical protein
MtrunA17_Chr4g0019001	Medtr4g036990	1.99639	3.27831e-05	0	#N/A	0	#N/A	0	#N/A	3	hypothetical protein
MtrunA17_Chr4g0021961	Medtr4g046147	0	#N/A	1.70285	2.84317e-19	1.89281	3.53679e-24	0.505495	0.0163207	3	hypothetical protein
MtrunA17_Chr4g0039681	Medtr4g077777	0	#N/A	1.23135	1.10569e-11	1.96097	7.57342e-29	0.924127	5.42056e-07	3	hypothetical protein
MtrunA17_Chr4g0042781	Medtr4g082355	0	#N/A	0.797668	0.000440994	1.84415	9.13328e-19	0.830386	0.000184453	3	hypothetical protein
MtrunA17_Chr4g0042791	Medtr4g082360	0	#N/A	1.97792	1.76093e-09	2.63746	4.36936e-16	1.30302	0.000103067	3	hypothetical protein
MtrunA17_Chr4g0044281	Medtr4g084970	0	#N/A	0	#N/A	0	#N/A	1.05623	2.78871e-05	3	hypothetical protein
MtrunA17_Chr4g0059511	Medtr4g106500	0.960495	0.0070977	3.05856	7.81346e-23	3.61014	1.0941e-30	1.16339	0.000227417	3	hypothetical protein
MtrunA17_Chr4g0065221	Medtr4g116530	0	#N/A	1.11912	0.000798934	2.60641	3.55457e-17	0.76371	0.0276216	3	hypothetical protein
MtrunA17_Chr4g0071041	Medtr4g126020	0	#N/A	1.34848	2.60192e-08	1.66443	1.19353e-12	0.550301	0.0398591	3	hypothetical protein
MtrunA17_Chr5g0401701	Medtr5g016450	0.483416	0.0110748	0.541164	0.00167712	0.90185	7.85789e-09	1.40797	7.70758e-19	3	hypothetical protein
MtrunA17_Chr5g0404581	Medtr5g020860	0	#N/A	1.77361	2.11071e-12	2.4472	3.34488e-23	0.672346	0.0135881	3	hypothetical protein
MtrunA17_Chr5g0436131	Medtr5g081360	0	#N/A	0	#N/A	3.42516	1.86274e-17	1.1343	0.00671435	3	hypothetical protein
MtrunA17_Chr5g0441841	Medtr5g089580	0	#N/A	0	#N/A	0	#N/A	1.05203	0.00127047	3	hypothetical protein
MtrunA17_Chr5g0444381	Medtr5g093050	0	#N/A	1.88765	1.90525e-11	2.00378	1.06518e-13	0.947889	0.0013582	3	hypothetical protein
MtrunA17_Chr6g0452101	Medtr6g009097	1.00606	4.28008e-05	0	#N/A	0	#N/A	0	#N/A	3	hypothetical protein
MtrunA17_Chr6g0457701	Medtr6g018690	0	#N/A	2.13291	5.4831e-21	2.49512	1.57971e-28	0.796385	0.000860494	3	hypothetical protein
MtrunA17_Chr6g0479131	Medtr6g071040	1.05019	0.00241774	1.66567	5.57697e-08	2.16162	3.19492e-13	0.99883	0.00172874	3	hypothetical protein
MtrunA17_Chr4g0018971	Medtr7g028465	0	#N/A	1.94797	1.69257e-06	1.93895	8.12735e-07	1.186	0.00465207	3	hypothetical protein
MtrunA17_Chr7g0240021	Medtr7g064050	0	#N/A	0	#N/A	1.66814	1.41414e-07	0.987907	0.00329904	3	hypothetical protein
MtrunA17_Chr7g0240041	Medtr7g064070	0.858476	0.0203951	0	#N/A	1.92121	2.16456e-10	0.889984	0.00776157	3	hypothetical protein
MtrunA17_Chr7g0253451	Medtr7g085850	0	#N/A	0	#N/A	3.07535	3.69584e-12	0	#N/A	3	hypothetical protein
MtrunA17_Chr7g0274321	Medtr7g115360	0	#N/A	0.925854	0.000889309	2.16886	1.14865e-17	0.623082	0.0292449	3	hypothetical protein	MtIDA35	Inflorescence Deficient in Abscission
MtrunA17_Chr8g0346681	Medtr8g027430	0	#N/A	0	#N/A	0	#N/A	2.00673	1.47191e-05	3	hypothetical protein
MtrunA17_Chr8g0348861	Medtr8g030733	0	#N/A	0	#N/A	0	#N/A	1.67981	6.34631e-20	3	hypothetical protein
MtrunA17_Chr8g0367291	Medtr8g068450	0	#N/A	1.82198	1.59744e-08	1.87549	2.43675e-09	1.06084	0.001565	3	hypothetical protein	MtPRP669_14	Pro-rich Protein Group 669
MtrunA17_Chr8g0367901	Medtr8g069350	1.11924	0.00272726	0	#N/A	0	#N/A	0	#N/A	3	hypothetical protein
MtrunA17_Chr8g0368881	Medtr8g070055	1.4078	0.0027318	0	#N/A	0	#N/A	0	#N/A	3	hypothetical protein
MtrunA17_Chr8g0372921	Medtr8g077145	0	#N/A	2.62267	1.50029e-21	2.81729	5.91199e-25	1.23013	9.94317e-06	3	hypothetical protein
MtrunA17_Chr8g0390581	Medtr8g083450	0	#N/A	1.00822	0.00837813	1.82683	1.37488e-07	0.939958	0.0124964	3	hypothetical protein
MtrunA17_Chr8g0382821	Medtr8g091590	0	#N/A	0	#N/A	1.16638	0.00033133	1.57298	1.36991e-06	3	hypothetical protein
MtrunA17_Chr8g0391091	Medtr8g104290	0	#N/A	1.54263	1.81927e-17	1.94994	7.1519e-28	1.32479	3.0035e-13	3	hypothetical protein
MtrunA17_Chr6g0462271	#N/A	0	#N/A	3.26546	1.32967e-16	3.79929	1.36364e-21	3.95956	1.0421e-20	3	hypothetical protein
MtrunA17_Chr4g0062211	#N/A	0	#N/A	2.17678	1.2978e-12	3.18116	5.11033e-25	1.2089	0.000116667	3	hypothetical protein
MtrunA17_Chr4g0048031	#N/A	0.917049	0.00199894	1.91525	3.30445e-13	2.66724	8.2511e-25	0	#N/A	3	hypothetical protein
MtrunA17_Chr8g0367841	#N/A	0	#N/A	0.800685	0.00262183	2.28866	3.19265e-21	0.642979	0.0168472	3	hypothetical protein
MtrunA17_Chr3g0088071	#N/A	0	#N/A	0	#N/A	2.26279	6.27569e-16	0.834471	0.00647225	3	hypothetical protein
MtrunA17_Chr8g0390591	#N/A	0	#N/A	1.265	0.00134574	1.922	1.90427e-07	0.968777	0.0153108	3	hypothetical protein
MtrunA17_Chr3g0103901	#N/A	0	#N/A	1.65212	3.05309e-12	1.87749	8.13659e-17	1.40117	8.95588e-10	3	hypothetical protein
MtrunA17_Chr4g0058501	#N/A	0	#N/A	0	#N/A	1.67917	0.000701658	1.77562	0.00046948	3	hypothetical protein
MtrunA17_Chr6g0484081	#N/A	0	#N/A	2.58406	3.45083e-20	1.63561	2.29588e-11	1.15685	3.70023e-06	3	hypothetical protein
MtrunA17_Chr1g0180921	#N/A	0.825471	0.0419872	0	#N/A	1.61087	1.61677e-06	1.76588	5.79331e-08	3	hypothetical protein
MtrunA17_Chr7g0265881	#N/A	0	#N/A	0	#N/A	1.25856	0.00493631	1.211	0.00944301	3	hypothetical protein
MtrunA17_Chr2g0284231	#N/A	0	#N/A	0.79571	0.0376034	1.09269	0.00136741	2.08276	4.9403e-10	3	hypothetical protein
MtrunA17_Chr3g0127721	#N/A	0	#N/A	0	#N/A	0.851103	1.12418e-07	1.17134	6.60245e-13	3	hypothetical protein
MtrunA17_Chr1g0210331	#N/A	0.781883	0.00863462	0.758835	0.0076946	0.700771	0.00879696	1.06124	2.17168e-05	3	hypothetical protein
MtrunA17_Chr7g0253041	#N/A	0.708887	0.0197669	0	#N/A	0.693785	0.00819704	1.14093	8.48651e-06	3	hypothetical protein
MtrunA17_Chr1g0202881	#N/A	0	#N/A	0	#N/A	0.615974	0.000337346	1.01478	3.42594e-09	3	hypothetical protein
MtrunA17_Chr5g0417351	#N/A	0	#N/A	0	#N/A	0	#N/A	1.53729	0.000625582	3	hypothetical protein
MtrunA17_Chr2g0315831	#N/A	0	#N/A	0	#N/A	0	#N/A	1.49325	1.43037e-05	3	hypothetical protein
MtrunA17_Chr3g0087441	#N/A	0	#N/A	0	#N/A	0	#N/A	1.89612	0.00258176	3	hypothetical protein
MtrunA17_Chr5g0409131	#N/A	0	#N/A	0	#N/A	0	#N/A	2.10052	0.000716988	3	hypothetical protein
MtrunA17_Chr6g0480891	#N/A	0	#N/A	0.942679	0.0195458	0	#N/A	1.414	0.000115422	3	hypothetical protein
MtrunA17_Chr4g0006071	#N/A	1.48609	0.00997701	0	#N/A	0	#N/A	0	#N/A	3	hypothetical protein
MtrunA17_Chr2g0299441	#N/A	1.00489	0.00251277	0	#N/A	0	#N/A	1.16669	0.000113798	3	hypothetical protein
MtrunA17_Chr3g0083371	#N/A	1.81574	0.00220279	1.16944	0.0481648	0	#N/A	1.48019	0.00734057	3	hypothetical protein
MtrunA17_Chr4g0052861	Medtr4g094775	0.767959	5.5638e-05	1.75469	8.96135e-25	1.88626	7.7414e-29	0.95981	3.86434e-08	3	Isoflavone 2'-hydroxylase	MtCYP81E7	Isoflavone 2'-hydroxylase
MtrunA17_Chr4g0046341	Medtr4g088190	0	#N/A	2.392	3.11213e-18	2.40661	7.81989e-19	1.00804	0.000406662	3	Isoflavone 4'-O-methyltransferase
MtrunA17_Chr7g0245631	Medtr7g074710	0	#N/A	1.78523	5.52559e-24	1.81423	2.92896e-25	0.975578	6.77841e-08	3	Putative (3R)-2'-hydroxyisoflavanone reductase	MtVRC1	vestitone reductase cluster gene 1
MtrunA17_Chr4g0046321	Medtr4g088160	0	#N/A	2.01271	1.09873e-12	2.14344	1.42254e-14	0.944063	0.00149133	3	Putative 2-hydroxyisoflavanone synthase
MtrunA17_Chr5g0404481	Medtr5g020760	0.927315	0.00117795	2.80079	4.25063e-28	2.73633	1.87578e-27	1.28073	5.03275e-07	3	Putative 2'-hydroxyisoflavone reductase
MtrunA17_Chr5g0404511	Medtr5g020800	0.94195	0.000176716	1.97193	1.3327e-18	1.63217	1.40741e-13	0.730199	0.00226547	3	Putative 2'-hydroxyisoflavone reductase	MtIFR	isoflavone reductase
MtrunA17_Chr4g0034461	Medtr4g069070	0.931256	0.00766257	2.0085	2.13999e-15	2.14294	1.49552e-18	1.75885	2.01266e-12	3	Putative 4-hydroxy-3-methylbut-2-enyl diphosphate reductase
MtrunA17_Chr4g0052541	Medtr4g094700	0	#N/A	0	#N/A	0	#N/A	1.4047	3.28143e-10	3	Putative 6,7-dimethyl-8-ribityllumazine synthase
MtrunA17_Chr3g0121001	Medtr3g083130	0	#N/A	1.64958	5.01482e-12	1.63292	3.58993e-12	1.03369	2.62882e-05	3	Putative 6'-deoxychalcone synthase
MtrunA17_Chr5g0447951	Medtr5g097910	1.35972	8.25209e-06	2.32759	1.19891e-16	2.18615	2.5299e-15	0.632108	0.0431132	3	Putative 6'-deoxychalcone synthase
MtrunA17_Chr5g0447961	Medtr5g097940	1.34004	0.000215724	2.69621	2.71037e-16	2.37303	1.87876e-13	0.93206	0.00746675	3	Putative 6'-deoxychalcone synthase
MtrunA17_Chr6g0452451	Medtr6g009720	0	#N/A	0	#N/A	0	#N/A	1.19077	0.00105439	3	Putative AAA+ ATPase domain, ATPase, AAA-type, core, AAA-type ATPase domain-containing protein
MtrunA17_Chr2g0314301	Medtr2g072820	0	#N/A	0	#N/A	1.308	0.00010138	1.1325	0.000920395	3	Putative AAA+ ATPase domain, P-loop containing nucleoside triphosphate hydrolase
MtrunA17_Chr6g0480981	Medtr6g075950	0	#N/A	1.99431	3.23738e-17	2.25514	2.86962e-22	0.646482	0.0111718	3	Putative AAA+ ATPase domain, P-loop containing nucleoside triphosphate hydrolase, TIR
MtrunA17_Chr6g0464351	Medtr6g037220	1.00543	0.0182194	2.2447	1.93626e-10	1.80436	1.95052e-07	0	#N/A	3	Putative ABA/WDS induced protein
MtrunA17_Chr7g0262241	Medtr7g098760	-0.582224	0.000468337	0	#N/A	0	#N/A	1.1156	1.67116e-14	3	Putative ABC-type ferric hydroxamate transporter	MtABCG39	ATP-binding cassette (ABC) transporter type G
MtrunA17_Chr2g0332221	Medtr2g102660	0	#N/A	2.73779	2.04107e-13	3.1245	3.61969e-17	1.46554	0.000104036	3	Putative ABC-type maltose transporter	MtABCG11	ATP-binding cassette (ABC) transporter type G (XM_003597770)
MtrunA17_Chr2g0332241	Medtr2g102670	0	#N/A	2.13758	7.00906e-20	2.38794	1.13563e-24	1.13634	2.03157e-06	3	Putative ABC-type maltose transporter	MtABCG10	ATP-binding cassette (ABC) transporter type G (XM_003597771)
MtrunA17_Chr1g0167741	Medtr1g043220	0	#N/A	0	#N/A	3.58946	9.5749e-07	2.06369	0.00570975	3	Putative ABC-type phosphate transporter	MtPT1	phosphate transporter
MtrunA17_Chr3g0120761	Medtr3g082700	0	#N/A	2.5377	3.4766e-10	2.64022	2.56351e-11	1.10345	0.00907151	3	Putative ABC-type phosphate transporter	MtPT6	phosphate transporter
MtrunA17_Chr2g0332211	Medtr2g102640	0	#N/A	1.25991	7.83761e-11	1.95402	8.07116e-25	0.976177	7.30658e-07	3	Putative ABC-type sulfate transporter	MtABCG9	ATP-binding cassette (ABC) transporter type G (XM_003597768)
MtrunA17_Chr4g0050291	Medtr4g094010	0	#N/A	1.20711	1.87277e-11	1.79509	2.42212e-24	0.956255	1.70697e-07	3	Putative ABC-type xenobiotic transporter
MtrunA17_Chr6g0452111	Medtr6g009110	0	#N/A	0	#N/A	0	#N/A	1.38607	9.13274e-07	3	Putative ABC-type xenobiotic transporter	MtABAB26	ATP-Binding-Cassette (ABC) transporter typeB (P-glycoprotein (MDR/PGP/ABCB) efflux/conditional auxin transporter)
MtrunA17_Chr6g0474071	Medtr6g465300	0	#N/A	0	#N/A	0	#N/A	1.01468	4.90412e-10	3	Putative ABC-type xenobiotic transporter
MtrunA17_Chr1g0211041	Medtr1g112630	0	#N/A	1.62675	1.38542e-06	1.66017	2.99743e-07	1.23163	0.000290739	3	Putative Acid phosphatase
MtrunA17_Chr5g0395431	Medtr5g007640	0.566201	0.04651	1.46369	1.19232e-10	1.29617	7.15772e-09	0.555837	0.0274241	3	Putative acid--thiol ligase	Mt4CL-2	4-coumarate--CoA ligase 2
MtrunA17_Chr4g0053311	Medtr4g094918	0	#N/A	0	#N/A	0.814243	0.000191387	1.14543	1.11318e-07	3	Putative actinidain
MtrunA17_Chr7g0242601	Medtr7g068780	0	#N/A	1.43413	6.2132e-08	2.65576	2.14157e-24	0.877719	0.00143624	3	Putative acyl-lipid Delta(12)-acetylenase
MtrunA17_Chr4g0021211	Medtr0001s0660	0.924808	5.54129e-05	2.11565	2.0648e-24	2.2501	8.4574e-28	0.51679	0.0249948	3	Putative alcohol dehydrogenase
MtrunA17_Chr3g0125911	Medtr3g089940	0	#N/A	0	#N/A	0	#N/A	1.89098	7.05194e-05	3	Putative alcohol dehydrogenase	MtADH	alcohol dehydrogenase
MtrunA17_Chr3g0125941	Medtr3g089970	0	#N/A	0	#N/A	2.41426	2.35785e-05	3.09544	1.31648e-07	3	Putative alcohol dehydrogenase
MtrunA17_Chr7g0242291	Medtr7g068320	0.585683	0.00367687	1.44682	1.67016e-17	1.32149	3.40339e-15	1.14491	3.75825e-11	3	Putative alcohol dehydrogenase
MtrunA17_Chr5g0402841	Medtr5g018280	1.32336	0.0367735	2.80279	2.23267e-07	2.4643	2.70901e-06	0	#N/A	3	Putative alpha/beta hydrolase-1
MtrunA17_Chr3g0104871	Medtr3g464040	0	#N/A	-0.672112	0.000257058	0.450666	0.0140637	1.02223	4.76532e-09	3	Putative alpha/beta hydrolase-1, epoxide hydrolase
MtrunA17_Chr1g0153391	Medtr1g019440	0	#N/A	0	#N/A	0.859842	0.00520811	1.10636	0.000321118	3	Putative alpha-amylase
MtrunA17_Chr1g0188761	Medtr1g077520	3.12507	1.33837e-08	0	#N/A	0	#N/A	0	#N/A	3	Putative alpha-galactosidase
MtrunA17_Chr1g0191461	Medtr1g082390	0	#N/A	0	#N/A	0	#N/A	1.09537	0.00335636	3	Putative alpha-L-fucosidase
MtrunA17_Chr1g0188871	Medtr1g077660	1.03187	6.52205e-06	0	#N/A	0	#N/A	0	#N/A	3	Putative aluminum-activated malate transporter
MtrunA17_Chr1g0198081	Medtr1g492640	0	#N/A	1.36458	5.51145e-17	2.21662	8.86244e-42	0.638278	0.000211314	3	Putative amino acid transporter, transmembrane domain-containing protein
MtrunA17_Chr2g0289341	Medtr2g025120	0.828786	0.0401158	2.65559	1.17759e-15	2.98389	1.68598e-19	1.42056	2.32218e-05	3	Putative aminocyclopropanecarboxylate oxidase
MtrunA17_Chr3g0121141	Medtr3g083370	0	#N/A	2.10572	1.41158e-16	2.24455	5.42549e-19	0	#N/A	3	Putative aminocyclopropanecarboxylate oxidase
MtrunA17_Chr5g0439011	Medtr5g085330	0.791909	0.0421623	2.29928	2.31328e-13	2.1233	5.31378e-12	0	#N/A	3	Putative aminocyclopropanecarboxylate oxidase	MtACC oxidase	1-aminocyclopropane-1-carboxylate (ACC) oxidase
MtrunA17_Chr6g0485341	Medtr6g086365	0	#N/A	2.67957	2.70927e-13	3.00918	1.54047e-17	1.13307	0.0027485	3	Putative arabinogalactan protein 16/20/22/41
MtrunA17_Chr4g0019141	Medtr4g037225	0	#N/A	0	#N/A	1.00059	1.93274e-05	1.25081	1.51575e-07	3	Putative autophagy protein Atg8 ubiquitin
MtrunA17_Chr4g0060091	Medtr4g107720	0	#N/A	0	#N/A	1.29592	2.49063e-13	1.03453	1.45088e-08	3	Putative Band 7 domain-containing protein
MtrunA17_Chr1g0190661	Medtr1g080810	0	#N/A	0	#N/A	0	#N/A	1.34646	0.0028973	3	Putative Barwin domain, RlpA-like domain superfamily protein
MtrunA17_Chr2g0295081	Medtr2g035170	0.699379	0.0255181	1.73099	1.57061e-11	1.75309	3.7182e-12	1.10878	2.61473e-05	3	Putative Bet v I/Major latex protein
MtrunA17_Chr2g0295111	Medtr2g035210	0.599117	0.0355978	1.89787	1.08791e-16	1.83578	4.25431e-16	1.49866	1.35961e-10	3	Putative Bet v I/Major latex protein
MtrunA17_Chr2g0295131	Medtr2g035220	0.581045	0.0136415	1.61729	8.16103e-17	1.54553	7.25966e-16	1.3942	1.70148e-12	3	Putative Bet v I/Major latex protein
MtrunA17_Chr4g0067841	Medtr4g120760	0	#N/A	1.35827	1.43441e-12	1.76068	9.62154e-21	0.731078	0.000290143	3	Putative Bet v I/Major latex protein
MtrunA17_Chr4g0033201	Medtr4g066240	0	#N/A	1.64164	0.000815293	2.25597	1.10985e-06	1.48049	0.00240187	3	Putative beta-glucosidase
MtrunA17_Chr4g0033401	Medtr4g067040	0	#N/A	3.15979	3.29237e-19	3.02749	1.84947e-18	0.808061	0.032542	3	Putative beta-glucosidase
MtrunA17_Chr4g0056401	Medtr4g101310	1.02051	0.00429985	0	#N/A	0	#N/A	0	#N/A	3	Putative bifunctional inhibitor/plant lipid transfer protein/seed storage helical	MtnsLTP83	non-specific Lipid Transfer Protein
MtrunA17_Chr7g0260071	Medtr7g095250	1.50314	0.00143312	0	#N/A	0	#N/A	0	#N/A	3	Putative bifunctional inhibitor/plant lipid transfer protein/seed storage helical	MtnsLTP126	non-specific Lipid Transfer Protein
MtrunA17_Chr2g0318871	Medtr2g081590	0	#N/A	0	#N/A	0	#N/A	1.59644	0.000193808	3	Putative BURP domain-containing protein
MtrunA17_Chr4g0034731	Medtr4g069570	0	#N/A	0	#N/A	0	#N/A	1.20553	0.00116721	3	Putative BURP domain-containing protein
MtrunA17_Chr8g0355831	Medtr8g045880	1.56528	5.56347e-12	1.50812	4.72364e-12	1.33882	4.6241e-10	0.870362	0.000122461	3	Putative BURP domain-containing protein
MtrunA17_Chr8g0355871	Medtr8g046000	0.760212	0.033195	0.707482	0.0329816	0	#N/A	1.29731	1.25821e-05	3	Putative BURP domain-containing protein
MtrunA17_Chr8g0355861	#N/A	0	#N/A	0	#N/A	0	#N/A	1.06029	0.00186126	3	Putative BURP domain-containing protein
MtrunA17_Chr5g0448091	Medtr5g098170	0.761968	2.74704e-06	1.39835	2.72622e-21	1.49214	1.58115e-24	1.23598	2.39653e-16	3	Putative caffeate O-methyltransferase
MtrunA17_Chr4g0053241	Medtr4g094898	0	#N/A	0	#N/A	1.06765	0.00702093	1.69861	1.39833e-05	3	Putative caffeoyl-CoA O-methyltransferase
MtrunA17_Chr1g0178531	Medtr1g059890	0.854011	0.00268372	1.92917	4.38447e-15	2.35226	5.03986e-22	1.30953	1.80484e-07	3	Putative calcium/calmodulin-dependent protein kinase
MtrunA17_Chr4g0049151	Medtr4g092515	0	#N/A	0	#N/A	0.964572	0.0301525	1.46197	0.000921359	3	Putative CAP superfamily protein	MtCAPE21	CAP-derived peptide
MtrunA17_Chr8g0366821	Medtr8g067275	0	#N/A	2.15099	7.84465e-09	2.42952	2.3379e-11	1.3297	0.000441937	3	Putative carboxy-lyase
MtrunA17_Chr8g0381001	Medtr8g089300	1.64349	0.00244314	0	#N/A	0	#N/A	0	#N/A	3	Putative casparian strip membrane protein
MtrunA17_Chr7g0253751	Medtr7g086240	0	#N/A	0	#N/A	1.2155	0.0144315	1.97953	6.96287e-05	3	Putative cathepsin propeptide inhibitor domain (I29), papain-like cysteine peptidase superfamily	MtCTLA9	Cytotoxic T-Lymphocyte Antigen 2 alpha
MtrunA17_Chr2g0281871	Medtr2g013110	0	#N/A	1.31238	7.27258e-06	2.11301	7.42806e-15	1.08452	0.000136474	3	Putative CBS domain-containing protein
MtrunA17_Chr3g0120661	Medtr3g082440	-0.630404	0.000302475	0.660038	3.81743e-05	0.627915	5.06949e-05	1.12842	2.00898e-13	3	Putative cellulase
MtrunA17_Chr3g0102551	Medtr3g060280	0.38906	0.0148553	1.24071	1.10957e-21	1.53287	1.26154e-32	0.927488	3.33478e-12	3	Putative cellulose synthase (UDP-forming)
MtrunA17_Chr1g0213011	Medtr1g115820	0.564347	0.00857479	1.64198	3.45083e-20	1.62718	2.52235e-20	0.848658	4.39636e-06	3	Putative chalcone isomerase	MtCHI-2	chalcone isomerase
MtrunA17_Chr3g0121531	Medtr3g083910	1.07635	0.0315421	1.80317	2.31365e-05	1.93651	2.3835e-06	0	#N/A	3	Putative chalcone synthase	MtCHS-1B	Chalcone synthase 1B
MtrunA17_Chr5g0395521	Medtr5g007717	1.16906	0.000969408	2.36181	6.81896e-14	2.48881	1.25762e-15	0.767507	0.0255818	3	Putative chalcone synthase
MtrunA17_Chr5g0395561	Medtr5g007730	1.31827	0.000802496	2.21704	3.24993e-10	2.60457	6.92156e-14	0.859928	0.0240382	3	Putative chalcone synthase	MtCHS-4	Chalcone synthase 4
MtrunA17_Chr3g0145981	Medtr3g118390	0	#N/A	1.81298	1.51611e-17	2.04985	2.39771e-22	1.17962	5.42962e-08	3	Putative chitinase	MtPR3	pathogenesis related protein 3 (defense response-activated chitinase)
MtrunA17_Chr8g0370831	Medtr8g074335	0	#N/A	2.64987	2.0988e-12	3.03577	4.89251e-16	1.56355	3.77537e-05	3	Putative chitinase
MtrunA17_Chr8g0350551	#N/A	-1.3118	0.00285258	0	#N/A	1.08112	0.00549273	1.37146	0.000809337	3	Putative chitinase
MtrunA17_Chr8g0350531	#N/A	0	#N/A	-0.752226	0.0182873	0	#N/A	1.62024	8.39657e-08	3	Putative chitinase
MtrunA17_Chr8g0350541	#N/A	0	#N/A	-1.0016	0.00844819	0	#N/A	1.57757	9.18533e-06	3	Putative chitinase
MtrunA17_Chr7g0274181	Medtr7g115220	0	#N/A	2.1737	2.91506e-29	2.20187	2.69201e-30	0.988701	5.63829e-07	3	Putative chitin-binding, type 1, Barwin domain, Endochitinase-like superfamily	MtPR-4	pathogenesis related protein 4 (hevein-like)
MtrunA17_Chr7g0275601	Medtr7g117350	0	#N/A	0.480446	0.000711937	0.5751	6.44163e-06	1.11603	2.52482e-19	3	Putative chromatin regulator PHD family
MtrunA17_Chr6g0450211	Medtr6g406250	0	#N/A	2.15841	1.29409e-19	2.36354	1.23731e-23	0.596919	0.0229973	3	Putative cinnamoyl-CoA reductase
MtrunA17_Chr8g0375701	#N/A	0	#N/A	2.05113	1.64823e-18	2.24817	3.31647e-22	1.33774	2.03067e-08	3	Putative codeine 3-O-demethylase
MtrunA17_Chr3g0129541	Medtr3g095340	1.28126	0.00158536	1.08003	0.00647837	2.21109	1.04309e-09	-1.16721	0.00466895	3	Putative concanavalin A-like lectin/glucanase domain superfamily, alginate lyase 2
MtrunA17_Chr4g0075941	Medtr4g133440	0	#N/A	1.57414	8.98068e-11	2.15865	4.03858e-20	1.16446	1.9616e-06	3	Putative CRAL/TRIO domain superfamily, CRAL-TRIO lipid binding domain superfamily
MtrunA17_Chr4g0076441	Medtr4g134120	0	#N/A	1.60816	1.10969e-18	2.11458	2.40202e-31	1.09963	3.31747e-09	3	Putative CRAL-TRIO lipid binding domain, CRAL/TRIO domain superfamily
MtrunA17_Chr7g0250461	Medtr7g481600	0	#N/A	0.541086	0.00963608	0.706412	0.000198821	1.00226	1.10086e-07	3	Putative cucumisin
MtrunA17_Chr3g0118711	#N/A	0.781209	0.00137425	1.87723	2.46052e-18	2.03761	5.49156e-22	0.886291	6.56513e-05	3	Putative cyanohydrin beta-glucosyltransferase
MtrunA17_Chr5g0441261	Medtr5g088770	0.890376	6.38845e-09	1.37411	7.60186e-22	2.02246	3.09366e-45	1.05594	5.00336e-13	3	Putative Cystatin domain-containing protein	MtPhyCys32	Phytocystatin
MtrunA17_Chr6g0452941	Medtr6g011530	0	#N/A	1.67267	1.71244e-07	1.53252	8.55195e-07	1.76541	2.42268e-08	3	Putative cysteamine dioxygenase
MtrunA17_Chr6g0460971	Medtr6g027730	2.63718	0.000843671	0	#N/A	1.5415	0.0309432	2.91799	4.87664e-05	3	Putative cysteamine dioxygenase
MtrunA17_Chr7g0253891	Medtr7g086380	0	#N/A	1.57754	0.016832	1.6664	0.00648522	3.0568	8.2671e-07	3	Putative cysteamine dioxygenase
MtrunA17_Chr4g0048281	Medtr4g091090	0	#N/A	0	#N/A	2.13644	1.60138e-06	1.32131	0.00548119	3	Putative cysteine-rich transmembrane CYSTM domain-containing protein
MtrunA17_Chr4g0020041	Medtr0059s0170	0	#N/A	0	#N/A	0	#N/A	1.08537	0.00782039	3	Putative cytochrome P450
MtrunA17_Chr2g0304871	Medtr2g450040	0	#N/A	1.63519	5.43564e-18	1.87482	1.33738e-23	1.18176	8.6815e-10	3	Putative cytochrome P450
MtrunA17_Chr3g0101621	Medtr3g057970	0	#N/A	3.07336	1.6469e-18	1.93275	1.29015e-08	0	#N/A	3	Putative cytochrome P450
MtrunA17_Chr5g0405001	Medtr5g021390	0	#N/A	1.4212	1.20353e-05	2.07309	2.54044e-11	1.63582	3.24953e-07	3	Putative cytochrome P450
MtrunA17_Chr5g0431501	Medtr5g072980	0	#N/A	1.33756	2.34159e-05	1.64485	5.25226e-08	0.687826	0.0428982	3	Putative cytochrome P450
MtrunA17_Chr6g0451751	Medtr6g008620	0	#N/A	1.60273	5.81352e-24	1.9356	9.02212e-35	1.10594	4.49627e-12	3	Putative cytochrome P450
MtrunA17_Chr8g0390881	#N/A	0.932765	3.65645e-05	2.61143	1.25597e-38	2.68373	3.66979e-41	1.88315	8.94853e-21	3	Putative cytochrome P450
MtrunA17_Chr1g0187811	Medtr1g093140	1.38166	9.69519e-14	2.32721	4.89339e-40	2.06126	1.06382e-33	1.50293	3.25585e-18	3	Putative deacetoxyvindoline 4-hydroxylase
MtrunA17_Chr8g0348081	Medtr8g028435	0	#N/A	1.68105	1.42185e-14	1.67671	5.07616e-15	1.01269	6.01649e-06	3	Putative deacetoxyvindoline 4-hydroxylase
MtrunA17_Chr1g0152831	Medtr1g018610	0	#N/A	2.75004	7.09926e-11	1.77433	1.68679e-05	1.52116	0.000337431	3	Putative delta(4)-3-oxosteroid 5-beta-reductase
MtrunA17_Chr1g0169511	Medtr1g046800	0	#N/A	0	#N/A	0	#N/A	1.03547	0.0030481	3	Putative dirigent protein
MtrunA17_Chr4g0005111	Medtr4g013385	0	#N/A	3.37759	8.67752e-34	2.91386	1.01546e-26	1.34363	9.8453e-07	3	Putative dirigent protein
MtrunA17_Chr4g0005131	Medtr4g013770	0.428918	0.0176623	1.82382	1.36494e-35	1.77398	3.3919e-34	0.854302	1.30992e-08	3	Putative dirigent protein
MtrunA17_Chr7g0259091	Medtr7g093820	0	#N/A	2.80042	3.42279e-09	2.85032	7.91339e-10	1.19056	0.0164168	3	Putative dirigent protein
MtrunA17_Chr7g0259101	#N/A	0	#N/A	1.96682	4.82669e-08	2.23976	1.87711e-10	1.05419	0.00518596	3	Putative dirigent protein
MtrunA17_Chr1g0192551	#N/A	0	#N/A	0	#N/A	0.47245	0.00126697	1.06584	5.0915e-14	3	Putative DNA helicase
MtrunA17_Chr1g0181591	Medtr1g066810	0	#N/A	0	#N/A	0	#N/A	1.46349	0.006782	3	Putative DnaJ domain, Chaperone J-domain superfamily
MtrunA17_Chr1g0157231	Medtr1g026160	0	#N/A	0	#N/A	0	#N/A	1.07229	0.00123928	3	Putative dual-specificity kinase TKL-Pl-4 family
MtrunA17_Chr1g0157221	#N/A	0	#N/A	0	#N/A	0	#N/A	1.11659	0.001805	3	Putative dual-specificity kinase TKL-Pl-4 family
MtrunA17_Chr3g0140601	Medtr3g110390	0	#N/A	0	#N/A	0	#N/A	1.21501	1.33274e-05	3	Putative early nodulin 93 ENOD93 protein
MtrunA17_Chr4g0063331	Medtr4g113820	0	#N/A	0	#N/A	0	#N/A	2.14137	0.00251131	3	Putative early nodulin 93 ENOD93 protein	MtENOD93	early nodulin 93
MtrunA17_Chr4g0057641	Medtr4g103630	0	#N/A	0	#N/A	3.71022	5.40084e-13	0	#N/A	3	Putative EF-hand domain pair protein CML	MtCML21	Calmodulin-like 21
MtrunA17_Chr8g0392951	Medtr8g107110	0	#N/A	0	#N/A	3.13578	1.40741e-13	0	#N/A	3	Putative EF-hand domain pair protein CML	MtCML50	Calmodulin-like 50
MtrunA17_Chr7g0225921	#N/A	0	#N/A	2.3471	1.5381e-06	2.55654	5.83454e-08	1.36026	0.00618109	3	Putative EF-hand domain pair protein CML
MtrunA17_Chr3g0125311	#N/A	0.654786	0.000341828	0	#N/A	1.14395	2.09459e-13	0.828696	2.41763e-07	3	Putative EF-hand domain pair protein CML
MtrunA17_Chr1g0185001	Medtr1g071150	0	#N/A	2.06615	1.13009e-07	1.99618	9.00892e-08	0.87742	0.0351445	3	Putative EF-hand domain pair, mitochondrial Rho GTPase
MtrunA17_Chr3g0141331	Medtr3g111610	0	#N/A	2.09562	1.56003e-11	1.98383	7.68316e-11	0.808495	0.0160015	3	Putative ELO family protein
MtrunA17_Chr7g0230891	#N/A	0	#N/A	0	#N/A	1.20269	0.00199967	1.38986	0.00045756	3	Putative endo-polygalacturonase
MtrunA17_Chr7g0223101	Medtr7g024280	0	#N/A	2.79082	8.60211e-16	3.15005	5.85232e-20	1.53216	8.85054e-06	3	Putative enoyl-CoA hydratase/isomerase, ClpP/crotonase-like domain superfamily
MtrunA17_Chr7g0223121	Medtr7g024300	0	#N/A	1.49188	4.149e-10	1.91357	2.14187e-16	0.816691	0.00108384	3	Putative enoyl-CoA hydratase/isomerase, ClpP/crotonase-like domain superfamily
MtrunA17_Chr5g0414891	Medtr5g036410	0.886853	0.0203227	2.79318	6.12363e-19	2.81827	1.04288e-19	1.20562	0.00017371	3	Putative envelysin
MtrunA17_Chr1g0182041	Medtr1g067480	0	#N/A	2.39426	7.50538e-10	2.41404	2.4983e-10	-1.06362	0.0090078	3	Putative exocyst complex component Exo70, cullin repeat-like-containing domain superfamily
MtrunA17_Chr5g0431821	Medtr5g073650	0	#N/A	1.52345	2.10814e-12	1.63051	4.34417e-15	1.13501	9.67223e-08	3	Putative exocyst complex component Exo70, cullin repeat-like-containing domain superfamily
MtrunA17_Chr3g0128801	Medtr3g094060	1.02411	0.00172415	0.870784	0.00492797	0	#N/A	0	#N/A	3	Putative expansin/Lol pI, expansin, cellulose-binding-like domain superfamily
MtrunA17_Chr7g0271001	#N/A	0	#N/A	0	#N/A	0	#N/A	1.20593	0.00827815	3	Putative expansin/Lol pI, expansin, cellulose-binding-like domain superfamily
MtrunA17_Chr5g0399671	Medtr5g013260	0	#N/A	2.4822	3.98053e-18	2.33234	1.21378e-16	0.687803	0.0285595	3	Putative FAD-binding domain, FAD/NAD(P)-binding domain superfamily
MtrunA17_Chr4g0026611	Medtr4g053380	0	#N/A	0	#N/A	0	#N/A	1.11505	4.47799e-06	3	Putative FAS1 domain-containing protein
MtrunA17_Chr4g0029501	Medtr4g059840	0	#N/A	0	#N/A	0	#N/A	1.14944	2.498e-06	3	Putative FAS1 domain-containing protein
MtrunA17_Chr8g0379631	Medtr8g087470	0	#N/A	0	#N/A	0	#N/A	1.20683	1.40978e-07	3	Putative FAS1 domain-containing protein
MtrunA17_Chr3g0089071	Medtr3g030620	0	#N/A	0	#N/A	0.686417	0.0353845	1.48634	3.91085e-07	3	Putative F-box associated interaction domain, F-box-like domain superfamily
MtrunA17_Chr8g0350971	Medtr8g033090	0	#N/A	0	#N/A	2.80043	1.08426e-09	2.78075	8.60084e-10	3	Putative F-box associated interaction domain, F-box-like domain superfamily
MtrunA17_Chr4g0061251	Medtr4g109280	0	#N/A	1.32294	1.92915e-12	1.78646	1.05239e-22	0.683642	0.000534576	3	Putative F-box domain, galactose oxidase/kelch, beta-propeller, F-box associated interaction
MtrunA17_Chr1g0159531	Medtr1g029500	1.07299	0.00753907	0	#N/A	0	#N/A	0	#N/A	3	Putative F-box domain, leucine-rich repeat domain superfamily, F-box-like domain superfamily
MtrunA17_Chr1g0212661	Medtr1g115400	0	#N/A	1.8448	2.05372e-11	2.78505	3.53679e-24	1.20355	1.3634e-05	3	Putative F-box domain-containing protein
MtrunA17_Chr4g0026081	Medtr4g052460	0	#N/A	1.59715	1.38323e-09	2.52208	5.05152e-22	1.20435	8.98383e-06	3	Putative F-box domain-containing protein
MtrunA17_Chr4g0049071	Medtr4g092360	0	#N/A	1.78572	2.21637e-08	2.05968	5.35271e-12	1.1936	0.000140838	3	Putative F-box domain-containing protein
MtrunA17_Chr1g0179801	Medtr1g062110	0	#N/A	1.41745	0.000175132	2.23682	3.15296e-10	2.08382	9.68172e-09	3	Putative flavanone 3-dioxygenase
MtrunA17_Chr4g0045431	Medtr4g087100	0	#N/A	1.6185	6.55327e-12	2.02329	1.93282e-18	0.976027	6.21389e-05	3	Putative flavanone 3-dioxygenase	MtGAOL5	GA2-oxidase like 5
MtrunA17_Chr7g0265221	Medtr7g102820	0	#N/A	1.82741	7.44888e-07	2.65983	2.99021e-14	1.80805	2.60475e-07	3	Putative flavanone 3-dioxygenase
MtrunA17_Chr8g0345831	Medtr8g024120	1.0656	0.04409	1.12614	0.0216827	2.65131	6.73022e-09	1.15581	0.0147594	3	Putative flavanone 3-dioxygenase
MtrunA17_Chr3g0094231	Medtr3g436390	1.12661	0.00207644	2.40742	2.07302e-14	1.99898	7.88977e-11	0.680422	0.0493997	3	Putative flavonoid 3',5'-hydroxylase	MtF3'5'H-1	Flavonoid 3',5'-hydroxylase
MtrunA17_Chr5g0424211	Medtr5g059140	0	#N/A	1.9083	4.99592e-12	2.1118	7.26971e-15	1.50054	7.18853e-08	3	Putative flavonol synthase
MtrunA17_Chr5g0410081	Medtr5g027970	0	#N/A	1.78948	1.42011e-27	1.765	2.21027e-27	1.15571	4.67113e-12	3	Putative G protein alpha subunit, helical insertion
MtrunA17_Chr1g0198351	Medtr1g092690	1.2521	0.00798945	0	#N/A	0	#N/A	0	#N/A	3	Putative GDSL lipase/esterase, SGNH hydrolase superfamily
MtrunA17_Chr8g0344931	Medtr8g022790	0	#N/A	1.22888	5.96676e-05	3.43532	2.75312e-30	2.4774	2.90573e-17	3	Putative GDSL lipase/esterase, SGNH hydrolase superfamily
MtrunA17_Chr6g0481891	Medtr6g077990	0	#N/A	2.62021	1.27514e-10	3.2514	1.24488e-15	1.4881	0.000354847	3	Putative GEM-like protein
MtrunA17_Chr1g0205371	Medtr1g103680	0	#N/A	2.10601	2.26068e-11	2.90313	3.5894e-21	1.10153	0.000573478	3	Putative geraniol 8-hydroxylase
MtrunA17_Chr5g0395321	Medtr5g007450	0	#N/A	2.90397	3.16612e-21	2.43189	4.768e-16	1.87079	9.5561e-10	3	Putative geraniol 8-hydroxylase
MtrunA17_Chr8g0355961	Medtr8g046210	0	#N/A	3.29088	3.79912e-20	2.96889	2.10774e-17	1.99207	1.67748e-08	3	Putative geraniol 8-hydroxylase
MtrunA17_Chr5g0444251	Medtr5g092910	0.720507	0.0413854	2.07492	4.70488e-13	2.11766	5.13149e-14	0	#N/A	3	Putative geranylgeranyl diphosphate synthase
MtrunA17_Chr1g0189841	Medtr1g079490	1.31954	4.73076e-06	2.07443	4.84557e-15	2.2316	1.52834e-17	0	#N/A	3	Putative germin, rmlC-like cupin domain superfamily, rmlC-like jelly roll
MtrunA17_Chr2g0302171	Medtr2g045100	0	#N/A	2.84523	3.98254e-16	2.56169	1.22037e-13	1.1128	0.00356973	3	Putative germin, rmlC-like cupin domain superfamily, rmlC-like jelly roll
MtrunA17_Chr1g0156621	Medtr1g025250	0	#N/A	0	#N/A	0	#N/A	1.17498	5.11258e-05	3	Putative gibberellin regulated protein	MtGASA3	Gibberellic Acid-Stimulated in Arabidopsis
MtrunA17_Chr1g0207611	Medtr1g106915	0	#N/A	0	#N/A	0	#N/A	1.3094	0.00373958	3	Putative gibberellin regulated protein	MtGASA5	Gibberellic Acid-Stimulated in Arabidopsis
MtrunA17_Chr6g0451481	Medtr6g007897	1.07327	0.000107208	0	#N/A	0	#N/A	0	#N/A	3	Putative gibberellin regulated protein	MtGASA17	Gibberellic Acid-Stimulated in Arabidopsis
MtrunA17_Chr3g0079441	Medtr3g009010	1.65205	0.00501561	2.1625	5.41692e-05	2.1215	3.21661e-05	2.02277	9.84903e-05	3	Putative glucan 1,3-beta-glucosidase
MtrunA17_Chr5g0425361	Medtr5g062190	0.937322	0.0156325	2.80942	2.52891e-18	2.46031	5.70048e-15	0	#N/A	3	Putative glucan 1,3-beta-glucosidase
MtrunA17_Chr6g0461211	Medtr6g028100	0	#N/A	1.29491	1.03755e-06	1.88424	1.44112e-13	0.915149	0.000751998	3	Putative glucan 1,3-beta-glucosidase
MtrunA17_Chr2g0294591	Medtr2g034470	0.818148	0.00816283	2.35383	3.69077e-19	2.84871	4.56235e-27	1.30371	1.05452e-06	3	Putative glucan endo-1,3-beta-D-glucosidase	MtBG16	beta-1,3-Glucanase 16
MtrunA17_Chr2g0294601	Medtr2g034480	0.779587	0.000171898	1.95902	2.66213e-26	2.14716	1.55753e-31	1.25252	2.13041e-11	3	Putative glucan endo-1,3-beta-D-glucosidase	MtBG15	beta-1,3-Glucanase 15
MtrunA17_Chr4g0038961	Medtr4g076430	0.583009	0.0419176	1.52416	3.31297e-11	1.32121	5.73538e-09	1.29601	2.6417e-08	3	Putative glucan endo-1,3-beta-D-glucosidase	MtBG20;MtBGLU1	beta-1,3-Glucanase 20;beta-1,3-glucanase 1
MtrunA17_Chr4g0043851	Medtr4g084480	0.787799	0.0169606	1.77006	1.08298e-10	2.81317	8.07116e-25	0.790943	0.00729155	3	Putative glucan endo-1,3-beta-D-glucosidase
MtrunA17_Chr1g0196771	Medtr1g090150	1.39105	0.00191537	1.99507	3.73862e-07	2.02022	1.10131e-07	0	#N/A	3	Putative glutathione transferase
MtrunA17_Chr1g0212301	Medtr1g115195	0	#N/A	0	#N/A	0.870723	0.0185033	1.09533	0.00344284	3	Putative glutathione transferase
MtrunA17_Chr3g0107731	Medtr3g467420	0	#N/A	0	#N/A	0.54868	0.0233423	1.48341	1.08501e-10	3	Putative glutathione transferase
MtrunA17_Chr8g0379581	Medtr8g087425	0	#N/A	1.55928	9.19202e-12	1.74673	8.22935e-15	1.26137	6.15221e-08	3	Putative glutathione transferase
MtrunA17_Chr1g0157781	Medtr1g026940	0	#N/A	1.52959	1.4813e-07	1.61291	6.47423e-09	1.1964	3.39396e-05	3	Putative glycerophosphodiester phosphodiesterase, protein kinase RLK-Pelle-LRK10L-2 family
MtrunA17_Chr1g0157861	Medtr1g027030	0	#N/A	2.20528	6.81927e-18	2.67376	4.48264e-26	1.61615	2.35249e-10	3	Putative glycerophosphodiester phosphodiesterase, protein kinase RLK-Pelle-LRK10L-2 family
MtrunA17_Chr1g0157871	Medtr1g027040	0	#N/A	1.39852	1.58967e-12	1.71545	6.6694e-19	0.875053	1.64483e-05	3	Putative glycerophosphodiester phosphodiesterase, protein kinase RLK-Pelle-LRK10L-2 family
MtrunA17_Chr1g0157881	Medtr1g027050	0	#N/A	2.64933	1.24592e-15	2.94441	1.59231e-19	1.86629	1.2209e-08	3	Putative glycerophosphodiester phosphodiesterase, protein kinase RLK-Pelle-LRK10L-2 family
MtrunA17_Chr1g0157901	Medtr1g027060	0	#N/A	1.15849	5.47218e-08	1.71003	1.93154e-17	0.880465	3.13501e-05	3	Putative glycerophosphodiester phosphodiesterase, protein kinase RLK-Pelle-LRK10L-2 family
MtrunA17_Chr1g0157911	Medtr1g027070	0	#N/A	1.3947	1.73703e-20	1.78629	3.14463e-33	0.86249	2.00747e-08	3	Putative glycerophosphodiester phosphodiesterase, protein kinase RLK-Pelle-LRK10L-2 family
MtrunA17_Chr1g0158531	Medtr1g027970	1.08047	0.0253199	2.64651	6.29067e-12	2.89275	1.69598e-14	0	#N/A	3	Putative glycerophosphodiester phosphodiesterase, protein kinase RLK-Pelle-LRK10L-2 family
MtrunA17_Chr1g0158541	Medtr1g027990	0	#N/A	1.44561	2.77234e-07	2.31003	1.5083e-17	0.651865	0.035137	3	Putative glycerophosphodiester phosphodiesterase, protein kinase RLK-Pelle-LRK10L-2 family
MtrunA17_Chr1g0158761	Medtr1g028280	-1.34253	0.000126718	0	#N/A	0	#N/A	1.57721	3.79158e-08	3	Putative glycerophosphodiester phosphodiesterase, protein kinase RLK-Pelle-LRK10L-2 family
MtrunA17_Chr7g0251071	Medtr7g082470	0	#N/A	2.07886	2.95951e-14	2.40302	1.65476e-19	0.986263	0.000490489	3	Putative glycerophosphodiester phosphodiesterase, protein kinase RLK-Pelle-LRK10L-2 family
MtrunA17_Chr7g0251101	Medtr7g082510	0	#N/A	2.40376	2.387e-13	2.7223	1.41261e-17	0.989942	0.00327679	3	Putative glycerophosphodiester phosphodiesterase, protein kinase RLK-Pelle-LRK10L-2 family
MtrunA17_Chr6g0467711	#N/A	0	#N/A	1.6658	9.31398e-08	1.85076	9.79105e-10	1.66536	1.06016e-07	3	Putative glycerophosphodiester phosphodiesterase, protein kinase RLK-Pelle-LRK10L-2 family
MtrunA17_Chr3g0140491	Medtr3g110320	0	#N/A	1.68978	2.70927e-13	2.0648	1.11844e-19	0.556099	0.0312388	3	Putative glycoside hydrolase family 18, catalytic domain, glycoside hydrolase superfamily
MtrunA17_Chr1g0209531	Medtr1g110290	0	#N/A	1.35108	0.00272839	3.31516	2.45763e-15	1.14066	0.0110267	3	Putative glycosyl transferase, family 14
MtrunA17_Chr1g0154361	Medtr1g021638	0	#N/A	2.7704	1.01054e-13	3.10612	3.7961e-17	1.31661	0.000591339	3	Putative Gnk2-like domain-containing protein
MtrunA17_Chr2g0280381	Medtr2g010720	0	#N/A	0.87968	2.80854e-06	1.75992	5.2782e-23	1.0348	1.97465e-08	3	Putative Gnk2-like domain-containing protein
MtrunA17_Chr2g0323011	Medtr2g088980	0.700855	0.00147206	2.18785	2.92272e-31	1.48033	9.02129e-16	0	#N/A	3	Putative Gnk2-like domain-containing protein
MtrunA17_Chr2g0296931	Medtr2g035440	0	#N/A	0	#N/A	0	#N/A	1.23649	2.97974e-08	3	Putative HAD hydrolase, subfamily IA, HAD superfamily
MtrunA17_Chr4g0070891	#N/A	0	#N/A	0	#N/A	3.2147	1.01635e-11	0	#N/A	3	Putative harbinger transposase-derived nuclease domain-containing protein
MtrunA17_Chr6g0462771	Medtr6g033955	2.12664	0.000168283	1.18705	0.0113583	0	#N/A	0	#N/A	3	Putative Heat shock protein 70 family
MtrunA17_Chr5g0445581	Medtr5g094730	1.35816	0.00854483	0	#N/A	0	#N/A	0	#N/A	3	Putative heavy metal-associated domain superfamily
MtrunA17_Chr4g0030661	Medtr4g062450	0	#N/A	0	#N/A	0	#N/A	1.08641	1.87645e-05	3	Putative heavy metal-associated domain, HMA, heavy metal-associated domain superfamily
MtrunA17_Chr8g0337951	Medtr8g010540	1.57151	0.00512144	0	#N/A	0	#N/A	0	#N/A	3	Putative heavy metal-associated domain, HMA, heavy metal-associated domain superfamily
MtrunA17_Chr1g0202041	Medtr1g099020	0	#N/A	1.26158	0.00293889	2.8704	4.77141e-13	4.06676	8.94853e-21	3	Putative histidine decarboxylase
MtrunA17_Chr8g0391621	Medtr8g105140	0	#N/A	0	#N/A	3.64862	2.83293e-17	0	#N/A	3	Putative hydrolase
MtrunA17_Chr8g0336651	Medtr8g008970	1.30798	0.00244967	2.02485	2.95649e-08	1.83605	1.33422e-07	1.88928	7.75333e-08	3	Putative hydroquinone glucosyltransferase
MtrunA17_Chr4g0005151	Medtr4g013730	0.687631	0.000694228	1.38741	5.35061e-15	1.62547	7.25442e-21	0.7777	2.79607e-05	3	Putative intramolecular oxidoreductase
MtrunA17_Chr4g0053621	Medtr4g095050	1.25243	0.0024645	2.27284	4.15371e-10	2.95245	2.8837e-16	0	#N/A	3	Putative isoflavone 2'-hydroxylase
MtrunA17_Chr5g0401691	Medtr5g016440	0	#N/A	1.85917	3.51554e-11	1.74625	2.56246e-10	0.814929	0.0070459	3	Putative isoflavone 2'-hydroxylase
MtrunA17_Chr6g0462571	Medtr6g033725	1.37024	1.90493e-07	0	#N/A	0	#N/A	0	#N/A	3	Putative isoflavone 7-O-glucosyltransferase
MtrunA17_Chr7g0219241	Medtr7g014160	0	#N/A	2.18858	1.01647e-10	2.41147	4.08309e-13	1.55957	4.86041e-06	3	Putative isoflavone-7-O-beta-glucoside 6''-O-malonyltransferase	MtMAT3	isoflavonoid malonyl transferase 3
MtrunA17_Chr8g0386331	Medtr8g096880	0.723154	0.00858972	0	#N/A	1.18818	2.60381e-07	0.524753	0.0444394	3	Putative isomerase
MtrunA17_Chr7g0230061	Medtr0018s0170	0	#N/A	0	#N/A	0	#N/A	2.30976	1.12516e-05	3	Putative kelch-type beta propeller
MtrunA17_Chr2g0311721	Medtr2g069030	0	#N/A	0	#N/A	0	#N/A	1.02725	5.01553e-09	3	Putative kelch-type beta propeller	MtKELCH	Kelch repeat protein
MtrunA17_Chr8g0337781	Medtr8g010320	1.73145	0.00283135	3.0302	1.2843e-09	3.69598	1.07496e-13	0	#N/A	3	Putative knottin, scorpion toxin-like superfamily	MtPDF46	Plant Defensin
MtrunA17_Chr4g0008521	Medtr4g019225	1.82708	0.0104807	3.12729	4.94546e-07	2.73759	5.13153e-06	0	#N/A	3	Putative laccase
MtrunA17_Chr5g0429511	Medtr5g069680	0	#N/A	0	#N/A	0	#N/A	1.11922	3.64098e-05	3	Putative laccase
MtrunA17_Chr5g0433201	Medtr5g076170	0	#N/A	1.7761	1.26461e-06	2.33666	4.9444e-11	1.44826	8.9929e-05	3	Putative Late embryogenesis abundant protein, LEA_2 subgroup	MtNDR1	Non-race specific disease resistance protein 1. Required for resistance conferred by multiple R genes
MtrunA17_Chr7g0267181	Medtr7g105870	0	#N/A	1.01391	3.40526e-06	1.75573	2.80203e-17	0.723522	0.00126266	3	Putative Late embryogenesis abundant protein, LEA_2 subgroup
MtrunA17_Chr7g0267281	Medtr7g106000	0	#N/A	1.06863	0.000121188	1.89569	3.42628e-13	0.959967	0.000532698	3	Putative Late embryogenesis abundant protein, LEA_2 subgroup
MtrunA17_Chr5g0435341	Medtr5g080000	0	#N/A	2.41731	5.87199e-16	3.03106	3.05219e-25	1.41486	2.03446e-06	3	Putative leucine-rich repeat domain superfamily
MtrunA17_Chr8g0350081	Medtr8g433010	0	#N/A	1.04645	0.0440777	1.82035	2.76955e-05	1.38705	0.00196111	3	Putative leucine-rich repeat domain superfamily
MtrunA17_Chr5g0415831	#N/A	0	#N/A	0.810226	0.0456456	2.45173	4.32766e-13	0.970769	0.00867343	3	Putative leucine-rich repeat domain superfamily
MtrunA17_Chr3g0079471	Medtr3g009050	1.00184	0.0090107	2.41404	1.96623e-13	3.15221	1.10296e-21	1.09063	0.00139358	3	Putative leucine-rich repeat-containing, plant-type, leucine-rich repeat domain superfamily
MtrunA17_Chr4g0051281	Medtr4g094440	0	#N/A	0	#N/A	0	#N/A	1.83401	2.49394e-08	3	Putative leucine-rich repeat-containing, plant-type, leucine-rich repeat domain superfamily
MtrunA17_Chr5g0435331	Medtr5g079980	0	#N/A	1.93114	7.96171e-12	2.44975	1.72896e-19	1.02859	0.00034057	3	Putative leucine-rich repeat-containing, plant-type, leucine-rich repeat domain superfamily
MtrunA17_Chr5g0446021	Medtr5g095120	0	#N/A	2.90255	2.99345e-20	3.41025	3.6152e-27	1.72048	3.87928e-08	3	Putative leucine-rich repeat-containing, plant-type, leucine-rich repeat domain superfamily
MtrunA17_Chr7g0222881	Medtr7g023670	0	#N/A	2.91515	4.62535e-20	3.01431	1.11547e-21	2.01412	2.33808e-10	3	Putative leucine-rich repeat-containing, plant-type, leucine-rich repeat domain superfamily
MtrunA17_Chr7g0222901	Medtr7g023690	0	#N/A	1.70298	5.041e-07	2.50854	3.33522e-14	0	#N/A	3	Putative leucine-rich repeat-containing, plant-type, leucine-rich repeat domain superfamily
MtrunA17_Chr7g0222911	Medtr7g023730	1.49366	0.00649614	3.37171	4.16143e-12	3.64959	4.02931e-14	0	#N/A	3	Putative leucine-rich repeat-containing, plant-type, leucine-rich repeat domain superfamily
MtrunA17_Chr7g0222921	Medtr7g023740	0	#N/A	2.00492	1.72947e-11	2.39062	4.71737e-16	0.680646	0.0406201	3	Putative leucine-rich repeat-containing, plant-type, leucine-rich repeat domain superfamily
MtrunA17_Chr7g0241481	#N/A	0.95519	0.0291608	0.976494	0.0128795	1.95074	1.17421e-08	0.90398	0.0187742	3	Putative leucine-rich repeat-containing, plant-type, leucine-rich repeat domain superfamily
MtrunA17_Chr3g0118651	Medtr3g479460	0	#N/A	0	#N/A	0	#N/A	1.38	3.34682e-06	3	Putative linoleate 13S-lipoxygenase
MtrunA17_Chr5g0406871	Medtr5g024020	0.859452	4.96847e-05	1.1075	1.09566e-08	1.85709	5.98423e-23	1.18731	9.26353e-10	3	Putative linoleate 9S-lipoxygenase
MtrunA17_Chr7g0272791	Medtr7g113410	1.35946	0.00650012	2.89604	3.91706e-11	3.18899	1.66509e-13	0	#N/A	3	Putative linoleate 9S-lipoxygenase
MtrunA17_Chr4g0034581	Medtr4g069220	1.38575	0.00331387	0	#N/A	0	#N/A	0	#N/A	3	Putative lipid-transfer protein DIR1	MtnsLTP52	non-specific Lipid Transfer Protein
MtrunA17_Chr5g0399111	Medtr5g012390	0	#N/A	1.98633	0.000106876	2.22481	6.94124e-06	2.93249	1.0207e-08	3	Putative L-lactate dehydrogenase
MtrunA17_Chr3g0082691	#N/A	0.935584	0.0419248	0.990183	0.00446135	0	#N/A	1.27252	8.53633e-05	3	Putative lyase
MtrunA17_Chr1g0178891	Medtr1g060430	1.03835	0.00536435	0	#N/A	0	#N/A	0.806968	0.0269333	3	Putative LysM domain-containing protein
MtrunA17_Chr7g0266071	Medtr7g104250	0.721031	0.0136002	1.74446	6.22492e-13	2.125	7.81989e-19	1.41921	1.42469e-08	3	Putative LysM domain-containing protein	MtLYE1	0
MtrunA17_Chr1g0198441	Medtr1g092870	0	#N/A	0	#N/A	0	#N/A	1.77453	0.00782039	3	Putative major facilitator superfamily, MFS transporter superfamily
MtrunA17_Chr1g0198451	Medtr1g092880	0	#N/A	0	#N/A	0.894111	0.00639592	1.91666	1.77353e-09	3	Putative major facilitator superfamily, MFS transporter superfamily
MtrunA17_Chr3g0115741	Medtr3g074380	1.05791	0.000541578	1.70912	1.2828e-10	2.24733	7.78903e-18	0.991256	0.000307784	3	Putative major facilitator, sugar transporter, major facilitator superfamily
MtrunA17_Chr5g0394341	Medtr5g006070	0	#N/A	1.59932	1.64691e-06	2.15993	2.13685e-11	1.32444	8.39919e-05	3	Putative major facilitator, sugar transporter, major facilitator superfamily	MtSTP13_3	sugar transport protein 13 (Hexose transporter)
MtrunA17_Chr7g0257631	Medtr7g091690	0	#N/A	0.421729	0.00090009	0.637484	3.00937e-08	1.05614	3.20992e-20	3	Putative major facilitator, sugar transporter, major facilitator superfamily	MtSTP7_2	Sugar transport protein 7 (Hexose transporter)
MtrunA17_Chr3g0140501	Medtr3g110330	0	#N/A	2.07027	7.55987e-13	2.34614	1.66677e-16	0.93806	0.00201935	3	Putative malate dehydrogenase (oxaloacetate-decarboxylating) (NADP(+))
MtrunA17_Chr8g0347861	Medtr8g028225	0.943449	0.0383817	1.68133	1.20339e-05	1.75762	2.25903e-06	0	#N/A	3	Putative malate synthase
MtrunA17_Chr5g0414821	Medtr5g036360	1.26358	0.000265737	2.52274	9.26206e-16	2.45968	1.79697e-15	1.36798	1.74742e-05	3	Putative matrilysin
MtrunA17_Chr3g0136211	Medtr3g104990	0	#N/A	0	#N/A	0	#N/A	1.08892	0.00155575	3	Putative mechanosensitive ion channel MscS, LSM domain superfamily
MtrunA17_Chr4g0009811	Medtr4g021725	0	#N/A	-0.626995	0.000289847	0.561112	0.000815848	1.04381	1.59417e-10	3	Putative Metallothionein, family 15, plant
MtrunA17_Chr1g0189071	Medtr1g077890	1.44997	0.00236504	0	#N/A	0	#N/A	0	#N/A	3	Putative methionine gamma-lyase
MtrunA17_Chr1g0163611	Medtr1g036490	0	#N/A	3.09374	7.47386e-15	2.9245	6.62883e-14	1.751	1.01407e-05	3	Putative methyltransferase
MtrunA17_Chr1g0163621	Medtr1g036510	0	#N/A	2.55474	1.21167e-22	2.32489	9.81083e-20	1.49562	1.06028e-08	3	Putative methyltransferase
MtrunA17_Chr1g0200491	Medtr1g096310	3.00098	1.04507e-06	0	#N/A	0	#N/A	0	#N/A	3	Putative methyltransferase
MtrunA17_Chr3g0085201	Medtr3g021430	0	#N/A	1.95204	1.76895e-06	2.32786	3.77096e-09	1.43899	0.000481597	3	Putative methyltransferase
MtrunA17_Chr4g0014641	Medtr4g033150	0	#N/A	0	#N/A	2.27268	6.50762e-05	1.90558	0.00119941	3	Putative methyltransferase
MtrunA17_Chr7g0218211	Medtr7g012020	0	#N/A	1.65263	7.6071e-16	1.89068	1.07565e-20	1.54081	1.6186e-13	3	Putative methyltransferase
MtrunA17_Chr5g0417741	Medtr5g041780	0	#N/A	1.69396	1.0957e-08	2.12277	2.19046e-13	1.33401	8.42448e-06	3	Putative methyltransferase type 11, S-adenosyl-L-methionine-dependent methyltransferase
MtrunA17_Chr5g0405621	Medtr5g022380	0	#N/A	0	#N/A	0	#N/A	1.08247	0.00595502	3	Putative MFS transporter superfamily
MtrunA17_Chr6g0461981	Medtr6g033280	0	#N/A	2.83778	3.37464e-06	3.37439	1.71298e-08	1.51725	0.015511	3	Putative mitochondrial carrier domain superfamily
MtrunA17_Chr2g0328891	Medtr2g098070	0	#N/A	2.55514	1.32479e-15	2.29166	2.80139e-13	1.31736	5.27702e-05	3	Putative mitochondrial carrier protein
MtrunA17_Chr8g0375141	Medtr0189s0010	0	#N/A	2.01996	3.10463e-06	2.80556	1.24236e-11	0	#N/A	3	Putative mitogen-activated protein kinase kinase kinase STE-STE11 family
MtrunA17_Chr5g0397991	Medtr5g010830	0	#N/A	1.27683	4.7758e-05	2.93106	3.30681e-23	1.67188	1.43289e-08	3	Putative multi antimicrobial extrusion protein	MtMATE56	multidrug and toxic compound extrusion family
MtrunA17_Chr5g0436781	Medtr5g082150	0	#N/A	1.58923	5.69998e-09	2.4642	4.18258e-20	0.782524	0.00777841	3	Putative nematode resistance protein-like HSPRO1
MtrunA17_Chr1g0185651	Medtr1g072380	0.840894	0.0154702	2.19838	8.22176e-14	3.14414	2.39881e-26	0.720839	0.0269561	3	Putative nepenthesin
MtrunA17_Chr1g0187841	Medtr1g093100	0.871326	0.00917292	2.45353	5.02866e-18	3.16067	2.59951e-28	1.88222	4.24331e-11	3	Putative nepenthesin
MtrunA17_Chr2g0314471	Medtr2g073050	0	#N/A	1.17172	0.0244112	2.43642	1.2683e-07	1.15899	0.0189286	3	Putative neprosin
MtrunA17_Chr5g0445181	Medtr5g094280	0	#N/A	1.36983	0.00419156	2.31997	1.63779e-07	1.81397	8.35426e-05	3	Putative neprosin
MtrunA17_Chr5g0414331	Medtr5g035580	0	#N/A	0	#N/A	0	#N/A	1.1049	0.00850827	3	Putative N-hydroxythioamide S-beta-glucosyltransferase
MtrunA17_Chr2g0304481	Medtr2g450870	0	#N/A	1.53533	1.14176e-13	1.75281	1.7197e-18	0.755619	0.000406997	3	Putative non-specific serine/threonine protein kinase
MtrunA17_Chr7g0241491	Medtr7g066620	0	#N/A	0	#N/A	0.831757	0.0258241	1.14971	0.00211589	3	Putative non-specific serine/threonine protein kinase
MtrunA17_Chr1g0194251	Medtr1g086450	0	#N/A	0	#N/A	0	#N/A	1.02029	0.000727765	3	Putative NPR1/NH1-interacting protein
MtrunA17_Chr4g0053701	Medtr4g095075	0	#N/A	0	#N/A	0	#N/A	1.13727	4.95544e-05	3	Putative NRAMP family protein	MtNRAMP7	Natural Resistance-Associated Macrophage Protein7
MtrunA17_Chr4g0032181	Medtr4g064887	0	#N/A	2.08158	4.85425e-13	2.37477	7.56966e-17	1.50517	2.39806e-07	3	Putative oxidoreductase
MtrunA17_Chr7g0232091	Medtr7g045370	0	#N/A	0	#N/A	0	#N/A	1.5831	2.66753e-05	3	Putative oxidoreductase	MtCCD7	carotenoid cleavage dioxygenase 7
MtrunA17_Chr4g0052881	#N/A	-1.32456	5.59322e-05	0.88074	0.00711036	0.840315	0.00654506	0.948047	0.00258426	3	Putative oxidoreductase
MtrunA17_Chr1g0184101	Medtr1g070080	0	#N/A	1.39874	6.30337e-19	1.99041	1.32677e-36	1.38608	1.21674e-17	3	Putative oxoglutarate/iron-dependent dioxygenase, non-haem dioxygenase domain-containing protein
MtrunA17_Chr3g0093761	Medtr3g043900	0	#N/A	2.29224	6.47404e-13	2.45727	4.78632e-15	0.852019	0.0124656	3	Putative oxoglutarate/iron-dependent dioxygenase, non-haem dioxygenase domain-containing protein
MtrunA17_Chr3g0138351	Medtr3g108520	0	#N/A	1.02327	0.000211156	1.34226	2.4792e-07	2.08607	6.72116e-15	3	Putative oxoglutarate/iron-dependent dioxygenase, non-haem dioxygenase domain-containing protein
MtrunA17_Chr6g0455481	Medtr6g015950	0	#N/A	1.76846	2.13125e-16	1.91631	3.18459e-20	1.92721	9.14481e-20	3	Putative oxoglutarate/iron-dependent dioxygenase, non-haem dioxygenase domain-containing protein
MtrunA17_Chr5g0437861	Medtr5g083690	0	#N/A	0	#N/A	1.5797	2.3645e-08	0.975209	0.00117873	3	Putative PAM2-containing protein CID1/CID2
MtrunA17_Chr1g0153781	Medtr1g019940	0	#N/A	2.56302	7.58299e-22	2.59761	6.82123e-23	1.3417	5.83439e-07	3	Putative patatin-like phospholipase domain, Acyl transferase/acyl hydrolase/lysophospholipase
MtrunA17_Chr4g0058471	Medtr4g104900	0	#N/A	0	#N/A	1.61334	0.0114513	1.81785	0.0053524	3	Putative PB1 domain-containing protein
MtrunA17_Chr3g0079351	Medtr3g008700	0	#N/A	0	#N/A	0.819049	0.0121479	1.14096	0.000696433	3	Putative pectinesterase
MtrunA17_Chr4g0018281	Medtr4g035905	0	#N/A	0	#N/A	3.10133	2.95902e-08	0	#N/A	3	Putative pectinesterase
MtrunA17_Chr7g0269511	Medtr7g108875	0	#N/A	0	#N/A	2.15307	1.80639e-20	0.842631	0.000686721	3	Putative pectinesterase
MtrunA17_Chr7g0230081	Medtr0018s0230	0	#N/A	1.3747	6.43854e-05	1.01828	0.00183333	1.67205	1.88566e-07	3	Putative periplasmic binding protein-like I
MtrunA17_Chr4g0046101	Medtr4g087925	0	#N/A	3.39306	2.75841e-26	2.9661	1.40773e-23	1.13627	0.000160239	3	Putative periplasmic binding protein-like I
MtrunA17_Chr5g0424521	Medtr5g059900	0	#N/A	1.87564	1.48236e-08	1.80632	9.65689e-09	2.23954	3.33478e-12	3	Putative periplasmic binding protein-like I
MtrunA17_Chr5g0424541	Medtr5g059920	0	#N/A	0	#N/A	0.768958	1.18172e-11	1.00568	3.34209e-18	3	Putative periplasmic binding protein-like I
MtrunA17_Chr1g0155611	Medtr1g022970	1.15375	8.56051e-07	-0.748388	0.00169137	0	#N/A	0	#N/A	3	Putative peroxidase	MtPrx45	peroxidase
MtrunA17_Chr2g0292091	Medtr2g029560	0	#N/A	1.73346	5.39324e-09	1.87262	9.6799e-11	0.775262	0.014853	3	Putative peroxidase	MtRip3;MtPrx111	peroxidase
MtrunA17_Chr2g0299691	Medtr2g040000	1.26812	0.00338373	0	#N/A	0	#N/A	0	#N/A	3	Putative peroxidase	MtPrx27	peroxidase
MtrunA17_Chr2g0320051	Medtr2g084010	0	#N/A	0	#N/A	1.35527	1.63387e-05	0.989491	0.00598649	3	Putative peroxidase	MtLIP;MtPrx43	Lignin biosynthetic peroxidase;peroxidase 43
MtrunA17_Chr2g0320071	Medtr2g084080	0	#N/A	1.6676	4.73483e-06	2.36737	1.92559e-11	1.04324	0.00878164	3	Putative peroxidase	MtPrx57	peroxidase 57
MtrunA17_Chr3g0129041	Medtr3g094630	0	#N/A	1.49036	0.0136303	1.34708	0.0174857	1.86284	0.00117021	3	Putative peroxidase	MtPRX1	peroxidase 1
MtrunA17_Chr3g0129061	Medtr3g094670	0	#N/A	1.41914	0.0170707	0	#N/A	1.57338	0.00548582	3	Putative peroxidase
MtrunA17_Chr3g0106901	Medtr3g466180	0	#N/A	2.73854	8.61996e-10	2.38824	4.11821e-08	2.59067	1.01574e-08	3	Putative peroxidase
MtrunA17_Chr4g0013171	Medtr4g029170	1.33718	0.00172415	3.44781	4.92644e-19	2.4173	7.47529e-11	0	#N/A	3	Putative peroxidase	MtPrx81	MtRip8;peroxidase
MtrunA17_Chr4g0013181	Medtr4g029180	1.5628	5.25562e-10	2.7064	5.75923e-34	2.40157	1.53611e-28	0.825209	0.000266161	3	Putative peroxidase	MtPrx49	peroxidase
MtrunA17_Chr5g0400331	Medtr5g014100	1.44113	0.00192613	0	#N/A	0	#N/A	0	#N/A	3	Putative peroxidase	MtPrx90	peroxidase
MtrunA17_Chr5g0402571	Medtr5g017850	1.72407	2.48778e-06	2.30139	1.02872e-11	1.7118	2.24295e-07	0.744642	0.0436446	3	Putative peroxidase	MtPrx52	peroxidase
MtrunA17_Chr5g0438021	Medtr5g083860	0	#N/A	0	#N/A	1.08177	2.31437e-05	1.57093	1.21544e-09	3	Putative peroxidase	MtPrx22	peroxidase
MtrunA17_Chr2g0288651	Medtr2g023660	0	#N/A	2.07371	3.82292e-10	2.67808	5.71246e-17	0.832067	0.0168896	3	Putative petal formation-expressed
MtrunA17_Chr2g0288681	Medtr2g023730	0	#N/A	1.37777	4.22058e-08	2.19078	1.72105e-20	0.649829	0.0127511	3	Putative petal formation-expressed
MtrunA17_Chr4g0075151	Medtr4g132380	0	#N/A	1.7687	2.13207e-10	2.37791	2.49385e-18	0.922418	0.00156355	3	Putative petal formation-expressed
MtrunA17_Chr7g0235131	Medtr7g055630	1.04847	0.00187136	1.50813	5.37613e-07	1.55165	1.06975e-07	0.970618	0.00179296	3	Putative PGG domain-containing protein
MtrunA17_Chr7g0264351	Medtr7g101425	0.687299	0.0441552	1.66891	1.5562e-09	2.02801	6.68755e-14	0.683371	0.0237246	3	Putative phenylalanine ammonia-lyase
MtrunA17_Chr7g0264341	#N/A	0.890204	0.00185751	1.93577	7.37653e-15	2.11103	8.64067e-18	0	#N/A	3	Putative phenylalanine ammonia-lyase
MtrunA17_Chr1g0203281	Medtr1g100597	0	#N/A	0	#N/A	1.09266	0.00118215	1.13448	0.000920395	3	Putative phloem protein
MtrunA17_Chr7g0272091	Medtr7g112550	0	#N/A	1.38434	6.46393e-17	1.83425	2.5272e-29	0.845481	6.0699e-07	3	Putative phloem protein
MtrunA17_Chr5g0408931	Medtr5g026360	0	#N/A	0	#N/A	0	#N/A	1.31368	0.00040643	3	Putative phosphatidyl-myo-inositol alpha-mannosyltransferase
MtrunA17_Chr2g0315891	Medtr2g076670	0	#N/A	0.492323	0.0248529	0	#N/A	1.21523	3.49996e-10	3	Putative phosphoenolpyruvate carboxylase
MtrunA17_Chr8g0345601	Medtr8g023770	0	#N/A	1.10724	0.00266327	1.81553	7.6116e-08	1.05711	0.00344632	3	Putative phosphoesterase
MtrunA17_Chr3g0145681	Medtr3g118020	0	#N/A	2.09962	3.14518e-13	1.81534	1.45068e-10	0.949404	0.00169834	3	Putative phospholipase
MtrunA17_Chr5g0398161	Medtr5g011050	0.506543	0.00663301	1.49557	2.33982e-22	1.62384	8.04392e-27	0.916888	4.55772e-09	3	Putative phospholipase D
MtrunA17_Chr5g0398171	Medtr5g011060	0	#N/A	1.65336	1.24711e-13	1.58875	7.26125e-13	1.57727	2.82157e-11	3	Putative phospholipase D
MtrunA17_Chr1g0201341	Medtr1g097850	0	#N/A	0	#N/A	1.98907	1.35162e-20	0.692178	0.00285375	3	Putative phosphotransferase with an alcohol group as acceptor
MtrunA17_Chr4g0039721	Medtr4g077787	0	#N/A	0	#N/A	0	#N/A	1.09868	8.33569e-07	3	Putative Phytocyanin domain, cupredoxin	MtENODL20;MtPCY64	ENOD-like 20;Plantacyanin/Chemocyanin 64
MtrunA17_Chr2g0331531	Medtr2g101660	0.702672	0.00170441	1.36739	1.87174e-12	2.20641	1.19985e-30	1.80879	1.99167e-20	3	Putative PLAC8 motif-containing protein
MtrunA17_Chr8g0391441	Medtr8g104890	0.64876	0.0387968	2.31212	3.27632e-20	2.57105	6.54648e-25	1.36143	7.74466e-08	3	Putative PLAC8 motif-containing protein
MtrunA17_Chr2g0309241	Medtr2g062600	2.10886	3.87642e-05	0	#N/A	0	#N/A	0	#N/A	3	Putative plant lipid transfer protein/Par allergen	MtnsLTP5	non-specific Lipid Transfer Protein
MtrunA17_Chr4g0070001	Medtr4g124650	0	#N/A	0	#N/A	0	#N/A	1.06662	0.00035085	3	Putative plus-end-directed kinesin ATPase
MtrunA17_Chr5g0413851	Medtr5g034810	0	#N/A	0	#N/A	0	#N/A	1.73374	5.0915e-14	3	Putative PMR5 domain, PC-Esterase
MtrunA17_Chr8g0386691	#N/A	0	#N/A	2.38729	1.29073e-12	3.21961	6.86131e-22	0.787775	0.0314785	3	Putative poly(A)-specific ribonuclease
MtrunA17_Chr8g0386681	#N/A	0	#N/A	2.50508	2.65347e-12	2.99598	1.93773e-17	1.12822	0.00256947	3	Putative poly(A)-specific ribonuclease
MtrunA17_Chr3g0117631	Medtr3g077870	0	#N/A	0	#N/A	0	#N/A	1.86204	0.00138288	3	Putative poly(ADP-ribose) polymerase, catalytic domain, RST domain of plant
MtrunA17_Chr5g0403351	Medtr5g019010	0	#N/A	2.78337	8.74322e-17	2.44387	8.21683e-14	1.74167	1.87131e-07	3	Putative premnaspirodiene oxygenase
MtrunA17_Chr5g0445441	Medtr5g094550	0	#N/A	0	#N/A	2.91962	2.49935e-08	1.2264	0.0300724	3	Putative premnaspirodiene oxygenase
MtrunA17_Chr5g0445461	Medtr5g094570	0	#N/A	0	#N/A	2.20725	3.67155e-08	-0.993592	0.0255087	3	Putative premnaspirodiene oxygenase
MtrunA17_Chr7g0258261	Medtr7g092700	0	#N/A	2.3343	1.66329e-14	2.34518	4.52984e-15	0.867591	0.00738475	3	Putative prenylated rab acceptor PRA1
MtrunA17_Chr3g0128631	Medtr3g093780	0	#N/A	0.924898	0.00212462	1.77171	6.50361e-11	0.756107	0.0116724	3	Putative probable zinc-ribbon domain, plant, protein enhanced disease resistance 4
MtrunA17_Chr1g0152341	Medtr1g017830	0	#N/A	1.69201	5.24665e-13	2.62059	7.37881e-29	1.61736	8.92969e-12	3	putative protein
MtrunA17_Chr1g0156671	Medtr1g025340	1.13213	0.0098166	1.98816	2.16368e-08	2.66103	1.72683e-14	1.8491	1.54974e-07	3	putative protein
MtrunA17_Chr1g0170821	Medtr1g049240	0	#N/A	0	#N/A	0.945107	1.44861e-05	1.38682	1.28112e-10	3	putative protein	MtTPD3	Tapetum Determinant
MtrunA17_Chr1g0175131	Medtr1g053900	0	#N/A	1.60557	7.05798e-10	1.49615	2.36412e-09	0.646901	0.020114	3	putative protein
MtrunA17_Chr1g0188241	Medtr1g076800	0	#N/A	0	#N/A	0.782584	0.043085	1.10546	0.00419726	3	putative protein
MtrunA17_Chr1g0207781	Medtr1g107215	0	#N/A	2.52262	1.22777e-35	2.32609	2.70159e-31	0.97481	2.09278e-06	3	putative protein
MtrunA17_Chr2g0281091	Medtr2g011690	0	#N/A	0	#N/A	0	#N/A	2.13444	1.40108e-09	3	putative protein
MtrunA17_Chr2g0317651	Medtr2g079300	0	#N/A	1.16464	0.00045419	2.05858	2.13685e-11	1.30171	4.29199e-05	3	putative protein
MtrunA17_Chr2g0323541	Medtr2g089815	0.760486	0.0176452	1.13813	6.12548e-05	1.6265	6.89937e-10	1.20321	6.28626e-06	3	putative protein
MtrunA17_Chr2g0323571	Medtr2g089865	0	#N/A	1.23493	0.00444311	1.67132	2.98326e-05	2.16456	9.81363e-08	3	putative protein
MtrunA17_Chr2g0323631	Medtr2g089930	0	#N/A	1.54255	0.00465263	1.83704	0.000288646	2.31813	6.31058e-06	3	putative protein
MtrunA17_Chr2g0323681	Medtr2g089965	0	#N/A	0	#N/A	1.47109	0.00922012	2.26342	6.21389e-05	3	putative protein
MtrunA17_Chr2g0323701	Medtr2g089970	0	#N/A	0	#N/A	0	#N/A	1.65552	0.00200811	3	putative protein
MtrunA17_Chr2g0323711	Medtr2g089985	0	#N/A	0	#N/A	0	#N/A	2.41225	1.18502e-06	3	putative protein
MtrunA17_Chr2g0323721	Medtr2g089990	0	#N/A	0	#N/A	1.03861	0.0302714	2.02371	1.44463e-05	3	putative protein
MtrunA17_Chr2g0328111	Medtr2g096870	0.476158	0.0352029	1.60847	2.97248e-19	2.05564	1.07761e-30	0.69841	0.000214081	3	putative protein
MtrunA17_Chr2g0318611	Medtr2g481160	0	#N/A	0	#N/A	0	#N/A	2.44942	0.00207178	3	putative protein
MtrunA17_Chr4g0011241	Medtr4g024370	0.86177	0.00424155	1.42573	6.93236e-08	1.53447	1.26754e-09	0.997016	0.000164371	3	putative protein
MtrunA17_Chr4g0022611	Medtr4g045990	0	#N/A	0	#N/A	0	#N/A	2.69754	3.65069e-05	3	putative protein
MtrunA17_Chr4g0029291	Medtr4g059670	0	#N/A	0	#N/A	0	#N/A	1.45168	0.0023157	3	putative protein	MtRC8	Root Cap 8
MtrunA17_Chr4g0044361	Medtr4g085100	0	#N/A	1.90853	7.52021e-19	2.10918	4.65662e-23	1.0508	1.96282e-06	3	putative protein
MtrunA17_Chr4g0045231	Medtr4g086620	0.91276	8.13674e-05	2.28133	9.16826e-28	2.76879	1.33765e-39	1.24712	3.13014e-09	3	putative protein
MtrunA17_Chr5g0403161	Medtr5g018720	1.12818	0.000443968	-0.758664	0.0145952	0	#N/A	0.724617	0.00901149	3	putative protein
MtrunA17_Chr5g0403421	Medtr5g019120	2.15337	2.39928e-06	0	#N/A	0	#N/A	0	#N/A	3	putative protein
MtrunA17_Chr5g0414391	Medtr5g035670	0	#N/A	1.23745	0.000149895	1.79205	4.38521e-09	2.3701	5.15509e-14	3	putative protein
MtrunA17_Chr5g0414421	Medtr5g035690	0	#N/A	1.7204	8.47979e-09	2.58032	9.60662e-20	1.29513	9.31319e-06	3	putative protein
MtrunA17_Chr5g0441951	Medtr5g089820	0	#N/A	1.59081	2.13125e-16	2.54406	3.70258e-39	1.03094	1.61228e-07	3	putative protein
MtrunA17_Chr5g0444601	Medtr5g093430	1.39372	0.00439897	1.14364	0.0171803	2.22275	1.68705e-07	0	#N/A	3	putative protein
MtrunA17_Chr5g0444611	Medtr5g093440	1.28769	1.82936e-05	1.17699	5.61278e-05	2.09128	1.8169e-14	0	#N/A	3	putative protein
MtrunA17_Chr6g0454011	Medtr6g013750	0	#N/A	-0.690891	1.54273e-05	-0.768211	4.90407e-07	-1.08725	1.67309e-12	3	putative protein
MtrunA17_Chr0c01g0489311	Medtr6g472110	0.994626	0.0134207	2.83361	2.63447e-17	3.37945	6.20762e-24	0.804529	0.0256273	3	putative protein
MtrunA17_Chr7g0223501	Medtr7g025130	0	#N/A	1.85683	9.20762e-07	2.04508	2.43812e-08	1.31508	0.00061654	3	putative protein
MtrunA17_Chr8g0384101	Medtr8g093440	0	#N/A	0	#N/A	0	#N/A	1.55305	2.18571e-07	3	putative protein
MtrunA17_Chr8g0360691	Medtr8g464300	0	#N/A	0	#N/A	0	#N/A	1.35207	0.00316307	3	putative protein	MtRC9	Root Cap 9
MtrunA17_Chr3g0096111	#N/A	0	#N/A	1.78808	1.75103e-06	2.4638	6.46857e-12	2.22094	2.44827e-09	3	putative protein
MtrunA17_Chr4g0019731	#N/A	0.790491	0.00995139	2.24686	2.46052e-18	2.38143	7.36504e-21	0	#N/A	3	putative protein
MtrunA17_Chr2g0292801	#N/A	0	#N/A	0	#N/A	0	#N/A	2.23242	0.00249385	3	putative protein
MtrunA17_Chr4g0066481	Medtr4g118470	0	#N/A	3.33229	6.60925e-15	3.4213	4.98244e-17	0	#N/A	3	Putative protein DMP
MtrunA17_Chr7g0220691	Medtr7g018090	0	#N/A	0	#N/A	0	#N/A	1.00835	0.00211327	3	Putative protein glutamine dumper
MtrunA17_Chr7g0267751	Medtr7g106710	0	#N/A	0	#N/A	3.4797	4.09658e-23	0	#N/A	3	Putative protein kinase CAMK-CDPK family	MtCDPK11	calcium-dependent protein kinase11
MtrunA17_Chr1g0206461	Medtr1g105755	0	#N/A	1.61929	1.46041e-10	1.83336	5.609e-14	1.44448	9.21759e-09	3	Putative protein kinase RLK-Pelle-DLSV family
MtrunA17_Chr1g0206521	Medtr1g105800	0	#N/A	2.57952	1.23156e-12	2.41142	7.37074e-12	1.07544	0.00431231	3	Putative protein kinase RLK-Pelle-DLSV family
MtrunA17_Chr2g0280791	Medtr2g011270	0	#N/A	1.93487	1.6379e-10	2.71324	1.02757e-20	1.06247	0.00045146	3	Putative protein kinase RLK-Pelle-DLSV family
MtrunA17_Chr2g0318811	Medtr2g081470	0	#N/A	1.60007	5.21894e-12	2.48105	4.08037e-27	0.97777	3.4184e-05	3	Putative protein kinase RLK-Pelle-DLSV family
MtrunA17_Chr2g0318841	Medtr2g081520	0.706591	0.000140018	1.65918	2.10499e-23	2.17637	2.86806e-39	0.970791	1.29577e-08	3	Putative protein kinase RLK-Pelle-DLSV family
MtrunA17_Chr3g0078521	Medtr3g007510	0	#N/A	1.12121	2.98774e-09	1.70851	7.6585e-21	1.05295	2.29044e-08	3	Putative protein kinase RLK-Pelle-DLSV family
MtrunA17_Chr3g0084491	Medtr3g019580	0	#N/A	0	#N/A	0.334614	0.0464715	1.04228	1.6106e-11	3	Putative protein kinase RLK-Pelle-DLSV family
MtrunA17_Chr3g0109431	Medtr3g064090	0	#N/A	1.9893	1.23204e-22	2.10398	1.28225e-25	0.517303	0.0214882	3	Putative protein kinase RLK-Pelle-DLSV family
MtrunA17_Chr3g0109461	Medtr3g064110	0.543521	0.0190614	1.3705	1.12084e-13	1.59014	1.61419e-18	1.22201	7.24474e-11	3	Putative protein kinase RLK-Pelle-DLSV family
MtrunA17_Chr4g0042341	Medtr4g081640	0	#N/A	1.97176	1.56594e-13	2.44661	5.96868e-21	1.4329	5.77863e-08	3	Putative protein kinase RLK-Pelle-DLSV family
MtrunA17_Chr5g0393981	Medtr5g005450	0	#N/A	1.71153	3.38385e-13	2.24404	2.04792e-22	0.853554	0.000546413	3	Putative protein kinase RLK-Pelle-DLSV family
MtrunA17_Chr5g0394001	Medtr5g005480	0	#N/A	2.16871	3.58861e-20	2.48198	2.41437e-26	0.697054	0.00646217	3	Putative protein kinase RLK-Pelle-DLSV family
MtrunA17_Chr5g0394011	Medtr5g005520	0	#N/A	0.524256	0.009381	0	#N/A	1.22288	7.36672e-12	3	Putative protein kinase RLK-Pelle-DLSV family
MtrunA17_Chr5g0394021	Medtr5g005530	0	#N/A	0.723603	0.000143935	0.599217	0.000944564	1.06234	1.33376e-09	3	Putative protein kinase RLK-Pelle-DLSV family
MtrunA17_Chr7g0236691	Medtr7g056680	0	#N/A	1.66184	3.93225e-08	1.59392	2.48192e-08	1.44093	7.28897e-07	3	Putative protein kinase RLK-Pelle-DLSV family
MtrunA17_Chr8g0358821	Medtr8g461110	0.585779	0.0109641	1.54742	5.12256e-16	1.42662	3.38364e-14	0.601641	0.00351412	3	Putative protein kinase RLK-Pelle-DLSV family
MtrunA17_Chr8g0361141	Medtr8g465150	0	#N/A	1.53512	3.2682e-11	1.58831	1.27423e-12	0.731197	0.0024202	3	Putative protein kinase RLK-Pelle-DLSV family
MtrunA17_Chr8g0361261	Medtr8g465470	0	#N/A	2.23063	2.48214e-20	2.9221	2.7184e-33	1.24005	4.27608e-07	3	Putative protein kinase RLK-Pelle-DLSV family
MtrunA17_Chr8g0361301	Medtr8g465570	0	#N/A	1.86942	8.33183e-16	2.41216	2.01687e-25	1.15857	1.20634e-06	3	Putative protein kinase RLK-Pelle-DLSV family
MtrunA17_Chr8g0361441	Medtr8g465990	0	#N/A	1.56334	3.51359e-13	2.41621	2.04784e-29	1.29298	3.15133e-09	3	Putative protein kinase RLK-Pelle-DLSV family
MtrunA17_Chr1g0175451	Medtr0015s0030	0	#N/A	1.57971	8.04675e-09	2.78762	3.49465e-25	0.998225	0.000309399	3	Putative protein kinase RLK-Pelle-L-LEC family
MtrunA17_Chr4g0049601	Medtr4g093080	0	#N/A	1.79632	3.87376e-07	2.18901	1.52483e-10	1.22787	0.000654725	3	Putative protein kinase RLK-Pelle-L-LEC family
MtrunA17_Chr7g0239321	Medtr7g062940	0	#N/A	1.08136	0.000538947	1.73544	1.31727e-09	0.831711	0.00772148	3	Putative protein kinase RLK-Pelle-L-LEC family
MtrunA17_Chr4g0049611	#N/A	0	#N/A	2.43571	1.96863e-13	2.60923	9.02129e-16	1.86291	1.97465e-08	3	Putative protein kinase RLK-Pelle-L-LEC family
MtrunA17_Chr5g0432871	Medtr5g075650	0.781215	0.000190127	1.72261	1.47119e-20	2.27748	1.11796e-34	1.52777	4.4907e-16	3	Putative protein kinase RLK-Pelle-LRR-VIII-1 family
MtrunA17_Chr1g0197051	Medtr1g090520	0	#N/A	1.27741	8.95596e-10	2.18975	9.7e-27	0.712456	0.00114232	3	Putative protein kinase RLK-Pelle-LRR-XI-1 family
MtrunA17_Chr6g0487031	Medtr6g088785	0	#N/A	1.82463	2.87802e-16	2.08794	2.53808e-21	1.22296	6.92257e-08	3	Putative protein kinase RLK-Pelle-LRR-XI-1 family
MtrunA17_Chr7g0250471	Medtr7g081780	0	#N/A	1.02473	0.00925727	2.34431	2.42325e-11	0.804107	0.0394912	3	Putative protein kinase RLK-Pelle-LRR-XI-1 family
MtrunA17_Chr3g0095201	Medtr3g449540	0	#N/A	0	#N/A	1.68978	0.00139397	1.23155	0.0282852	3	Putative protein kinase RLK-Pelle-LRR-XII-1 family
MtrunA17_Chr4g0073641	Medtr4g130390	0	#N/A	1.47559	1.40589e-05	2.55798	5.57712e-15	-0.832084	0.0210135	3	Putative protein kinase RLK-Pelle-LRR-XII-1 family
MtrunA17_Chr5g0419221	Medtr5g044680	0	#N/A	2.53533	1.97696e-18	3.21306	1.79574e-28	1.65966	8.59415e-09	3	Putative protein kinase RLK-Pelle-LRR-XII-1 family
MtrunA17_Chr8g0360851	#N/A	0.733062	0.0201831	2.12853	2.67847e-16	2.06223	5.39241e-16	2.17841	1.28474e-16	3	Putative protein kinase RLK-Pelle-LRR-XII-1 family
MtrunA17_Chr1g0159611	Medtr1g029610	0.54806	0.0179672	1.26781	2.68075e-11	1.79317	6.35138e-22	0.471194	0.0260153	3	Putative protein kinase RLK-Pelle-RKF3 family
MtrunA17_Chr1g0196381	Medtr1g089570	0	#N/A	1.5152	7.17482e-12	2.20706	3.12066e-24	0.640309	0.00707633	3	Putative protein kinase RLK-Pelle-RLCK-VI family
MtrunA17_Chr2g0314611	Medtr2g073250	0	#N/A	1.2259	4.15057e-06	1.83839	2.38065e-13	0.825348	0.00280115	3	Putative protein kinase RLK-Pelle-SD-2b family
MtrunA17_Chr3g0134291	Medtr3g102400	0	#N/A	0.963274	1.29777e-07	1.88175	9.42355e-27	1.18173	6.12298e-11	3	Putative protein kinase RLK-Pelle-SD-2b family
MtrunA17_Chr0c04g0492001	#N/A	0.68113	0.0179638	1.2142	1.76082e-07	2.26656	7.20004e-25	1.26229	2.05372e-08	3	Putative protein kinase RLK-Pelle-SD-2b family
MtrunA17_Chr0c04g0492031	#N/A	0	#N/A	1.09093	4.3043e-06	1.8131	4.4918e-16	1.24177	7.77067e-08	3	Putative protein kinase RLK-Pelle-SD-2b family
MtrunA17_Chr7g0251121	Medtr7g082530	0	#N/A	1.44045	3.49976e-18	1.86964	6.9405e-30	0.776996	6.30038e-06	3	Putative protein kinase RLK-Pelle-WAK-LRK10L-1 family
MtrunA17_Chr8g0376061	#N/A	0	#N/A	2.01921	5.09037e-24	2.39714	1.20044e-33	1.47391	2.30872e-13	3	Putative protein kinase RLK-Pelle-WAK-LRK10L-1 family
MtrunA17_Chr1g0187161	Medtr1g075340	0	#N/A	0.971074	1.00978e-05	2.52248	1.77073e-32	1.1249	1.90221e-07	3	Putative proteinase inhibitor I13, potato inhibitor I	MtSubIn3	Subtilisin inhibitor
MtrunA17_Chr1g0187201	Medtr1g075380	1.51148	2.0826e-05	0.934443	0.0132097	1.92773	4.05586e-09	0	#N/A	3	Putative proteinase inhibitor I13, potato inhibitor I	MtSubIn4	Subtilisin inhibitor
MtrunA17_Chr1g0184401	#N/A	0	#N/A	0	#N/A	0	#N/A	1.61938	4.21831e-09	3	Putative proteinase inhibitor I13, potato inhibitor I
MtrunA17_Chr7g0258871	Medtr7g093490	1.05557	0.00191938	0	#N/A	0	#N/A	0	#N/A	3	Putative protein-disulfide reductase
MtrunA17_Chr1g0166481	Medtr1g041475	0	#N/A	1.58818	2.01997e-12	2.09019	1.55035e-21	1.80939	7.3102e-16	3	Putative protein-serine/threonine phosphatase
MtrunA17_Chr1g0187481	Medtr1g075730	0	#N/A	0	#N/A	0	#N/A	1.54843	1.78905e-06	3	Putative protein-serine/threonine phosphatase
MtrunA17_Chr3g0115851	Medtr3g074610	1.02022	0.00268372	2.15527	1.51617e-13	2.49421	1.7197e-18	1.39712	8.27465e-07	3	Putative protein-serine/threonine phosphatase
MtrunA17_Chr3g0105371	Medtr3g464700	0	#N/A	1.44749	4.49382e-09	2.26253	4.87202e-22	1.15534	1.77461e-06	3	Putative protein-serine/threonine phosphatase
MtrunA17_Chr7g0249271	Medtr7g079970	0	#N/A	1.30491	4.25398e-11	1.68153	2.41141e-18	0.680544	0.00114689	3	Putative protein-tyrosine-phosphatase
MtrunA17_Chr1g0187241	Medtr1g075440	0	#N/A	1.89136	4.41145e-26	1.71674	2.28448e-22	0.615417	0.00126731	3	Putative proton-dependent oligopeptide transporter family, MFS transporter superfamily	MtNPF5.13	NRT1/ PTR FAMILY;nitrate transporter / peptide transporter
MtrunA17_Chr2g0298031	Medtr2g036650	0	#N/A	0.932407	1.76737e-06	0	#N/A	1.3148	6.78608e-12	3	Putative P-type H(+)-exporting transporter	MtAHA5	(Plasma membrane proton pump, TC121827)
MtrunA17_Chr3g0078371	Medtr3g007240	0	#N/A	1.67519	1.27631e-17	2.05393	5.22305e-26	0.995965	7.77218e-07	3	Putative P-type phospholipid transporter
MtrunA17_Chr2g0283471	Medtr2g015560	0	#N/A	0	#N/A	0	#N/A	2.02456	2.69191e-09	3	Putative pyruvate decarboxylase	MtPDC	pyruvate decarboxylase
MtrunA17_Chr7g0242961	Medtr7g069500	0	#N/A	0	#N/A	0	#N/A	1.69201	6.71655e-05	3	Putative pyruvate decarboxylase
MtrunA17_Chr4g0066391	#N/A	0	#N/A	0.905824	0.0322219	0	#N/A	1.28406	0.00177379	3	Putative pyruvate, phosphate dikinase
MtrunA17_Chr4g0041821	Medtr4g081110	0.901096	0.00325864	1.48199	1.00673e-07	1.93634	7.18882e-13	0.907154	0.00151303	3	Putative Rab-GTPase-TBC domain-containing protein
MtrunA17_Chr3g0127941	Medtr3g092780	1.21177	1.60654e-07	0	#N/A	0	#N/A	0	#N/A	3	Putative response regulator and transcription factor RR-A-type family	MtPRR3	pseudo response regulator ( clock-RR) 3
MtrunA17_Chr5g0411781	Medtr5g031170	0	#N/A	0	#N/A	0	#N/A	1.06847	2.64908e-05	3	Putative rhamnogalacturonan endolyase
MtrunA17_Chr4g0072241	Medtr4g127870	0	#N/A	0	#N/A	0	#N/A	1.39998	9.11906e-05	3	Putative ribulose-bisphosphate carboxylase
MtrunA17_Chr1g0183081	Medtr1g069370	0	#N/A	1.24415	2.81175e-09	1.64581	2.1553e-16	0.719329	0.00105141	3	Putative rmlC-like cupin domain superfamily, rmlC-like jelly roll protein
MtrunA17_Chr4g0037211	Medtr4g073530	0	#N/A	0	#N/A	2.80306	1.06518e-13	0	#N/A	3	Putative senescence/spartin-associated
MtrunA17_Chr3g0141021	Medtr3g111150	0	#N/A	0	#N/A	1.23032	0.0101501	1.64007	0.000648907	3	Putative Serpin family protein
MtrunA17_Chr3g0134041	Medtr3g101900	0	#N/A	1.66696	5.0243e-19	1.84946	1.60758e-23	1.02724	8.01029e-08	3	Putative shikimate O-hydroxycinnamoyltransferase
MtrunA17_Chr5g0399131	Medtr5g012410	0	#N/A	0	#N/A	1.26314	0.0169319	1.7963	0.000732843	3	Putative short transmembrane mitochondrial protein
MtrunA17_Chr8g0349721	Medtr8g031900	0	#N/A	2.39542	2.03269e-13	1.89844	1.53106e-09	0.846411	0.0133725	3	Putative short-chain dehydrogenase/reductase SDR, NAD(P)-binding domain superfamily
MtrunA17_Chr3g0082031	#N/A	0	#N/A	1.25222	5.12238e-07	1.70616	9.98689e-13	0.805894	0.00187848	3	Putative sigma factor binding protein 1/2
MtrunA17_Chr4g0036891	Medtr4g072980	0	#N/A	0	#N/A	0	#N/A	1.96792	1.18255e-05	3	Putative small auxin-up RNA
MtrunA17_Chr8g0344811	Medtr8g022440	0	#N/A	0	#N/A	0	#N/A	1.02893	0.000198153	3	Putative small auxin-up RNA
MtrunA17_Chr4g0068171	Medtr4g121860	0	#N/A	0	#N/A	1.1369	8.44881e-06	1.10805	2.31737e-05	3	Putative small GTP-binding protein
MtrunA17_Chr5g0436181	Medtr5g081530	0	#N/A	0	#N/A	1.49621	0.00461715	1.4096	0.0105401	3	Putative small heat shock protein HSP20
MtrunA17_Chr1g0159321	Medtr1g029150	1.67176	0.0236924	0	#N/A	0	#N/A	2.05654	0.00106294	3	Putative stearoyl-[acyl-carrier-protein] 9-desaturase
MtrunA17_Chr4g0022351	Medtr4g044463	0	#N/A	0	#N/A	0	#N/A	1.53017	0.00194272	3	Putative stigma-specific protein Stig1	MtSTIG/GRI_2	Stigma1 / GRI
MtrunA17_Chr1g0188451	Medtr1g077030	0	#N/A	0.980867	1.6976e-08	1.63359	2.24648e-22	0.795139	6.79857e-06	3	Putative stizolobate synthase
MtrunA17_Chr2g0301621	Medtr2g044070	0	#N/A	0	#N/A	0.474515	0.0134047	1.12397	7.59404e-10	3	Putative sucrose synthase
MtrunA17_Chr7g0271211	Medtr7g111240	0	#N/A	0.37686	0.0120415	0.635669	1.76985e-06	1.06213	1.67458e-15	3	Putative superoxide dismutase
MtrunA17_Chr1g0177121	Medtr1g056550	0	#N/A	1.54453	1.27324e-22	1.92596	1.35889e-34	0.722873	1.08681e-05	3	Putative target SNARE coiled-coil domain, syntaxin domain-containing protein
MtrunA17_Chr7g0267551	Medtr7g106420	0.801631	0.00631477	2.36013	5.60783e-22	3.16644	2.09138e-37	1.24608	3.91e-07	3	Putative target SNARE coiled-coil domain, syntaxin domain-containing protein
MtrunA17_Chr2g0293161	Medtr2g031590	0	#N/A	1.09164	0.000371482	2.03606	1.09036e-12	0.657957	0.041452	3	Putative tetrahydroberberine oxidase
MtrunA17_Chr4g0051421	#N/A	0	#N/A	1.66992	7.0032e-13	1.5458	1.4879e-11	0.713259	0.00430178	3	Putative tetrahydroberberine oxidase
MtrunA17_Chr2g0333081	Medtr2g103795	1.34859	0.000122707	1.7703	2.45846e-07	1.50329	1.17686e-05	0.750684	0.0342142	3	Putative tetratricopeptide-like helical domain superfamily
MtrunA17_Chr1g0180121	Medtr1g062590	0	#N/A	2.74462	6.45594e-05	3.27737	7.87655e-07	4.67505	4.80199e-11	3	Putative Thaumatin family	MtPR5	thaumatin-like protein (TC100682, SA-responsive)
MtrunA17_Chr5g0397831	Medtr5g010640	0	#N/A	2.15601	3.5155e-25	2.26842	3.63464e-28	1.0053	2.18454e-06	3	Putative Thaumatin family
MtrunA17_Chr8g0386351	#N/A	0	#N/A	2.5375	1.00978e-23	2.69501	7.17277e-27	1.34062	1.29866e-07	3	Putative Thaumatin family
MtrunA17_Chr5g0421011	Medtr5g048550	0	#N/A	1.48036	9.53508e-22	1.65415	3.66387e-27	0.908996	9.80727e-09	3	Putative thebaine 6-O-demethylase
MtrunA17_Chr5g0421041	Medtr5g048570	0.659455	0.0186708	1.30357	1.90921e-07	1.20775	5.19017e-07	1.31394	1.4772e-07	3	Putative thebaine 6-O-demethylase
MtrunA17_Chr6g0486221	Medtr0428s0030	0	#N/A	1.0608	4.69948e-07	2.10585	3.86066e-25	0.519052	0.0229146	3	Putative TIR domain, P-loop containing nucleoside triphosphate hydrolase
MtrunA17_Chr2g0302011	Medtr2g044830	1.01368	1.45351e-08	0.635499	0.000599272	1.16598	2.18503e-12	1.26186	1.31897e-13	3	Putative TIR domain, P-loop containing nucleoside triphosphate hydrolase
MtrunA17_Chr4g0005261	Medtr4g014160	0.726779	0.0270439	2.15353	6.26476e-16	2.62438	2.75266e-23	0.737216	0.00980915	3	Putative TIR domain, P-loop containing nucleoside triphosphate hydrolase
MtrunA17_Chr4g0005331	Medtr4g014280	0	#N/A	2.46633	2.50724e-08	2.99365	3.42679e-12	1.64263	0.000194591	3	Putative TIR domain, P-loop containing nucleoside triphosphate hydrolase
MtrunA17_Chr5g0443851	Medtr5g092310	0	#N/A	0.902478	0.00132703	2.10655	1.51986e-18	0.957987	0.000137447	3	Putative TIR domain, P-loop containing nucleoside triphosphate hydrolase
MtrunA17_Chr5g0443931	Medtr5g092410	1.09817	0.000311701	1.1149	0.000108547	2.20747	1.495e-16	1.27519	3.35816e-06	3	Putative TIR domain, P-loop containing nucleoside triphosphate hydrolase
MtrunA17_Chr8g0343631	Medtr8g020350	0	#N/A	2.62738	2.12708e-21	2.90624	1.08521e-26	1.56853	9.17522e-09	3	Putative TIR domain, P-loop containing nucleoside triphosphate hydrolase
MtrunA17_Chr5g0443781	Medtr5g092220	1.39935	0.000973226	0	#N/A	0	#N/A	0	#N/A	3	Putative TIR domain-containing protein
MtrunA17_Chr1g0184031	Medtr1g070015	0	#N/A	0.97262	4.4531e-05	1.63661	4.23713e-14	1.01117	8.77624e-06	3	Putative transcription factor AP2-EREBP family
MtrunA17_Chr1g0186741	Medtr1g074370	0	#N/A	1.74227	5.27174e-08	2.54674	4.85287e-16	0	#N/A	3	Putative transcription factor AP2-EREBP family	MtERF1	ethylene response factor 1 (TC105911, LjERF1-like)
MtrunA17_Chr1g0195151	Medtr1g087920	0	#N/A	0	#N/A	0.955474	0.00559969	1.67419	7.99913e-07	3	Putative transcription factor AP2-EREBP family
MtrunA17_Chr1g0201671	Medtr1g098460	0.402929	0.0119878	0.375539	0.0130629	0.896317	7.10634e-12	1.00217	8.49089e-14	3	Putative transcription factor AP2-EREBP family
MtrunA17_Chr3g0129421	Medtr3g095190	0	#N/A	0.692455	0.00594681	2.55692	1.26862e-29	0.525293	0.0404945	3	Putative transcription factor AP2-EREBP family
MtrunA17_Chr4g0017851	Medtr4g035430	1.77686	2.79265e-05	-1.01277	0.0214887	0	#N/A	-0.90851	0.0323505	3	Putative transcription factor AP2-EREBP family
MtrunA17_Chr6g0464581	Medtr6g037610	0	#N/A	1.84315	1.68906e-05	2.65203	1.29863e-10	1.34032	0.00242708	3	Putative transcription factor AP2-EREBP family
MtrunA17_Chr7g0261101	Medtr7g096700	0	#N/A	1.57043	0.0021086	2.77643	5.08957e-09	0	#N/A	3	Putative transcription factor AP2-EREBP family
MtrunA17_Chr7g0261201	Medtr7g096830	1.03366	0.0197619	1.86645	1.02607e-06	2.62601	1.27554e-12	0.883837	0.0301563	3	Putative transcription factor AP2-EREBP family
MtrunA17_Chr1g0183931	#N/A	0	#N/A	2.68065	8.55468e-16	3.10212	7.6585e-21	0.915787	0.00939512	3	Putative transcription factor AP2-EREBP family
MtrunA17_Chr1g0196871	#N/A	0	#N/A	0	#N/A	2.8837	1.83151e-14	0	#N/A	3	Putative transcription factor AP2-EREBP family
MtrunA17_Chr7g0215281	Medtr7g007010	0	#N/A	1.57616	0.000126456	1.73292	1.01612e-05	1.87818	2.74525e-06	3	Putative transcription factor AS2-LOB family
MtrunA17_Chr2g0299471	Medtr2g039620	1.21352	0.00712606	2.92245	3.26028e-14	2.93682	7.42806e-15	1.02054	0.0113449	3	Putative transcription factor bHLH family
MtrunA17_Chr2g0330641	Medtr2g100490	0	#N/A	1.62876	1.71808e-12	1.94727	6.30758e-18	1.00193	8.67391e-05	3	Putative transcription factor bHLH family
MtrunA17_Chr3g0141091	Medtr3g111290	0	#N/A	0	#N/A	0	#N/A	1.49709	1.62438e-05	3	Putative transcription factor bHLH family
MtrunA17_Chr7g0256671	Medtr7g090410	0	#N/A	0	#N/A	0	#N/A	1.25482	0.00577551	3	Putative transcription factor bHLH family
MtrunA17_Chr8g0351881	Medtr8g036235	0	#N/A	1.54744	5.30819e-07	3.03184	2.30872e-24	0.886598	0.00486368	3	Putative transcription factor bHLH family
MtrunA17_Chr1g0170571	#N/A	0	#N/A	0	#N/A	0	#N/A	1.97601	0.00313502	3	Putative transcription factor bHLH family
MtrunA17_Chr1g0168181	Medtr1g044225	0	#N/A	1.41455	5.57697e-08	1.69713	2.73663e-11	1.03178	0.000170895	3	Putative transcription factor C2H2 family
MtrunA17_Chr2g0327901	Medtr2g096540	0	#N/A	0	#N/A	1.03781	0.00403115	1.36839	0.000198947	3	Putative transcription factor C2H2 family
MtrunA17_Chr7g0222831	Medtr7g023560	0	#N/A	1.12666	5.2677e-09	1.72374	1.386e-20	0.798086	4.1599e-05	3	Putative transcription factor C2H2 family
MtrunA17_Chr7g0263131	Medtr7g100100	0	#N/A	2.04005	4.50647e-09	2.54323	5.16667e-14	0.766983	0.0441762	3	Putative transcription factor C2H2 family
MtrunA17_Chr7g0264931	Medtr7g102990	0	#N/A	0.562202	0.00928985	0.60655	0.00252523	1.0163	1.91826e-07	3	Putative transcription factor C2H2 family
MtrunA17_Chr7g0276591	Medtr7g117540	0	#N/A	2.69686	6.14826e-23	2.70318	1.04156e-23	1.14819	3.72882e-05	3	Putative transcription factor C2H2 family
MtrunA17_Chr8g0348551	Medtr8g028815	0.651354	0.000401377	0	#N/A	1.04781	3.69552e-11	0.674516	6.40719e-05	3	Putative transcription factor C2H2 family
MtrunA17_Chr8g0352701	Medtr8g038370	0	#N/A	1.51137	4.61108e-12	1.79387	4.42186e-17	0.79243	0.000540582	3	Putative transcription factor C2H2 family
MtrunA17_Chr8g0345401	#N/A	0.727769	0.000264301	1.34403	2.61486e-14	1.61752	3.74839e-21	0.460946	0.0181823	3	Putative transcription factor C2H2 family
MtrunA17_Chr3g0113651	Medtr3g070880	1.0036	0.00859808	2.78651	6.06566e-18	3.04774	1.55035e-21	0.943835	0.00534895	3	Putative transcription factor C3H family
MtrunA17_Chr5g0430211	Medtr5g071070	0	#N/A	1.3065	3.58681e-14	1.82276	9.31555e-27	0.922926	1.76901e-07	3	Putative transcription factor C3H family
MtrunA17_Chr8g0352251	Medtr8g037270	1.01038	8.56051e-07	0	#N/A	0	#N/A	0	#N/A	3	Putative transcription factor Hap2/NF-YA family	MtNF-YA7	nuclear factor Y subunit A7
MtrunA17_Chr6g0453021	Medtr6g011610	0	#N/A	-0.718728	5.42959e-07	-0.805191	5.73672e-09	-1.04068	1.61561e-13	3	Putative transcription factor Homobox-WOX family
MtrunA17_Chr1g0179311	Medtr1g061170	0	#N/A	0	#N/A	2.37432	7.38014e-15	0.717367	0.0342865	3	Putative transcription factor HSF-type-DNA-binding family
MtrunA17_Chr8g0353411	#N/A	0	#N/A	0	#N/A	0	#N/A	1.13861	2.4052e-10	3	Putative transcription factor interactor and regulator CCHC(Zn) family
MtrunA17_Chr1g0209071	Medtr1g109350	0	#N/A	0	#N/A	1.07894	0.000156059	1.49914	6.6926e-08	3	Putative transcription factor interactor and regulator Znf-B family
MtrunA17_Chr1g0167691	Medtr1g043080	0	#N/A	2.13043	1.7024e-18	2.07129	4.32805e-18	0.721326	0.00593519	3	Putative transcription factor MYB-HB-like family	MtMYB009	Myeloblastosis (MYB) transcription factor 9
MtrunA17_Chr3g0135311	Medtr3g103570	1.6364	6.15619e-20	0.841251	9.2679e-06	1.09981	3.08151e-10	0.699026	0.000136906	3	Putative transcription factor MYB-HB-like family	MtMYB067	Myeloblastosis (MYB) transcription factor 67
MtrunA17_Chr4g0024181	Medtr4g046737	1.21848	0.0095322	2.46934	6.87626e-10	2.23228	1.32486e-08	0	#N/A	3	Putative transcription factor MYB-HB-like family
MtrunA17_Chr7g0274581	Medtr7g115650	0	#N/A	1.98211	2.32827e-11	1.87163	5.34525e-11	1.0717	0.00051363	3	Putative transcription factor MYB-HB-like family	MtMYB012	Myeloblastosis (MYB) transcription factor 12
MtrunA17_Chr1g0147421	Medtr1g008740	3.8557	4.14204e-07	0.749557	0.00467906	0.644831	0.00547744	0	#N/A	3	Putative transcription factor NAM family
MtrunA17_Chr5g0417791	Medtr5g041940	0	#N/A	1.51442	1.55757e-16	2.02836	7.93958e-29	1.30023	2.56413e-12	3	Putative transcription factor NAM family
MtrunA17_Chr5g0442771	Medtr5g090970	0	#N/A	2.26156	7.66354e-30	2.33512	2.50481e-32	1.31119	5.37278e-11	3	Putative transcription factor NAM family
MtrunA17_Chr6g0454781	Medtr6g015350	1.24916	2.52141e-07	0	#N/A	0	#N/A	0	#N/A	3	Putative transcription factor TCP family	MtTCP17	TEOSINTE BRANCHED1 (TB1), CYCLOIDEA (CYC), PROLIFERATING CELL FACTORS 1&2 (PCF1 & 2) family
MtrunA17_Chr8g0384821	Medtr8g094690	0	#N/A	0	#N/A	1.39056	0.000614945	1.2527	0.00283734	3	Putative transcription factor TGA like domain-containing protein
MtrunA17_Chr4g0070271	Medtr4g124960	0	#N/A	1.27645	0.0139384	3.12683	2.68102e-11	0	#N/A	3	Putative transcription factor TIFY family
MtrunA17_Chr1g0179561	Medtr1g061640	0	#N/A	0	#N/A	0	#N/A	2.35861	1.39833e-05	3	Putative transcription factor Trihelix family	MtGT-4	trihelix transcription factor (GT) 4
MtrunA17_Chr2g0331961	Medtr2g102267	0	#N/A	0	#N/A	2.42961	1.38897e-07	2.22262	2.5395e-06	3	Putative transcription factor WD40-like family
MtrunA17_Chr3g0115611	Medtr3g074070	0	#N/A	0	#N/A	1.85743	1.11138e-22	1.07137	4.72381e-08	3	Putative transcription factor WD40-like family
MtrunA17_Chr2g0333851	Medtr2g105060	0	#N/A	2.00944	3.33319e-07	2.92382	4.05983e-14	0	#N/A	3	Putative transcription factor WRKY family
MtrunA17_Chr3g0126391	Medtr3g090860	0	#N/A	2.31776	3.65373e-10	2.73368	8.66726e-15	0.854925	0.0275812	3	Putative transcription factor WRKY family
MtrunA17_Chr3g0136961	Medtr3g106060	0	#N/A	1.00153	0.0416675	2.88465	2.42325e-11	1.52829	0.000658816	3	Putative transcription factor WRKY family
MtrunA17_Chr4g0060271	Medtr4g107970	0.526156	0.0143638	1.66876	3.0351e-21	1.95075	6.16621e-29	0.930869	2.35753e-07	3	Putative transcription factor WRKY family
MtrunA17_Chr7g0243891	Medtr7g071120	0	#N/A	1.72498	6.35209e-19	2.02619	7.18437e-26	0.902828	6.8039e-06	3	Putative transcription factor WRKY family
MtrunA17_Chr7g0275531	Medtr7g117200	0	#N/A	1.68323	4.9505e-08	2.24066	2.52689e-14	0.975794	0.0016403	3	Putative transcription factor WRKY family
MtrunA17_Chr8g0386241	Medtr8g096730	0	#N/A	1.49391	4.97828e-05	2.24786	1.19375e-10	1.55081	1.80798e-05	3	Putative transcription factor WRKY family
MtrunA17_Chr8g0387981	Medtr8g099350	0	#N/A	1.61856	5.19203e-09	2.09806	6.19059e-15	0.90539	0.00169371	3	Putative transcription factor WRKY family
MtrunA17_Chr5g0427961	Medtr5g066990	0	#N/A	0	#N/A	0	#N/A	1.25114	2.86498e-07	3	Putative transcription factor, K-box
MtrunA17_Chr7g0221091	#N/A	0	#N/A	1.79815	3.63343e-10	2.2366	4.70213e-16	1.14417	6.13259e-05	3	Putative transcription factor/ chromatin remodeling BED-type(Zn) family
MtrunA17_Chr5g0394621	Medtr5g006450	0.916073	0.0224039	2.58305	1.01513e-14	2.90403	1.7197e-18	1.11866	0.00126009	3	Putative transcription regulator GNAT family
MtrunA17_Chr5g0394631	#N/A	0	#N/A	1.8881	3.93471e-07	2.44184	1.41538e-11	0.803222	0.0485267	3	Putative transcription regulator GNAT family
MtrunA17_Chr2g0314871	Medtr2g073600	1.16406	0.00244314	0	#N/A	0	#N/A	0.753581	0.0153322	3	Putative transferase, protein kinase RLK-Pelle-DLSV family
MtrunA17_Chr8g0340881	Medtr8g014700	1.32519	0.000255782	1.20587	0.000155303	1.58363	2.58442e-08	1.07987	0.000243947	3	Putative transferase, protein kinase RLK-Pelle-LRR-I-1 family
MtrunA17_Chr4g0061201	Medtr4g109170	0	#N/A	1.87417	7.38391e-16	2.35474	1.58115e-24	0.896778	0.000216255	3	Putative transferase, protein kinase RLK-Pelle-LRR-Xb-2 family
MtrunA17_Chr8g0382021	Medtr8g090095	1.02021	1.98228e-07	0.602758	0.00244579	0	#N/A	0.680346	0.000332128	3	Putative trans-zeatin O-beta-D-glucosyltransferase
MtrunA17_Chr1g0153271	Medtr1g019270	0	#N/A	0.996682	8.14253e-07	1.70146	1.22251e-18	0.841924	3.71732e-05	3	Putative triacylglycerol lipase
MtrunA17_Chr5g0434621	Medtr5g078210	1.70339	0.00154156	0	#N/A	0	#N/A	0	#N/A	3	Putative triacylglycerol lipase
MtrunA17_Chr4g0032171	#N/A	0	#N/A	1.87889	8.55649e-08	2.3685	3.36603e-12	1.34821	0.000146625	3	Putative tropinone reductase I
MtrunA17_Chr6g0452091	Medtr6g009090	1.03032	9.63189e-05	0	#N/A	0	#N/A	0	#N/A	3	Putative Type I protein exporter
MtrunA17_Chr1g0177261	Medtr1g056840	0	#N/A	0	#N/A	2.12676	2.28269e-19	0.882888	0.000430477	3	Putative U box domain, armadillo-like helical, Zinc finger, RING/FYVE/PHD-type	MtPUB2	Plant U-box protein 2 (different from MtPUB2 PMID: 29440269)
MtrunA17_Chr1g0177271	Medtr1g056870	0	#N/A	0	#N/A	2.56351	2.38243e-21	1.27416	4.28517e-06	3	Putative U box domain, armadillo-like helical, Zinc finger, RING/FYVE/PHD-type	MtPUB3	Plant U-box protein 3
MtrunA17_Chr1g0177281	Medtr1g056880	0	#N/A	0	#N/A	2.15606	8.37427e-15	0.881417	0.00307299	3	Putative U box domain, armadillo-like helical, Zinc finger, RING/FYVE/PHD-type	MtPUB4	Plant U-box protein 4
MtrunA17_Chr1g0177301	Medtr1g056910	0	#N/A	2.34614	1.83492e-16	2.95303	1.81379e-25	1.71135	2.0226e-09	3	Putative U box domain, armadillo-like helical, Zinc finger, RING/FYVE/PHD-type	MtPUB5	Plant U-box protein 5
MtrunA17_Chr3g0110121	Medtr3g065080	0	#N/A	1.84003	3.66671e-13	2.5427	4.05666e-24	0.663552	0.0168607	3	Putative U box domain, armadillo-like helical, Zinc finger, RING/FYVE/PHD-type	MtPUB22	Plant U-box protein 22
MtrunA17_Chr5g0434171	Medtr5g077510	0	#N/A	1.79764	7.62062e-16	2.76803	1.0173e-34	1.01092	1.08933e-05	3	Putative U box domain, armadillo-like helical, Zinc finger, RING/FYVE/PHD-type	MtPUB44	Plant U-box protein 44
MtrunA17_Chr7g0267501	Medtr7g106340	0	#N/A	1.54095	7.27019e-09	2.62135	2.28515e-23	1.04473	0.000137447	3	Putative U box domain, armadillo-like helical, Zinc finger, RING/FYVE/PHD-type	MtPUB55	Plant U-box protein 55
MtrunA17_Chr5g0396571	Medtr5g009160	0	#N/A	1.21965	9.6695e-08	1.98324	2.51947e-19	1.20972	3.39337e-07	3	Putative UDP-glucose 4-epimerase
MtrunA17_Chr7g0265111	Medtr7g102520	0	#N/A	0	#N/A	0.862143	0.00423853	1.28972	8.83606e-06	3	Putative UDP-glucuronosyl/UDP-glucosyltransferase
MtrunA17_Chr1g0207971	Medtr1g107375	0	#N/A	1.40725	4.5634e-10	1.6734	1.2351e-14	0.621882	0.0110792	3	Putative UDP-glucuronosyl/UDP-glucosyltransferase, UDP-glycosyltransferase family
MtrunA17_Chr6g0463861	Medtr6g035265	0	#N/A	0	#N/A	0	#N/A	1.01603	0.00137469	3	Putative UDP-glucuronosyl/UDP-glucosyltransferase, UDP-glycosyltransferase family
MtrunA17_Chr8g0350881	Medtr8g032950	0	#N/A	0	#N/A	0	#N/A	1.50147	2.65837e-05	3	Putative UDP-glucuronosyl/UDP-glucosyltransferase, UDP-glycosyltransferase family
MtrunA17_Chr1g0192651	Medtr1g083950	0	#N/A	0.921308	0.00450935	1.38119	3.11299e-06	2.50785	1.83566e-16	3	Putative universal stress protein A family
MtrunA17_Chr1g0195661	Medtr1g088640	0	#N/A	0	#N/A	0.908661	0.00215758	2.18812	8.09166e-14	3	Putative universal stress protein A family
MtrunA17_Chr5g0438681	Medtr5g084850	1.40755	0.00478741	0	#N/A	0	#N/A	0	#N/A	3	Putative vinorine synthase
MtrunA17_Chr3g0081361	Medtr3g012250	0.569976	0.0366955	1.31401	5.4461e-10	1.61904	2.09358e-15	0.647935	0.00361264	3	Putative virus X resistance protein-like, coiled-coil
MtrunA17_Chr4g0054231	Medtr4g097280	0	#N/A	2.80902	5.019e-14	3.20423	5.84414e-18	0	#N/A	3	Putative VQ motif-containing protein
MtrunA17_Chr2g0297061	Medtr2g035850	0	#N/A	1.43464	1.15542e-18	1.8222	1.4493e-29	0.711187	2.90928e-05	3	Putative VQ motif-containing protein 15/22
MtrunA17_Chr4g0072671	Medtr4g128580	0	#N/A	0	#N/A	2.92445	6.12619e-15	0	#N/A	3	Putative xyloglucan:xyloglucosyl transferase
MtrunA17_Chr2g0301141	Medtr2g042970	0	#N/A	0	#N/A	0	#N/A	1.21444	1.85545e-05	3	Putative Zf-FLZ domain-containing protein
MtrunA17_Chr4g0043491	Medtr4g083570	0	#N/A	0	#N/A	1.56333	9.88259e-07	1.54607	2.281e-06	3	Putative zinc/iron permease	MtZIP6	Zinc-Iron Permease 6
MtrunA17_Chr7g0220621	Medtr7g017820	0	#N/A	0	#N/A	1.60665	1.78873e-08	2.4923	7.41032e-18	3	#N/A
MtrunA17_Chr7g0273501	Medtr7g114200	1.33748	8.85402e-12	0	#N/A	0	#N/A	0	#N/A	3	#N/A
MtrunA17_Chr4g0063721	#N/A	0	#N/A	0	#N/A	1.55273	9.68768e-06	1.49549	2.6475e-05	3	#N/A
MtrunA17_Chr7g0250571	#N/A	0	#N/A	0	#N/A	0	#N/A	1.94754	1.67998e-05	3	#N/A
MtrunA17_Chr3g0083361	#N/A	1.72612	0.000471411	0	#N/A	0	#N/A	0	#N/A	3	#N/A
MtrunA17_Chr3g0083401	#N/A	2.83897	0.00348255	2.12934	0.0215638	0	#N/A	1.95698	0.0299264	3	#N/A
MtrunA17_Chr1g0149821	Medtr1g013150	0	#N/A	1.01637	3.00757e-10	0.917268	7.75687e-09	0	#N/A	4	Class V chitinase CHIT5a	MtCHIT5a	chitinase 5 a
MtrunA17_Chr2g0295001	Medtr2g035100	0	#N/A	0.977535	8.83637e-10	1.25027	7.25966e-16	1.18208	1.55362e-13	4	Class-10 pathogenesis-related protein 1	MtPR10-1	Pathogenesis-related protein 10-1 (Y08641.1 GENBANK)
MtrunA17_Chr2g0295021	Medtr2g035105	0	#N/A	0.855937	5.49804e-09	1.15826	3.19717e-16	0.856579	6.06274e-09	4	Class-10 pathogenesis-related protein 1	MtPR10-2	Pathogenesis-related protein 10 (TC76513, TC131880)
MtrunA17_Chr1g0151071	Medtr1g015650	0	#N/A	0	#N/A	1.32231	9.59655e-06	0	#N/A	4	hypothetical protein
MtrunA17_Chr1g0155341	Medtr1g022395	0	#N/A	0.634737	0.034582	1.33658	2.72819e-07	0.721226	0.0110305	4	hypothetical protein
MtrunA17_Chr1g0177521	Medtr1g057290	0	#N/A	1.07053	2.04914e-06	1.99609	1.86494e-20	0	#N/A	4	hypothetical protein
MtrunA17_Chr1g0186401	Medtr1g073770	0	#N/A	0	#N/A	1.3832	7.03409e-09	0	#N/A	4	hypothetical protein	MtIDA29	Inflorescence Deficient in Abscission
MtrunA17_Chr1g0192611	Medtr1g083900	0	#N/A	1.18008	0.000208517	0	#N/A	0	#N/A	4	hypothetical protein
MtrunA17_Chr1g0208421	Medtr1g108330	0	#N/A	1.04828	0.0206532	1.60137	8.51263e-05	0	#N/A	4	hypothetical protein
MtrunA17_Chr1g0209701	Medtr1g110550	0	#N/A	0	#N/A	1.54607	3.55637e-09	0.659481	0.0273927	4	hypothetical protein
MtrunA17_Chr1g0198091	Medtr1g492660	0.453054	0.0225875	0.782428	3.2753e-06	1.1253	1.00409e-12	0.387865	0.0311965	4	hypothetical protein
MtrunA17_Chr2g0285541	Medtr2g018780	0	#N/A	0	#N/A	1.37047	1.95978e-09	0	#N/A	4	hypothetical protein
MtrunA17_Chr2g0294521	Medtr2g034350	0	#N/A	0	#N/A	1.17925	5.27305e-05	0	#N/A	4	hypothetical protein
MtrunA17_Chr2g0294531	Medtr2g034360	0	#N/A	0	#N/A	1.05084	0.00166125	0.771113	0.0308208	4	hypothetical protein
MtrunA17_Chr2g0299641	Medtr2g039910	0	#N/A	1.26468	1.59137e-09	1.66273	3.34561e-16	0	#N/A	4	hypothetical protein
MtrunA17_Chr2g0308961	Medtr2g061780	0	#N/A	1.10776	2.35641e-06	1.72605	1.26452e-14	0	#N/A	4	hypothetical protein
MtrunA17_Chr2g0315331	Medtr2g075600	0	#N/A	0.926197	0.00602298	1.65921	3.76346e-09	0.647381	0.0450899	4	hypothetical protein
MtrunA17_Chr2g0318121	Medtr2g080030	0.596825	0.00793398	0	#N/A	1.17145	1.96945e-10	0	#N/A	4	hypothetical protein
MtrunA17_Chr2g0321761	Medtr2g086870	0	#N/A	0	#N/A	1.22172	1.43865e-10	0	#N/A	4	hypothetical protein
MtrunA17_Chr3g0082181	Medtr3g014180	0	#N/A	0	#N/A	1.3839	2.45016e-08	0	#N/A	4	hypothetical protein
MtrunA17_Chr3g0087981	Medtr3g028450	0	#N/A	0	#N/A	1.27786	6.9224e-06	0	#N/A	4	hypothetical protein
MtrunA17_Chr3g0088001	Medtr3g028460	0	#N/A	0	#N/A	1.24993	1.30295e-06	0	#N/A	4	hypothetical protein
MtrunA17_Chr3g0088011	Medtr3g028465	0	#N/A	0	#N/A	1.76401	4.16922e-12	0	#N/A	4	hypothetical protein
MtrunA17_Chr3g0098851	Medtr3g051570	0	#N/A	0.866137	0.0257495	1.57646	4.37161e-06	0	#N/A	4	hypothetical protein
MtrunA17_Chr3g0098881	Medtr3g051610	0	#N/A	1.14681	1.09344e-12	1.18109	4.72909e-14	0.401585	0.0250756	4	hypothetical protein
MtrunA17_Chr3g0109691	Medtr3g064350	0	#N/A	0	#N/A	1.12235	0.00245752	0	#N/A	4	hypothetical protein
MtrunA17_Chr3g0113341	Medtr3g070400	0	#N/A	0.87833	1.58471e-10	1.24716	7.25442e-21	0.402196	0.00691528	4	hypothetical protein
MtrunA17_Chr3g0115951	Medtr3g074830	1.39318	2.99981e-06	0	#N/A	1.08546	9.78965e-05	0	#N/A	4	hypothetical protein
MtrunA17_Chr3g0118051	Medtr3g078420	0	#N/A	0	#N/A	1.40687	2.62704e-14	0	#N/A	4	hypothetical protein
MtrunA17_Chr3g0120541	Medtr3g082250	0	#N/A	1.01533	0.0415305	1.22739	0.00589462	0	#N/A	4	hypothetical protein
MtrunA17_Chr3g0122261	Medtr3g084990	0.543722	0.0161948	0	#N/A	1.04421	1.99573e-08	0	#N/A	4	hypothetical protein
MtrunA17_Chr3g0123721	Medtr3g086830	0	#N/A	0.734462	5.97228e-06	1.10846	4.48178e-13	0	#N/A	4	hypothetical protein
MtrunA17_Chr3g0134881	Medtr3g103190	0	#N/A	0.545782	0.00211486	1.33351	3.78486e-17	0.448678	0.011669	4	hypothetical protein
MtrunA17_Chr3g0136001	Medtr3g104750	0	#N/A	0	#N/A	1.28409	6.38386e-05	0	#N/A	4	hypothetical protein
MtrunA17_Chr3g0137731	Medtr3g107090	0	#N/A	0	#N/A	1.49899	2.58033e-12	0	#N/A	4	hypothetical protein
MtrunA17_Chr3g0143811	Medtr3g115210	1.10256	4.22735e-06	0	#N/A	0.518144	0.0292061	0	#N/A	4	hypothetical protein
MtrunA17_Chr4g0002831	Medtr4g009510	1.0292	0.000118583	0	#N/A	0.851991	0.000207798	0	#N/A	4	hypothetical protein
MtrunA17_Chr4g0004441	Medtr4g012460	1.1904	0.00138767	0	#N/A	1.30262	7.64365e-05	0	#N/A	4	hypothetical protein
MtrunA17_Chr4g0004371	Medtr4g012490	0.718944	0.0415478	1.00733	0.000855428	1.04142	0.000236353	0	#N/A	4	hypothetical protein
MtrunA17_Chr4g0012571	Medtr4g027195	0	#N/A	1.37274	2.08045e-06	1.41148	5.14933e-08	0.763526	0.00702594	4	hypothetical protein
MtrunA17_Chr4g0019051	Medtr4g037055	0	#N/A	0.419164	0.00608309	1.3437	7.48958e-25	0.766662	1.46475e-08	4	hypothetical protein	MtPEP	Plant Elicitor Peptide
MtrunA17_Chr4g0019521	Medtr4g039540	0	#N/A	0.948277	0.00536947	1.18749	0.00016534	0	#N/A	4	hypothetical protein
MtrunA17_Chr4g0025731	Medtr4g051682	0	#N/A	1.56438	3.88433e-06	1.34929	1.03755e-05	0	#N/A	4	hypothetical protein
MtrunA17_Chr4g0042811	Medtr4g082550	0	#N/A	0.747381	2.14439e-06	1.32699	6.32625e-19	1.04213	1.20905e-11	4	hypothetical protein
MtrunA17_Chr4g0048011	Medtr4g090545	0	#N/A	0.856525	0.000351099	1.55926	1.63239e-12	0	#N/A	4	hypothetical protein
MtrunA17_Chr4g0048291	Medtr4g091100	0	#N/A	0	#N/A	2.04821	1.6606e-14	0	#N/A	4	hypothetical protein
MtrunA17_Chr4g0056221	Medtr4g101010	1.2819	0.000456691	1.89812	6.93071e-09	1.11434	0.000445682	0	#N/A	4	hypothetical protein
MtrunA17_Chr4g0059251	Medtr4g106650	0	#N/A	0	#N/A	1.30569	6.77581e-08	0	#N/A	4	hypothetical protein
MtrunA17_Chr4g0063161	Medtr4g113600	0	#N/A	0	#N/A	1.22844	7.5705e-08	0	#N/A	4	hypothetical protein
MtrunA17_Chr4g0065281	Medtr4g116610	0	#N/A	1.04164	0.000562096	1.12646	7.27015e-05	0	#N/A	4	hypothetical protein
MtrunA17_Chr5g0399521	Medtr5g013030	0	#N/A	1.16505	0.000202878	1.26457	2.11503e-05	0.665495	0.044201	4	hypothetical protein
MtrunA17_Chr5g0408951	Medtr5g026380	0	#N/A	0.817496	0.000235392	1.45596	1.18128e-12	0	#N/A	4	hypothetical protein
MtrunA17_Chr5g0431791	Medtr5g073590	0	#N/A	1.3186	7.31021e-10	1.72657	1.12434e-16	0	#N/A	4	hypothetical protein
MtrunA17_Chr5g0434351	Medtr5g077760	0	#N/A	1.16102	0.0137036	1.38141	0.00131503	1.26243	0.00643145	4	hypothetical protein
MtrunA17_Chr6g0455241	Medtr6g015770	0	#N/A	1.25961	6.21031e-07	1.38634	8.40266e-09	0	#N/A	4	hypothetical protein
MtrunA17_Chr6g0458171	Medtr6g021900	0	#N/A	0	#N/A	1.55264	5.38779e-05	0	#N/A	4	hypothetical protein
MtrunA17_Chr6g0463501	Medtr6g034920	0	#N/A	0.936759	5.10905e-12	1.40071	5.16317e-26	0.739055	9.72316e-08	4	hypothetical protein
MtrunA17_Chr6g0480131	Medtr6g074160	0	#N/A	0	#N/A	1.66948	1.07444e-11	0	#N/A	4	hypothetical protein
MtrunA17_Chr7g0223451	Medtr7g024990	0	#N/A	0	#N/A	1.18551	4.49463e-06	0	#N/A	4	hypothetical protein
MtrunA17_Chr4g0018981	Medtr7g028468	0	#N/A	0	#N/A	1.03949	4.39078e-16	0.507863	0.000230043	4	hypothetical protein
MtrunA17_Chr7g0231621	Medtr7g039540	0	#N/A	0.976587	3.80728e-06	0.981297	1.6136e-06	1.32637	1.39577e-10	4	hypothetical protein
MtrunA17_Chr7g0242161	Medtr7g068110	0	#N/A	0.587217	6.67681e-05	1.14738	2.13638e-17	0.581975	5.50604e-05	4	hypothetical protein
MtrunA17_Chr7g0251401	Medtr7g082920	0.53557	0.0195672	0.744323	0.00016848	1.14689	3.03468e-10	1.12858	1.35099e-09	4	hypothetical protein
MtrunA17_Chr7g0270921	Medtr7g110880	0	#N/A	0	#N/A	1.23355	4.9323e-07	-0.592503	0.0319295	4	hypothetical protein
MtrunA17_Chr8g0337681	Medtr8g010200	0	#N/A	1.7416	3.25155e-11	2.20019	1.20603e-17	0	#N/A	4	hypothetical protein
MtrunA17_Chr8g0367871	Medtr8g069315	0	#N/A	1.0065	1.13976e-07	1.75816	6.44372e-22	0	#N/A	4	hypothetical protein
MtrunA17_Chr8g0372691	Medtr8g076910	0	#N/A	0	#N/A	1.013	3.72824e-06	0.527825	0.0260702	4	hypothetical protein
MtrunA17_Chr8g0381901	Medtr8g090020	0	#N/A	0.662998	0.0172507	1.13205	4.13352e-06	1.3488	6.05533e-08	4	hypothetical protein
MtrunA17_Chr8g0385431	Medtr8g095560	0	#N/A	0.95163	2.89629e-08	1.16187	1.51951e-12	0.801473	2.92633e-06	4	hypothetical protein
MtrunA17_Chr8g0339321	#N/A	0	#N/A	1.19525	4.52819e-07	1.47532	9.30171e-12	0.523706	0.0257531	4	hypothetical protein
MtrunA17_Chr4g0066501	#N/A	0	#N/A	0.536312	4.09311e-07	1.01968	1.898e-24	0.408176	0.000162506	4	hypothetical protein
MtrunA17_Chr1g0200711	#N/A	0	#N/A	0.589147	0.0402642	1.28324	1.7607e-07	0.641403	0.0173487	4	hypothetical protein
MtrunA17_Chr8g0346281	#N/A	0	#N/A	0.69833	0.0230862	1.01229	0.000148467	1.01602	0.000190908	4	hypothetical protein
MtrunA17_Chr8g0381771	#N/A	0	#N/A	1.29709	3.20135e-10	1.37384	5.21218e-12	0.904681	1.41194e-05	4	hypothetical protein
MtrunA17_Chr4g0062481	#N/A	0	#N/A	1.15333	2.26861e-07	1.1618	8.11388e-08	1.35909	7.71454e-10	4	hypothetical protein
MtrunA17_Chr1g0175471	#N/A	0.685105	0.00380569	0.724168	0.000939642	1.54061	9.30484e-15	0.826782	8.60058e-05	4	hypothetical protein
MtrunA17_Chr5g0443571	#N/A	0	#N/A	0.468518	0.00966464	1.00202	1.71311e-10	0	#N/A	4	hypothetical protein
MtrunA17_Chr7g0239271	#N/A	0	#N/A	0.806541	0.0185531	1.62429	8.08148e-09	0	#N/A	4	hypothetical protein
MtrunA17_Chr7g0240941	#N/A	0	#N/A	0.871479	1.7948e-08	1.03651	1.12275e-12	0	#N/A	4	hypothetical protein
MtrunA17_Chr4g0024671	#N/A	0	#N/A	1.45817	8.4892e-06	1.21279	0.000144141	0	#N/A	4	hypothetical protein
MtrunA17_Chr1g0164491	#N/A	0	#N/A	0	#N/A	1.219	1.92337e-06	0	#N/A	4	hypothetical protein
MtrunA17_Chr5g0397871	#N/A	0	#N/A	0	#N/A	1.06483	7.49818e-06	0	#N/A	4	hypothetical protein
MtrunA17_Chr1g0176491	#N/A	0	#N/A	0	#N/A	1.40826	1.28104e-05	0	#N/A	4	hypothetical protein
MtrunA17_Chr8g0358611	#N/A	0	#N/A	0	#N/A	1.39508	1.22845e-12	0	#N/A	4	hypothetical protein
MtrunA17_Chr2g0299751	#N/A	0	#N/A	0	#N/A	1.42516	3.29201e-07	0	#N/A	4	hypothetical protein
MtrunA17_Chr8g0374431	#N/A	0	#N/A	0	#N/A	1.59787	2.27468e-12	0	#N/A	4	hypothetical protein
MtrunA17_Chr8g0358571	#N/A	0	#N/A	0	#N/A	1.19431	2.51571e-11	0.442071	0.0301563	4	hypothetical protein
MtrunA17_Chr8g0358621	#N/A	0	#N/A	0	#N/A	1.79949	1.03041e-19	0	#N/A	4	hypothetical protein
MtrunA17_Chr8g0374441	#N/A	0	#N/A	0	#N/A	1.98636	4.96895e-16	0	#N/A	4	hypothetical protein
MtrunA17_Chr2g0313951	#N/A	1.83772	1.98218e-08	0	#N/A	1.11146	0.000328068	0	#N/A	4	hypothetical protein
MtrunA17_Chr7g0256681	#N/A	1.06546	3.75913e-05	0.612437	0.0201857	1.25402	3.86128e-08	0	#N/A	4	hypothetical protein
MtrunA17_Chr1g0184051	#N/A	1.16481	3.11699e-05	0.658025	0.0217152	0.819428	0.0013293	0	#N/A	4	hypothetical protein
MtrunA17_Chr4g0025971	#N/A	0	#N/A	0.952714	1.4879e-05	1.32299	2.12221e-10	0	#N/A	4	Putative (+)-borneol dehydrogenase
MtrunA17_Chr3g0143561	Medtr3g114910	0.549035	0.020556	1.03303	2.36097e-07	1.52544	9.10729e-16	0.864517	1.21069e-05	4	Putative [Histone H3]-lysine(4) N-trimethyltransferase transcription factor C2H2 family
MtrunA17_Chr4g0034121	Medtr4g068457	0	#N/A	0	#N/A	1.13331	0.00231909	0	#N/A	4	Putative [Myosin heavy-chain] kinase transcription factor WD40-like family
MtrunA17_Chr5g0410641	Medtr5g029190	-0.507012	0.0179638	0	#N/A	1.0935	2.62998e-10	0	#N/A	4	Putative 1,4-beta-D-xylan synthase
MtrunA17_Chr5g0394841	Medtr5g006750	0	#N/A	1.17852	2.72399e-14	1.30863	8.41617e-18	0.638839	8.55889e-05	4	Putative 12-oxophytodienoate reductase
MtrunA17_Chr5g0394861	Medtr5g006780	0	#N/A	1.18602	1.80548e-12	1.08625	6.1332e-11	0.405138	0.0329615	4	Putative 12-oxophytodienoate reductase	MtOPR	12-OPDA reductase (TC94406)
MtrunA17_Chr8g0387481	Medtr8g098930	0	#N/A	0.903056	8.30453e-14	1.07315	1.39193e-19	0	#N/A	4	Putative 1-aminocyclopropane-1-carboxylate synthase
MtrunA17_Chr4g0055371	Medtr4g099180	0	#N/A	0	#N/A	1.14405	2.87226e-06	0	#N/A	4	Putative 1-phosphatidylinositol-4-phosphate 5-kinase
MtrunA17_Chr1g0209741	Medtr1g110670	0	#N/A	0.678273	0.00105476	1.78678	8.05938e-22	0.547877	0.0081939	4	Putative 2-acylglycerol O-acyltransferase
MtrunA17_Chr1g0205871	Medtr1g105020	0	#N/A	1.34107	1.23889e-09	1.54059	8.66493e-13	0.739672	0.00148387	4	Putative 2-hydroxyisoflavanone dehydratase, Carboxylesterase
MtrunA17_Chr1g0189081	Medtr1g077930	1.08594	0.00352739	0.900919	0.00308997	0.879995	0.00208401	0	#N/A	4	Putative 2-hydroxymuconate-6-semialdehyde hydrolase
MtrunA17_Chr2g0279401	Medtr2g009270	0	#N/A	0.611293	0.014398	1.06659	1.38812e-06	1.21757	5.77863e-08	4	Putative 3,4-dihydroxy-2-butanone-4-phosphate synthase, GTP cyclohydrolase II
MtrunA17_Chr1g0174471	#N/A	0	#N/A	1.0025	1.13216e-07	1.01354	2.55612e-08	0.739495	9.67286e-05	4	Putative 3,9-dihydroxypterocarpan 6A-monooxygenase
MtrunA17_Chr5g0411071	Medtr5g029990	0	#N/A	0.710449	2.5903e-07	1.13604	5.40666e-18	0.416189	0.00455815	4	Putative 3-beta hydroxysteroid dehydrogenase/isomerase, NAD(P)-binding domain superfamily
MtrunA17_Chr7g0227901	#N/A	0	#N/A	1.11823	0.000718803	1.31513	1.25055e-05	1.21376	5.24249e-05	4	Putative 3-dehydrosphinganine reductase
MtrunA17_Chr2g0292541	Medtr2g030400	1.04278	1.88286e-11	0	#N/A	0.416866	0.00957199	0	#N/A	4	Putative 3-hydroxyisobutyrate dehydrogenase
MtrunA17_Chr5g0442841	Medtr5g091060	0.597419	0.00132564	0	#N/A	1.06784	2.04949e-11	0	#N/A	4	Putative 4-hydroxyphenylpyruvate dioxygenase
MtrunA17_Chr8g0351581	Medtr8g036020	0	#N/A	1.14559	7.73397e-19	0.99545	8.03321e-15	0.424683	0.00272014	4	Putative 4-hydroxy-tetrahydrodipicolinate synthase
MtrunA17_Chr6g0481341	Medtr6g478090	0	#N/A	0.904498	2.05254e-05	1.40327	3.68723e-13	0.798035	9.22183e-05	4	Putative 50S ribosomal protein L30e
MtrunA17_Chr6g0454331	Medtr6g014270	0	#N/A	1.10592	6.9782e-06	1.10857	3.23397e-06	0	#N/A	4	Putative 7-deoxyloganetin glucosyltransferase
MtrunA17_Chr3g0127381	Medtr3g092060	0	#N/A	0.905981	6.18863e-07	1.77025	1.4872e-24	0.441354	0.0255081	4	Putative AAA+ ATPase domain, ATPase, AAA-type, core, AAA-type ATPase domain-containing protein
MtrunA17_Chr8g0340651	Medtr8g014360	0	#N/A	1.18813	1.05092e-15	1.40873	5.01247e-22	0.560449	0.000377188	4	Putative ABC-type sulfate transporter
MtrunA17_Chr6g0484351	Medtr6g084320	0	#N/A	0	#N/A	1.01943	0.000795894	0	#N/A	4	Putative ABC-type xenobiotic transporter
MtrunA17_Chr6g0484361	#N/A	0	#N/A	0	#N/A	1.06481	0.00305312	0	#N/A	4	Putative ABC-type xenobiotic transporter
MtrunA17_Chr8g0351421	Medtr8g035810	0	#N/A	0.936023	4.14719e-05	0.926569	2.06008e-05	1.00198	5.14588e-06	4	Putative abieta-7,13-dien-18-ol hydroxylase
MtrunA17_Chr8g0334461	Medtr8g006690	0	#N/A	0.505374	0.00660417	1.0419	2.28299e-10	0	#N/A	4	Putative Acid phosphatase
MtrunA17_Chr8g0387641	Medtr8g099065	1.39489	1.66935e-05	0	#N/A	0.867011	0.00523821	0	#N/A	4	Putative adenosinetriphosphatase
MtrunA17_Chr6g0486081	Medtr6g488030	0	#N/A	0.552244	0.00791434	1.18046	2.79284e-11	1.41437	3.53554e-15	4	Putative adenosylhomocysteine nucleosidase
MtrunA17_Chr3g0125961	Medtr3g089977	0	#N/A	0.970887	0.000302601	0.883595	0.000664693	1.69594	3.75825e-11	4	Putative alcohol dehydrogenase
MtrunA17_Chr8g0390631	Medtr8g083520	0	#N/A	0.869367	9.06908e-10	1.07945	3.40686e-15	1.25945	2.67283e-19	4	Putative aldehyde dehydrogenase (NAD(P)(+))
MtrunA17_Chr7g0220911	Medtr7g417750	0	#N/A	0	#N/A	1.06231	9.32104e-06	0.633148	0.0161507	4	Putative allene-oxide cyclase
MtrunA17_Chr4g0041381	Medtr4g080160	0	#N/A	0	#N/A	1.06102	7.91643e-14	0	#N/A	4	Putative alpha,alpha-trehalose-phosphate synthase (UDP-forming), Trehalose-phosphatase
MtrunA17_Chr4g0073041	Medtr4g129270	0	#N/A	0	#N/A	1.55447	9.00936e-10	0.616198	0.0309607	4	Putative alpha,alpha-trehalose-phosphate synthase (UDP-forming), Trehalose-phosphatase
MtrunA17_Chr8g0364961	Medtr8g063790	0	#N/A	0.471382	0.0350324	1.15345	1.44692e-09	0.537795	0.0108705	4	Putative alpha,alpha-trehalose-phosphate synthase (UDP-forming), Trehalose-phosphatase
MtrunA17_Chr5g0402851	Medtr5g018300	0	#N/A	1.34341	7.55693e-12	1.64907	1.13519e-17	0	#N/A	4	Putative alpha/beta hydrolase-1
MtrunA17_Chr8g0336411	Medtr8g008505	0	#N/A	0.829916	7.98022e-08	1.08115	3.29371e-13	1.03125	1.55096e-11	4	Putative alpha/beta hydrolase-1
MtrunA17_Chr1g0159991	Medtr1g030265	0	#N/A	0.482887	0.0228302	1.16342	1.36386e-10	0.685122	0.000353678	4	Putative alpha-L-fucosidase	MtENOD8.3	early nodulin 8
MtrunA17_Chr8g0377701	Medtr8g080890	0	#N/A	1.07023	1.23884e-06	1.22417	4.27884e-10	0.645182	0.00202049	4	Putative amidase signature domain-containing protein
MtrunA17_Chr3g0130671	Medtr3g096840	0	#N/A	0.700017	1.59137e-09	1.1762	7.78348e-26	0.685528	4.37293e-09	4	Putative amino acid transporter, transmembrane domain-containing protein
MtrunA17_Chr4g0027241	Medtr4g055610	0	#N/A	1.08434	1.20636e-13	1.49347	2.18809e-25	0.55184	0.000400137	4	Putative amino acid transporter, transmembrane domain-containing protein
MtrunA17_Chr6g0458931	Medtr6g022790	0	#N/A	0.872523	7.18368e-12	1.21199	1.52561e-22	1.03162	8.29663e-16	4	Putative amino acid transporter, transmembrane domain-containing protein
MtrunA17_Chr7g0230011	Medtr7g038910	1.02351	1.24642e-06	0.552241	0.0116845	0.58503	0.00382699	0	#N/A	4	Putative amino acid transporter, transmembrane domain-containing protein
MtrunA17_Chr3g0130661	#N/A	0	#N/A	0.591592	1.26792e-06	1.03137	3.39508e-19	0.555016	5.51197e-06	4	Putative amino acid transporter, transmembrane domain-containing protein
MtrunA17_Chr1g0204971	Medtr1g103150	0	#N/A	0	#N/A	1.02709	0.000565791	0	#N/A	4	Putative amino-acid N-acetyltransferase transcription regulator GNAT family
MtrunA17_Chr7g0223351	Medtr7g024765	0	#N/A	0.902823	0.0313407	1.18827	0.00177018	0	#N/A	4	Putative aminoglycoside 6'-N-acetyltransferase transcription regulator GNAT family
MtrunA17_Chr1g0168631	Medtr1g045550	0	#N/A	0.798835	1.04026e-09	1.24634	5.9632e-23	0.578213	1.6516e-05	4	Putative ammonium transporter, ammonium/urea transporter
MtrunA17_Chr8g0370701	Medtr8g074040	0	#N/A	0	#N/A	1.0853	7.63753e-05	0.646836	0.0303397	4	Putative AMP-dependent synthetase/ligase, AMP-binding enzyme domain-containing protein
MtrunA17_Chr2g0297691	Medtr2g438720	0	#N/A	1.26853	0.00473242	1.31648	0.00167564	0.990195	0.0267428	4	Putative ankyrin repeat-containing domain, PGG domain, ankyrin repeat-containing domain superfamily
MtrunA17_Chr7g0276401	Medtr7g118300	0	#N/A	0.885222	2.50892e-07	1.03265	4.34622e-10	0.395894	0.0364745	4	Putative anthranilate N-methyltransferase
MtrunA17_Chr6g0485321	#N/A	0	#N/A	1.77658	1.10488e-10	2.02171	2.77185e-14	0	#N/A	4	Putative arabinogalactan protein 16/20/22/41
MtrunA17_Chr2g0320971	Medtr2g084875	0	#N/A	0.932	1.02551e-06	1.54374	1.85354e-17	0.534765	0.00846262	4	Putative arogenate dehydratase
MtrunA17_Chr4g0027131	Medtr4g055310	0	#N/A	1.2283	3.2761e-09	1.41014	3.08252e-12	0.582914	0.00960722	4	Putative arogenate dehydratase
MtrunA17_Chr6g0478871	#N/A	0	#N/A	0	#N/A	1.59078	3.39901e-11	0	#N/A	4	Putative aspartic peptidase domain superfamily
MtrunA17_Chr1g0155101	#N/A	0	#N/A	0	#N/A	1.79706	2.86516e-11	0	#N/A	4	Putative AT hook, DNA-binding protein
MtrunA17_Chr3g0133051	Medtr3g100470	0.829493	0.00128472	0.883019	0.000241255	1.6048	6.2268e-13	1.00428	1.73394e-05	4	Putative AT-hook motif nuclear-localized protein 15-29
MtrunA17_Chr3g0137271	Medtr3g106430	0	#N/A	0.862687	0.00555145	1.22045	1.60319e-05	0	#N/A	4	Putative Band 7 domain, Flotillin family, Band 7/SPFH domain superfamily	MtFLOT4	Flotillin 4 (TC133140)
MtrunA17_Chr2g0286431	Medtr2g020240	0	#N/A	0	#N/A	1.00669	3.94169e-05	0	#N/A	4	Putative beta-amylase
MtrunA17_Chr2g0299161	Medtr2g039120	0.529676	0.00497172	0.763845	3.81348e-06	1.29408	1.22065e-16	0.99532	7.98771e-10	4	Putative beta-galactosidase
MtrunA17_Chr8g0342001	Medtr8g016230	0	#N/A	0	#N/A	1.46464	1.35244e-05	0	#N/A	4	Putative beta-galactosidase
MtrunA17_Chr4g0006971	Medtr4g016920	0	#N/A	1.13322	1.87719e-09	0.724906	0.00014669	0.566981	0.00511651	4	Putative beta-glucosidase
MtrunA17_Chr4g0033341	Medtr4g066640	0	#N/A	1.56643	5.60452e-05	0.933791	0.0121862	0	#N/A	4	Putative beta-glucosidase
MtrunA17_Chr4g0049851	Medtr4g093580	0	#N/A	1.04634	2.3467e-08	1.18722	6.50361e-11	0.41684	0.0465629	4	Putative beta-ureidopropionase
MtrunA17_Chr1g0185311	Medtr1g071720	1.48499	0.00199264	0	#N/A	0.810391	0.0388651	0	#N/A	4	Putative bifunctional inhibitor/plant lipid transfer protein/seed storage helical	MtnsLTP113	non-specific Lipid Transfer Protein
MtrunA17_Chr3g0135321	Medtr3g103580	0.764007	0.0122442	0	#N/A	1.4001	3.17178e-08	0	#N/A	4	Putative branched-chain-amino-acid transaminase
MtrunA17_Chr4g0049241	Medtr4g092590	0	#N/A	1.17541	0.000972751	1.4922	7.10769e-06	1.08667	0.0018995	4	Putative branched-chain-amino-acid transaminase
MtrunA17_Chr8g0355331	Medtr8g445170	0	#N/A	1.13582	1.07751e-06	0.922448	5.63144e-05	0	#N/A	4	Putative BURP domain-containing protein
MtrunA17_Chr2g0313621	Medtr2g072180	0	#N/A	0	#N/A	1.60041	1.06023e-16	0	#N/A	4	Putative C2 domain, synaptotagmin-like mitochondrial-lipid-binding domain, C2 domain superfamily
MtrunA17_Chr2g0296051	Medtr2g436900	0	#N/A	0	#N/A	1.54137	8.32124e-16	0.466857	0.0332905	4	Putative C2 domain-containing protein
MtrunA17_Chr5g0435251	Medtr5g079880	0	#N/A	0.858972	9.28083e-09	1.22478	1.63733e-17	0.52239	0.00089136	4	Putative C2 domain-containing protein
MtrunA17_Chr8g0350211	Medtr8g432400	0	#N/A	1.26772	0.000950415	1.71526	1.23694e-06	0	#N/A	4	Putative C2 domain-containing protein
MtrunA17_Chr8g0350291	Medtr8g432490	0	#N/A	0	#N/A	1.45965	0.0006286	0	#N/A	4	Putative C2 domain-containing protein
MtrunA17_Chr8g0350201	#N/A	0	#N/A	0	#N/A	1.4949	0.00061746	0	#N/A	4	Putative C2 domain-containing protein
MtrunA17_Chr4g0057661	Medtr4g103655	0	#N/A	0	#N/A	1.34696	5.90654e-05	0	#N/A	4	Putative calcium binding protein
MtrunA17_Chr3g0108861	Medtr3g063050	0	#N/A	0	#N/A	1.46385	1.78788e-08	0	#N/A	4	Putative calcium uniporter protein
MtrunA17_Chr8g0391221	Medtr8g104510	0	#N/A	1.07245	0.000602437	0.889384	0.00330804	0	#N/A	4	Putative CALMODULIN-BINDING PROTEIN60
MtrunA17_Chr2g0280281	Medtr2g010580	0	#N/A	1.11133	0.00196305	0	#N/A	0	#N/A	4	Putative CAP superfamily protein	MtCAPE1	CAP-derived peptide
MtrunA17_Chr2g0281271	#N/A	0	#N/A	1.30835	5.83996e-07	1.52654	4.52786e-10	0.978825	0.000186044	4	Putative CAP superfamily protein
MtrunA17_Chr3g0117691	Medtr3g077940	0	#N/A	1.03381	0.00351761	1.57976	1.06812e-06	1.27357	0.000148117	4	Putative carbonic anhydrase
MtrunA17_Chr1g0146881	Medtr1g007860	0	#N/A	0.358601	0.0476673	1.21625	5.00899e-16	0	#N/A	4	Putative carboxylesterase
MtrunA17_Chr7g0219561	Medtr7g015220	0	#N/A	0.857946	1.32095e-06	1.25795	8.03547e-14	0.410265	0.0358387	4	Putative carboxylesterase
MtrunA17_Chr3g0126051	Medtr3g090150	0	#N/A	1.42633	3.07618e-07	1.27757	8.74716e-07	1.06511	7.49997e-05	4	Putative carboxypeptidase D
MtrunA17_Chr4g0066711	Medtr4g118800	0.614853	0.000727281	0	#N/A	1.12784	5.26993e-13	0	#N/A	4	Putative casparian strip membrane protein
MtrunA17_Chr4g0066721	Medtr4g118810	0	#N/A	0	#N/A	1.03833	2.11722e-05	0	#N/A	4	Putative casparian strip membrane protein
MtrunA17_Chr5g0432881	Medtr5g075680	0	#N/A	1.08145	0.00402108	0.973164	0.00646647	1.74641	6.54803e-07	4	Putative cation efflux protein	MtMTP13	Metal Tolerance Protein 13
MtrunA17_Chr7g0262901	Medtr7g099800	0	#N/A	1.2701	1.40433e-10	1.52302	3.84458e-15	1.42083	1.21241e-12	4	Putative cation/H+ exchanger, rossmann-like alpha/beta/alpha sandwich
MtrunA17_Chr4g0045491	Medtr4g087160	0	#N/A	0	#N/A	1.07764	3.71743e-05	0.942246	0.000508598	4	Putative CCG-binding protein
MtrunA17_Chr8g0356981	#N/A	0	#N/A	0.734442	1.58268e-12	1.09169	5.08167e-27	0.402519	0.000255222	4	Putative CDC50/LEM3 family protein
MtrunA17_Chr2g0322341	Medtr2g087900	0	#N/A	0	#N/A	1.01455	8.60205e-05	0	#N/A	4	Putative cellulose synthase (UDP-forming)
MtrunA17_Chr3g0121541	Medtr3g083920	0	#N/A	1.7508	1.50689e-05	2.0981	6.79056e-08	0	#N/A	4	Putative chalcone synthase	MtCHS-1A	Chalcone synthase 1A
MtrunA17_Chr5g0395501	Medtr5g007713	0.599135	0.0203785	1.23257	8.59455e-09	1.09823	1.81639e-07	0	#N/A	4	Putative chalcone synthase
MtrunA17_Chr1g0202261	Medtr1g099320	0	#N/A	0.612299	0.000375898	1.11336	1.65139e-12	1.02674	2.71167e-10	4	Putative chitinase
MtrunA17_Chr2g0297791	Medtr2g036240	0	#N/A	0	#N/A	1.24861	0.00536283	0	#N/A	4	Putative chitinase
MtrunA17_Chr2g0297811	Medtr8g046730	0	#N/A	0	#N/A	1.17306	0.00595051	0	#N/A	4	Putative chitinase
MtrunA17_Chr8g0370821	Medtr8g074330	1.01501	5.5638e-05	0.785608	0.0014789	0.629471	0.00874866	0	#N/A	4	Putative chitinase
MtrunA17_Chr6g0483681	Medtr6g082500	0	#N/A	1.40419	0.000605105	2.36568	1.10806e-09	0	#N/A	4	Putative chlorophyllase
MtrunA17_Chr1g0199601	Medtr1g094830	0	#N/A	1.1612	7.39442e-14	1.50988	3.69621e-23	0.561936	0.000656519	4	Putative chromatin regulator PHD family
MtrunA17_Chr2g0325161	Medtr2g090950	0	#N/A	0.351068	0.0161634	1.20466	1.6055e-22	0.629898	1.34525e-06	4	Putative chromatin regulator PHD family
MtrunA17_Chr4g0058071	Medtr4g104140	0	#N/A	0	#N/A	1.25618	1.2683e-07	0	#N/A	4	Putative chromatin remodeling & transcription regulator BTB-POZ family
MtrunA17_Chr5g0427811	Medtr5g066730	0	#N/A	0	#N/A	1.40249	3.72378e-05	0	#N/A	4	Putative chromatin remodeling & transcription regulator BTB-POZ family
MtrunA17_Chr4g0001321	Medtr4g006940	0.478563	0.0282712	0	#N/A	1.0846	2.88972e-10	0	#N/A	4	Putative cinnamoyl-CoA reductase
MtrunA17_Chr5g0427801	Medtr5g066730	0	#N/A	0	#N/A	1.24147	0.000433853	0	#N/A	4	Putative coagulation factor 5/8 domain, Galactose-binding-like domain superfamily
MtrunA17_Chr2g0309341	Medtr2g062770	0	#N/A	1.01955	6.46218e-06	1.06376	1.09047e-06	0.826037	0.000307079	4	Putative CTP synthase (glutamine hydrolyzing)
MtrunA17_Chr8g0369081	Medtr8g070540	0	#N/A	0	#N/A	1.00383	2.63738e-05	0	#N/A	4	Putative CTP synthase (glutamine hydrolyzing)
MtrunA17_Chr4g0067381	Medtr4g119930	0	#N/A	1.31769	2.35231e-13	1.41334	8.93095e-16	0.710761	0.000149583	4	Putative cullin
MtrunA17_Chr7g0216881	Medtr7g009710	0	#N/A	1.27781	6.62444e-06	1.3721	5.00023e-07	1.62749	4.72769e-09	4	Putative cysteamine dioxygenase
MtrunA17_Chr8g0384171	Medtr8g093550	0	#N/A	1.19524	7.62758e-07	1.62976	1.71959e-12	0.971029	5.9681e-05	4	Putative cysteine desulfurase, Selenocysteine lyase
MtrunA17_Chr2g0312011	Medtr2g069400	0	#N/A	1.11426	2.10208e-19	1.23367	5.59159e-24	0.429162	0.00138288	4	Putative cysteine-rich transmembrane CYSTM domain-containing protein
MtrunA17_Chr2g0312051	Medtr2g069430	0	#N/A	0	#N/A	1.5522	6.76872e-10	0.568532	0.0482993	4	Putative cysteine-rich transmembrane CYSTM domain-containing protein
MtrunA17_Chr2g0312031	#N/A	0	#N/A	0	#N/A	1.0998	3.85533e-11	0.402765	0.0347246	4	Putative cysteine-rich transmembrane CYSTM domain-containing protein
MtrunA17_Chr4g0076051	Medtr4g133620	0.402091	0.030961	0.914733	1.28546e-09	1.25162	1.04391e-17	0.367363	0.0288201	4	Putative cytochrome b561 and DOMON domain-containing protein
MtrunA17_Chr1g0162571	Medtr1g034320	0	#N/A	0.965866	2.98349e-07	1.32474	2.2665e-13	0.54555	0.0063175	4	Putative cytochrome P450
MtrunA17_Chr3g0082701	Medtr3g014880	0	#N/A	1.67549	7.88139e-10	0.941134	0.000558497	0.892473	0.00126304	4	Putative cytochrome P450
MtrunA17_Chr4g0011921	Medtr4g026050	0	#N/A	0.79453	3.08073e-07	1.11415	5.32484e-14	0.420179	0.011216	4	Putative cytochrome P450
MtrunA17_Chr4g0047631	Medtr4g089020	0	#N/A	0.823778	1.90681e-08	1.38697	8.85049e-23	0.568224	0.000185179	4	Putative cytochrome P450
MtrunA17_Chr4g0058231	Medtr4g104610	0	#N/A	0.977253	0.000172915	0.895178	0.000298902	1.53834	2.56495e-10	4	Putative cytochrome P450
MtrunA17_Chr7g0225531	Medtr7g029275	0	#N/A	0.777132	1.27261e-06	1.26928	4.7602e-17	0.51773	0.00186126	4	Putative cytochrome P450
MtrunA17_Chr6g0484841	#N/A	0.664861	0.000164745	1.03483	4.04194e-11	1.27457	6.45182e-17	1.17504	8.00386e-14	4	Putative cytochrome P450
MtrunA17_Chr5g0431461	#N/A	0	#N/A	1.07223	4.72341e-05	1.27629	3.58915e-07	0	#N/A	4	Putative cytochrome P450
MtrunA17_Chr5g0423601	#N/A	0	#N/A	0.619429	0.00102125	1.04221	8.38832e-10	0.445869	0.0228761	4	Putative cytochrome P450 superfamily
MtrunA17_Chr4g0020621	Medtr4g044110	0	#N/A	1.4769	1.32171e-07	1.24096	4.01739e-06	0	#N/A	4	Putative cytokinin dehydrogenase
MtrunA17_Chr1g0187821	Medtr1g093120	0.559887	0.00132249	1.01857	2.3589e-11	1.04106	2.13188e-12	0.467829	0.00422274	4	Putative deacetoxyvindoline 4-hydroxylase
MtrunA17_Chr3g0082001	Medtr3g013890	0	#N/A	0.85704	0.000933018	1.30274	4.54696e-08	0.572039	0.035308	4	Putative delta(4)-3-oxosteroid 5-beta-reductase
MtrunA17_Chr4g0068121	Medtr4g121570	0	#N/A	1.1075	2.67776e-10	1.02142	3.03906e-09	0	#N/A	4	Putative delta(4)-3-oxosteroid 5-beta-reductase
MtrunA17_Chr1g0167721	Medtr1g043190	0	#N/A	0.851994	7.43176e-06	1.20028	2.78535e-11	1.14527	6.59474e-10	4	Putative deoxyribodipyrimidine photo-lyase
MtrunA17_Chr8g0351061	Medtr8g033290	0.557223	0.010029	0.742282	8.2763e-05	1.71083	3.49648e-23	0.92411	2.11225e-07	4	Putative DEP domain, glutaredoxin, Thioredoxin-like superfamily
MtrunA17_Chr3g0079071	Medtr3g408340	0	#N/A	0.780269	0.000526749	1.38607	8.02043e-12	1.08134	1.53076e-07	4	Putative derlin
MtrunA17_Chr8g0384961	Medtr8g094940	0	#N/A	0	#N/A	1.02847	4.47948e-09	0	#N/A	4	Putative diacylglycerol kinase (ATP)
MtrunA17_Chr8g0360931	Medtr8g464780	0	#N/A	0.585309	0.00201479	1.10736	7.80283e-11	0	#N/A	4	Putative diacylglycerol kinase (ATP)
MtrunA17_Chr4g0065821	Medtr4g117450	0	#N/A	0.998742	1.91668e-14	1.37785	5.3161e-27	0.938932	1.46115e-12	4	Putative dienelactone hydrolase, alpha/Beta hydrolase
MtrunA17_Chr7g0254691	Medtr7g087570	0.774789	0.00246803	1.36286	7.90118e-10	0.942116	2.18687e-05	0	#N/A	4	Putative dihydrofolate reductase
MtrunA17_Chr7g0259121	Medtr7g093870	0	#N/A	1.32279	8.43967e-12	1.51478	1.59398e-15	1.142	6.20494e-09	4	Putative dirigent protein
MtrunA17_Chr1g0208441	#N/A	0.641969	0.0119853	0	#N/A	1.1694	1.25415e-08	0	#N/A	4	Putative DNA helicase
MtrunA17_Chr4g0001611	Medtr4g007300	0	#N/A	0.748739	0.00101877	1.34487	1.0738e-10	0.512968	0.0297184	4	Putative DnaJ domain, Chaperone J-domain superfamily
MtrunA17_Chr4g0050581	Medtr4g094275	0	#N/A	1.53219	6.438e-10	1.73488	5.38957e-13	0	#N/A	4	Putative DnaJ domain, Chaperone J-domain superfamily
MtrunA17_Chr2g0282561	Medtr2g014240	0	#N/A	0	#N/A	1.16778	2.62802e-07	0	#N/A	4	Putative dormancy/auxin associated protein
MtrunA17_Chr8g0344711	Medtr8g022300	0	#N/A	0	#N/A	1.61606	0.000109018	0	#N/A	4	Putative dormancy/auxin associated protein
MtrunA17_Chr3g0116141	Medtr3g089090	0	#N/A	0	#N/A	1.88019	3.03247e-06	0	#N/A	4	Putative EF-hand domain pair protein CML	MtCML16	Calmodulin-like 16
MtrunA17_Chr4g0057651	Medtr4g103650	0	#N/A	0	#N/A	2.25449	4.1218e-10	0	#N/A	4	Putative EF-hand domain pair protein CML
MtrunA17_Chr7g0245371	Medtr7g074240	0	#N/A	1.0054	1.48236e-08	1.28842	5.58951e-14	0.560565	0.00289504	4	Putative EF-hand domain pair protein CML	MtCML39	Calmodulin-like 39
MtrunA17_Chr2g0296671	Medtr2g437910	0	#N/A	0.594912	5.48882e-06	0.973854	2.51747e-15	1.01551	1.12643e-15	4	Putative EGF-like calcium-binding domain, PA domain-containing protein
MtrunA17_Chr2g0323211	Medtr2g089210	0	#N/A	0	#N/A	1.00463	4.96478e-05	0	#N/A	4	Putative EH domain, EF-hand domain pair protein
MtrunA17_Chr1g0154571	Medtr1g021915	0	#N/A	0.704702	0.0420921	2.08653	7.15975e-13	0	#N/A	4	Putative ELO family protein
MtrunA17_Chr1g0165011	Medtr1g038810	0.546324	0.00246803	0.62099	0.000144953	1.08301	5.29196e-13	0	#N/A	4	Putative endonuclease/exonuclease/phosphatase
MtrunA17_Chr1g0184041	#N/A	0	#N/A	1.21587	1.76895e-06	1.14711	9.38279e-07	1.15757	4.4015e-07	4	Putative endopeptidase Clp
MtrunA17_Chr8g0365891	Medtr8g065010	0	#N/A	1.42672	0.000449134	0	#N/A	0	#N/A	4	Putative endo-polygalacturonase
MtrunA17_Chr5g0399301	Medtr5g012680	0	#N/A	0.932904	2.73706e-06	1.13694	2.42743e-09	1.53109	2.47661e-15	4	Putative envelysin
MtrunA17_Chr7g0231451	#N/A	0	#N/A	0	#N/A	1.24736	1.62134e-07	0	#N/A	4	Putative exocyst complex component Exo70
MtrunA17_Chr4g0030621	Medtr4g062330	0	#N/A	1.86446	3.94959e-17	1.43702	2.42118e-11	0	#N/A	4	Putative exocyst complex component Exo70, cullin repeat-like-containing domain superfamily
MtrunA17_Chr5g0431741	Medtr5g073460	0	#N/A	0.79454	0.00923549	1.45837	3.13592e-08	0.695921	0.0159778	4	Putative exocyst complex component Exo70, cullin repeat-like-containing domain superfamily
MtrunA17_Chr4g0038741	Medtr4g075790	0	#N/A	0	#N/A	1.20697	6.22918e-06	0	#N/A	4	Putative expansin/Lol pI, expansin, cellulose-binding-like domain superfamily
MtrunA17_Chr5g0399811	Medtr5g013440	1.4596	1.48254e-06	1.19693	4.32863e-05	0.972607	0.000622734	0	#N/A	4	Putative expansin/Lol pI, expansin, cellulose-binding-like domain superfamily
MtrunA17_Chr4g0032531	Medtr4g065113	0	#N/A	0.923995	0.00105467	1.21141	3.87244e-06	0.813481	0.00368404	4	Putative Extensin domain-containing protein
MtrunA17_Chr6g0463491	Medtr6g034905	0	#N/A	0.570041	0.000288287	1.13523	2.90759e-15	0.829585	2.92764e-08	4	Putative Extensin domain-containing protein
MtrunA17_Chr1g0211151	Medtr1g112750	0	#N/A	0.983044	0.018792	0.802838	0.041087	1.18057	0.00203117	4	Putative FAD-binding domain, FAD/NAD(P)-binding domain superfamily
MtrunA17_Chr8g0360071	Medtr8g058965	0	#N/A	0.50056	0.0244235	1.13946	5.1064e-10	0.804967	3.09173e-05	4	Putative F-box domain, FBD domain, leucine-rich repeat domain superfamily
MtrunA17_Chr2g0332031	Medtr2g102370	0	#N/A	0	#N/A	1.76127	1.18692e-14	0	#N/A	4	Putative F-box domain, kelch-type beta propeller, F-box-like domain superfamily
MtrunA17_Chr6g0468971	Medtr6g049050	0	#N/A	0.98767	2.30976e-05	1.63999	8.74596e-14	0	#N/A	4	Putative F-box domain, kelch-type beta propeller, F-box-like domain superfamily
MtrunA17_Chr8g0377241	Medtr8g080370	0	#N/A	0.596606	0.0352057	1.66867	5.74106e-12	0.744102	0.00488713	4	Putative F-box domain, kelch-type beta propeller, F-box-like domain superfamily
MtrunA17_Chr2g0321721	Medtr2g086920	0	#N/A	1.14431	5.67058e-08	1.87025	4.21683e-20	0	#N/A	4	Putative F-box domain-containing protein
MtrunA17_Chr3g0088531	Medtr3g029620	0	#N/A	1.24578	2.36372e-08	1.28195	1.15161e-09	0.773832	0.000599501	4	Putative F-box domain-containing protein
MtrunA17_Chr3g0094081	Medtr3g436860	0	#N/A	0.797439	2.63497e-05	1.443	4.12669e-16	0.646651	0.000871983	4	Putative F-box domain-containing protein
MtrunA17_Chr3g0134591	#N/A	1.4211	0.0096545	1.35009	0.00651557	1.04067	0.0286465	0	#N/A	4	Putative flavonoid 3',5'-hydroxylase
MtrunA17_Chr6g0450811	Medtr6g007170	0	#N/A	1.62119	1.21167e-22	1.08984	3.25565e-11	0.596185	0.000765191	4	Putative formate dehydrogenase
MtrunA17_Chr1g0162561	Medtr1g034300	0	#N/A	0.70989	5.54833e-05	1.18579	2.81644e-13	0	#N/A	4	Putative G protein alpha subunit, helical insertion
MtrunA17_Chr3g0116641	Medtr3g075510	0	#N/A	0	#N/A	1.63604	8.4387e-08	0	#N/A	4	Putative galactinol--sucrose galactosyltransferase
MtrunA17_Chr4g0064311	Medtr4g115330	0	#N/A	0	#N/A	1.24601	9.65036e-07	0	#N/A	4	Putative galactinol--sucrose galactosyltransferase
MtrunA17_Chr7g0251151	Medtr7g082570	1.0364	0.00750015	0	#N/A	1.48644	7.06234e-06	0	#N/A	4	Putative gamma-glutamyl-gamma-aminobutyrate hydrolase
MtrunA17_Chr8g0349301	Medtr8g031390	0	#N/A	0.616572	0.000134265	1.28089	2.24977e-18	0.728455	2.64192e-06	4	Putative GDSL lipase/esterase, SGNH hydrolase superfamily
MtrunA17_Chr8g0349321	Medtr8g031400	0	#N/A	1.11397	1.32171e-07	1.67959	1.53969e-16	0	#N/A	4	Putative GDSL lipase/esterase, SGNH hydrolase superfamily
MtrunA17_Chr7g0251801	Medtr7g083570	0	#N/A	0	#N/A	1.0184	9.24518e-07	0.603777	0.00748597	4	Putative GEM-like protein
MtrunA17_Chr8g0388871	Medtr8g100065	0	#N/A	1.01813	5.79708e-06	2.01724	2.58289e-21	0	#N/A	4	Putative GEM-like protein
MtrunA17_Chr7g0246151	Medtr7g075580	0	#N/A	1.62887	8.38136e-12	1.95445	3.75892e-17	0	#N/A	4	Putative geraniol 8-hydroxylase
MtrunA17_Chr5g0421331	Medtr0035s0150	0	#N/A	1.0319	1.52793e-06	1.31899	1.20569e-10	0.987244	4.61145e-06	4	Putative GH3 family protein	MtGH3	auxin-responsive GH3 family protein
MtrunA17_Chr5g0401621	#N/A	0.745972	0.0224695	0	#N/A	1.08607	4.98097e-05	0	#N/A	4	Putative GH3 family protein
MtrunA17_Chr5g0401631	#N/A	0.678599	0.0337187	0	#N/A	1.08865	2.60129e-05	0	#N/A	4	Putative GH3 family protein
MtrunA17_Chr4g0052251	Medtr4g096840	0	#N/A	0.916665	0.0191201	0.738149	0.0473124	1.2066	0.00088982	4	Putative gibberellin 2-beta-dioxygenase	MtGA2ox3	Gibberellin C20-GA2-oxidase 3 (GA inactivation)
MtrunA17_Chr3g0079451	Medtr3g009020	0	#N/A	0.780227	4.48886e-06	1.00669	5.25223e-10	0.91656	5.56886e-08	4	Putative glucan 1,3-beta-glucosidase
MtrunA17_Chr3g0079461	Medtr3g009030	0	#N/A	0.785882	0.00650533	1.37806	9.18588e-08	0.647205	0.0277514	4	Putative glucan 1,3-beta-glucosidase
MtrunA17_Chr6g0456601	Medtr6g016820	0	#N/A	0.615052	2.11995e-05	1.40278	2.6841e-25	0	#N/A	4	Putative glucan endo-1,3-beta-D-glucosidase
MtrunA17_Chr7g0228611	Medtr7g037440	0	#N/A	1.52934	9.02047e-22	1.12629	1.03699e-12	0.424747	0.0173104	4	Putative glucose-6-phosphate dehydrogenase (NADP(+))
MtrunA17_Chr6g0449231	Medtr6g004430	0	#N/A	0	#N/A	1.30852	3.28079e-09	0	#N/A	4	Putative glucuronokinase
MtrunA17_Chr4g0065571	Medtr4g117050	0	#N/A	0.914694	0.00032172	0.917488	0.000159466	1.43368	3.14665e-09	4	Putative glutamine amidotransferase type 2 domain, nucleophile aminohydrolase
MtrunA17_Chr5g0417011	Medtr5g040430	0	#N/A	1.0162	4.46948e-07	1.25169	1.00667e-10	0	#N/A	4	Putative glutathione transferase
MtrunA17_Chr1g0158311	Medtr1g027690	0.417607	0.0329374	0.706554	1.61047e-05	1.02069	2.37971e-11	0	#N/A	4	Putative glycerophosphodiester phosphodiesterase, protein kinase RLK-Pelle-LRK10L-2 family
MtrunA17_Chr1g0158341	Medtr1g027730	0.731589	0.0329231	1.04512	0.000646841	0.819542	0.00360373	0	#N/A	4	Putative glycerophosphodiester phosphodiesterase, protein kinase RLK-Pelle-LRK10L-2 family
MtrunA17_Chr1g0158631	Medtr1g028090	0	#N/A	1.08958	4.17065e-06	1.39083	5.81034e-10	0.996488	2.01083e-05	4	Putative glycerophosphodiester phosphodiesterase, protein kinase RLK-Pelle-LRK10L-2 family
MtrunA17_Chr1g0158661	Medtr1g028170	0	#N/A	0	#N/A	1.19935	9.9948e-08	0	#N/A	4	Putative glycerophosphodiester phosphodiesterase, protein kinase RLK-Pelle-LRK10L-2 family
MtrunA17_Chr1g0158771	Medtr1g028290	0	#N/A	0.949722	0.00164466	0.829427	0.00378129	1.67748	1.51466e-09	4	Putative glycerophosphodiester phosphodiesterase, protein kinase RLK-Pelle-LRK10L-2 family
MtrunA17_Chr1g0209511	Medtr1g110270	0	#N/A	0.948125	9.20998e-08	1.63948	4.88803e-22	0.546649	0.00341379	4	Putative glycerophosphodiester phosphodiesterase, protein kinase RLK-Pelle-LRK10L-2 family
MtrunA17_Chr6g0483851	Medtr6g082950	0	#N/A	1.19927	3.74583e-07	0.835779	0.000249027	0.852345	0.00024192	4	Putative glycerophosphodiester phosphodiesterase, protein kinase RLK-Pelle-LRK10L-2 family
MtrunA17_Chr6g0467641	Medtr6g445600	0	#N/A	1.24617	1.58919e-05	1.2849	2.5437e-06	0.953191	0.000980646	4	Putative glycerophosphodiester phosphodiesterase, protein kinase RLK-Pelle-LRK10L-2 family
MtrunA17_Chr7g0250931	Medtr7g082300	0	#N/A	0.693219	0.00464903	1.54207	2.91428e-13	0	#N/A	4	Putative glycerophosphodiester phosphodiesterase, protein kinase RLK-Pelle-LRK10L-2 family
MtrunA17_Chr7g0251061	Medtr7g082460	0	#N/A	0.826864	8.02871e-07	1.19495	3.49155e-14	0.50147	0.00417497	4	Putative glycerophosphodiester phosphodiesterase, protein kinase RLK-Pelle-LRK10L-2 family
MtrunA17_Chr1g0157791	#N/A	0	#N/A	1.06614	2.57685e-08	1.26658	5.89182e-12	0.78603	5.34513e-05	4	Putative glycerophosphodiester phosphodiesterase, protein kinase RLK-Pelle-LRK10L-2 family
MtrunA17_Chr1g0158571	#N/A	0	#N/A	1.4591	1.29685e-06	1.04029	0.000252718	0.645265	0.0369041	4	Putative glycerophosphodiester phosphodiesterase, protein kinase RLK-Pelle-LRK10L-2 family
MtrunA17_Chr1g0157811	#N/A	0	#N/A	1.27374	1.81222e-05	2.06751	1.37082e-14	0	#N/A	4	Putative glycerophosphodiester phosphodiesterase, protein kinase RLK-Pelle-LRK10L-2 family
MtrunA17_Chr7g0232441	#N/A	0	#N/A	0	#N/A	1.17589	8.3851e-09	0	#N/A	4	Putative glycerophosphodiester phosphodiesterase, protein kinase RLK-Pelle-LRK10L-2 family
MtrunA17_Chr5g0423131	Medtr5g055480	0	#N/A	0.784398	3.41408e-05	1.02554	9.62154e-09	0	#N/A	4	Putative glycosyl transferase, family 14
MtrunA17_Chr2g0280361	Medtr2g010710	0	#N/A	0.823868	2.43721e-05	1.54403	3.0517e-17	0.963024	4.20686e-07	4	Putative Gnk2-like domain-containing protein
MtrunA17_Chr2g0280391	Medtr2g010730	0	#N/A	0.478418	0.0493269	1.19249	6.64131e-09	0.839995	0.000101615	4	Putative Gnk2-like domain-containing protein
MtrunA17_Chr1g0150771	#N/A	0	#N/A	0	#N/A	1.10703	6.25012e-14	0	#N/A	4	Putative harbinger transposase-derived nuclease domain-containing protein
MtrunA17_Chr6g0462601	Medtr6g033760	0	#N/A	0.9607	0.0177988	1.78899	1.20371e-07	0	#N/A	4	Putative Heat shock protein 70 family
MtrunA17_Chr6g0462681	Medtr6g033850	1.20013	4.27596e-05	1.33948	6.17376e-07	1.44962	1.89027e-08	0	#N/A	4	Putative Heat shock protein 70 family
MtrunA17_Chr6g0462711	Medtr6g033870	1.43297	0.00183031	1.28135	0.00195412	0.974114	0.0146149	0	#N/A	4	Putative Heat shock protein 70 family
MtrunA17_Chr1g0202581	Medtr1g099815	0	#N/A	0.836447	0.0133021	1.08157	0.000428511	0.687886	0.0414591	4	Putative heavy metal-associated domain, HMA
MtrunA17_Chr1g0202541	Medtr1g099800	0	#N/A	0.550176	0.010603	1.06293	2.1039e-08	0	#N/A	4	Putative heavy metal-associated domain, HMA, heavy metal-associated domain superfamily
MtrunA17_Chr4g0036931	Medtr4g073040	-0.801402	0.00393354	0.579408	0.0343504	1.73703	1.19995e-13	0	#N/A	4	Putative heavy metal-associated domain, HMA, heavy metal-associated domain superfamily
MtrunA17_Chr4g0056241	Medtr4g101025	0	#N/A	1.01617	2.5348e-05	1.2659	1.50356e-08	0.801358	0.000919587	4	Putative heavy metal-associated domain, HMA, heavy metal-associated domain superfamily
MtrunA17_Chr1g0197731	Medtr1g090920	0	#N/A	1.44226	8.36076e-11	2.01459	2.48722e-20	0	#N/A	4	Putative hexosyltransferase
MtrunA17_Chr1g0154381	Medtr1g021652	0	#N/A	0.908601	1.12627e-06	1.34317	3.18128e-14	0	#N/A	4	Putative hydroperoxide dehydratase	MtAOS1	allene oxide synthase 1 (TC101097)
MtrunA17_Chr7g0232401	Medtr0184s0030	0	#N/A	0.576325	0.00357026	1.12393	1.8123e-10	0	#N/A	4	Putative hydroquinone glucosyltransferase
MtrunA17_Chr8g0336731	Medtr8g009067	0	#N/A	0.475713	0.0124118	1.07893	6.50722e-11	0.668226	0.000125217	4	Putative hydroquinone glucosyltransferase
MtrunA17_Chr5g0442831	Medtr5g091050	0	#N/A	0	#N/A	2.51335	1.63848e-09	0	#N/A	4	Putative hydroxymethylglutaryl-CoA reductase (NADPH)	MtHMGR4	3-hydroxy-3-methylglutaryl coenzyme A reductase 4
MtrunA17_Chr2g0286751	Medtr2g020750	0	#N/A	1.16542	6.95278e-10	1.08076	5.87538e-09	0.67161	0.000756961	4	Putative inosine/uridine-preferring nucleoside hydrolase domain, ribonucleoside hydrolase
MtrunA17_Chr8g0341281	Medtr8g015220	0.620361	0.0289582	0	#N/A	1.21758	1.12074e-07	0	#N/A	4	Putative inositol oxygenase
MtrunA17_Chr4g0057321	Medtr4g102840	0	#N/A	1.23497	1.65207e-06	1.40968	1.07377e-08	0.767408	0.00431599	4	Putative IQ motif, EF-hand binding protein
MtrunA17_Chr6g0462551	Medtr6g033675	0	#N/A	1.22437	1.4932e-13	1.23048	4.60392e-14	0	#N/A	4	Putative isoflavone 7-O-glucosyltransferase
MtrunA17_Chr7g0219121	#N/A	0.633617	0.0221403	1.19461	6.0472e-08	1.19822	2.07785e-08	0	#N/A	4	Putative isoflavone-7-O-beta-glucoside 6''-O-malonyltransferase
MtrunA17_Chr4g0038671	Medtr4g075690	0	#N/A	0	#N/A	1.78802	5.55877e-09	0	#N/A	4	Putative laccase
MtrunA17_Chr7g0240991	Medtr7g065980	0	#N/A	1.41814	6.89247e-22	1.31412	1.70007e-19	0.822946	5.84011e-08	4	Putative laccase
MtrunA17_Chr3g0109471	#N/A	0	#N/A	0.666539	0.00616849	1.093	4.6527e-07	1.25517	6.55767e-09	4	Putative lactoylglutathione lyase
MtrunA17_Chr3g0109121	Medtr3g063310	0.342758	0.026934	0.980768	6.16151e-16	1.12611	2.20728e-21	0.629628	3.96256e-07	4	Putative Late embryogenesis abundant protein, LEA_2 subgroup
MtrunA17_Chr5g0440571	Medtr5g087760	0	#N/A	0	#N/A	1.46967	3.85642e-09	0.604725	0.0365633	4	Putative Late embryogenesis abundant protein, LEA_2 subgroup
MtrunA17_Chr6g0479081	Medtr6g071400	0	#N/A	0	#N/A	1.13748	3.39808e-05	0	#N/A	4	Putative Late embryogenesis abundant protein, LEA_2 subgroup
MtrunA17_Chr8g0387601	Medtr8g099035	0	#N/A	0.547204	0.000660376	1.14583	2.42292e-15	0	#N/A	4	Putative Late embryogenesis abundant protein, LEA_2 subgroup
MtrunA17_Chr8g0345021	Medtr8g022990	0	#N/A	0	#N/A	1.25082	0.00435601	0	#N/A	4	Putative Late embryogenesis abundant protein, LEA_3 subgroup
MtrunA17_Chr6g0468381	Medtr0256s0050	0	#N/A	0.545948	0.0201857	1.44867	6.42056e-13	0	#N/A	4	Putative leucine-rich repeat domain superfamily
MtrunA17_Chr5g0412701	Medtr5g032910	0	#N/A	0.92614	6.20887e-08	1.12315	6.83104e-12	0.723384	2.47077e-05	4	Putative leucine-rich repeat domain superfamily
MtrunA17_Chr8g0358791	Medtr8g445800	0.562222	0.00103619	1.05648	1.21473e-12	1.18536	3.99418e-16	0.451107	0.00527678	4	Putative leucine-rich repeat domain superfamily
MtrunA17_Chr1g0204911	Medtr1g103080	0	#N/A	1.01341	9.02483e-08	1.82931	1.10838e-23	0	#N/A	4	Putative leucine-rich repeat-containing, plant-type, leucine-rich repeat domain superfamily
MtrunA17_Chr5g0439921	Medtr5g086630	0	#N/A	1.3323	0.00197844	1.28055	0.000886034	0	#N/A	4	Putative leucine-rich repeat-containing, plant-type, leucine-rich repeat domain superfamily
MtrunA17_Chr6g0465181	Medtr6g038790	0	#N/A	0.766755	7.27323e-08	1.15766	1.82454e-17	0.402534	0.00840583	4	Putative leucine-rich repeat-containing, plant-type, leucine-rich repeat domain superfamily
MtrunA17_Chr4g0033171	Medtr4g066170	-1.1235	0.00116149	0.843745	0.0129382	1.10971	0.0003279	-0.910038	0.00490378	4	Putative linoleate 13S-lipoxygenase	MtLOX1	lipoxygenase (TC100514)
MtrunA17_Chr4g0033181	Medtr4g066170	-1.10946	0.0027318	0.816069	0.0263206	1.16324	0.000383888	-0.839909	0.0152305	4	Putative linoleate 13S-lipoxygenase	MtLOX5	lipoxygenase (TC100513)
MtrunA17_Chr8g0344201	Medtr8g020970	0	#N/A	0.529959	0.00602172	1.37705	4.67422e-16	0	#N/A	4	Putative linoleate 13S-lipoxygenase	MtLOX6	lipoxygenase (TC97760)
MtrunA17_Chr7g0237521	Medtr7g058640	0	#N/A	1.48229	8.17768e-08	1.66993	3.03468e-10	0	#N/A	4	Putative Longin domain, v-SNARE, coiled-coil domain-containing protein	MtVAMP721c	vesicle-associated membrane protein 721c
MtrunA17_Chr4g0052691	Medtr4g094730	0	#N/A	0.976873	5.90356e-17	1.00219	3.04381e-18	0.650906	6.39083e-08	4	Putative LysM domain-containing protein	MtLYM2	LysM domain-containing GPI-anchored protein 2
MtrunA17_Chr6g0461791	Medtr6g033100	0	#N/A	0.814315	2.09053e-09	1.20177	4.5229e-20	0	#N/A	4	Putative magnesium transporter NIPA
MtrunA17_Chr7g0255141	Medtr7g088340	0	#N/A	0.772201	1.91915e-07	0.753451	1.85971e-07	1.04055	1.21241e-12	4	Putative magnesium-protoporphyrin IX monomethyl ester (oxidative) cyclase
MtrunA17_Chr4g0028551	Medtr4g057890	0	#N/A	1.7879	7.94937e-05	1.54815	0.000426124	0	#N/A	4	Putative major facilitator superfamily, MFS transporter superfamily	MtNRT2.1	nitrate transporter 2.1
MtrunA17_Chr2g0319001	Medtr2g081930	0	#N/A	1.14211	5.79117e-08	1.22664	1.80673e-09	0.61187	0.00749419	4	Putative major facilitator, sugar transporter, major facilitator superfamily
MtrunA17_Chr4g0048051	Medtr4g090600	1.20659	5.31376e-07	0	#N/A	0.9854	2.87081e-05	0	#N/A	4	Putative major facilitator, sugar transporter, major facilitator superfamily	MtSTP1_7	sugar transport protein 1 (Sugar carrier protein c)(polyol/monosaccharide transporter 1)
MtrunA17_Chr4g0048411	Medtr4g091370	0.500587	0.00016566	0.570941	3.23093e-06	1.1083	6.04287e-22	0.428395	0.000654497	4	Putative major facilitator, sugar transporter, major facilitator superfamily	Mtst1	Sugar transport protein 1
MtrunA17_Chr8g0376631	#N/A	1.36498	0.0135188	0	#N/A	1.54414	0.00166164	0	#N/A	4	Putative major facilitator, sugar transporter, major facilitator superfamily
MtrunA17_Chr3g0122211	Medtr3g084930	0	#N/A	1.01061	1.3392e-10	1.55424	2.56284e-24	0.496464	0.0036357	4	Putative membrane attack complex component/perforin (MACPF) domain-containing protein
MtrunA17_Chr4g0046841	Medtr4g088500	0	#N/A	0.584152	3.30214e-06	1.02326	3.23187e-18	0.384517	0.00324499	4	Putative membrane attack complex component/perforin (MACPF) domain-containing protein
MtrunA17_Chr8g0391931	Medtr8g105700	0	#N/A	0	#N/A	1.02448	3.08339e-19	0	#N/A	4	Putative membrane attack complex component/perforin (MACPF) domain-containing protein
MtrunA17_Chr7g0218181	Medtr7g011990	-0.49112	0.0274826	1.04752	9.14843e-09	1.21199	7.67348e-12	0.901261	1.01617e-06	4	Putative methyltransferase
MtrunA17_Chr1g0210274	Medtr1g111510	0	#N/A	1.25864	6.44663e-10	1.4059	1.3968e-12	1.04476	3.9784e-07	4	Putative MFS transporter superfamily
MtrunA17_Chr8g0369621	Medtr8g071920	0	#N/A	1.2347	1.05184e-05	1.4688	4.16985e-08	1.054	0.000230961	4	Putative MFS transporter superfamily
MtrunA17_Chr8g0367641	Medtr8g068890	0	#N/A	0.803978	0.000744024	1.5129	2.39681e-12	0.625095	0.00869632	4	Putative mitochondrial carrier protein
MtrunA17_Chr7g0241521	Medtr7g066690	0	#N/A	0	#N/A	1.04135	0.000768315	0	#N/A	4	Putative mitochondrial carrier UCP, mitochondrial carrier domain superfamily
MtrunA17_Chr8g0369771	Medtr8g072220	0.534624	0.0123466	0.94948	1.21294e-07	1.61027	3.31984e-22	0.461035	0.0161507	4	Putative modifying wall lignin-1/2
MtrunA17_Chr3g0092051	Medtr3g435370	0	#N/A	1.02876	0.00178832	0.729286	0.0249844	1.38672	7.46396e-06	4	Putative monodehydroascorbate reductase (NADH)
MtrunA17_Chr8g0353131	Medtr8g039090	0	#N/A	1.43676	1.5139e-12	1.52079	2.61722e-14	0	#N/A	4	Putative NAD(P)H dehydrogenase (quinone), NADH:ubiquinone reductase (H(+)-translocating)
MtrunA17_Chr1g0192121	Medtr1g083290	0	#N/A	0.918541	6.22227e-05	1.28207	2.94298e-09	1.2696	9.95007e-09	4	Putative NAD(P)H oxidase (H(2)O(2)-forming)	MtRbohA	RESPIRATORY BURST OXIDASE HOMOLOG A
MtrunA17_Chr7g0272591	Medtr7g113130	0	#N/A	1.12218	3.30182e-12	1.62687	7.84701e-25	0	#N/A	4	Putative NAD(P)H oxidase (H(2)O(2)-forming)	MtRbohG	RESPIRATORY BURST OXIDASE HOMOLOG G
MtrunA17_Chr4g0048041	Medtr4g090580	0	#N/A	1.51455	4.60988e-07	1.91679	3.93211e-11	0	#N/A	4	Putative NADH:ubiquinone reductase (non-electrogenic)
MtrunA17_Chr4g0014951	#N/A	0	#N/A	0.650154	0.000359665	1.08347	1.09052e-10	0.901772	1.51773e-07	4	Putative NADPH:quinone reductase
MtrunA17_Chr3g0113231	Medtr3g070230	0	#N/A	0	#N/A	1.43218	9.43853e-13	0	#N/A	4	Putative nematode resistance protein-like HSPRO1
MtrunA17_Chr1g0159791	Medtr1g029810	0	#N/A	0	#N/A	1.02116	1.2716e-15	0.308472	0.0378589	4	Putative nepenthesin
MtrunA17_Chr2g0287841	Medtr2g022480	0	#N/A	0.800415	0.000796871	2.26586	8.33805e-25	0	#N/A	4	Putative nepenthesin
MtrunA17_Chr2g0287861	Medtr2g022490	0	#N/A	0	#N/A	1.34696	1.62793e-09	-0.660143	0.00712002	4	Putative nepenthesin
MtrunA17_Chr3g0095891	Medtr3g046300	0	#N/A	1.33282	9.04129e-06	1.62082	8.59591e-09	0	#N/A	4	Putative nepenthesin
MtrunA17_Chr5g0442921	Medtr5g091130	0	#N/A	0.766303	4.27866e-06	1.27864	3.89413e-16	0.448885	0.0111358	4	Putative nepenthesin
MtrunA17_Chr1g0185661	#N/A	0	#N/A	0.483472	0.0147021	1.33257	7.0063e-15	0	#N/A	4	Putative nepenthesin
MtrunA17_Chr4g0035111	Medtr4g070340	-0.666381	0.00638065	0.726708	0.00104231	1.26189	4.6241e-10	0.574619	0.0103829	4	Putative NmrA-like domain, NAD(P)-binding domain superfamily
MtrunA17_Chr3g0084191	Medtr3g019120	0	#N/A	1.13144	2.33962e-12	1.1621	2.34492e-13	0.633786	0.000185894	4	Putative non-specific protein-tyrosine kinase, NAD(P)H dehydrogenase (quinone)
MtrunA17_Chr1g0203251	Medtr1g101250	0	#N/A	0.989873	0.0126919	1.1366	0.000771311	0	#N/A	4	Putative non-specific serine/threonine protein kinase
MtrunA17_Chr2g0315131	Medtr2g075140	0	#N/A	0.769547	9.14843e-09	1.12514	2.64869e-18	0.800188	2.53802e-09	4	Putative non-specific serine/threonine protein kinase
MtrunA17_Chr3g0093881	Medtr3g041560	0	#N/A	0.980553	1.17101e-05	1.43883	9.73197e-12	0.743329	0.00108764	4	Putative non-specific serine/threonine protein kinase
MtrunA17_Chr6g0455851	Medtr6g016195	0	#N/A	1.08408	6.17237e-09	1.20942	1.88279e-11	0.68572	0.000367976	4	Putative non-specific serine/threonine protein kinase
MtrunA17_Chr6g0465131	#N/A	0	#N/A	1.08213	1.45697e-05	1.37315	1.75611e-09	0.786315	0.00116927	4	Putative non-specific serine/threonine protein kinase
MtrunA17_Chr7g0236661	#N/A	0	#N/A	1.06545	0.00558755	1.37816	3.22104e-05	1.42406	1.57014e-05	4	Putative non-specific serine/threonine protein kinase
MtrunA17_Chr6g0465231	Medtr6g038940	0	#N/A	0.802433	0.00110163	1.09066	1.5106e-06	0.791071	0.00095899	4	Putative non-specific serine/threonine protein kinase, Endo-polygalacturonase
MtrunA17_Chr2g0281901	Medtr2g013140	0	#N/A	0.587339	0.0125574	1.17824	1.25415e-08	0.62431	0.00573363	4	Putative nucleophile aminohydrolase
MtrunA17_Chr2g0317901	Medtr2g079670	0.683625	0.00480136	0.852974	8.97703e-05	1.02486	6.88817e-07	0.983137	3.46529e-06	4	Putative nucleophile aminohydrolase
MtrunA17_Chr6g0449041	Medtr6g004200	0.433992	0.0280638	1.23774	4.84557e-15	1.05707	1.52979e-11	0	#N/A	4	Putative oxalyl-CoA decarboxylase
MtrunA17_Chr5g0429651	Medtr5g070010	1.24863	0.00255532	0	#N/A	0.900226	0.0111945	0	#N/A	4	Putative oxidoreductase
MtrunA17_Chr8g0369391	Medtr8g071130	0	#N/A	1.49381	1.02262e-12	1.43328	3.67699e-12	0	#N/A	4	Putative oxidoreductase
MtrunA17_Chr8g0382691	Medtr8g091390	0	#N/A	0.494401	0.0388622	1.61592	1.31298e-15	0	#N/A	4	Putative oxidoreductase
MtrunA17_Chr4g0026771	#N/A	1.05141	0.0443423	0	#N/A	1.355	0.00181879	0	#N/A	4	Putative oxidoreductase
MtrunA17_Chr7g0256851	Medtr7g090630	0	#N/A	0	#N/A	1.09929	2.70578e-08	0	#N/A	4	Putative PAM2-containing protein CID1/CID2
MtrunA17_Chr4g0033861	Medtr4g068220	0	#N/A	1.44474	1.40065e-10	1.33652	1.36803e-09	0.539045	0.0327048	4	Putative PAMP-induced secreted peptide 1	MtPIP1	PAMP-induced Secreted Peptide
MtrunA17_Chr6g0460211	#N/A	0	#N/A	0	#N/A	1.05545	6.55724e-13	0	#N/A	4	Putative parvalbumin, EF-hand domain pair, calmodulin	MtCAM1	calmodulin 1 (AF494219)
MtrunA17_Chr5g0402441	Medtr5g017670	0.635951	0.0457434	1.19939	3.12418e-06	1.18164	1.53368e-06	0	#N/A	4	Putative patatin-like phospholipase domain, Acyl transferase/acyl hydrolase/lysophospholipase
MtrunA17_Chr4g0011771	Medtr4g025690	0	#N/A	1.2771	1.01367e-06	1.39851	3.04855e-08	1.25751	1.44452e-06	4	Putative pectinesterase
MtrunA17_Chr2g0330721	Medtr2g100560	0	#N/A	0	#N/A	1.05118	0.000248902	0	#N/A	4	Putative peptidase M20, bacterial exopeptidase dimerisation domain-containing protein	MtIAR31	auxin conjugate hydrolase
MtrunA17_Chr2g0285351	Medtr2g018590	0	#N/A	0.787128	1.23188e-05	1.4309	3.59551e-17	0.444774	0.0185518	4	Putative peptidase S10, serine carboxypeptidase, alpha/Beta hydrolase
MtrunA17_Chr3g0136611	Medtr3g105595	0	#N/A	0	#N/A	1.30507	1.20224e-05	-0.684405	0.0346958	4	Putative periplasmic binding protein-like I
MtrunA17_Chr1g0164891	Medtr1g038680	0.824934	0.000613868	0.686686	0.00261732	1.12344	3.12227e-08	0.683601	0.0015723	4	Putative peroxidase	MtPrx50	peroxidase
MtrunA17_Chr1g0194151	Medtr1g086320	0	#N/A	1.21279	0.000842564	2.67692	2.70718e-16	0	#N/A	4	Putative peroxidase	MtPrx65	peroxidase
MtrunA17_Chr2g0279041	Medtr2g008710	0.766437	0.00138767	0.511164	0.0346749	1.64059	1.36611e-15	0	#N/A	4	Putative peroxidase	MtPrx06	peroxidase
MtrunA17_Chr2g0292241	Medtr2g029820	0	#N/A	1.07609	2.0109e-10	1.14062	5.55902e-12	0.56958	0.001547	4	Putative peroxidase	MtRip7;MtPrx11;MtPRX3	peroxidase
MtrunA17_Chr2g0292271	Medtr2g029860	0	#N/A	1.19043	1.97524e-06	0.949523	0.000122363	1.08058	1.64204e-05	4	Putative peroxidase	MtPrx26	peroxidase
MtrunA17_Chr2g0320061	Medtr2g084020	0	#N/A	0	#N/A	1.00253	0.000447225	0.979481	0.000875813	4	Putative peroxidase	MtPrx28	peroxidase 28
MtrunA17_Chr4g0070951	Medtr4g125940	1.31041	2.58661e-12	0.488216	0.0173819	0.611985	0.00100776	0	#N/A	4	Putative peroxidase	MtPrx09	peroxidase 09
MtrunA17_Chr6g0467121	Medtr6g043240	1.02381	4.40984e-06	1.10484	1.20012e-07	1.13768	2.06496e-08	0.710717	0.00105224	4	Putative peroxidase	MtPrx48	peroxidase
MtrunA17_Chr7g0244451	Medtr7g072490	0	#N/A	0.67073	2.9874e-07	1.01848	3.16777e-16	0.525203	8.3764e-05	4	Putative peroxidase	MtPrx33	peroxidase
MtrunA17_Chr8g0343241	Medtr8g019290	0	#N/A	1.27667	0.000257411	1.24166	0.000153424	0	#N/A	4	Putative PGG domain-containing protein
MtrunA17_Chr5g0448361	Medtr5g098720	0	#N/A	1.49437	3.86111e-07	1.11752	0.000128189	0	#N/A	4	Putative phenylalanine ammonia-lyase	MtPAL1	phenylalanine ammonia lyase 1
MtrunA17_Chr1g0192371	Medtr1g083580	0	#N/A	0.960776	0.00504678	1.83159	4.35026e-09	0	#N/A	4	Putative phloem protein
MtrunA17_Chr1g0209141	Medtr1g109430	0	#N/A	1.02924	1.14766e-15	0.970452	2.14742e-14	0.368989	0.00974638	4	Putative phosphatidate phosphatase
MtrunA17_Chr3g0113521	Medtr3g070710	0	#N/A	0	#N/A	1.17516	2.13639e-06	0.553112	0.0491591	4	Putative phosphoinositide phospholipase C
MtrunA17_Chr3g0113531	Medtr3g070720	0	#N/A	0	#N/A	1.34812	1.34497e-10	0	#N/A	4	Putative phosphoinositide phospholipase C	MtPLC	phosphoinositide phospholipase C
MtrunA17_Chr1g0191411	Medtr1g082360	0	#N/A	0.84427	1.31613e-08	1.32896	9.03543e-21	0.483865	0.00219467	4	Putative phosphoric monoester hydrolase
MtrunA17_Chr2g0306461	Medtr0334s0010	0	#N/A	0.733813	1.39725e-09	1.25159	1.16445e-26	0.643464	1.54986e-07	4	Putative Phytocyanin domain, cupredoxin	MtPCY30	Plantacyanin/Chemocyanin
MtrunA17_Chr2g0317231	Medtr2g079050	0	#N/A	0	#N/A	1.27797	9.52965e-06	0	#N/A	4	Putative Phytocyanin domain, cupredoxin	MtENODL6;MtPCY55	ENOD-like 6;Plantacyanin/Chemocyanin
MtrunA17_Chr4g0020501	Medtr0005s0200	0	#N/A	0.510057	0.000593753	1.05521	2.49379e-15	0	#N/A	4	Putative P-loop containing nucleoside triphosphate hydrolase, leucine-rich repeat domain superfamily
MtrunA17_Chr3g0082891	Medtr3g015560	0	#N/A	0	#N/A	1.00919	7.0987e-11	0.559918	0.000987093	4	Putative P-loop containing nucleoside triphosphate hydrolase, leucine-rich repeat domain superfamily
MtrunA17_Chr3g0084081	Medtr3g019040	0	#N/A	0.68075	7.47528e-05	1.08428	3.38278e-12	0	#N/A	4	Putative P-loop containing nucleoside triphosphate hydrolase, leucine-rich repeat domain superfamily
MtrunA17_Chr1g0151661	Medtr1g016480	0	#N/A	0	#N/A	1.02641	6.23848e-06	0.648966	0.00830808	4	Putative polyketide cyclase/dehydrase, START-like domain superfamily
MtrunA17_Chr3g0114121	Medtr3g071740	0.964784	6.38519e-05	0.646981	0.00794971	1.47014	7.89693e-12	0	#N/A	4	Putative polyketide cyclase/dehydrase, START-like domain superfamily
MtrunA17_Chr5g0437611	Medtr5g083270	0.748923	4.52855e-05	0.745993	1.68252e-05	1.40581	4.50956e-18	0.384026	0.0406108	4	Putative polyketide cyclase/dehydrase, START-like domain superfamily
MtrunA17_Chr5g0402901	Medtr5g018365	0.572313	0.0350384	1.39884	3.83214e-10	1.67698	1.68907e-14	0	#N/A	4	Putative polyneuridine-aldehyde esterase
MtrunA17_Chr7g0216931	Medtr7g009780	0	#N/A	0.862274	0.00029113	1.11575	5.46846e-07	0	#N/A	4	Putative polyvinyl alcohol dehydrogenase (cytochrome)
MtrunA17_Chr7g0216961	Medtr7g009820	0	#N/A	1.22306	8.90677e-15	1.2568	5.92886e-16	0.657515	7.05194e-05	4	Putative polyvinyl alcohol dehydrogenase (cytochrome)
MtrunA17_Chr7g0275581	Medtr7g117310	0	#N/A	1.09002	2.7246e-14	1.58127	3.12603e-29	0.664581	7.54402e-06	4	Putative potassium channel, voltage-dependent, EAG/ELK/ERG, rmlC-like jelly roll	MtCNGCIb	cyclic nucleotide-gated channel
MtrunA17_Chr2g0284361	Medtr2g016800	0	#N/A	0	#N/A	1.23733	2.83204e-08	0	#N/A	4	Putative precursor of CEP13/CEP14	MtCEP17	C-terminally encoded peptide
MtrunA17_Chr6g0456391	Medtr6g016640	0	#N/A	1.1198	0.00024373	1.53208	7.47018e-08	0	#N/A	4	Putative proline dehydrogenase
MtrunA17_Chr6g0456381	Medtr6g016640	0	#N/A	0	#N/A	1.43867	2.92152e-06	0	#N/A	4	Putative proline dehydrogenase
MtrunA17_Chr6g0456401	Medtr6g016650	0	#N/A	0.833503	0.00562975	1.47993	4.69187e-08	0	#N/A	4	Putative proline dehydrogenase
MtrunA17_Chr4g0020231	Medtr0003s0580	0	#N/A	0	#N/A	1.18899	3.32427e-10	0	#N/A	4	putative protein
MtrunA17_Chr1g0153961	Medtr1g021070	0	#N/A	0.761107	5.94628e-06	1.37796	3.16893e-18	0	#N/A	4	putative protein
MtrunA17_Chr1g0157191	Medtr1g026110	0	#N/A	0.6845	8.88288e-07	1.22535	1.07885e-20	0.390134	0.00838505	4	putative protein
MtrunA17_Chr1g0160291	Medtr1g030740	0	#N/A	1.30847	1.40541e-11	0.716375	0.000294277	0	#N/A	4	putative protein
MtrunA17_Chr1g0195011	Medtr1g087710	0	#N/A	0	#N/A	1.21436	0.00128159	0	#N/A	4	putative protein
MtrunA17_Chr1g0201811	Medtr1g098700	0	#N/A	0	#N/A	1.19646	4.97138e-16	0	#N/A	4	putative protein
MtrunA17_Chr1g0203341	Medtr1g100623	0	#N/A	0	#N/A	1.66742	1.87584e-13	0	#N/A	4	putative protein
MtrunA17_Chr1g0208621	Medtr1g108640	0	#N/A	0	#N/A	1.59854	4.52996e-12	0	#N/A	4	putative protein
MtrunA17_Chr1g0209831	Medtr1g110820	0	#N/A	0.679159	0.000571356	1.05113	6.03148e-09	0	#N/A	4	putative protein	MtCLE03	CLAVATA3/Endosperm Surrounding Region-related (CLE) family
MtrunA17_Chr2g0323671	Medtr2g089945	0	#N/A	1.11515	0.000396223	1.47064	5.86884e-07	1.47349	9.24323e-07	4	putative protein
MtrunA17_Chr3g0109341	Medtr3g063950	0	#N/A	0	#N/A	1.05526	1.22244e-08	0.75918	9.75118e-05	4	putative protein
MtrunA17_Chr3g0111521	Medtr3g067730	0.775074	0.0039074	0.90764	7.76519e-05	1.07904	5.35839e-08	1.17555	4.36549e-10	4	putative protein
MtrunA17_Chr3g0133621	Medtr3g101320	0	#N/A	0.801407	1.31951e-08	1.00313	1.35757e-13	0	#N/A	4	putative protein
MtrunA17_Chr3g0135901	Medtr3g104640	0.477285	0.00143972	0.830418	1.24242e-10	1.16042	1.11681e-20	0.467542	0.000566607	4	putative protein
MtrunA17_Chr3g0142751	Medtr3g114010	0	#N/A	0.381911	0.0059336	1.23779	6.54648e-25	0.44031	0.000821848	4	putative protein
MtrunA17_Chr3g0143431	Medtr3g114750	0.667672	0.00924635	1.45335	9.8786e-12	2.31548	2.91902e-28	0	#N/A	4	putative protein
MtrunA17_Chr3g0144171	Medtr3g115940	0	#N/A	1.27386	0.00219569	1.16945	0.0030798	0	#N/A	4	putative protein
MtrunA17_Chr4g0006251	Medtr4g015650	0	#N/A	0	#N/A	1.23986	1.51658e-07	0	#N/A	4	putative protein
MtrunA17_Chr4g0010861	Medtr4g023550	0	#N/A	0	#N/A	1.91352	7.2225e-08	0	#N/A	4	putative protein
MtrunA17_Chr4g0022111	Medtr4g044297	0	#N/A	0	#N/A	1.07436	1.78859e-10	0.613575	0.000652898	4	putative protein
MtrunA17_Chr4g0034241	Medtr4g068770	0	#N/A	1.23752	1.01782e-10	1.23144	5.52815e-11	0	#N/A	4	putative protein
MtrunA17_Chr4g0047221	Medtr4g088760	0	#N/A	0	#N/A	1.86641	2.5827e-07	0	#N/A	4	putative protein
MtrunA17_Chr4g0056901	Medtr4g102220	0	#N/A	0	#N/A	1.28522	4.76794e-06	0	#N/A	4	putative protein
MtrunA17_Chr4g0072541	Medtr4g128470	0	#N/A	0.490752	0.0303482	1.00708	1.39546e-07	0	#N/A	4	putative protein
MtrunA17_Chr5g0413521	Medtr5g034230	0	#N/A	0.859142	5.49174e-05	1.33418	1.93436e-11	0.518265	0.0199372	4	putative protein
MtrunA17_Chr5g0414371	Medtr5g035665	0	#N/A	0.42191	0.0166846	1.09347	3.42628e-13	0.692246	1.10984e-05	4	putative protein
MtrunA17_Chr5g0414461	Medtr5g035760	0.816925	0.0224837	0.86626	0.012376	1.28446	5.34856e-05	0	#N/A	4	putative protein
MtrunA17_Chr7g0242071	Medtr7g067940	0	#N/A	0	#N/A	1.34146	1.9247e-08	0.626481	0.0165793	4	putative protein
MtrunA17_Chr7g0269181	Medtr7g108650	0	#N/A	0	#N/A	2.59888	4.68566e-11	0	#N/A	4	putative protein
MtrunA17_Chr8g0348621	Medtr8g028875	0	#N/A	1.23845	1.27324e-22	1.34736	2.94219e-27	0.716134	3.56468e-08	4	putative protein
MtrunA17_Chr8g0385111	Medtr8g095080	0	#N/A	0.870131	2.67069e-11	1.23222	2.71405e-22	0	#N/A	4	putative protein
MtrunA17_Chr2g0298551	#N/A	0	#N/A	0.798866	2.21511e-07	1.5138	7.48958e-25	0.830364	5.95048e-08	4	putative protein
MtrunA17_Chr4g0066491	Medtr4g118480	0.453034	0.0426539	1.33652	1.51511e-14	1.72567	1.95559e-24	0	#N/A	4	Putative protein DMP
MtrunA17_Chr0c01g0489261	#N/A	0	#N/A	0	#N/A	1.55491	1.69709e-09	0	#N/A	4	Putative protein IDA	MtIDA20	Inflorescence Deficient in Abscission
MtrunA17_Chr8g0346081	Medtr8g024600	0	#N/A	0	#N/A	1.57583	2.57028e-12	0	#N/A	4	Putative protein kinase CAMK-CAMKL-CHK1 family
MtrunA17_Chr3g0113601	Medtr3g070800	0	#N/A	1.00058	3.30018e-06	1.60702	2.60779e-15	0.587136	0.0103631	4	Putative protein kinase RLK-Pelle-CR4L family
MtrunA17_Chr7g0219671	Medtr7g015390	0	#N/A	1.20357	0.00213039	1.50815	2.24701e-05	0	#N/A	4	Putative protein kinase RLK-Pelle-CrRLK1L-1 family	MtRPK	receptor protein kinase (CA919558)
MtrunA17_Chr1g0206361	Medtr1g105655	0	#N/A	1.02129	2.2236e-05	1.57136	3.86605e-12	0	#N/A	4	Putative protein kinase RLK-Pelle-DLSV family
MtrunA17_Chr1g0206531	Medtr1g105820	0	#N/A	0.719661	3.45144e-05	1.1295	3.55724e-12	0.503922	0.00489904	4	Putative protein kinase RLK-Pelle-DLSV family
MtrunA17_Chr2g0280691	Medtr2g011160	0	#N/A	0.972054	1.67553e-10	1.2751	7.46555e-18	0.451398	0.00630562	4	Putative protein kinase RLK-Pelle-DLSV family
MtrunA17_Chr2g0281971	Medtr2g013210	0	#N/A	0.508736	0.000503528	1.1568	1.87214e-18	0	#N/A	4	Putative protein kinase RLK-Pelle-DLSV family
MtrunA17_Chr2g0312571	Medtr2g064930	0.640189	0.0153581	0.762745	0.00101021	1.9528	6.91979e-21	0.620801	0.00672212	4	Putative protein kinase RLK-Pelle-DLSV family
MtrunA17_Chr2g0314841	Medtr2g073540	0.54436	0.0184874	0	#N/A	1.08068	8.22956e-09	0	#N/A	4	Putative protein kinase RLK-Pelle-DLSV family
MtrunA17_Chr3g0081031	Medtr3g011910	0	#N/A	0.975492	8.72677e-11	1.50558	6.54143e-25	1.12757	7.34246e-14	4	Putative protein kinase RLK-Pelle-DLSV family
[truncated: 239 more rows]

## Sheet: Supplementary Material 2
Supplementary Material 2: Metabolomic analysis of control (C) and P. oligandrum inoculated (Po) seedlings of M. truncatula (A17 accession). Root were collected from Control (C) or Pythium oligandrum (Po) inoculated plants at three timepoints (3,7,14 dpi) and a biophasic metabolomic extraction was applied on roots. Quality Control (QC) were prepared by pooling all samples.The extracted metabolites…
MScleanRcluster	ion linkage	selected_feature	Top-50 plsda	Id	SMILES	Phylogeny_level	InChI Code	InChI Key	Molecular Formula	CpdOntology_Class	CpdOntology_Subclass	PathwayNP	Annotation level	MSfinderscore	MS/MSDot product	orthogonal data	DBidentifier	MS.MS.spectrum	Adduct	rtmin	m/z	QC.1	QC.2	QC.3	C1-3dpi	C2-3dpi	C3-3dpi	C4-3dpi	C5-3dpi	Po1-3dpi	Po2-3dpi	Po3-3dpi	Po4-3dpi	Po5-3dpi	C1-7dpi	C2-7dpi	C3-7dpi	C4-7dpi	C5-7dpi	Po1-7dpi	Po2-7dpi	Po3-7dpi	Po4-7dpi	Po5-7dpi	C1-14dpi	C2-14dpi	C3-14dpi	C4-14dpi	C5-14dpi
432	61	neg_300	C	(1R,2R,3R,4R,5S,6R)-6-{[(2R,3R,4S,5R,6R)-3,4,5-trihydroxy-6-(hydroxymethyl)oxan-2-yl]oxy}cyclohexane-1,2,3,4,5-pentol	OCC1OC(OC2C(O)C(O)C(O)C(O)C2O)C(O)C(O)C1O	genus	InChI=1S/C12H22O11/c13-1-2-3(14)4(15)10(21)12(22-2)23-11-8(19)6(17)5(16)7(18)9(11)20/h2-21H,1H2	VCWMRQDBPZKXKG-UHFFFAOYSA-N	C12H22O11	Polyols	Cyclitols	Carbohydrates	3	7.2289		genus_1a	chebi:17505|hmdb:HMDB05826|plantcyc:CPD-458|kegg glycan:G10488|kegg ligand:C01235|metabolights:MTBLC17505|pubchem cid:25202439	50.31755:11040 55.01825:15972 57.03394:40840 58.00545:189162 59.01331:1183256 60.0167:36483 66.86359:104079 70.60513:10310 71.01355:1458036 72.01703:60244 72.99285:190864 73.02918:26848 75.00867:19354 83.01379:40380 85.02451:17277 85.02952:214847 85.03457:20713 85.85399:10122 86.03294:14527 87.0087:108648 87.88219:11381 89.02448:1616225 89.74431:10178 90.02785:54881 95.01405:93405 97.02931:10844 …	[M-H]-	1.1	341.1087	25.4839	26.5877	27.3731	12.8125	3.5703	8.9595	10.0646	3.3327	8.9967	3.503	3.6016	24.5914	0.6162	41.7681	88.6492	46.3638	44.3036	64.5006	56.3427	45.2669	105.3536	24.4877	37.536	39.8948	68.3184	38.891	29.6377	63.7251
58	1	neg_329	C	6-[3-(carboxymethyl)-2,6-dihydroxyphenoxy]-3,4,5-trihydroxyoxane-2-carboxylic acid	OC1C(O)C(Oc2c(O)c(CC(O)=O)ccc2O)OC(C1O)C(O)=O	generic	InChI=1S/C14H16O11/c15-5-2-1-4(3-6(16)17)7(18)11(5)24-14-10(21)8(19)9(20)12(25-14)13(22)23/h1-2,8-10,12,14-15,18-21H,3H2,(H,16,17)(H,22,23)	PDFODIWYTWLVFU-UHFFFAOYSA-N	C14H16O11	Phenolic glycosides	Phenolic glycosides	Shikimates and Phenylpropanoids	3	6.51		generic_?	HMDB=HMDB0130463	54.04111:1712 57.034:9980 57.25697:1797 59.23442:1716 62.7944:1685 65.00282:11632 67.01854:5512 68.06674:3721 68.07008:5393 68.99786:11190 71.0135:4500 81.03449:5704 83.01377:53628 84.81754:2009 85.02988:1890 91.01855:2226 107.01362:8527 109.02916:23011 110.03254:1870 111.00819:2985 120.51408:2064 125.02398:124811 126.02748:8305 126.22115:1734 133.01607:2174 134.04691:3471 149.02397:7482 151.0032…	[M-H]-	2.683	359.06219	6.6799	6.6899	6.6526	4.7107	5.1943	5.4168	5.0944	6.0167	3.2098	6.7304	3.7562	6.0624	6.5307	5.8206	6.4801	5.9545	8.9592	5.1945	11.9809	11.9151	3.1099	4.5409	9.9642	9.1458	10.6436	8.729	22.2143	14.9805
70	1	neg_372	C	2-Methylbutanoic acid; [?-L-Arabinopyranosyl-(1?6)-?-D-glucopyranosyl] ester	CCC(C)C(=O)OC1OC(COC2OCC(O)C(O)C2O)C(O)C(O)C1O	family	InChI=1S/C16H28O11/c1-3-6(2)14(23)27-16-13(22)11(20)10(19)8(26-16)5-25-15-12(21)9(18)7(17)4-24-15/h6-13,15-22H,3-5H2,1-2H3	GQFJRCIBYXHCSJ-UHFFFAOYSA-N	C16H28O11	Fatty acyl glycosides	Fatty acyl glycosides	Unknown	3	5.8043		family_1a	dnp:LLV44	55.01829:2311 57.03402:186158 58.0373:7762 59.01332:147213 60.01665:6284 67.85278:3995 67.85634:6193 71.01354:43301 72.99326:3192 73.02932:13471 83.01389:7522 85.02934:16842 89.02449:6655 96.95996:9333 99.00865:6459 99.04507:119125 100.04842:8679 101.02422:59800 102.02776:3127 113.02402:16712 125.024:47129 125.03256:4383 138.48349:2244 143.03439:4934 156.14207:2491 159.02914:4018 161.04521:17325 …	[M-H]-	3.985	395.15585	4.3617	4.6202	4.0316	5.8924	3.5416	5.2878	5.7349	5.5194	5.3412	8.0902	5.2723	6.9905	9.0547	5.3093	3.9016	5.035	6.0172	5.4499	5.1715	4.6602	4.2811	5.0465	5.1436	2.1935	4.9435	1.2498	2.3762	2.5465
98	1	neg_49	C	C00050417	OCC(O)C(O)CC(=O)C=O	generic	InChI=1S/C6H10O5/c7-2-4(9)1-5(10)6(11)3-8/h2,5-6,8,10-11H,1,3H2	ZGCHLOWZNKRZSN-UHFFFAOYSA-N	C6H10O5	Saccharides	Monosaccharides	Carbohydrates	3	6.2769		generic_?	KNApSAcK=C00050417,ChEBI=CHEBI:60777,BLEXP=BLEXPDB00000114839	57.03401:488734 58.0373:20083 59.0133:112465 61.98798:25824 63.53222:7506 67.87213:24118 75.00292:24187 96.95954:9058 99.04508:399329 100.04865:16796 101.02425:114473 115.92005:34868 116.78956:8705 118.99266:55823 153.80196:8295 160.84189:74551 160.89194:49192 161.04539:80323 161.89337:37481 162.83891:102558 162.89301:101127	[M-H]-	2.151	161.04517	6.0533	6.006	5.6797	13.3147	9.1073	10.1124	14.1456	11.8169	12.0624	10.8527	16.0133	7.3397	14.5278	5.2186	6.4132	6.8022	8.2975	7.1448	5.0675	4.4714	3.7135	5.4166	4.9745	1.6442	1.1483	1.4929	1.7744	1.3857
251	2	neg_562	C	6-{5-[6-(3,4-dihydroxy-6-methyl-5-oxooxan-2-yl)-5,7-dihydroxy-4-oxo-4H-chromen-2-yl]-2-hydroxyphenoxy}-3,4,5-trihydroxyoxane-2-carboxylic acid	CC1OC(C(O)C(O)C1=O)c2c(O)cc3oc(cc(=O)c3c2O)-c4cc(OC5OC(C(O)C(O)C5O)C(O)=O)c(O)cc4	generic	InChI=1S/C27H26O16/c1-7-17(31)19(33)21(35)24(40-7)16-11(30)6-14-15(18(16)32)10(29)5-12(41-14)8-2-3-9(28)13(4-8)42-27-23(37)20(34)22(36)25(43-27)26(38)39/h2-7,19-25,27-28,30,32-37H,1H3,(H,38,39)	MEQDTVRIGGWFFQ-UHFFFAOYSA-N	C27H26O16	Flavonoids	Flavones	Shikimates and Phenylpropanoids	3	6.8755		generic_?	HMDB=HMDB0127317	55.01824:4890 57.03403:33731 58.00547:15391 59.01332:77111 59.33202:4794 67.01465:32791 67.01862:7498 68.56874:4084 68.99781:10935 69.0344:4959 69.93381:3903 71.01356:313578 72.01684:7956 72.99288:240541 73.02917:22161 75.00854:123547 83.01375:40084 85.0295:253624 85.28535:4382 86.03261:9097 87.00879:70786 89.02452:34031 91.01917:8485 95.01384:63843 97.02939:9146 99.00869:96344 100.01201:4947 100…	[M-H]-	4.922	605.11554	6.7637	6.9328	6.8546	10.5209	8.2005	10.5562	10.4697	8.1498	7.1681	13.5954	10.2212	7.3699	9.5075	6.8408	9.2856	10.8449	16.3215	8.1417	8.5391	6.2001	5.185	7.2063	5.5243	3.9874	7.514	6.888	6.0681	6.3986
385	7	neg_576	C	Apigenin 7-glucuronosyl-(1->2)-glucuronide	OC1C(O)C(OC2C(O)C(O)C(OC2Oc3cc(O)c4c(=O)cc(oc4c3)-c5ccc(O)cc5)C(O)=O)OC(C1O)C(O)=O	generic	InChI=1S/C27H26O17/c28-9-3-1-8(2-4-9)13-7-12(30)15-11(29)5-10(6-14(15)41-13)40-27-23(19(34)18(33)22(43-27)25(38)39)44-26-20(35)16(31)17(32)21(42-26)24(36)37/h1-7,16-23,26-29,31-35H,(H,36,37)(H,38,39)	SJFTVAAHLRFBST-UHFFFAOYSA-N	C27H26O17	Flavonoids	Flavones	Shikimates and Phenylpropanoids	3	7.6166		generic_?	KNApSAcK=C00004161;C00035270,FooDB=FDB000152,NANPDB=NANPDB_1855,LipidMAPS=LMPK12110359,UNPD=UNPD192086;UNPD71954,COCONUT=CNP0192149	55.01842:1402 57.03394:4899 58.00552:2086 58.08916:1113 59.01325:10707 61.98801:1835 65.00282:1622 65.8223:1151 67.01834:1951 68.49014:2451 68.49373:1727 71.01355:56560 72.01704:1486 72.99285:38278 73.02928:3373 75.00855:24014 83.01378:6098 84.02149:1955 85.0295:43042 86.03259:1815 87.00867:10108 89.02446:8310 95.01382:8732 96.0173:1121 99.00881:17143 101.0242:6907 103.0036:10448 107.01294:1984 1…	[M-H]-	5.619	621.11017	5.4543	5.452	5.4751	4.7689	4.652	4.8919	3.9488	4.4305	3.1474	6.0401	4.9105	4.4302	2.9945	5.2702	5.1519	5.233	10.3812	3.5192	4.1002	2.8616	2.4558	4.8939	3.1596	6.2732	8.1025	13.5181	8.0717	10.1303
181	22	neg_721	C	2,3,16,21,23-Pentahydroxy-12-oleanen-28-oic acid; 28?21 Lactone, 3-O-[?-D-glucopyranosyl-(1?2)-?-D-glucopyranoside]	CC1(C)CC2C3=CCC4C5(C)CC(O)C(OC6OC(CO)C(O)C(O)C6OC7OC(CO)C(O)C(O)C7O)C(C)(CO)C5CCC4(C)C3(C)CC(O)C82CC1OC8=O	family	InChI=1S/C42H66O16/c1-37(2)11-19-18-7-8-24-38(3)12-20(46)33(58-35-32(30(51)28(49)22(16-44)55-35)57-34-31(52)29(50)27(48)21(15-43)54-34)39(4,17-45)23(38)9-10-40(24,5)41(18,6)13-25(47)42(19)14-26(37)56-36(42)53/h7,19-35,43-52H,8-17H2,1-6H3	CCTBIOAPVCAICB-UHFFFAOYSA-N	C42H66O16	Triterpenoids	Oleae triterpenoids	Terpenoids	3	6.2793		family_1a	dnp:HPD51	58.00527:59093 59.01333:326664 68.3336:73487 71.01353:1092782 71.85534:28377 72.99282:83540 83.01373:35076 85.02949:1241152 86.03288:48480 87.00868:67261 89.02443:400732 95.0139:556531 101.02422:127319 112.0162:39090 113.02402:2414188 114.02736:161194 115.77285:32265 119.03451:107003 143.03438:114874 161.04501:551603 162.04855:35646 179.05569:205387 182.73582:36500 250.44508:31276 293.18814:36600…	[M-H]-	9.01	825.42865	19.6588	18.8796	18.3076	16.9024	24.5154	24.4441	24.0313	12.6391	25.7458	20.4131	19.2182	33.1081	21.0327	27.4205	24.9813	24.6104	20.8122	22.1573	19.2702	16.9285	20.2891	17.4344	23.1115	26.2008	22.0477	21.8318	20.9669	25.9186
285	22	neg_776	C	3-Rha(1-2)Gal(1-2)GluA-Soyasaponenol B (NMR)	CC1OC(OC2C(O)C(O)C(CO)OC2OC3C(O)C(O)C(OC3OC4CCC5(C)C(CCC6(C)C5CC=C7C8CC(C)(C)CC(O)C8(C)CCC76C)C4(C)CO)C(O)=O)C(O)C(O)C1O	Unknown	InChI=1S/C48H78O18/c1-21-29(52)31(54)35(58)40(61-21)65-37-32(55)30(53)24(19-49)62-41(37)66-38-34(57)33(56)36(39(59)60)64-42(38)63-28-12-13-45(5)25(46(28,6)20-50)11-14-48(8)26(45)10-9-22-23-17-43(2,3)18-27(51)44(23,4)15-16-47(22,48)7/h9,21,23-38,40-42,49-58H,10-20H2,1-8H3,(H,59,60)	PTDAHAWQAGSZDD-UHFFFAOYSA-N	C48H78O18	Triterpenoids	Oleae triterpenoids	Terpenoids	2		86.3	generic_?	Unknown	68.99786:51914 71.01353:842843 72.9929:124765 73.02932:123072 75.0085:297250 83.01374:75119 85.02945:535850 86.00079:42845 87.0088:243486 87.04546:29849 88.01169:22766 89.02446:203261 95.01371:124878 97.02981:24730 97.37366:45734 99.00869:338333 99.88821:20755 101.02418:296874 103.03979:70640 112.01601:37081 113.02409:361826 115.03973:35316 119.03429:63790 125.02461:20650 131.03447:129467 134.864…	[M-H]-	9.255	941.5119	33.8285	33.5902	32.8233	55.0395	58.2563	60.9734	56.8366	54.9694	52.8482	66.0722	46.9318	90.2867	60.9993	42.2402	36.4672	42.0416	40.2028	46.566	45.1479	35.2075	46.6235	45.8059	43.4742	20.1739	28.7401	11.4175	13.9733	16.6316
371	43	neg_78	C	2-hydroxy-2-(1,2,3-trihydroxypropyl)propanedioate	OCC(O)C(O)C(O)(C([O-])=O)C([O-])=O	genus	InChI=1S/C6H10O8/c7-1-2(8)3(9)6(14,4(10)11)5(12)13/h2-3,7-9,14H,1H2,(H,10,11)(H,12,13)/p-2	CQIRJDZGDXTXKF-UHFFFAOYSA-L	C6H8O8	Saccharides	Monosaccharides	Carbohydrates	3	7.0549		genus_1a	plantcyc:CPD-13912|pubchem cid:90657336	57.03401:664706 67.01862:227811 67.06487:325998 72.42132:41494 85.02946:2463684 86.03287:160887 87.00879:4403122 88.01221:161755 97.44054:42155 103.04058:52295 111.00832:8838439 112.01177:502093 113.01329:54957 120.43075:41749 129.01881:469143 147.02919:50603 154.99892:51853 171.03276:49913 173.00848:141789 191.0195:1121492 192.02316:66155	[M-H2O-H]-	1.614	191.01936	201.504	208.523	210.8942	106.6117	108.6571	133.1694	90.039	112.0224	122.2564	169.3065	246.9	74.5785	188.1921	82.1161	90.0098	70.8528	99.4919	72.3378	111.5526	82.1306	95.7311	94.6505	143.1239	247.6529	131.6317	275.6414	239.2866	221.8209
194	1	neg_821	C	3-GluA-28-Xyl(1-4)Rha(1-2)Ara Medicagenic acid	CC1OC(OC2C(O)C(O)COC2OC(=O)C34CCC(C)(C)CC4C5=CCC6C7(C)CC(O)C(OC8OC(C(O)C(O)C8O)C(O)=O)C(C)(C7CCC6(C)C5(C)CC3)C(O)=O)C(O)C(O)C1OC9OCC(O)C(O)C9O	Unknown	InChI=1S/C52H80O24/c1-20-36(72-41-33(61)28(56)24(54)18-69-41)32(60)35(63)42(71-20)74-38-29(57)25(55)19-70-44(38)76-46(68)52-14-12-47(2,3)16-22(52)21-8-9-26-48(4)17-23(53)39(75-43-34(62)30(58)31(59)37(73-43)40(64)65)51(7,45(66)67)27(48)10-11-50(26,6)49(21,5)13-15-52/h8,20,22-39,41-44,53-63H,9-19H2,1-7H3,(H,64,65)(H,66,67)	RPWKGRUCXRZSSG-UHFFFAOYSA-N	C52H80O24	Triterpenoids	Oleae triterpenoids	Terpenoids	2		95.7	?_?	Unknown	80.07539:2107 83.01399:12158 84.02164:5026 85.02951:207878 86.03274:9649 87.00879:13416 87.924:2692 89.02448:46864 90.02792:2335 95.01388:41987 96.01751:3131 99.00907:15167 101.02424:91111 101.3934:2594 103.00352:68718 103.0399:3562 110.00304:2512 113.02402:270612 114.01998:2224 114.02701:14967 115.00353:3692 129.01892:22399 131.03453:40343 133.01379:24446 157.01393:16691 159.01926:2464 163.02446…	[M-H]-	7.669	1087.4989	2.0883	2.1024	2.1225	4.1417	0.9349	1.7656	2.6127	1.8225	2.3292	3.7219	1.7229	6.8129	5.7048	4.5025	0.8093	1.3243	2.0842	1.5036	2.0228	1.4437	2.7755	1.3876	2.2567	3.082	3.5479	0.538	0.6739	0.6596
270	2	pos_1451	C	Unknown		Unknown	Unknown	Unknown	Unknown	Unknown	Unknown	Unknown	4			?_?	Unknown	55.01817:2285 55.0544:9865 56.04969:66159 57.06999:1665 59.06044:2183 64.83318:1735 65.0385:2081 67.05416:13259 69.03353:13928 69.06987:4561 70.06541:1987 79.05416:6423 81.03344:13064 81.06982:15560 82.06502:15731 83.04906:2696 83.08537:3897 84.08074:1986625 85.02834:17329 85.07803:6102 85.08398:107711 91.05383:8821 93.06991:15354 95.08545:21225 96.08078:6742 97.02822:13968 97.3766:3039 98.09619:…	[M+H]+	8.496	790.47235	1.3034	1.3027	1.4151	1.8452	3.0365	4.5954	3.6327	2.6787	4.0292	2.393	5.4867	1.3867	3.0448	5.5341	2.684	4.6267	3.6451	5.2938	1.2088	1.6617	2.1829	2.9806	1.6392	1.1862	1.394	0.2546	0.465	0.4896
278	2	pos_1488	C	Unknown		Unknown	Unknown	Unknown	Unknown	Unknown	Unknown	Unknown	4			?_?	Unknown	65.0385:15536 66.73021:11927 66.73301:133257 67.04172:25978 67.05429:38454 69.03356:31394 69.07011:15687 69.14675:12354 70.06512:37890 79.05428:100496 79.27424:11362 80.04944:28759 80.05755:14025 81.03355:56530 81.06993:737272 82.06513:411852 82.07314:34140 83.04916:21609 83.0685:22208 83.08553:399480 84.08082:3515402 85.0283:39298 85.07912:20852 85.0841:158935 91.05427:31879 92.04869:13406 93.06…	[M+H]+	8.859	834.4621	2.986	3.2695	3.0513	6.4736	4.4273	8.1027	5.8692	4.2061	6.0686	3.7207	6.6746	1.9071	3.9088	9.3397	5.9433	10.0323	6.9507	9.4546	3.2212	3.6165	3.5064	4.5646	2.2725	1.4622	1.4475	0.3527	0.4645	0.6764
327	2	pos_315	C	2-(acetylamino)-1,5-anhydro-2-deoxy-4-O-b-D-galactopyranosyl-D-arabino-Hex-1-enitol	CC(=O)NC1=COC(CO)C(OC2OC(CO)C(O)C(O)C2O)C1O	generic	InChI=1S/C14H23NO10/c1-5(18)15-6-4-23-8(3-17)13(9(6)19)25-14-12(22)11(21)10(20)7(2-16)24-14/h4,7-14,16-17,19-22H,2-3H2,1H3,(H,15,18)	MIDRXTGJGROJRO-UHFFFAOYSA-N	C14H23NO10	O-glycosyl compounds	O-glycosyl compounds	Carbohydrates	3	7.2573		generic_?	HMDB=HMDB0002282,FooDB=FDB022945,BMDB=BMDB02282,COCONUT=CNP0131945	50.51855:16296 50.65734:14485 51.79994:17256 55.01797:19400 55.32673:16505 56.04978:89085 64.6624:15266 64.73716:19355 65.02897:15460 68.04965:40820 68.3305:32063 68.33389:46685 69.03356:255486 70.037:15137 70.06516:83353 71.04906:50722 74.00591:32461 74.02393:17169 74.06007:42248 76.40981:15192 78.99692:16517 81.76212:16815 84.04445:37130 84.08062:23805 85.02818:27051 86.06004:1126648 87.04407:4…	[M-C6H8O6+H]+	1.122	190.10736	2.9889	2.8628	2.9726	1.9403	1.1383	1.4705	1.9588	1.9017	0.9019	1.3118	1.2098	1.0174	0.962	3.5779	6.1769	6.1151	6.461	6.3034	4.4986	3.8689	2.488	1.9254	3.9966	3.7766	8.6046	7.3292	6.8404	7.1488
390	2	pos_320	C	Unknown		Unknown	Unknown	Unknown	Unknown	Unknown	Unknown	Unknown	4			?_?	Unknown	52.43164:5234 53.00214:5271 55.05457:11479 56.04972:14031 56.96503:14104 68.04966:10618 68.50781:14192 70.06522:2218950 71.06229:12856 71.06855:105065 71.0723:4379 72.08086:26396 79.05426:30503 80.04949:435642 80.94509:11133 81.0528:25869 81.07008:8407 82.06532:11537 84.08076:25357 84.95964:55116 93.0697:14256 94.06509:91956 96.08074:12887 98.09648:234027 98.9556:6153 99.09988:19708 103.05387:531…	[M+NH4]+	4.174	191.1544	2.6069	2.374	2.5058	1.4657	0.9752	0.9539	1.5263	1.2384	0.8184	1.0246	1.3268	0.5134	0.8283	3.5897	5.6432	6.5249	6.2066	8.1151	4.2355	4.0059	2.1021	2.7903	3.3903	1.8174	6.8434	3.9543	5.2763	2.7683
341	3	pos_616	C	Unknown		Unknown	Unknown	Unknown	Unknown	Unknown	Unknown	Unknown	4			?_?	Unknown	55.01799:7612 55.05448:6899 56.04972:2026 56.95108:1054 56.96496:4900 57.06999:2040 64.81998:1217 66.58648:1173 67.05443:3345 67.25932:1093 67.77525:4621 68.04955:4756 69.0699:4534 70.06519:37786 71.06872:2451 72.04409:1908 72.07713:1664 72.08083:25160 73.06474:3367 73.08398:1260 79.05421:1852 80.04951:3004 81.06999:2939 82.02869:3342 82.06506:2521 83.0127:39625 83.08554:2798 84.04442:41847 84.08…	[M+H]+	3.089	281.18616	0.9894	1.0342	0.9818	0.0803	0.0471	0.054	0.0808	0.0658	0.0341	0.0738	0.0699	0.0285	0.0419	0.4168	0.5834	0.6921	0.7052	0.7674	0.5704	0.4557	0.2182	0.3492	0.4582	1.2648	4.1266	2.5201	3.6544	2.6034
349	8	pos_751	C	Daryamide F	CCCC=CC=CC(=O)NC1=CC(O)(CCC(N)=O)C2OC2C1O	generic	InChI=1S/C17H24N2O5/c1-2-3-4-5-6-7-13(21)19-11-10-17(23,9-8-12(18)20)16-15(24-16)14(11)22/h4-7,10,14-16,22-23H,2-3,8-9H2,1H3,(H2,18,20)(H,19,21)	IDYBPXGFXNUWQB-UHFFFAOYSA-N	C17H24N2O5	Linear polyketides	Linear polyenes	Polyketides	3	7.1156		generic_?	NPA=NPA022250,COCONUT=CNP0073211	52.90511:3080 56.04968:14729 56.96501:4954 57.07006:15661 67.60298:5513 67.60624:17229 68.04948:11970 70.75232:3217 79.05412:14810 84.0444:154598 85.04797:9948 91.05402:5082 94.06512:10236 102.05453:3832 102.74216:3140 106.06518:1402586 107.06845:105075 114.05505:35484 114.54239:3344 118.06512:49780 130.04968:22063 130.06494:24190 131.07191:4545 142.04994:12704 144.08092:37665 146.0603:5288 154.0…	[M+H]+	6.563	337.17569	3.7804	3.7461	3.9761	2.6764	1.6688	1.6897	2.8031	2.7178	1.9177	2.1013	2.0001	0.9754	1.5384	7.2457	8.598	9.7352	10.0055	10.3505	6.0453	6.9887	3.2098	6.7519	5.235	3.4907	4.0615	2.7436	5.2469	4.6785
445	1	pos_87	C	L-Pipecolic acid	OC(=O)C1CCCCN1	Unknown	InChI=1S/C6H11NO2/c8-6(9)5-3-1-2-4-7-5/h5,7H,1-4H2,(H,8,9)	HXEACLLIILLPRG-UHFFFAOYSA-N	C6H11NO2	Small peptides	Aminoacids|Dipeptides	Amino acids and Peptides	2		81.6	family_1a	Unknown	56.0497:239355 60.98671:155511 68.59873:121683 71.02783:55609 78.99708:777022 84.04434:67467 84.0808:14569639 85.07853:104939 85.0841:1135203 86.018:49934 88.98114:83138 97.00764:433113 99.00338:54499 102.01296:110690 105.93453:48601 106.99158:66510 120.02377:120276 122.01907:108630 130.08632:3112419 131.08983:267677	[M+H]+	1.577	130.0862	8.9135	8.6968	8.926	0.7938	0.9521	0.8374	1.3326	1.4831	0.9596	1.0919	1.0305	0.9762	1.0118	10.9307	11.7151	8.7338	7.7423	11.0476	8.2875	8.8279	5.1713	7.8764	13.8321	17.9771	13.1594	19.1546	22.1751	13.0834
437	18	pos_982	C	licoagroside B	Cc1c(OC2OC(COC(=O)CC(C)(O)CC(O)=O)C(O)C(O)C2O)c(=O)cco1	family	InChI=1S/C18H24O12/c1-8-16(9(19)3-4-27-8)30-17-15(25)14(24)13(23)10(29-17)7-28-12(22)6-18(2,26)5-11(20)21/h3-4,10,13-15,17,23-26H,5-7H2,1-2H3,(H,20,21)	WCVUIHQUPRXYKT-UHFFFAOYSA-N	C18H24O12	Unknown	Unknown	Unknown	3	7.1517		family_1a	chebi:142266|hmdb:HMDB0036523|knapsack:C00019031|cas:325144-72-7|chemspider:552791|foodb:FDB015423|pmid:11140606	53.03879:17284 56.07417:4998 57.03381:6993 61.02847:5720 68.14029:14369 69.03358:39825 70.06551:7102 71.04907:11093 73.02856:10468 73.22038:4631 81.03348:49184 81.06989:11538 84.08082:10787 84.49753:5159 85.0284:123712 86.03151:5483 97.02834:73565 98.03202:5681 99.04411:71316 102.09124:16801 103.03897:98909 109.02838:62067 123.11681:12303 127.03895:2133132 128.04227:165303 129.04346:16603 145.049…	[M+H]+	4.457	433.13431	5.7538	5.8063	6.3589	5.6827	3.8331	4.991	5.0673	6.5037	3.2299	6.2829	3.801	3.9866	4.3245	8.3279	7.8948	8.9489	11.7273	9.5989	6.2611	5.1372	4.7597	6.2392	5.0896	6.7528	9.8032	9.6235	9.6365	5.8242
11	1	neg_146	Po	Deoxyinosine	OCC1OC(CC1O)n2cnc3c(O)ncnc23	Unknown	InChI=1S/C10H12N4O4/c15-2-6-5(16)1-7(18-6)14-4-13-8-9(14)11-3-12-10(8)17/h3-7,15-16H,1-2H2,(H,11,12,17)	VGONTNSXDCQUGY-UHFFFAOYSA-N	C10H12N4O4	Nucleosides	Purine nucleos(t)ides	Carbohydrates	2		80.1	generic_?	Unknown	58.42401:1092 61.98791:2345 65.01403:1212 67.40091:5795 71.0135:1951 78.95894:6016 78.99799:4527 81.62695:1187 87.05643:3084 92.02557:28620 93.02881:1468 96.96003:1970 101.02426:1420 108.02016:20344 114.95123:3384 118.04086:9375 119.0111:11376 121.02951:1057 122.98752:4503 126.0306:4155 134.02319:3553 135.03085:529853 136.03496:25031 140.94482:1443 146.96095:4251 150.92775:1487 152.91702:1952 161…	[M-H]-	2.792	251.07852	0.8111	0.8156	0.8367	0.0	0.0	0.0531	0.0	0.0	0.0	0.0243	0.0373	0.0294	0.098	0.0	0.0	0.0073	0.0	0.0	1.139	1.1466	2.9401	2.6813	1.492	0.0	0.0	0.0	0.0054	0.0
381	2	neg_173	Po	formononetin	COc1ccc(cc1)-c2coc3cc(O)ccc3c2=O	genus	InChI=1S/C16H12O4/c1-19-12-5-2-10(3-6-12)14-9-20-15-8-11(17)4-7-13(15)16(14)18/h2-9,17H,1H3	HKQYGTCOTHHOMP-UHFFFAOYSA-N	C16H12O4	Isoflavonoids	Isoflavones	Shikimates and Phenylpropanoids	3	6.9117		genus_1a	dnp:CMR04|chebi:18088|hmdb:HMDB0005808|knapsack:C00002525|lipid maps:LMPK12050037|plantcyc:FORMONONETIN|unpd:UNPD95557|beilstein registry number:1288158|bmdb:BMDB05808|cas:485-72-3|chemspider:4444070|foodb:FDB012219|kegg compounds:C00858|kegg ligand:C00858|lincs:LSM-19000|metabolights:MTBLC18088|metacyc:FORMONONETIN|nci:93360|phenol explorer compound:395|pmid:15506819|pubchem cid:5280378|reaxys r…	65.87299:2299 89.65256:2243 91.01894:13434 97.47508:2090 98.95582:6136 108.02168:4170 110.43719:2232 132.01135:5659 132.02122:106220 133.0249:10736 135.00839:47145 136.01155:4097 136.94957:2707 137.92113:2154 148.96146:4108 153.01913:3528 154.97163:6390 156.97035:2855 161.2366:2803 166.97203:5236 167.05023:8353 180.05721:3905 182.57312:2428 192.11568:2415 195.04468:86202 196.04897:12959 197.05411…	[M-H]-	8.958	267.06644	3.0946	3.2228	3.1868	0.4942	0.3704	0.3431	0.4839	1.3411	0.4492	0.7273	0.4536	1.2291	2.3328	2.413	1.8549	1.464	2.2573	1.5531	6.7535	8.3668	4.3507	6.8577	6.0879	1.2634	1.086	5.5673	1.9087	2.4141
461	10	neg_226	Po	salicylic acid 2-beta-D-glucoside	OCC1OC(Oc2c(cccc2)C([O-])=O)C(O)C(O)C1O	genus	InChI=1S/C13H16O8/c14-5-8-9(15)10(16)11(17)13(21-8)20-7-4-2-1-3-6(7)12(18)19/h1-4,8-11,13-17H,5H2,(H,18,19)/p-1	TZPBMNKOLMSJPF-UHFFFAOYSA-M	C13H15O8	Phenolic acids (C6-C1)	Simple phenolic acids	Shikimates and Phenylpropanoids	3	5.4514		genus_1a	plantcyc:CPD-12628|chemspider:5448097|pubchem cid:7099939	55.06898:1373 55.63959:1597 61.9878:3773 66.88734:1389 68.00952:1414 68.01283:6811 78.95911:4731 82.44025:1326 85.02934:1866 93.03462:112978 94.03799:7825 96.96019:1861 106.15617:1425 107.61591:1560 115.45672:1261 137.02402:177890 138.0273:12860 143.10359:1373 161.28944:1929 184.01442:2020 184.93307:1575 185.00612:11929 216.92688:1873 223.50684:1601 226.93794:1955 228.92657:1717 232.95036:1621 24…	[M-H]-	3.137	299.07742	3.1802	3.163	3.1934	1.3397	1.2429	1.0766	1.3158	0.9529	1.1498	1.5198	1.1937	1.2792	1.5095	1.2693	0.8438	0.8051	1.0364	0.8676	3.3522	2.0353	3.4131	4.4148	2.2912	2.3524	1.3368	1.6284	2.7742	1.9148
28	2	neg_227	Po	2-{[(2S,3R,4S,5S,6R)-3,4,5-trihydroxy-6-(hydroxymethyl)oxan-2-yl]oxy}benzoate	OCC1OC(Oc2c(cccc2)C([O-])=O)C(O)C(O)C1O	genus	InChI=1S/C13H16O8/c14-5-8-9(15)10(16)11(17)13(21-8)20-7-4-2-1-3-6(7)12(18)19/h1-4,8-11,13-17H,5H2,(H,18,19)/p-1	TZPBMNKOLMSJPF-UHFFFAOYSA-M	C13H15O8	Phenolic acids (C6-C1)	Simple phenolic acids	Shikimates and Phenylpropanoids	3	6.1031		genus_1a	plantcyc:CPD-12628|chemspider:5448097|pubchem cid:7099939	59.01334:1747 61.98787:5470 66.94678:1467 67.7989:4330 67.80268:3578 71.01349:11501 73.02939:1689 85.02948:3985 88.04031:2669 93.03458:152379 94.03809:9901 101.02431:3624 127.96648:1990 137.02394:346185 138.02722:28584 164.90887:2100 185.00671:12525 186.01062:2211 197.71605:1809 226.93861:2574 236.91278:1966 240.01971:2813 242.9346:3924 244.91373:3297 270.93008:2519 272.85001:2315 272.91641:2578 …	[M-H]-	4.067	299.07745	0.7725	0.7139	0.8082	0.0	0.0	0.0598	0.0	0.0	0.0	0.0243	0.0259	0.0	0.0279	1.3442	0.4963	0.319	0.3004	0.3101	1.6662	1.866	1.022	2.2652	1.4792	0.8758	0.5081	0.3355	0.607	0.6948
35	1	neg_245	Po	5-hydroxy-13,14-dimethoxy-8,17-dioxatetracyclo[8.7.0.0??,??.0????,????]heptadeca-1(10),2(7),3,5,11,13,15-heptaen-9-one	COc1c(OC)cc2c(oc3c2c(=O)oc4c3ccc(O)c4)c1	genus	InChI=1S/C17H12O6/c1-20-13-6-10-12(7-14(13)21-2)22-16-9-4-3-8(18)5-11(9)23-17(19)15(10)16/h3-7,18H,1-2H3	PKLPURDVDNBFCI-UHFFFAOYSA-N	C17H12O6	Isoflavonoids	Coumestan	Shikimates and Phenylpropanoids	3	5.9786		genus_1a	dnp:CLV10|hmdb:HMDB0030561|knapsack:C00009768|lipid maps:LMPK12090028|unpd:UNPD26507|cas:5252-40-4|chemspider:4678016|foodb:FDB002445|pubchem cid:5748556	58.57294:4552 61.98771:4929 62.08035:5196 63.44967:4616 75.10051:4467 79.95738:22396 88.34425:4474 97.52:4753 98.51357:4561 119.04974:14672 130.19469:5249 156.95872:4761 161.27429:6455 164.90967:5446 170.00418:21109 181.91695:6870 183.0118:798129 184.01578:73440 185.00746:22444 197.02733:41899 198.03398:7477 201.99466:8642 212.04738:5547 216.00932:63419 217.01198:9711 219.70505:4561 225.05809:664…	[M-H]-	9.506	311.05634	0.4258	0.5127	0.5192	0.0	0.0	0.0	0.0	0.0	0.0	0.0	0.0	0.0	0.0	0.0116	0.0	0.0	0.0	0.0	0.8019	0.7188	1.5026	1.35	0.78	0.0289	0.0	0.0145	0.0	0.0
36	1	neg_25	Po	Unknown		Unknown	Unknown	Unknown	Unknown	Unknown	Unknown	Unknown	4			?_?	Unknown	68.36559:62136 68.36906:67551 71.01357:519948 72.9929:155790 75.00874:35355 77.72559:33294 79.95725:48650 80.9653:34521 86.48577:33560 89.0244:57055 90.52996:30111 90.99786:41817 96.56139:33095 100.507:36201 108.60287:31156 108.86337:35542 109.37749:31517 115.00327:788241 121.06203:39217 132.86765:113756 133.01387:142713 134.86493:177268 134.89461:82572	[M-H]-	1.314	133.01379	20.6997	20.0668	20.2912	17.5789	16.6062	18.6557	14.4541	13.4235	16.2395	17.3774	20.0806	13.0726	17.5441	11.9197	12.6383	6.2851	10.4795	7.2051	13.4292	15.5178	13.8487	9.4553	12.966	25.9342	11.2581	28.1161	19.9624	20.9945
38	1	neg_254	Po	4-(beta-D-glucosyloxy)-3-hydroxy-benzoic acid;Protocatechuic acid 4-O-beta-glucoside	OCC1OC(Oc2ccc(cc2O)C(O)=O)C(O)C(O)C1O	generic	InChI=1S/C13H16O9/c14-4-8-9(16)10(17)11(18)13(22-8)21-7-2-1-5(12(19)20)3-6(7)15/h1-3,8-11,13-18H,4H2,(H,19,20)	HFFREILXLCWCQH-UHFFFAOYSA-N	C13H16O9	Phenolic acids (C6-C1)	Simple phenolic acids	Shikimates and Phenylpropanoids	3	6.9638		generic_?	KNApSAcK=C00035947,FooDB=FDB021851,UNPD=UNPD37887,COCONUT=CNP0324932	57.03408:8570 65.0393:14463 67.01839:7432 68.07249:17941 69.03082:6732 71.01348:27733 85.02951:41442 91.01924:12079 95.01384:23910 99.00873:7131 101.02456:9870 108.02141:870049 109.02946:309408 110.03265:16781 123.00828:20645 135.00827:73056 140.94395:26139 147.38069:6934 151.03955:15639 152.01108:549922 153.01906:281995 154.02232:24876 155.45949:7175 161.18362:8157 163.03911:10734 165.01886:1347…	[M-H]-	3.214	315.07248	4.682	5.1457	5.1266	0.4125	0.4084	0.6542	0.3998	0.6216	0.4796	0.9028	0.6575	0.6267	0.8209	8.3543	5.4172	4.3185	4.2595	4.2018	8.967	7.1614	6.5083	9.9538	9.1677	4.1808	3.128	3.5381	3.4189	5.8472
50	1	neg_31	Po	Unknown		Unknown	Unknown	Unknown	Unknown	Unknown	Unknown	Unknown	4			?_?	Unknown	54.87955:912 55.74125:1061 58.0295:1443 61.98768:1406 67.36206:5966 70.18885:934 71.01359:1257 74.18476:1065 79.95728:17853 87.92516:1984 89.94813:990 96.94102:1327 96.96013:1796 98.0611:1066 98.95654:4381 100.04057:11869 103.92029:3192 104.9277:1238 114.95123:5258 129.93822:2354 131.8447:1061 141.86775:62760 142.05115:1517 142.86781:1725 142.89775:4219 142.93956:12042 142.94919:1674 142.98047:72…	[M-H]-	1.866	142.05057	1.9304	1.7677	1.9125	2.3902	2.1873	2.1213	2.5654	2.1624	2.0898	2.3519	2.3395	1.9609	2.3956	2.0133	1.6575	1.6744	1.9336	1.6575	3.1404	2.2754	2.9193	3.5359	2.3192	0.797	0.6177	0.6868	0.7563	0.691
345	16	neg_420	Po	pterosupin	OCC1OC(C(O)C(O)C1O)c2c(O)c(ccc2O)C(=O)CC(O)c3ccc(O)cc3	genus	InChI=1S/C21H24O10/c22-8-15-18(28)19(29)20(30)21(31-15)16-12(24)6-5-11(17(16)27)14(26)7-13(25)9-1-3-10(23)4-2-9/h1-6,13,15,18-25,27-30H,7-8H2	PXLWOFBAEVGBOA-UHFFFAOYSA-N	C21H24O10	Flavonoids	Chalcones	Shikimates and Phenylpropanoids	3	6.994		genus_1a	dnp:KRF86|lipid maps:LMPK12120581|pubchem cid:23498438	55.01837:1597 59.01349:1247 61.98778:2332 65.03937:3170 67.01878:4334 68.72662:4096 71.01369:7208 73.02942:3754 78.95863:1490 79.05534:1724 80.96518:2890 81.03461:2265 85.03001:2782 85.52238:1445 91.05551:3457 93.03467:47982 93.52532:1524 94.03812:3145 95.01378:7468 97.40152:1617 99.0086:3716 99.0453:2488 100.94654:1645 104.1834:1328 105.03444:2351 107.05005:13432 108.02155:6132 109.02914:23555 1…	[M-H]-	4.745	435.12958	12.9091	12.4729	12.4438	1.2206	0.6482	0.6551	1.1479	1.2649	0.8936	0.7446	1.3998	1.1329	1.2214	3.6573	3.1917	3.2665	2.6578	3.132	15.4552	14.099	16.5937	21.2057	15.1694	5.5046	6.407	5.4132	6.1821	5.9465
177	6	neg_444	Po	(2R)-2-[(S)-hydroperoxy(4-{[(2S,3R,4S,5S,6R)-3,4,5-trihydroxy-6-(hydroxymethyl)oxan-2-yl]oxy}phenyl)methyl]-6-hydroxy-2H-1-benzofuran-3-one	OCC1OC(Oc2ccc(cc2)C(OO)C3Oc4cc(O)ccc4C3=O)C(O)C(O)C1O	genus	InChI=1S/C21H22O11/c22-8-14-16(25)17(26)18(27)21(31-14)29-11-4-1-9(2-5-11)19(32-28)20-15(24)12-6-3-10(23)7-13(12)30-20/h1-7,14,16-23,25-28H,8H2	NPIHSZVTLIVPAU-UHFFFAOYSA-N	C21H22O11	Flavonoids	Flavanones	Shikimates and Phenylpropanoids	3	7.0113		genus_1a	plantcyc:CPD-17478|pubchem cid:91820401	50.80009:4747 51.34113:3495 57.03399:113169 58.03732:5098 59.01333:6035 61.98774:8374 63.02356:6320 65.0029:42841 66.66745:42948 70.43323:3850 71.01361:5894 81.03436:23464 83.01381:78531 85.02924:5653 93.03463:17761 95.01399:4150 97.02943:10103 98.0202:4149 107.01362:49126 107.05003:13165 108.02172:5858 109.02911:16140 111.00819:5886 117.03429:24515 121.02898:10184 123.00838:5320 123.04505:14977 …	[M-H]-	4.863	449.10907	32.1365	32.0484	33.1432	27.7154	13.8288	11.4487	17.8631	17.7619	19.8077	9.792	23.1458	17.0972	10.1232	26.3362	18.5007	19.2897	22.2334	17.1897	29.4577	23.5655	33.584	45.9666	28.4	35.789	20.6531	33.3059	23.7187	27.8364
94	1	neg_475	Po	UNPD205547	OCC1OC(Oc2c(cc3ccc(=O)oc3c2)-c4c(O)ccc5c4oc(=O)cc5)C(O)C(O)C1O	generic	InChI=1S/C24H20O11/c25-9-16-20(29)21(30)22(31)24(34-16)33-15-8-14-11(3-6-17(27)32-14)7-12(15)19-13(26)4-1-10-2-5-18(28)35-23(10)19/h1-8,16,20-22,24-26,29-31H,9H2	NNPSODHWEGYGOP-UHFFFAOYSA-N	C24H20O11	Coumarins	Simple coumarins	Shikimates and Phenylpropanoids	3	6.9351		generic_?	UNPD=UNPD205547,COCONUT=CNP0123015	50.74695:1093 54.80834:1231 54.99531:1105 59.01325:1867 61.98807:2036 63.19973:1319 68.49488:2872 71.01361:3372 73.42095:1185 85.02935:1235 85.80151:1095 93.61411:1082 95.01321:1173 95.20862:1100 97.8568:1037 108.89235:1001 117.03406:3762 123.03407:1121 123.04436:1723 132.02112:1963 133.02895:4848 137.02335:1380 144.02258:1193 145.02869:1236 157.02892:1652 159.0087:1539 161.02382:1911 161.24701:1…	[M-H]-	6.135	483.09348	0.938	0.983	0.9774	0.0882	0.0498	0.0643	0.0857	0.1365	0.0506	0.0638	0.0917	0.0175	0.0719	0.4613	0.7038	0.3568	0.4773	0.4982	0.5465	0.4832	1.1243	1.3451	0.8999	0.2613	0.3904	0.234	0.4102	0.2436
228	2	neg_486	Po	8-C-?-D-Glucopyranosyl-4',7-dihydroxyisoflavone; 6''-O-Malonyl	OC1C(O)C(COC(=O)CC(O)=O)OC(C1O)c2c3occ(c(=O)c3ccc2O)-c4ccc(O)cc4	family	InChI=1S/C24H22O12/c25-11-3-1-10(2-4-11)13-8-35-23-12(19(13)30)5-6-14(26)18(23)24-22(33)21(32)20(31)15(36-24)9-34-17(29)7-16(27)28/h1-6,8,15,20-22,24-26,31-33H,7,9H2,(H,27,28)	PYAAYMRVSVAOSO-UHFFFAOYSA-N	C24H22O12	Isoflavonoids	Isoflavones	Shikimates and Phenylpropanoids	3	7.0606		family_1a	dnp:NMJ64	58.00543:1992 59.01328:3968 60.34227:1601 61.98799:2304 68.73036:1982 68.73359:3350 71.01344:6074 85.02918:1885 87.00832:1733 89.02441:2079 93.03455:5490 101.0241:1848 113.02416:1582 116.91743:1417 117.03416:2278 119.04974:5020 121.02914:5134 123.04493:4952 125.63144:1364 130.04214:2802 131.04987:4797 132.02095:3089 133.02925:22558 134.03307:2309 137.02403:1638 137.0601:4188 143.04916:1788 145.02…	[M-H]-	4.934	501.10443	2.6512	2.6703	2.5015	0.8254	0.4842	0.5864	0.5414	0.8355	0.5773	0.49	1.2189	0.3927	0.6162	1.8228	1.7517	1.9543	1.8478	1.466	2.445	3.1159	3.7096	4.141	3.2469	1.3995	1.4147	1.2048	1.3284	1.0882
102	2	neg_506	Po	6-Methoxykaempferol 3-(6''-acetylglucoside)	COc1c(O)cc2oc(-c3ccc(O)cc3)c(OC4OC(COC(C)=O)C(O)C(O)C4O)c(=O)c2c1O	generic	InChI=1S/C24H24O13/c1-9(25)34-8-14-16(28)19(31)20(32)24(36-14)37-23-18(30)15-13(7-12(27)22(33-2)17(15)29)35-21(23)10-3-5-11(26)6-4-10/h3-7,14,16,19-20,24,26-29,31-32H,8H2,1-2H3	ZUFMRXXRSIQSPO-UHFFFAOYSA-N	C24H24O13	Flavonoids	Flavonols	Shikimates and Phenylpropanoids	3	6.3202		generic_?	KNApSAcK=C00005935,LipidMAPS=LMPK12112826,UNPD=UNPD124622;UNPD136424,COCONUT=CNP0162262	93.73705:6026 97.37996:8193 109.02917:8767 117.03409:6738 124.04417:5376 128.35936:5825 135.00842:9469 137.02426:8732 161.23814:5823 163.00325:7029 163.03954:6368 190.02704:6847 191.03526:19776 207.13078:6377 243.06625:15087 253.05049:109111 254.05321:20252 271.05954:7111 293.25031:6581 297.07739:16985 315.08737:30301 345.09714:6717 354.87418:7805 357.09824:7709 432.19644:7818 435.12717:31051 464…	[M-H]-	5.363	519.11456	3.0023	2.9579	2.9068	1.3225	0.9856	0.9242	1.0766	0.9751	1.0319	0.8493	1.1264	0.7996	0.9689	2.1866	2.407	2.5097	2.8499	2.4487	3.7823	3.8062	3.6152	4.3242	3.6792	2.2187	2.9895	2.4039	3.0652	2.5725
109	2	neg_527	Po	Clitoriacetal; 11-O-?-D-Glucopyranoside	COc1cc2c(c(OC3OC(CO)C(O)C(O)C3O)c1)C(=O)C4(O)C(O2)C(O)Oc5cc(OC)c(OC)cc45	family	InChI=1S/C25H28O14/c1-33-9-4-14-17(15(5-9)38-24-20(29)19(28)18(27)16(8-26)39-24)21(30)25(32)10-6-12(34-2)13(35-3)7-11(10)37-23(31)22(25)36-14/h4-7,16,18-20,22-24,26-29,31-32H,8H2,1-3H3	ZPWZKJPCEQUSQD-UHFFFAOYSA-N	C25H28O14	Isoflavonoids	Rotenoids	Shikimates and Phenylpropanoids	3	6.7518		family_1a	dnp:DQY61	51.77999:1471 52.85652:1447 61.98795:3368 65.03928:2517 67.51994:5734 67.52387:2940 71.01381:2110 72.99287:6667 78.36082:1557 85.02967:4096 93.03463:536697 94.03799:39769 101.02416:2060 113.02404:1915 137.02403:830996 138.02748:74695 139.02905:5771 161.2319:2178 161.28036:1864 167.03384:2042 187.71201:1633 280.40451:1950 354.85904:2006 354.89908:2853 383.85385:1690 413.10919:80453 414.11081:18578…	[M-H]-	4.989	551.14117	1.536	1.4942	1.4874	0.6229	0.4737	0.4549	0.6285	0.5398	0.4613	0.6611	0.6799	0.5909	0.7266	0.7973	0.6141	0.8087	1.0151	0.7825	0.9674	0.8819	0.9301	1.4173	1.0864	1.2098	1.3697	0.9608	1.3704	1.1635
118	1	neg_569	Po	5-hydroxy-2-(4-hydroxyphenyl)-3,7-bis({[3,4,5-trihydroxy-6-(hydroxymethyl)oxan-2-yl]oxy})-2,3-dihydro-1-benzopyran-4-one	OCC1OC(OC2C(Oc3cc(OC4OC(CO)C(O)C(O)C4O)cc(O)c3C2=O)c5ccc(O)cc5)C(O)C(O)C1O	family	InChI=1S/C27H32O16/c28-7-14-17(32)20(35)22(37)26(41-14)39-11-5-12(31)16-13(6-11)40-24(9-1-3-10(30)4-2-9)25(19(16)34)43-27-23(38)21(36)18(33)15(8-29)42-27/h1-6,14-15,17-18,20-33,35-38H,7-8H2	LYZCSBKUDSHVOD-UHFFFAOYSA-N	C27H32O16	Flavonoids	Dihydroflavonols	Shikimates and Phenylpropanoids	3	7.1184		family_1a	dnp:MPH79|hmdb:HMDB0040559|cas:80212-10-8|foodb:FDB020335	57.03414:2724 61.98775:1054 66.17212:1136 68.5265:1473 68.52958:1912 68.99805:1301 69.03418:1129 71.01357:4535 73.02932:2163 77.74344:1240 81.03457:12549 83.0137:16056 84.71679:1061 85.0295:3130 93.03458:3372 95.01404:4974 95.05008:7671 97.02931:9170 99.04494:7624 107.05022:2304 108.02165:1811 109.02919:6667 111.00793:1416 111.04455:3862 113.02433:2341 117.03437:5180 121.02915:4148 121.06598:1108…	[M-H]-	4.23	611.16211	1.2557	1.2334	1.2602	0.138	0.0788	0.1702	0.2763	0.4125	0.1137	0.2161	0.3315	0.2473	0.3078	0.4852	0.3794	0.2598	0.4352	0.2332	1.8298	1.3682	1.5772	1.883	1.5417	0.5782	0.4016	0.669	0.5612	0.7062
149	12	neg_630	Po	UNPD219026	CC1CC(O)C(OC(C)=O)C(OC2CC3(C)C4CC=C5C(CC(O)C(O)C5(C)C)C4(C)C(=O)CC3(C)C2C(C)(O)C(=O)C=CC(C)(C)O)O1	generic	InChI=1S/C38H58O11/c1-19-15-23(40)29(48-20(2)39)32(47-19)49-25-17-35(7)26-12-11-21-22(16-24(41)31(44)34(21,5)6)37(26,9)28(43)18-36(35,8)30(25)38(10,46)27(42)13-14-33(3,4)45/h11,13-14,19,22-26,29-32,40-41,44-46H,12,15-18H2,1-10H3	DTURAJZFENJITC-UHFFFAOYSA-N	C38H58O11	Triterpenoids	Cucurbitane triterpenoids	Terpenoids	3	6.3284		generic_?	UNPD=UNPD219026,COCONUT=CNP0206653	57.03399:1745 59.01331:64639 61.43301:1519 61.98763:1810 67.01608:8493 67.02:2575 71.0136:10157 85.02925:7823 89.39536:1683 90.92072:1402 99.00831:2505 101.02428:6007 113.02396:7718 168.42477:1502 187.69431:1849 218.78152:1714 354.85956:3274 390.3053:1847 420.16208:1665 421.30969:1617 456.59277:1893 463.49509:2519 485.32877:3211 512.97406:1582 627.52002:6215 629.36926:25208 630.37445:12456 631.37…	[M-H]-	10.356	689.38959	9.5564	9.6066	9.5049	17.9067	19.0295	17.1709	18.8367	14.2242	15.5573	12.2684	11.9932	14.441	12.3263	13.5964	14.5256	15.3414	12.5636	14.6461	10.6022	13.1795	11.8578	9.7939	10.5873	8.2796	9.5968	6.2111	7.8169	8.1473
164	3	neg_632	Po	17-(1,2-dihydroxyethyl)-19-hydroxy-8-(hydroxymethyl)-1,2,8,15,17-pentamethyl-18-[(3,4,5-trihydroxyoxan-2-yl)oxy]hexacyclo[12.10.0.0?,??.0?,??.0??,??.0??,??]tetracosa-11,21-diene-5-carboxylic acid	CC1(CO)CCC2(CCC3(C)C(=CCC4C3(C)CC5C=CC6C(O)C(OC7OCC(O)C(O)C7O)C(C)(C(O)CO)C5C46C)C2C1)C(O)=O	generic	InChI=1S/C38H58O11/c1-33(18-40)10-12-38(32(46)47)13-11-34(2)20(22(38)15-33)8-9-24-35(34,3)14-19-6-7-21-26(43)30(49-31-28(45)27(44)23(41)17-48-31)37(5,25(42)16-39)29(19)36(21,24)4/h6-8,19,21-31,39-45H,9-18H2,1-5H3,(H,46,47)	KQBPFHIILQYJRX-UHFFFAOYSA-N	C38H58O11	Triterpenoids	Oleae triterpenoids	Terpenoids	3	5.8166		generic_?	COCONUT=CNP0406817	50.23062:10249 52.5189:10809 57.03403:37109 59.01337:237734 67.08463:77817 71.01354:49017 75.0086:70199 83.01385:29469 85.02959:157388 95.01382:24046 99.00877:36132 111.00834:35873 112.01633:18394 113.0242:178596 114.02796:11343 129.01851:12008 161.29131:13559 186.8459:11812 244.3425:11242 254.29695:10711 274.58633:11061 280.36298:11874 354.81891:14973 390.35135:13760 422.18909:12542 453.34229:14…	[M-H]-	11.119	689.39093	12.6238	13.6508	13.9836	18.3448	18.7114	18.2218	17.6707	17.6167	18.3098	16.5726	19.305	13.1533	17.3664	18.0766	14.8423	19.0115	15.2737	16.8212	14.518	17.1559	11.6017	15.7389	12.3203	16.6076	9.7146	15.7008	15.2654	12.5412
150	7	neg_635	Po	20-hydroxy-7,18,23-tris(hydroxymethyl)-7,14,18,22-tetramethyl-19-[(3,4,5-trihydroxyoxan-2-yl)oxy]hexacyclo[11.9.3.0?,??.0?,??.0?,??.0??,??]pentacos-3-ene-10-carboxylic acid	CC1(CO)CCC2(CCC34CCC(CO)C5(CC=C3C2C1)C6(C)CC(O)C(OC7OCC(O)C(O)C7O)C(C)(CO)C6CCC45C)C(O)=O	generic	InChI=1S/C38H60O11/c1-32(19-40)11-12-36(31(46)47)13-14-37-9-5-21(17-39)38(10-6-22(37)23(36)15-32)34(3)16-24(42)29(49-30-28(45)27(44)25(43)18-48-30)33(2,20-41)26(34)7-8-35(37,38)4/h6,21,23-30,39-45H,5,7-20H2,1-4H3,(H,46,47)	DGMBHQYFTCLWNH-UHFFFAOYSA-N	C38H60O11	Triterpenoids	Oleae triterpenoids	Terpenoids	3	7.0781		generic_?	COCONUT=CNP0278119	52.62229:7041 57.03395:10533 57.55966:6868 59.01332:376141 60.01675:6570 71.01358:86542 72.99247:7228 73.02927:19046 83.01385:15309 85.02963:41361 89.02454:7370 95.0136:11607 99.00875:10997 101.02434:38301 105.8273:7629 113.02421:29129 134.36377:8771 158.34833:6895 187.67421:7915 200.25444:6600 233.17873:13791 280.33493:7997 291.35617:7706 354.80673:16752 439.32397:13879 487.34399:55200 488.34756…	[M-H]-	9.819	691.40497	5.6392	5.7981	5.4765	10.7334	11.1741	10.8382	12.2798	10.6347	9.286	8.2242	6.9615	10.1204	7.2621	8.3525	9.0026	8.7593	7.942	8.9958	7.3095	8.3688	7.8969	6.7105	7.3825	4.6202	6.2382	3.544	4.4529	4.7911
142	1	neg_639	Po	UNPD142457	CC(C)=CC1CC(C)(O)C2C(CC3(C)C4CC=C5C(CC(OC6OC(CO)C(O)C(O)C6O)C(O)C5(C)C)C4(C)C(=O)CC23C)O1	generic	InChI=1S/C36H56O10/c1-17(2)11-18-13-35(7,43)29-22(44-18)14-33(5)24-10-9-19-20(36(24,8)25(38)15-34(29,33)6)12-21(30(42)32(19,3)4)45-31-28(41)27(40)26(39)23(16-37)46-31/h9,11,18,20-24,26-31,37,39-43H,10,12-16H2,1-8H3	YYJXCGCIKYRSHB-UHFFFAOYSA-N	C36H56O10	Triterpenoids	Cucurbitane triterpenoids	Terpenoids	3	6.0096		generic_?	UNPD=UNPD142457,COCONUT=CNP0225769	58.52629:2663 59.01322:3802 61.98786:2655 68.70056:4630 68.7041:4115 71.01354:8485 85.02943:3888 90.11868:2459 101.02438:2522 105.14491:2299 109.42207:2543 110.12444:2411 113.02429:4638 189.48477:2427 218.38234:2744 226.91493:2818 354.89539:4434 356.74893:2941 390.33585:3313 456.08069:2862 485.32779:6385 575.67944:3365 634.50006:3255 644.7301:2976 647.38037:320201 648.38379:175647 649.38989:36979	[M+FA-H]-	9.934	693.38599	3.9895	4.1944	4.2473	4.4518	4.7974	5.1221	7.2131	20.5606	3.8885	3.0578	3.6182	3.2508	5.8113	6.2386	4.4845	5.5376	5.2312	4.4281	4.5467	8.7004	4.0361	4.3678	4.222	3.3057	5.4557	5.2237	5.418	4.6048
143	1	neg_649	Po	Hyalodendroside A	CC1COC(O)C23CCC4(C)C(CCC5C4(C)CCC6C(C)(C)C(OC7OC(CO)C(O)C(O)C7O)C(CC65CO)OC(C)=O)=C3C(=O)CC12	generic	InChI=1S/C38H58O12/c1-18-16-47-33(46)38-12-11-35(5)20(27(38)22(42)13-21(18)38)7-8-26-36(35,6)10-9-25-34(3,4)31(23(48-19(2)41)14-37(25,26)17-40)50-32-30(45)29(44)28(43)24(15-39)49-32/h18,21,23-26,28-33,39-40,43-46H,7-17H2,1-6H3	VQSOJBKVEUZDMN-UHFFFAOYSA-N	C38H58O12	Triterpenoids	Neohopane triterpenoids	Terpenoids	3	6.3236		generic_?	KNApSAcK=C00046769,UNPD=UNPD121174,NPA=NPA008574,COCONUT=CNP0180051	50.36693:32276 53.6659:26423 55.0182:61626 57.03396:168859 58.00536:141152 59.01331:1905988 69.03426:102492 71.01357:1814442 72.99271:141025 73.0293:207053 75.00846:46489 76.28258:33715 79.14539:32463 83.0138:163086 85.02951:1428238 86.03273:59128 87.00872:82860 89.02452:371870 95.01388:565551 96.01723:51713 101.01759:51827 101.02425:897976 113.02406:2393959 114.02718:119524 119.0347:240177 125.0…	[M-H]-	9.742	705.38623	34.2744	34.9946	35.3036	62.2353	57.263	61.5353	71.9977	61.7694	53.3814	47.3988	45.3451	52.7038	48.3897	45.7113	48.3897	54.6877	48.7276	55.8827	45.3579	48.5573	42.3278	37.3695	42.3122	29.8501	36.6355	21.5531	25.9208	30.5586
157	6	neg_659	Po	Hederagenin base + O-AcetylHex	CC(=O)OCC1OC(OC2CCC3(C)C(CCC4(C)C3CC=C5C6CC(C)(C)CCC6(CCC54C)C(O)=O)C2(C)CO)C(O)C(O)C1O	Unknown	InChI=1S/C38H60O10/c1-21(40)46-19-24-28(41)29(42)30(43)31(47-24)48-27-11-12-34(4)25(35(27,5)20-39)10-13-37(7)26(34)9-8-22-23-18-33(2,3)14-16-38(23,32(44)45)17-15-36(22,37)6/h8,23-31,39,41-43H,9-20H2,1-7H3,(H,44,45)	VBPRYVPCTXJOKZ-UHFFFAOYSA-N	C38H60O10	Triterpenoids	Oleae triterpenoids	Terpenoids	2		85.2	?_?	Unknown	59.01323:47691 63.24024:17791 67.10902:120639 92.24046:25074 97.37389:19914 132.69711:19269 192.74228:24974 196.75452:19943 280.31314:26954 324.12094:22092 354.77347:50566 390.30338:21663 463.38959:29596 644.77728:31063 675.29456:36091 675.41156:733702 676.41522:377144 677.41779:79050 678.43066:24745	[M+FA-H]-	11.22	721.41785	16.002	16.5983	15.3558	26.983	31.8265	30.2907	27.0	21.7291	24.3876	22.6842	21.9792	21.862	20.8792	23.4478	22.008	22.7958	19.0072	21.0668	17.8686	20.1833	17.0601	18.7487	18.5229	16.6585	14.3434	12.1546	14.9057	13.2082
262	18	neg_668	Po	Spirosta-5,25(27)-diene-2,3-diol; 3-O-[?-L-Rhamnopyranosyl-(1?2)-?-D-glucopyranoside]	CC1C2C(CC3C4CC=C5CC(OC6OC(CO)C(O)C(O)C6OC7OC(C)C(O)C(O)C7O)C(O)CC5(C)C4CCC23C)OC81CCC(=C)CO8	family	InChI=1S/C39H60O13/c1-17-8-11-39(47-16-17)18(2)28-26(52-39)13-23-21-7-6-20-12-25(24(41)14-38(20,5)22(21)9-10-37(23,28)4)49-36-34(32(45)30(43)27(15-40)50-36)51-35-33(46)31(44)29(42)19(3)48-35/h6,18-19,21-36,40-46H,1,7-16H2,2-5H3	XBKNVWRLJFXCJR-UHFFFAOYSA-N	C39H60O13	Steroids	Spirostane steroids	Terpenoids	3	6.4013		family_1a	dnp:QYG43	104.5526:9268 113.02365:12946 125.51917:9511 133.60966:9384 227.06706:11441 233.41322:11485 354.77179:17209 439.32172:21376 455.31592:14774 467.31821:18188 469.33566:12017 487.3429:147146 488.34866:21171 525.38019:10586 631.38574:346421 632.388:93379 633.39838:12244 644.77716:10895 649.39746:48950 691.40674:2735336 692.40997:391380	[M-H]-	9.611	735.39685	5.8259	6.2376	5.9512	8.7689	10.1384	8.5667	9.0708	8.915	6.8282	6.7989	4.4325	7.4329	6.0169	7.769	9.0119	9.4931	9.2138	9.5701	8.5904	9.5554	8.0433	7.0809	7.7789	6.4211	8.6095	5.5391	6.5446	7.4907
379	8	neg_75	Po	AZELAIC ACID	OC(=O)CCCCCCCC(O)=O	Unknown	InChI=1S/C9H16O4/c10-8(11)6-4-2-1-3-5-7-9(12)13/h1-7H2,(H,10,11)(H,12,13)	BDJRBEYXGGNYIS-UHFFFAOYSA-N	C9H16O4	Fatty Acids and Conjugates	Dicarboxylic acids	Fatty acids	2		92.2	generic_?	Unknown	54.70342:4968 57.03407:100270 61.98792:31454 67.89104:16735 69.03426:12556 71.05001:8866 78.95913:5241 80.02667:7633 83.05021:25217 95.05032:18817 97.06589:292099 98.0692:23395 123.08125:148938 124.08466:13044 125.09682:2729961 126.10019:259971 127.10309:7267 129.53677:4504 141.86775:70281 143.10744:61091 143.86507:12437 143.98827:5530 144.1104:6103 157.75111:4679 161.28644:5690 169.08681:51769 1…	[M-H]-	6.428	187.0974	2.6071	2.3594	2.0459	2.054	4.2246	1.6882	2.4621	3.3172	54.325	1.5307	0.9446	4.1077	1.5494	1.3041	1.8218	1.3602	1.1296	1.4003	1.3128	1.4399	1.5107	0.9202	1.5527	0.6574	1.4919	0.6208	0.5829	1.0604
178	3	neg_766	Po	Fistuloside B	CC1C2C(CC3C4CC=C5CC(OC6OC(CO)C(O)C(OC7OC(CO)C(O)C(O)C7O)C6OC8OC(C)C(O)C(O)C8O)C(O)CC5(C)C4CCC23C)OC91CCC(C)CO9	generic	InChI=1S/C45H72O18/c1-18-8-11-45(56-17-18)19(2)30-27(63-45)13-24-22-7-6-21-12-26(25(48)14-44(21,5)23(22)9-10-43(24,30)4)58-42-39(62-40-36(54)34(52)31(49)20(3)57-40)38(33(51)29(16-47)60-42)61-41-37(55)35(53)32(50)28(15-46)59-41/h6,18-20,22-42,46-55H,7-17H2,1-5H3	HCWNBMHHBWNUPV-UHFFFAOYSA-N	C45H72O18	Steroids	Spirostane steroids	Terpenoids	3	6.3085		generic_?	HMDB=HMDB0039004,FooDB=FDB018498,COCONUT=CNP0002666	67.12717:135898 71.01353:331582 72.99281:38330 73.02911:34764 83.01384:96165 84.59388:19762 85.02937:200401 87.00883:71907 89.02444:94759 95.01395:60149 97.0293:27724 97.37367:19631 99.00857:31733 101.02425:184967 112.42971:18849 113.02402:187784 119.03474:37226 125.02413:47188 143.03477:33646 158.81133:23465 219.32959:21339 240.42868:18873 254.87064:18936 354.8468:36292 374.65488:20380 437.30621…	[M-H]-	9.283	899.46564	6.8341	6.4436	6.3123	5.7055	8.5441	8.9378	9.9655	8.1066	7.7065	5.3704	6.2858	7.8357	5.3781	10.8655	8.9992	7.1488	7.2655	7.0914	5.6019	7.2225	6.7456	6.4796	6.6447	7.7448	5.8405	6.7712	7.9078	6.2062
216	1	pos_108	Po	Unknown		Unknown	Unknown	Unknown	Unknown	Unknown	Unknown	Unknown	4			?_?	Unknown	52.68685:3517 56.9623:7446 56.96497:125878 63.94234:8487 67.02898:4822 67.96853:14500 68.9771:3847 78.94982:6327 80.34376:3470 80.94502:5478 92.02416:10849 92.04926:11379 92.58603:4159 94.03994:63623 94.06503:18599 96.04395:4243 99.84391:4169 109.05085:12321 110.05978:8312 112.374:4364 114.97092:5287 116.96596:4922 118.92056:145592 119.03522:246025 120.03851:16847 130.98117:7064 136.02184:60297 1…	[M+H]+	1.383	136.06181	1.2309	1.4617	1.3528	4.3	4.1312	4.0451	4.8326	7.1931	3.3672	3.4006	0.7181	3.8731	2.1015	2.6532	2.9829	2.6509	2.8434	2.5308	3.993	5.2929	2.9596	2.1939	4.847	2.0263	2.2959	1.1128	0.7473	3.7693
300	8	pos_165	Po	2-amino-4,6-dihydro-1H-purin-6-one	NC1=NC2N=CN=C2C(=O)N1	generic	InChI=1S/C5H5N5O/c6-5-9-3-2(4(11)10-5)7-1-8-3/h1,3H,(H3,6,9,10,11)	DVSXEQQNZWZVJD-UHFFFAOYSA-N	C5H5N5O	Histidine alkaloids	Imidazole alkaloids	Alkaloids	3	6.8616		generic_?	COCONUT=CNP0085805	55.02943:10350 56.96493:22326 58.06531:5139 67.01808:3939 67.10911:3203 67.92371:12795 70.9417:21985 70.95802:6765 71.92915:17615 71.94026:11856 71.95182:58161 72.93712:10113 80.02444:3515 82.03977:15782 84.08045:5844 88.13779:3550 88.95218:5993 96.08044:3421 99.17482:3904 107.03511:14816 107.95948:4130 109.05087:75235 110.03486:565386 110.97535:10473 111.03158:5642 111.03824:24414 111.96831:2251…	[M+H]+	2.795	152.0567	2.9475	3.0415	3.0286	1.582	1.0238	1.1346	1.5815	3.3377	0.6607	1.2778	0.9514	1.004	1.3833	0.914	1.1794	1.4679	1.8466	1.2671	5.7104	3.6336	2.9146	3.8379	3.5965	1.3085	1.4815	4.5605	2.2368	1.8292
386	9	pos_583	Po	medicarpin	COC1=CC2=C(C=C1)C3COC4=C(C3O2)C=CC(=C4)O	genus	InChI=1S/C16H14O4/c1-20-16-10-14(18)8-4-12(16)5-9-15(19)11-2-6-13(17)7-3-11/h2-10,17-18H,1H3	QJKMIJNRNRLQSS-UHFFFAOYSA-N	C16H14O4	Flavonoids	Chalcones	Shikimates and Phenylpropanoids	2		90	generic_?	pubchem cid:336327	51.45651:1148 53.03876:5769 55.01804:2937 56.9649:3396 58.06522:2328 61.30909:1293 65.0387:3628 66.04628:1550 66.58556:14433 67.05443:5845 68.9971:7289 69.07004:1703 72.99811:2434 77.03856:1874 78.75856:1071 79.05428:22408 81.03335:1427 81.06998:11747 84.95967:20051 88.01621:2291 88.02151:42019 91.05424:13730 93.06973:1651 94.04147:6934 95.04916:9796 103.05402:1749 105.03345:2479 105.06963:1488 1…	[M+H]+	7.791	271.09644	1.1106	1.1591	1.1622	0.0415	0.0354	0.0532	0.1174	0.3311	0.037	0.1323	0.127	0.0921	0.1272	0.2953	0.5656	0.519	0.5507	0.4188	2.8414	1.6533	1.5221	1.4466	2.1288	0.4999	0.8317	0.8503	0.8542	0.5775
466	1	pos_96	Po	Unknown		Unknown	Unknown	Unknown	Unknown	Unknown	Unknown	Unknown	4			?_?	Unknown	54.50339:19110 56.96489:36402 66.75192:56075 66.75581:148167 67.50533:20178 85.65471:19661 86.0964:372290 87.09995:25810 90.9034:58045 92.90051:22193 93.73608:19064 104.00847:23356 122.01931:38119	[M+H]+	1.84	132.10191	3.8106	4.1007	3.842	8.7559	9.2965	8.3549	11.2164	7.643	9.4403	5.6796	8.1296	7.0202	5.7091	4.965	1.7308	2.6593	2.4161	1.9808	1.9853	1.7094	3.5283	3.9727	2.3928	1.4556	0.8903	2.0208	1.6991	1.6668
1	1	neg_105	#N/A	sinapyl aldehyde	COc1cc(C=CC=O)cc(OC)c1O	genus	InChI=1S/C11H12O4/c1-14-9-6-8(4-3-5-12)7-10(15-2)11(9)13/h3-7,13H,1-2H3	CDICDSOGTRCHMG-UHFFFAOYSA-N	C11H12O4	Phenylpropanoids (C6-C3)	Cinnamic acids and derivatives	Shikimates and Phenylpropanoids	3	5.5137		genus_1a	dnp:RGQ13|chebi:27949|knapsack:C00002775|plantcyc:SINAPALDEHYDE|unpd:UNPD116123|beilstein registry number:2215799|cas:20649-43-8|chemspider:4444359|foodb:FDB001515|kegg ligand:C05610|metabolights:MTBLC27949|metacyc:SINAPALDEHYDE|pmid:21080014|pubchem cid:5280802|reaxys registry number:2215799|refmet:Sinapoyl aldehyde|wikipedia:Sinapaldehyde	61.98789:127374 67.83936:8359 72.63562:2084 75.00299:156998 78.95901:4464 78.99789:7157 79.95715:15855 85.02963:2427 94.99299:12797 105.03445:17986 106.99284:6273 118.99259:514405 119.9959:15128 129.08855:2357 133.02907:225492 134.03253:20769 136.9319:4787 141.08948:2468 143.04967:32005 144.05281:2671 145.02972:2424 149.02408:11956 159.8598:2523 161.24324:2743 162.83786:2195 162.9825:743152 163.9…	[M-H]-	6.412	207.06609	0.7092	0.7054	0.6434	1.6244	1.2618	1.3416	1.3196	1.039	1.6187	1.1309	1.2376	1.1526	1.6978	0.5002	0.453	0.5634	0.6722	0.5475	0.4516	0.6346	0.4391	0.5252	0.3992	0.3113	0.246	0.2794	0.3053	0.2224
5	2	neg_106	#N/A	UNPD26915	OCC(OC1OC(C(O)C(O)C1O)C(O)=O)C2OC(O)C(O)C(O)C2O	generic	InChI=1S/C13H22O13/c14-1-2(9-5(17)3(15)7(19)12(23)25-9)24-13-8(20)4(16)6(18)10(26-13)11(21)22/h2-10,12-20,23H,1H2,(H,21,22)	DMKJXRLRPWAHAN-UHFFFAOYSA-N	C13H22O13	Saccharides	Monosaccharides	Carbohydrates	3	7.0952		generic_?	UNPD=UNPD26915,COCONUT=CNP0224048	53.00246:7007 55.0183:41824 57.03401:309185 57.50497:6073 58.00547:22312 58.03739:15266 58.79113:4702 59.01332:141640 60.01662:5839 61.98785:14387 64.69532:4957 66.68663:4360 67.01859:8239 68.50087:13713 68.99783:31105 69.03426:9982 71.01355:222124 72.01694:7942 72.99292:38811 73.02922:30653 75.00863:15940 75.8573:4413 78.95892:52552 80.96521:10482 83.01381:68146 84.02168:150259 85.0295:946522 86…	[M-C6H8O6-H]-	1.124	209.06639	2.5039	2.4174	2.3983	4.7013	3.1476	3.9213	5.3927	3.7663	5.2155	3.6883	1.7902	5.932	4.2789	5.4331	2.6576	3.2156	3.9961	3.5364	2.977	3.5322	7.2673	6.2986	3.1656	2.1121	3.826	0.4981	0.9149	1.639
2	1	neg_11	#N/A	(IROA) SUCCINATE	OC(=O)CCC(O)=O	Unknown	InChI=1S/C4H6O4/c5-3(6)1-2-4(7)8/h1-2H2,(H,5,6)(H,7,8)	KDYFGRWQOYBRFD-UHFFFAOYSA-N	C4H6O4	Fatty Acids and Conjugates	Dicarboxylic acids	Fatty acids	2		80.5	generic_?	Unknown	53.25256:2537 67.54484:2427 68.0555:4778 73.02932:166374 74.03281:6911 75.003:5330 75.37801:2643 88.0049:2860 98.02488:4521 99.00845:16281 99.92583:507159 100.92581:91622 100.93243:6538 101.92413:23485 101.92978:4290 116.92119:102696 116.92819:1936667 117.01908:27575 117.91907:24370 117.9283:289638 118.05069:9971 118.92588:70075 118.93284:13179	[M-H]-	1.829	117.01899	5.5486	5.436	5.2509	5.4033	5.8244	4.6651	4.8286	4.7053	4.9955	6.2059	6.4012	6.1668	6.1894	3.3626	4.2406	2.4847	3.0838	2.9487	4.2048	4.6755	3.4454	3.3458	3.9439	4.7203	3.6409	7.5155	5.5772	4.2259
3	1	neg_112	#N/A	3-(5-Hydroxymethyl-5-methyl-2-oxo-5H-furan-3-yl)-2-methylpropanoic acid	CC(CC1=CC(C)(CO)OC1=O)C(O)=O	family	InChI=1S/C10H14O5/c1-6(8(12)13)3-7-4-10(2,5-11)15-9(7)14/h4,6,11H,3,5H2,1-2H3,(H,12,13)	LSXSSWIWLWKOPS-UHFFFAOYSA-N	C10H14O5	Linear polyketides	Open-chain polyketides	Polyketides	3	5.5827		family_1a	dnp:DMQ48	57.03386:1397 59.01328:11722 61.98788:25632 62.90511:1170 68.33528:1497 68.33839:2267 68.4035:1256 77.39084:1009 78.91893:1416 78.95913:5653 79.9573:5936 80.61767:931 82.954:1446 83.05014:2237 84.9511:1290 96.3457:1162 97.066:1758 103.92049:1135 107.07042:1111 115.92046:2605 122.89392:8085 122.96938:1227 123.08114:25741 124.08447:2304 124.949:80848 125.09669:16405 126.09985:2022 126.94468:3803 13…	[M-H]-	5.209	213.07674	2.6272	2.6656	2.611	3.7885	2.9014	3.6893	3.4794	3.6942	3.5733	3.3465	3.9234	3.4789	5.4655	2.5287	1.9564	2.1216	2.1009	1.9868	2.8233	3.8458	2.8494	3.8641	2.9838	1.3177	0.995	0.892	0.9311	0.849
4	1	neg_115	#N/A	Undecanedioic acid	OC(=O)CCCCCCCCCC(O)=O	Unknown	InChI=1S/C11H20O4/c12-10(13)8-6-4-2-1-3-5-7-9-11(14)15/h1-9H2,(H,12,13)(H,14,15)	LWBHHRRTOZQPDM-UHFFFAOYSA-N	C11H20O4	Fatty Acids and Conjugates	Dicarboxylic acids	Fatty acids	2		81.4	generic_?	Unknown	57.03401:9823 59.3461:1792 61.98793:27737 68.33163:3032 68.33485:1979 70.71854:1760 71.0499:2107 78.91872:2397 78.95876:2630 79.95728:2541 80.91695:2338 80.96481:1878 95.95969:1552 97.06562:1610 103.40738:1931 115.92078:1851 116.92824:2463 122.89405:3076 125.09701:10179 126.09995:2158 126.94507:1903 134.00664:2052 135.011:2454 136.00278:2106 151.11209:4850 153.1282:326552 154.13153:35737 159.9365…	[M-H]-	8.035	215.12863	0.4577	0.3985	0.3629	0.513	4.54	0.337	0.5608	0.6453	5.4656	0.2703	0.1712	1.1643	0.2062	0.2385	0.3905	0.3058	0.2329	0.3535	0.2447	0.374	0.3668	0.1511	0.3111	0.1488	0.3807	0.1362	0.1059	0.2253
6	1	neg_125	#N/A	Unknown		Unknown	Unknown	Unknown	Unknown	Unknown	Unknown	Unknown	4			?_?	Unknown	55.35707:1069 61.98795:11938 68.13944:3475 78.95886:5359 82.4808:980 83.18984:936 90.99186:1400 92.05862:990 94.02958:1810 94.98105:1099 134.39342:1009 138.96448:10966 139.93675:1040 154.95938:4531 160.97549:1112 161.2429:1126 164.90604:1208 164.91864:1069 166.95924:2776 171.92555:1848 172.93781:5789 180.83099:3951 180.95592:975 182.95441:24091 184.06053:1202 184.93776:2100 185.9292:1302 195.0333…	[M-H]-	2.426	227.06726	0.372	0.347	0.3659	0.0241	0.0516	0.0783	0.0428	0.0824	0.036	0.1155	0.1016	0.0493	0.1751	0.0327	0.0228	0.0404	0.0555	0.0236	1.1187	0.3325	0.5657	0.6943	0.7887	0.0307	0.0291	0.0716	0.0441	0.0673
7	1	neg_127	#N/A	Talaromycin A	CCC1CCC2(CC(O)C(CO)CO2)OC1	generic	InChI=1S/C12H22O4/c1-2-9-3-4-12(15-7-9)5-11(14)10(6-13)8-16-12/h9-11,13-14H,2-8H2,1H3	VDWRKBZMQNPUOB-UHFFFAOYSA-N	C12H22O4	Aromatic polyketides	Usnic acid and derivatives	Polyketides	3	6.3501		generic_?	HMDB=HMDB0030143,KNApSAcK=C00040437;C00040438;C00040439;C00040440;C00040441;C00040442,FooDB=FDB001951;FDB012061;FDB012353;FDB012839;FDB012840;FDB012841,UNPD=UNPD137690;UNPD144929;UNPD145734;UNPD153644;UNPD38033;UNPD48233;UNPD49074;UNPD78213;UNPD96456,NPA=NPA019269,COCONUT=CNP0408372	50.68668:1308 53.75699:1128 54.9663:1214 55.5071:1153 57.034:3962 61.98782:5179 67.99495:5629 71.04987:1581 97.78044:1160 122.96983:2046 132.86742:32058 138.94453:1556 138.96455:15504 139.11273:4079 140.96053:5030 144.5031:1413 148.99086:2375 154.95934:9822 156.95538:4044 165.12796:6180 166.95935:3988 167.14369:228973 168.14709:28354 172.93825:2252 174.93137:3267 181.89728:1686 182.95424:34998 18…	[M-H]-	8.758	229.14421	0.5716	0.4782	0.4004	0.5694	8.7229	0.2832	0.5242	0.679	3.1736	0.2809	0.1275	1.6268	0.1886	0.2456	0.4019	0.2448	0.2109	0.3243	0.2331	0.3361	0.3163	0.1741	0.2421	0.1478	0.3965	0.114	0.1025	0.2179
8	1	neg_138	#N/A	Unknown		Unknown	Unknown	Unknown	Unknown	Unknown	Unknown	Unknown	4			?_?	Unknown	52.0456:1160 55.95657:1307 59.28926:1010 61.9879:19328 68.35783:1490 68.3612:3278 78.95892:3859 96.00916:1394 99.92556:1783 103.91968:2228 104.95199:1086 106.59175:1180 110.06057:1729 125.03495:2266 134.89464:2304 140.97227:1131 146.96005:1974 151.05069:3208 152.72795:1156 156.9671:3876 174.95602:2220 181.15991:1581 184.88925:2741 184.96124:6086 186.8858:1903 187.70558:1473 196.96121:2724 197.906…	[M-H]-	3.148	241.08299	0.8521	0.7875	0.7971	0.8491	0.6167	0.534	0.8594	2.7438	0.366	0.6297	0.4123	0.7997	0.8147	0.3217	0.3938	0.4038	0.5794	0.4312	1.5214	1.0467	0.6474	0.9293	1.2888	0.345	0.3728	1.0199	0.4474	0.4708
10	1	neg_142	#N/A	Brassylic acid - 40.0 eV	OC(=O)CCCCCCCCCCCC(O)=O	Unknown	InChI=1S/C13H24O4/c14-12(15)10-8-6-4-2-1-3-5-7-9-11-13(16)17/h1-11H2,(H,14,15)(H,16,17)	DXNCZXXFRKPEPY-UHFFFAOYSA-N	C13H24O4	Fatty Acids and Conjugates	Dicarboxylic acids	Fatty acids	2		80.8	generic_?	Unknown	57.03398:4127 60.54613:1348 61.98791:42734 78.95898:1545 83.05033:1550 87.00874:1505 92.72541:1350 117.7192:1322 119.92359:1738 120.89256:1689 122.45718:1381 123.37755:1394 146.96127:3250 153.1279:1714 162.1958:1356 174.95639:3050 179.14362:3569 181.15967:199233 182.16306:29411 183.16531:2074 197.90498:7288 199.17043:4407 210.47098:1276 219.07333:1454 225.14954:290805 226.15289:44386 227.15543:37…	[M-H]-	9.443	243.15994	0.7768	0.655	0.5843	0.9914	8.9363	0.5256	0.756	1.0753	4.2169	0.491	0.1729	2.386	0.3017	0.3982	0.7192	0.4379	0.3487	0.463	0.4041	0.4966	0.4648	0.3003	0.396	0.2058	0.6416	0.2014	0.1786	0.3469
12	1	neg_15	#N/A	p-Toluquinone	CC1=CC(=O)C=CC1=O	generic	InChI=1S/C7H6O2/c1-5-4-6(8)2-3-7(5)9/h2-4H,1H3	VTWDKFNVVLAELH-UHFFFAOYSA-N	C7H6O2	Aromatic polyketides	Benzoquinones	Polyketides	3	8.2216		generic_?	KNApSAcK=C00023719,ECMDB=ECMDB20358,UNPD=UNPD166537,COCONUT=CNP0221358	61.98787:2794 65.03921:4271 68.48838:3543 68.49175:2525 91.01903:17821 92.02681:3322 93.03465:36583 93.14589:1587 94.03008:1922 94.03785:4217 95.01399:18062 95.0502:3500 106.14404:1911 108.02145:53691 108.937:15046 109.02445:4255 110.93383:8883 112.95574:4139 120.89742:2630 121.02906:2027562 122.03239:189787 122.89375:53156 122.90688:3722 123.00816:4044	[M-H]-	5.24	121.02909	1.9088	1.9718	2.1535	1.3783	1.2829	0.9595	1.2041	1.7842	0.9955	1.1281	0.9145	1.2305	1.39	2.0385	2.1391	2.3162	2.6457	1.9662	4.1526	3.9379	1.7363	1.8006	3.6517	2.652	2.3114	3.3511	4.4178	3.262
248	10	neg_153	#N/A	daidzein	Oc1ccc(cc1)-c2coc3cc(O)ccc3c2=O	genus	InChI=1S/C15H10O4/c16-10-3-1-9(2-4-10)13-8-19-14-7-11(17)5-6-12(14)15(13)18/h1-8,16-17H	ZQSIJRDFPHDXIC-UHFFFAOYSA-N	C15H10O4	Isoflavonoids	Isoflavones	Shikimates and Phenylpropanoids	3	7.0445		genus_1a	dnp:CMR01|chebi:28197|hmdb:HMDB0003312|knapsack:C00009380|lipid maps:LMPK12050038|plantcyc:DAIDZEIN|t3db:T3D3964|unpd:UNPD117319|beilstein registry number:231523|biocyc:2-HYDROXYDAIDZEIN|bmdb:BMDB03312|cas:486-66-8|chembl:CHEMBL8145|chemspider:4445025|foodb:FDB002608|kegg compounds:C10208|kegg ligand:C10208|lincs:LSM-2935|metabolights:MTBLC28197|metacyc:DAIDZEIN|phenol explorer compound:394|pmid:…	55.32706:1572 56.50787:1783 61.98784:2561 78.95824:1734 78.99806:3963 89.03978:6095 91.01906:59352 92.0224:2851 93.03461:6149 97.38155:2703 117.03421:283639 118.03759:23072 119.01111:4544 119.03826:1686 119.04128:2911 119.04975:28832 122.98727:4733 132.02078:3589 133.02911:52890 134.03256:3850 135.00839:113995 136.01178:8125 146.96075:3869 149.02477:2208 153.01891:19826 161.16835:1540 163.00102:5…	[M-H]-	7.191	253.05063	0.8499	0.7654	0.8576	0.9785	0.6995	0.8973	1.2193	4.1442	0.4877	1.138	0.8358	1.0309	2.1695	0.5742	0.365	0.4156	0.485	0.3629	1.4349	0.7965	1.0566	1.0062	0.8979	0.3008	0.3117	0.3764	0.3203	0.3885
13	1	neg_158	#N/A	Unknown		Unknown	Unknown	Unknown	Unknown	Unknown	Unknown	Unknown	4			?_?	Unknown	52.72375:952 57.03387:1837 61.98792:6486 68.72082:2324 75.33599:1263 78.95902:2494 120.95341:1622 122.96957:16874 136.94878:2565 138.96443:36335 139.96384:1958 154.95921:15840 157.70447:1186 166.95947:37218 167.96036:1593 174.93047:2071 178.23349:1059 182.95441:53513 183.95384:3080 193.15852:1212 195.17505:79826 196.17815:11441 200.93243:4722 202.92542:3412 210.94936:122724 211.95013:9829 212.202…	[M-H]-	9.088	256.19168	0.121	0.1413	0.1249	0.0824	3.2901	0.0233	0.0987	0.1645	0.9541	0.0411	0.0107	0.5286	0.0225	0.0363	0.0668	0.0726	0.0363	0.0499	0.0345	0.0259	0.0377	0.0254	0.0353	0.0162	0.0582	0.0091	0.0201	0.0239
15	1	neg_166	#N/A	Unknown		Unknown	Unknown	Unknown	Unknown	Unknown	Unknown	Unknown	4			?_?	Unknown	58.0293:14933 59.01329:7254 61.98789:2738 66.73142:10735 68.06265:977 70.02952:13572 72.04523:4096 74.02454:126294 75.02794:2139 78.95895:4494 84.04546:4077 86.02476:1232 92.05053:4153 93.03446:1552 98.02475:34501 99.00924:1246 99.02795:1331 113.09584:1097 114.01892:1433 116.03493:60787 117.0384:2664 118.02917:1767 128.0349:13663 129.013:5019 130.0656:1521 131.03735:20024 132.04512:44276 133.0482…	[M-H]-	4.544	261.08823	0.7033	0.6788	0.6628	0.7012	0.6148	0.7809	0.7023	0.7308	0.7729	0.804	0.6668	0.8653	1.0755	1.1898	0.4606	0.7309	0.7448	0.7634	0.6114	0.4764	0.8284	1.0037	0.6171	0.7659	0.7247	0.2584	0.5524	0.5185
16	1	neg_171	#N/A	UNPD4687	OCc1coc2c1oc3c2C(=O)c4c(cccc4)C3=O	generic	InChI=1S/C15H8O5/c16-5-7-6-19-15-10-11(17)8-3-1-2-4-9(8)12(18)14(10)20-13(7)15/h1-4,6,16H,5H2	VRXWMQLHEBPAGK-UHFFFAOYSA-N	C15H8O5	Naphthalenes	Naphthoquinones	Polyketides	3	6.395		generic_?	UNPD=UNPD4687,COCONUT=CNP0237811	59.01325:1628 61.98768:1830 63.40998:1462 67.10909:9133 75.07181:1515 77.79261:1373 77.99154:1247 80.96484:2385 86.75964:1297 91.01898:3276 97.47729:1467 98.9558:5090 117.03435:2611 135.00851:15196 138.97665:2569 148.96135:9919 149.02373:2267 154.97166:10618 156.9695:1842 166.97203:14274 167.04924:8347 171.04478:2547 172.33844:1430 182.03659:1492 182.96675:7056 183.0442:5671 184.04758:1857 192.95…	[M-H]-	6.69	267.03	0.4526	0.5045	0.4635	0.0094	0.0	0.0	0.0	0.0189	0.0	0.0	0.0139	0.0	0.0055	0.3414	0.3034	0.187	0.1345	0.1786	0.4018	0.7132	0.6919	1.1698	0.4917	0.0998	0.0	0.0961	0.0517	0.0679
17	1	neg_174	#N/A	8-hydroxy-1-methoxy-3-methylanthracene-9,10-dione	COc1c2C(=O)c3c(cccc3O)C(=O)c2cc(C)c1	family	InChI=1S/C16H12O4/c1-8-6-10-14(12(7-8)20-2)16(19)13-9(15(10)18)4-3-5-11(13)17/h3-7,17H,1-2H3	KVRUANCWPQJDMF-UHFFFAOYSA-N	C16H12O4	Polycyclic aromatic polyketides	Anthraquinones and anthrones	Polyketides	3	5.4597		family_1a	dnp:FYH75|hmdb:HMDB0033036|unpd:UNPD163037|cas:67116-22-7|chemspider:10408856|foodb:FDB011028|pubchem cid:13412789	55.08357:1566 61.98789:2061 63.02354:3289 65.00273:1907 68.07404:6704 91.01915:4440 95.46062:1832 96.96018:1926 97.83563:1894 98.95586:6038 107.01382:2637 108.02164:1937 114.25816:1682 117.03429:5977 120.96678:2563 132.02121:26068 133.99202:3411 135.00832:11011 136.96103:2050 138.9769:2226 148.96129:4704 149.02316:2477 151.00296:1827 154.95996:2657 154.97177:11467 161.27986:1670 164.95656:2330 16…	[M-H]-	6.526	267.06653	0.5361	0.5272	0.5006	0.1891	0.1087	0.2279	0.189	0.1955	0.161	0.3079	0.3236	0.2935	0.4389	1.7116	1.1756	1.2434	0.8446	1.3852	1.191	1.3162	1.1876	1.9744	1.478	0.2481	0.173	0.0818	0.0589	0.1521
18	1	neg_176	#N/A	2-(alpha-D-mannosyl)-D-glyceric acid	OCC(OC1OC(CO)C(O)C(O)C1O)C(O)=O	generic	InChI=1S/C9H16O9/c10-1-3-5(12)6(13)7(14)9(17-3)18-4(2-11)8(15)16/h3-7,9-14H,1-2H2,(H,15,16)	DDXCFDOPXBPUJC-UHFFFAOYSA-N	C9H16O9	Fatty acyl glycosides	Fatty acyl glycosides of mono- and disaccharides	Carbohydrates|Fatty acids	3	5.8088		generic_?	ChEBI=CHEBI:15847;CHEBI:57541;CHEBI:62509;CHEBI:62510,ECMDB=ECMDB20063,PubChem=25202897;25201212;5460194,PlantCyc=2-O-ALPHA-MANNOSYL-D-GLYCERATE,UNPD=UNPD116056;UNPD156756;UNPD164446;UNPD181506,BLEXP=BLEXPDB00000443262,COCONUT=CNP0224061	51.1033:1008 53.07656:964 53.19035:1020 58.42181:1084 61.98779:2841 62.4317:1118 63.73061:1019 68.48183:2298 68.48497:2144 76.37997:989 77.61723:1056 78.95884:2724 80.96506:1415 81.83885:1025 92.02542:11227 93.02946:1277 96.96:1813 98.95581:6269 98.96449:1336 105.5201:1141 108.01995:6296 113.03184:1276 114.95123:1598 117.77195:1051 118.06112:1360 126.03086:1690 133.99187:1990 135.03082:403404 136…	[M-H]-	2.549	267.0737	0.5332	0.5438	0.5529	0.1632	0.1562	0.2089	0.4306	0.1805	0.1062	0.2118	0.2191	0.2114	0.3944	0.1077	0.0675	0.0773	0.0865	0.0767	1.2643	0.7744	1.6119	1.0837	0.5945	0.0438	0.0712	0.0828	0.0746	0.0657
19	1	neg_177	#N/A	2-(alpha-D-mannosyl)-D-glyceric acid	OCC(OC1OC(CO)C(O)C(O)C1O)C(O)=O	generic	InChI=1S/C9H16O9/c10-1-3-5(12)6(13)7(14)9(17-3)18-4(2-11)8(15)16/h3-7,9-14H,1-2H2,(H,15,16)	DDXCFDOPXBPUJC-UHFFFAOYSA-N	C9H16O9	Fatty acyl glycosides	Fatty acyl glycosides of mono- and disaccharides	Carbohydrates|Fatty acids	3	6.1025		generic_?	ChEBI=CHEBI:15847;CHEBI:57541;CHEBI:62509;CHEBI:62510,ECMDB=ECMDB20063,PubChem=25202897;25201212;5460194,PlantCyc=2-O-ALPHA-MANNOSYL-D-GLYCERATE,UNPD=UNPD116056;UNPD156756;UNPD164446;UNPD181506,BLEXP=BLEXPDB00000443262,COCONUT=CNP0224061	61.98791:3141 65.99807:1270 68.21225:3565 71.7607:1076 72.56857:1130 78.95908:2693 80.96521:1267 90.61417:1046 96.96004:2778 98.95587:5740 108.01999:43302 109.0234:1607 120.93707:1214 120.96525:1141 122.22916:1135 126.031:1238 128.96693:1212 132.96663:1286 133.99117:2660 136.96059:1424 138.97682:3198 148.96115:11981 150.01729:2641 151.0257:688434 152.03017:36975 152.91718:1921 153.03052:2512 154.…	[M-H]-	2.927	267.07385	0.8482	0.9034	0.8763	1.1673	0.9615	0.9951	1.2412	1.0943	1.2166	1.0877	1.0329	1.0391	1.2998	0.7837	0.5878	0.9279	0.9576	0.7809	0.9966	0.7955	0.7556	1.1401	0.9938	0.3727	0.4075	0.288	0.3272	0.3373
20	1	neg_181	#N/A	Unknown		Unknown	Unknown	Unknown	Unknown	Unknown	Unknown	Unknown	4			?_?	Unknown	54.17742:1457 57.03409:1700 59.0134:1813 66.62698:1492 66.66814:16601 74.9735:1649 84.02167:2125 84.9752:2942 105.51995:1494 130.99271:1509 141.21167:1669 144.29445:1634 144.78603:1526 161.23247:1809 187.74805:1437 197.19124:2602 221.18932:3099 223.20668:8555 224.21002:1930 225.22218:184590 226.22545:35003 227.22891:2303 253.21819:4465 271.22815:324805 272.2316:64067 272.26123:3439	[M-H]-	12.608	271.22824	0.7769	0.5876	0.5549	0.7058	1.7637	0.8569	1.0451	1.7417	0.719	1.0585	0.4191	3.4065	1.1947	0.702	0.5614	0.8287	0.2389	0.8417	1.2026	0.8404	1.0039	2.1369	2.1679	0.816	0.8133	0.1784	0.4765	0.6464
21	1	neg_184	#N/A	Unknown		Unknown	Unknown	Unknown	Unknown	Unknown	Unknown	Unknown	4			?_?	Unknown	58.0293:101999 59.03259:2467 61.98782:6827 63.99968:1375 67.98927:5571 68.99538:4043 72.00881:2441 74.02459:5918 78.95882:1659 82.0298:2947 83.06139:4586 84.04538:12331 97.04018:1412 97.3375:1273 98.0246:3814 101.07185:25005 107.02484:3528 107.06071:1784 109.04038:6883 112.98525:3911 125.03571:8750 125.07164:123872 126.07523:5713 127.05094:157508 127.55228:1269 128.0349:40025 128.05437:9410 129.0…	[M-H]-	4.269	273.1459	0.0792	0.0709	0.0736	0.0	5.3392	0.0734	0.0	0.0	0.0	0.0	0.0048	0.0	0.0	0.0	0.0	0.0655	0.0	0.0	0.0	0.0	0.0	0.0	0.0	0.0	0.0	0.0	0.0	0.0
22	1	neg_196	#N/A	Brazilein	Oc1cc2c(cc1)C3=C4C=C(O)C(=O)C=C4CC3(O)CO2	family	InChI=1S/C16H12O5/c17-9-1-2-10-14(4-9)21-7-16(20)6-8-3-12(18)13(19)5-11(8)15(10)16/h1-5,17,19-20H,6-7H2	MLWIYODOURBGPI-UHFFFAOYSA-N	C16H12O5	Isoflavonoids	Pterocarpan	Shikimates and Phenylpropanoids	3	6.6178		family_1a	dnp:CSO35	61.98789:17754 68.0006:1161 68.00397:4835 78.95868:2166 91.01899:18649 92.02214:1202 93.03429:3574 108.02155:1244 108.2207:1099 109.02909:2914 115.30766:1026 126.90323:3054 132.02103:3383 133.02884:1695 135.00838:51944 136.01161:3671 147.00815:3669 148.01631:3072 150.36423:1000 151.0396:3719 153.01941:6900 154.89774:3140 161.12778:1081 161.22577:1412 171.04517:1385 176.01021:2530 180.05765:1685 1…	[M-H]-	6.728	283.06143	0.4325	0.4483	0.4217	0.0145	0.0137	0.0106	0.0241	0.0573	0.0235	0.0199	0.0685	0.0655	0.0783	0.4872	0.5324	0.3691	0.242	0.398	0.5783	0.8418	0.6277	0.7427	0.6807	0.3629	0.215	0.3363	0.2897	0.3009
23	1	neg_200	#N/A	3,4,5-trihydroxyoxan-2-yl 3,4-dihydroxybenzoate	OC1COC(OC(=O)c2ccc(O)c(O)c2)C(O)C1O	family	InChI=1S/C12H14O8/c13-6-2-1-5(3-7(6)14)11(18)20-12-10(17)9(16)8(15)4-19-12/h1-3,8-10,12-17H,4H2	VWQASRWQZBVNEI-UHFFFAOYSA-N	C12H14O8	Phenolic acids (C6-C1)	Simple phenolic acids	Shikimates and Phenylpropanoids	3	6.3021		family_1a	dnp:NMV71|hmdb:HMDB0041272|cas:143986-30-5|chemspider:26502885|foodb:FDB021184|pubchem cid:53462251	52.00118:1404 61.98787:3829 68.7268:3062 73.34122:1289 78.95892:1671 79.95737:1513 81.03447:3746 85.02948:4560 93.03445:2379 95.01384:5953 98.88016:1491 99.92551:1639 104.73955:1335 108.02141:469768 109.02367:15509 109.02907:39039 110.02581:1913 110.03247:3793 121.02876:1955 123.00827:5241 127.5249:1526 130.06578:5815 133.02919:3280 134.03687:1639 135.04463:1668 143.04956:3806 151.03996:7053 152.…	[M-H]-	3.82	285.06183	2.1624	2.1883	2.4675	0.1434	0.1073	0.2279	0.1257	0.2247	0.1762	0.3104	0.267	0.1945	0.2881	3.8623	2.501	2.2066	2.0913	2.0445	2.1856	2.491	1.7891	3.2871	2.8249	3.0079	2.9091	3.4516	2.5974	4.5499
24	1	neg_205	#N/A	Unknown		Unknown	Unknown	Unknown	Unknown	Unknown	Unknown	Unknown	4			?_?	Unknown	57.03409:7957 57.04543:995 61.98791:2709 63.14869:904 68.36842:3694 70.02962:8041 79.95718:2834 83.05001:1403 86.02465:1275 92.86442:1068 95.05045:1250 96.96026:1427 97.06594:14481 98.02488:2788 103.92002:2345 118.96595:2227 120.06623:10438 123.08132:10013 125.09687:183412 126.10023:17164 132.98116:1650 143.10777:2145 146.96112:3651 159.981:1236 162.1293:1582 169.08638:3215 171.1028:1633 174.9557…	[M-H]-	5.145	290.16144	0.0337	0.0296	0.0296	0.0	0.0	0.0	0.0	0.0	2.054	0.0	0.0066	0.0	0.0052	0.0	0.0	0.0	0.0	0.0	0.0	0.0	0.0	0.0	0.0	0.0	0.0	0.0	0.0	0.0
25	1	neg_208	#N/A	Unknown		Unknown	Unknown	Unknown	Unknown	Unknown	Unknown	Unknown	4			?_?	Unknown	51.18024:1193 55.01826:2135 57.0341:1826 58.00545:9967 59.01333:50444 61.98787:2213 67.99424:3789 68.87224:1114 71.01357:69844 72.99287:17657 73.02921:3096 75.0087:1901 77.53894:1236 79.95727:1272 81.24815:1165 83.01386:5540 85.02953:15280 85.06088:2468 85.06586:36161 86.0693:2475 87.00893:6946 89.02451:51471 89.03009:2689 90.02818:1469 90.53799:1247 95.01392:4111 96.96001:45439 98.95584:1880 101…	[M-H]-	4.01	293.11462	1.1838	1.1859	1.1076	2.2858	1.4661	1.6241	2.1329	2.1476	1.6377	1.9612	2.1612	1.5704	3.089	0.8437	0.9852	0.7964	0.9696	0.864	0.8909	0.7948	0.8531	0.909	0.7629	0.7448	0.7787	0.9399	0.8458	0.9561
26	1	neg_209	#N/A	Ethyl (S)-3-hydroxybutyrate glucoside	CCOC(=O)CC(C)OC1OC(CO)C(O)C(O)C1O	generic	InChI=1S/C12H22O8/c1-3-18-8(14)4-6(2)19-12-11(17)10(16)9(15)7(5-13)20-12/h6-7,9-13,15-17H,3-5H2,1-2H3	HEBPYQNXDMDRKR-UHFFFAOYSA-N	C12H22O8	Fatty acyl glycosides	Fatty acyl glycosides of mono- and disaccharides	Fatty acids	3	6.9033		generic_?	HMDB=HMDB0031693,FooDB=FDB008356,LipidMAPS=LMFA13010042,UNPD=UNPD166586,COCONUT=CNP0291276	53.48368:2023 55.01822:4662 57.03387:5368 58.00546:17803 59.01333:107736 60.01666:2822 61.98766:3529 68.06335:9556 71.01354:135646 72.01689:4502 72.99282:32873 73.02928:5865 83.0139:9005 85.02959:28434 85.06586:80908 86.06908:4997 87.00874:11249 89.02449:102930 95.01384:8059 96.95999:41128 99.0089:3165 99.08186:3848 101.0176:3623 101.02428:72778 101.3522:2199 102.02748:4065 105.53854:2416 113.024…	[M-H]-	4.199	293.12463	2.6381	2.6619	2.4628	2.3826	1.7427	1.7666	2.1716	2.1494	2.0363	2.0775	1.706	1.894	2.5442	3.714	3.4473	4.131	3.5354	3.8215	2.7572	2.914	2.8087	4.1501	2.5801	2.6187	4.2249	1.6651	3.0127	2.5948
27	1	neg_217	#N/A	UNPD155391	CC(O)(CO)C(CO)OC1OC(CO)C(O)C(O)C1O	generic	InChI=1S/C11H22O9/c1-11(18,4-14)6(3-13)20-10-9(17)8(16)7(15)5(2-12)19-10/h5-10,12-18H,2-4H2,1H3	XKZOKVHVBVCYHA-UHFFFAOYSA-N	C11H22O9	O-glycosyl compounds	O-glycosyl compounds	Unknown	3	5.5266		generic_?	UNPD=UNPD155391,COCONUT=CNP0333805	56.07383:1970 61.98796:13017 68.59766:6793 78.95876:3192 79.1524:2171 79.95738:8697 92.44845:1957 102.45448:2300 119.04958:3439 122.80028:2074 138.92781:2233 142.96587:4064 144.54001:2199 161.23643:2447 166.92409:2605 170.00389:4012 183.0118:334424 184.01675:40663 185.00682:12936 191.94597:5012 197.02719:16035 210.95436:2244 216.00972:33901 217.01224:4256 225.05846:3223 230.02521:4637 233.19107:4…	[M-H]-	2.445	297.11938	1.5576	1.5453	1.5691	1.9263	1.1095	2.0671	1.8117	1.713	1.9904	2.8114	1.84	2.543	2.9283	1.3506	1.0187	1.334	1.5467	1.402	1.5298	1.4212	1.4266	1.6798	1.515	0.7233	1.4048	0.3857	0.6465	0.8282
203	2	neg_228	#N/A	sativanone	COc1ccc(C2COc3cc(O)ccc3C2=O)c(OC)c1	genus	InChI=1S/C17H16O5/c1-20-11-4-6-12(15(8-11)21-2)14-9-22-16-7-10(18)3-5-13(16)17(14)19/h3-8,14,18H,9H2,1-2H3	JOVYBWHPTQRVNZ-UHFFFAOYSA-N	C17H16O5	Isoflavonoids	Isoflavanones	Shikimates and Phenylpropanoids	3	6.8704		genus_1a	dnp:BXC17|hmdb:HMDB0038110|knapsack:C00009537|lipid maps:LMPK12050464|cas:70561-31-8|chemspider:10289893|foodb:FDB017335|pubchem cid:13886678	53.74086:1372 57.03431:1647 61.98783:4008 65.00302:1796 66.47829:13739 66.48231:8018 66.99766:1504 91.01905:140810 92.02235:8618 97.37341:2779 107.01356:4921 108.02161:16292 111.77592:1670 119.04969:2858 121.02921:5727 123.00816:3557 133.02922:2607 135.00839:326566 136.01114:24261 137.01315:2593 148.01598:3386 153.01891:52402 154.02206:5999 161.02391:24871 162.02904:2846 180.006:5504 183.8623:170…	[M-H]-	7.584	299.09259	0.3564	0.3513	0.3511	0.0	0.0	0.0	0.0	0.0	0.0	0.0	0.0	0.0	0.0061	0.0	0.0103	0.0	0.0	0.0	0.6369	0.2636	1.6006	1.4352	0.423	0.0421	0.0132	0.036	0.0152	0.0293
29	2	neg_23	#N/A	(S)-4,5-dihydroxypentane-2,3-dione	CC(=O)C(=O)C(O)CO	generic	InChI=1S/C5H8O4/c1-3(7)5(9)4(8)2-6/h4,6,8H,2H2,1H3	UYTRITJAZOPLCZ-UHFFFAOYSA-N	C5H8O4	Monosaccharides	Monosaccharides	Unknown	3	6.8547		generic_?	ChEBI=CHEBI:29484,ECMDB=ECMDB20550,PubChem=25200942;11170991,BLEXP=BLEXPDB00000443434,COCONUT=CNP0082869	51.62662:1558 52.97647:1504 54.7269:1563 61.62828:1481 62.05107:1727 65.11312:1407 66.92703:4468 66.93098:7719 69.03426:4576 71.01364:5300 72.99276:2278 87.04518:55387 88.04851:4210 88.98267:5276 90.97144:2581 94.99307:5853 102.97121:2167 105.95847:2817 107.3127:1434 112.52579:1482 113.02398:5058 114.60265:1537 115.00327:10269 115.92019:4296 118.96581:102138 119.96936:2239 130.86821:4080 131.0344…	[M-H]-	2.8	131.03458	0.7696	0.6728	0.74	0.4681	0.5394	0.4712	0.4907	0.4304	0.5109	0.4166	0.4249	0.502	0.4065	0.7087	0.6427	0.5702	0.5003	0.6556	0.5373	0.5976	0.5498	0.464	0.4776	1.286	0.8154	0.8146	1.3846	0.8738
30	1	neg_231	#N/A	Unknown		Unknown	Unknown	Unknown	Unknown	Unknown	Unknown	Unknown	4			?_?	Unknown	59.23779:903 61.98795:5163 62.10292:1266 63.31611:1037 66.7048:11003 69.03423:3708 71.01347:2016 78.95888:1238 79.01889:1240 79.85452:1098 81.03445:2044 83.01369:3258 95.01391:3639 97.0293:5733 97.38022:1296 101.55949:1111 103.78818:1167 107.0137:1818 115.00328:3257 123.00842:9326 124.01615:37447 125.02405:103647 126.02744:8030 136.99986:1372 137.72044:1074 144.04497:14145 149.99539:55451 151.001…	[M-H]-	3.45	301.05661	0.3778	0.3877	0.4411	0.0	0.0	0.0	0.0	0.0	0.0	0.0	0.0084	0.0	0.0	0.5283	0.4402	0.3436	0.2479	0.2864	0.3791	0.6085	0.6197	0.9396	0.4426	0.3963	0.194	0.3062	0.1977	0.3515
31	1	neg_234	#N/A	Unknown		Unknown	Unknown	Unknown	Unknown	Unknown	Unknown	Unknown	4			?_?	Unknown	52.44349:962 61.98789:3444 68.07696:4184 69.40042:1052 71.01376:997 78.95899:5836 90.9239:1108 95.37945:1098 96.96006:2445 107.92657:1182 108.93651:1293 111.01958:63832 112.02298:2979 115.92042:1590 118.9657:4308 128.03482:1755 143.04543:2674 145.00797:1580 146.96065:16010 152.91681:1228 156.94844:1237 160.00768:1340 160.01978:1147 160.88345:1041 174.95576:19609 180.93901:1448 200.99828:2294 224.…	[M-H]-	1.611	305.01819	0.5872	0.5532	0.4783	2.6408	4.1945	1.8636	3.0316	2.4715	1.3614	1.8745	1.2931	3.5483	1.7823	0.4793	0.2165	0.3165	0.2835	0.4493	0.0235	0.1791	0.0806	0.1067	0.3204	0.392	0.2175	0.0031	0.077	0.3339
32	1	neg_236	#N/A	Unknown		Unknown	Unknown	Unknown	Unknown	Unknown	Unknown	Unknown	4			?_?	Unknown	50.50126:1302 56.37047:1322 57.03418:1434 59.01333:152109 60.01669:3852 61.9879:10081 67.42456:1317 68.72269:1525 68.72638:3143 73.62238:1239 79.95728:5180 80.96531:1710 85.02949:4578 89.02464:1365 96.96004:375724 97.06604:2342 97.95918:2790 98.95589:15508 98.96452:2948 102.97111:2972 114.15339:1448 118.96586:32934 129.01918:2404 130.96613:2419 133.95288:2292 134.84489:1198 135.08142:3064 146.960…	[M-H]-	4.678	305.07028	1.2471	1.1721	1.1592	1.6542	1.929	1.7089	1.4118	1.4662	1.63	1.4877	1.4749	1.7491	1.6874	1.5431	1.6874	1.6114	1.726	1.6248	1.4746	1.8976	1.449	1.87	1.3331	0.6321	1.1322	0.4451	0.816	0.6992
34	1	neg_240	#N/A	Diplodiatoxin	CC1CC(C)C2C(C1)C=C(C)C(C(O)=O)C2(C)C(=O)CCO	generic	InChI=1S/C18H28O4/c1-10-7-11(2)15-13(8-10)9-12(3)16(17(21)22)18(15,4)14(20)5-6-19/h9-11,13,15-16,19H,5-8H2,1-4H3,(H,21,22)	SFTQDPVLDKOILY-UHFFFAOYSA-N	C18H28O4	Cyclic polyketides	Decalins with side chains	Polyketides	3	6.7818		generic_?	HMDB=HMDB0031471,FooDB=FDB008044,UNPD=UNPD138898;UNPD58262;UNPD230636,BLEXP=BLEXPDB00012309246,NPA=NPA003789,COCONUT=CNP0236871	50.52348:982 57.03382:2176 59.01308:3895 61.98758:2697 68.4621:1814 68.46512:2498 69.0342:1176 79.95699:4234 80.02612:1496 81.03419:3520 83.01366:1536 83.04999:1349 83.16286:1285 91.68192:1201 95.05009:2405 96.95467:1791 96.96007:24094 97.02898:4852 97.0653:5328 109.06534:1516 118.96532:1602 121.06461:1869 122.97485:1769 123.04491:5937 123.08131:2430 125.09658:10690 137.09641:7170 141.12749:1881 …	[M-H]-	11.092	307.1918	0.4715	0.453	0.4807	0.6242	0.7537	0.7607	0.8437	1.5952	0.5012	0.9135	0.456	0.8333	1.1809	0.2286	0.1203	0.2072	0.2725	0.2563	0.7202	0.658	0.3056	1.0933	0.8288	0.2542	0.1488	0.1835	0.2649	0.267
37	1	neg_252	#N/A	2-(2,4-Dihydroxyphenyl)-4,6-dihydroxy-3-benzofurancarboxaldehyde; 2',6-Di-Me ether	COc1cc(O)c2c(oc(c2C=O)-c3c(OC)cc(O)cc3)c1	genus	InChI=1S/C17H14O6/c1-21-10-6-13(20)16-12(8-18)17(23-15(16)7-10)11-4-3-9(19)5-14(11)22-2/h3-8,19-20H,1-2H3	WXIUCUVIUKKTLJ-UHFFFAOYSA-N	C17H14O6	Isoflavonoids	2-arylbenzofurans	Shikimates and Phenylpropanoids	3	6.2177		genus_1a	dnp:PWT05	51.33497:1323 51.58519:1011 59.01332:1352 61.98785:5458 67.78382:1061 68.71964:2059 81.95326:1796 85.09727:994 105.54752:1207 135.00822:2535 139.70955:1160 139.90753:1170 140.94405:3520 146.95975:1205 155.91904:1846 172.00093:1284 174.95584:2320 183.01187:5665 183.04475:4446 183.91386:6551 184.01537:8673 184.93372:4891 185.0062:45765 186.01115:2543 189.56897:1119 199.02353:1483 211.03957:4027 218…	[M-H]-	10.492	313.07211	0.4246	0.4428	0.3786	0.0338	0.0	0.022	0.0	0.0574	0.0306	0.0834	0.1379	0.2267	0.1015	0.0466	0.0568	0.0559	0.0186	0.0786	0.044	0.1687	1.3227	1.533	0.1159	0.0265	0.0	0.0	0.0	0.0
39	1	neg_257	#N/A	Unknown		Unknown	Unknown	Unknown	Unknown	Unknown	Unknown	Unknown	4			?_?	Unknown	53.34306:7346 61.98784:15399 67.08059:54432 126.90454:2078894 131.18498:7011 172.02365:7311 231.36031:9080 276.03235:18153 316.73892:6466752 317.05634:11300 318.73706:3149677	[M-H]-	1.077	316.73898	33.1994	27.0119	23.5408	33.3674	28.0035	17.9298	28.022	26.1261	21.8871	18.9581	3.4369	20.2092	8.7064	29.582	58.1101	42.3286	34.33	38.1125	30.8065	44.9427	18.2903	18.8504	23.7197	19.7432	63.7685	18.9282	17.8227	26.7913
40	1	neg_26	#N/A	1-Deoxy-D-threo-pentulose;1-Deoxy-D-xylulose;D-1-Deoxyxylulose	CC(=O)C(O)C(O)CO	generic	InChI=1S/C5H10O4/c1-3(7)5(9)4(8)2-6/h4-6,8-9H,2H2,1H3	IGUZJYCAXLYZEE-UHFFFAOYSA-N	C5H10O4	Saccharides	Monosaccharides	Carbohydrates	3	5.479		generic_?	KNApSAcK=C00018095,ChEBI=CHEBI:28354,UNPD=UNPD97572,BLEXP=BLEXPDB00009548569,COCONUT=CNP0176641	52.01905:3149 58.97128:13733 65.01404:9327 66.00934:8105 67.35906:21204 67.93072:3144 68.0252:5221 69.03427:16010 71.01363:29560 72.99295:8364 75.00848:14466 79.95733:36699 80.02513:3072 80.96075:4384 80.9651:59447 86.36777:3396 87.00886:6786 87.0452:9543 90.99827:101804 91.13393:3201 92.02553:99110 93.02893:4043 93.3174:3102 94.99313:10569 99.92593:3539 107.03606:281910 108.03955:8453 115.00344:…	[M-H]-	1.634	133.05022	0.9859	0.9872	0.885	1.3219	0.9799	1.0248	1.3	1.3827	0.8351	1.1378	0.7201	0.8837	1.0246	1.1126	1.4343	1.3074	1.5644	1.2147	1.3705	1.3619	0.9876	1.1139	1.3966	0.9442	1.2774	0.6342	0.9958	0.9918
41	1	neg_270	#N/A	??-D-glucosyl-2-coumarinate	OCC1OC(Oc2c(C=CC([O-])=O)cccc2)C(O)C(O)C1O	genus	InChI=1S/C15H18O8/c16-7-10-12(19)13(20)14(21)15(23-10)22-9-4-2-1-3-8(9)5-6-11(17)18/h1-6,10,12-16,19-21H,7H2,(H,17,18)/p-1	GVRIYIMNJGULCZ-UHFFFAOYSA-M	C15H17O8	Phenylpropanoids (C6-C3)	Cinnamic acids and derivatives	Shikimates and Phenylpropanoids	3	6.565		genus_1a	chebi:62223|hmdb:HMDB60077|plantcyc:CPD-7417|kegg compounds:C05839|kegg ligand:C05839|metacyc:CPD-7417|pubchem cid:25796113	61.98775:7437 68.52446:4447 68.52782:6345 69.86897:2661 75.33868:3238 76.57275:2876 79.9576:10666 82.03001:2742 103.93916:3551 119.0498:59368 120.0535:6750 163.03976:52611 163.32468:3050 164.04309:5607 169.34416:3006 170.00391:8977 183.01181:484435 184.01575:49331 185.00792:11667 197.02757:32056 198.03311:5674 199.00732:6078 201.99403:4683 216.0096:25183 221.41753:2969 225.05843:7216 230.02594:54…	[M-H]-	4.34	325.09314	1.7237	1.781	1.7109	3.4202	2.3286	1.667	1.8037	1.8092	2.0974	3.0367	2.4468	2.1085	1.84	1.256	0.6509	0.7778	0.9564	0.6269	2.2823	1.6157	1.5062	2.1275	1.9661	1.1179	0.5073	1.1177	1.4374	1.25
42	1	neg_276	#N/A	Unknown		Unknown	Unknown	Unknown	Unknown	Unknown	Unknown	Unknown	4			?_?	Unknown	57.03382:6983 59.01308:6664 64.48637:6031 65.05284:6429 68.33655:19989 85.02947:36686 95.05033:11156 97.06584:34424 100.29005:5949 102.4799:6409 110.03677:6720 113.33635:5983 125.09689:7811 127.11221:11125 128.20482:5308 135.40901:6180 155.10767:7123 161.23051:5720 165.12762:9421 167.14375:9309 171.10222:58116 177.12842:10336 183.01227:10379 183.13908:35351 184.01599:7487 184.14227:9297 185.00719…	[M-H]-	8.03	327.21777	2.1224	2.2204	2.0297	2.0265	3.2093	2.8752	1.8595	5.1555	1.8562	3.3864	2.247	4.8543	4.0335	1.9956	1.596	0.8751	0.7252	0.9405	1.9665	1.3006	2.0144	2.4499	2.7938	1.7966	1.0333	0.9507	0.9131	1.3472
85	2	neg_279	#N/A	1-O-vanilloyl-??-D-glucose	COc1cc(ccc1O)C(=O)OC2OC(CO)C(O)C(O)C2O	genus	InChI=1S/C14H18O9/c1-21-8-4-6(2-3-7(8)16)13(20)23-14-12(19)11(18)10(17)9(5-15)22-14/h2-4,9-12,14-19H,5H2,1H3	YROOZUQRTLHXIO-UHFFFAOYSA-N	C14H18O9	Phenolic acids (C6-C1)	Simple phenolic acids	Shikimates and Phenylpropanoids	3	5.9103		genus_1a	chebi:71512|plantcyc:CPD-15006|unpd:UNPD174669|cas:68985-14-8|kegg ligand:C20470|metacyc:CPD-15006|pubchem cid:14132344|reaxys registry number:41323	59.01342:1609 61.98793:4354 68.70391:1234 68.70719:1902 71.01365:1814 76.04707:983 79.85159:1062 98.95672:1282 101.02452:1308 108.02145:83464 109.02457:4509 114.9512:1266 122.05727:985 123.04472:46588 124.04834:3354 130.99176:1811 142.94623:1673 152.01112:69284 153.01431:6102 167.03459:214656 168.03796:21419 169.03947:2391 172.88513:1271 184.9337:2101 198.90652:1222 198.93633:3129 267.69415:1135 …	[M-H]-	3.507	329.08807	1.3353	1.2372	1.1771	1.2265	1.2674	1.3581	1.0958	0.719	1.1833	1.3106	1.0346	1.7274	1.1831	1.1965	0.9709	0.8391	0.9625	0.8615	1.6131	1.8713	1.5151	1.6133	1.6751	1.0257	0.6396	1.0615	1.0064	0.8142
43	1	neg_287	#N/A	Unknown		Unknown	Unknown	Unknown	Unknown	Unknown	Unknown	Unknown	4			?_?	Unknown	61.98776:2430 68.10808:2131 68.11172:2229 78.95892:125103 79.20607:1016 96.96011:5653 97.02962:1856 103.91967:986 105.44842:1139 110.98485:105871 118.46712:993 125.03517:212738 126.03885:12032 127.03956:1154 128.0341:1099 151.02596:2355 152.91667:1741 156.93863:1907 160.1494:1257 161.21721:1445 166.97247:1552 176.89789:3888 183.01208:1295 192.90213:3555 204.8936:2162 209.02177:51005 210.02534:297…	[M-H]-	2.939	335.06519	0.3061	0.3005	0.3003	0.6861	0.3166	0.2455	0.5818	0.9218	0.1423	0.3186	0.131	0.4113	0.3382	0.1772	0.2726	0.2472	0.8735	0.3382	0.1513	0.2199	0.0708	0.168	0.1918	0.2477	0.2212	1.0648	0.3871	0.4363
44	1	neg_289	#N/A	Unknown		Unknown	Unknown	Unknown	Unknown	Unknown	Unknown	Unknown	4			?_?	Unknown	55.18169:3681 66.63986:3576 68.09621:5997 68.09992:8200 70.02953:5064 71.01348:7580 74.88053:3576 78.95895:345867 83.04453:3667 84.04547:3614 85.0295:5702 94.98064:3096 96.95999:13053 101.17285:3112 108.04453:4283 110.02415:4856 110.98491:358256 111.01963:531172 111.98835:5092 112.02284:24298 113.02395:9431 119.04947:6271 120.96928:5749 122.33828:3721 125.00037:5861 128.03537:4259 136.03946:5170 …	[M-H]-	1.719	337.04459	3.0726	3.2619	3.0672	7.3948	3.3601	2.762	6.2266	7.1165	2.5582	4.0292	1.3028	7.1091	5.4778	1.4249	2.1527	1.3527	4.3975	1.9454	3.7645	5.5083	1.8543	1.6865	1.8378	1.1282	0.9968	4.0505	2.2987	2.2702
45	1	neg_290	#N/A	Unknown		Unknown	Unknown	Unknown	Unknown	Unknown	Unknown	Unknown	4			?_?	Unknown	61.98777:3175 62.96364:2380 66.03432:2547 67.88418:7677 68.01372:2397 68.99792:2933 70.02941:5244 71.01352:8527 72.10438:1650 75.00837:2880 78.95892:197060 79.9572:2806 83.01407:3503 85.02948:5876 87.00865:2263 96.95998:44523 99.00867:4201 101.02435:2689 102.55627:1820 106.75164:1694 110.98487:178864 111.01957:251615 112.02296:10924 113.02386:11553 113.9953:10399 114.01969:2017 115.00341:5085 119…	[M-H]-	1.15	337.04459	0.7213	0.6639	0.5444	2.3868	1.0306	0.8601	1.7801	2.4075	0.8438	1.0998	0.2829	1.8587	2.4591	0.4515	0.7611	0.4194	1.4371	0.6538	1.1469	1.9551	0.8396	0.4632	0.7775	0.4473	0.4077	1.2822	1.0054	0.8907
46	1	neg_30	#N/A	3-methyl-7-oxabicyclo[4.1.0]hept-3-ene-2,5-dione	CC1=CC(=O)C2OC2C1=O	generic	InChI=1S/C7H6O3/c1-3-2-4(8)6-7(10-6)5(3)9/h2,6-7H,1H3	QMPGHDQKVHABLV-UHFFFAOYSA-N	C7H6O3	Cyclohexenones	Cyclohexenones	Polyketides	3	5.8891		generic_?	COCONUT=CNP0274265	53.42699:2032 58.97164:2548 61.98788:3623 67.04174:14194 74.02087:2116 80.56269:1953 90.11254:2105 92.99384:24212 93.0346:133476 94.0381:15769 97.37957:2883 99.92567:3386 107.93961:1774 111.18418:1921 136.86234:612040 136.89099:57223 136.93936:2549 136.94882:3320 137.02423:13749 137.89137:9519 138.01886:3874 138.85962:107690 138.88971:2541	[M-H]-	4.527	137.02399	0.6726	0.5281	0.5712	0.3321	0.3561	0.2498	0.436	0.6656	0.2968	0.3853	0.2296	0.4203	0.5087	0.3186	0.2386	0.2459	0.304	0.2644	0.9147	0.6272	0.6905	0.7206	0.6483	0.3545	0.3381	0.4766	0.5236	0.3829
428	9	neg_303	#N/A	UNPD105423	CC1=CC(O)C2C34OC4(CCC2(O)C1)C(=O)c5c(cccc5O)C3O	generic	InChI=1S/C19H20O6/c1-9-7-12(21)14-17(24,8-9)5-6-18-16(23)13-10(3-2-4-11(13)20)15(22)19(14,18)25-18/h2-4,7,12,14-15,20-22,24H,5-6,8H2,1H3	NBYHQGUHGIZCKV-UHFFFAOYSA-N	C19H20O6	Polycyclic aromatic polyketides	Angucyclines	Polyketides	3	5.2141		generic_?	UNPD=UNPD105423,COCONUT=CNP0198065	59.01334:1583 61.98789:2568 64.09329:1038 67.2072:6233 68.02503:4108 78.95887:1715 84.95881:992 92.05074:10745 95.06146:9945 106.04076:1299 108.96319:957 111.03089:18452 124.94886:3742 136.04008:10217 137.04366:1051 138.60126:1048 146.98773:1413 148.03987:2730 157.07675:22359 158.08005:3169 163.06172:4306 164.89079:1025 168.93924:7616 170.9877:2251 212.9295:6166 214.09851:2287 220.95641:1623 242.…	[M-H]-	3.89	343.11615	0.6763	0.7686	0.7598	0.5617	0.4387	0.5231	0.492	0.5283	0.4768	0.5684	0.4606	0.564	0.5987	0.9083	0.8381	1.1008	1.2411	1.1327	0.9353	0.9084	0.7637	0.9089	0.843	0.6415	1.2112	0.6423	0.8182	0.7266
47	1	neg_305	#N/A	Unknown		Unknown	Unknown	Unknown	Unknown	Unknown	Unknown	Unknown	4			?_?	Unknown	53.8584:993 60.06308:1211 61.98782:4047 66.00925:6075 67.12764:2309 67.13155:5277 68.70541:1194 78.00939:1845 78.95882:11054 82.04127:1357 90.9238:1188 90.9709:987 91.93159:1456 96.96001:1709 96.96941:2045 103.92019:2530 107.036:14129 108.02001:19243 111.01971:2752 116.75052:1153 120.51336:982 126.03048:5554 126.76971:1075 130.08707:9412 133.01515:162562 134.01888:8719 146.98779:2028 150.04167:40…	[M-H]-	1.754	344.04007	2.2653	2.1892	2.0413	5.6581	9.4129	4.0776	5.1198	2.3574	2.5885	5.7879	10.8542	8.2131	3.0049	1.1135	0.6998	0.8255	0.7103	1.1684	0.092	0.4997	0.0347	0.1285	0.5099	2.0446	0.8147	0.4581	1.0054	1.5179
48	1	neg_306	#N/A	Unknown		Unknown	Unknown	Unknown	Unknown	Unknown	Unknown	Unknown	4			?_?	Unknown	51.76831:1370 56.80519:1428 61.47713:1363 66.00922:8289 66.56042:2276 66.5641:17047 68.95803:1447 69.46239:1312 70.02946:2311 71.01358:3029 72.99267:2345 78.95892:31155 82.04098:2805 88.04057:2728 96.0091:1890 96.96005:1820 96.96927:7110 97.38017:1471 98.02496:1763 99.00906:3142 99.92582:4278 107.03597:28770 108.02004:34540 109.02326:1744 113.03553:2485 113.07169:2295 114.01962:3316 115.00322:308…	[M-H]-	1.152	344.0401	0.3932	0.3046	0.2789	1.2289	2.0051	1.0121	1.1856	0.5496	0.5396	1.343	1.894	1.7115	0.7486	0.23	0.118	0.1864	0.152	0.3676	0.0	0.1172	0.0	0.0159	0.1737	0.5701	0.2147	0.0514	0.274	0.5449
49	1	neg_308	#N/A	Unknown		Unknown	Unknown	Unknown	Unknown	Unknown	Unknown	Unknown	4			?_?	Unknown	57.2354:1125 61.9879:6116 67.52206:1918 67.52589:3130 78.95895:8039 85.0295:3513 86.09618:1180 90.9714:1470 94.99303:1867 96.96041:1303 109.97961:1159 111.00846:3876 114.95145:1222 130.08693:7474 131.09045:3289 131.98795:2355 142.99213:1134 144.00098:1404 145.00836:2228 146.976:1415 146.98708:2727 170.00368:5479 170.98775:4441 171.98239:1470 172.01907:2050 172.05592:2392 175.99005:2985 181.93417:…	[M-H]-	1.718	346.0726	0.8439	0.9893	0.9218	1.3627	1.3354	1.0231	1.1131	0.9121	1.546	1.0789	0.1046	0.7515	1.4593	0.7244	0.2777	0.4396	0.285	0.1896	0.1683	0.1829	0.3208	0.6097	0.2501	0.2747	0.0447	0.3003	0.2504	0.1795
52	1	neg_312	#N/A	7-Hydroxy-14,15,16-trinor-3-clerodene-13,18-dioic acid; Ac	CC1C(CC2(C)C(CCC=C2C(O)=O)C1(C)CCC(O)=O)OC(C)=O	family	InChI=1S/C19H28O6/c1-11-14(25-12(2)20)10-19(4)13(17(23)24)6-5-7-15(19)18(11,3)9-8-16(21)22/h6,11,14-15H,5,7-10H2,1-4H3,(H,21,22)(H,23,24)	IUAWYXROKFKYPG-UHFFFAOYSA-N	C19H28O6	Diterpenoids	Colensane and Clerodane diterpenoids	Terpenoids	3	4.9176		family_1a	dnp:MTV52	54.50708:1852 58.00571:1961 68.70794:3325 68.7112:2247 69.70323:2448 76.8979:1925 79.95727:52899 80.96507:6493 94.98066:6488 95.95242:9639 96.96002:705819 98.95598:6889 122.97543:27888 134.3877:2274 161.09419:2259 183.01184:5932 211.83501:1817 225.2227:6370 271.22794:6079 335.25919:2455 351.18481:61652 351.24948:3257 351.28894:5271 351.32745:2181 352.18979:9949	[M-H]-	12.488	351.18469	0.3232	0.3891	0.4764	0.2088	0.6645	0.5467	0.5874	0.5433	0.122	0.9003	1.4435	1.5161	0.6367	0.1135	0.0291	0.4651	0.1709	0.35	1.513	0.0583	0.2494	2.0946	3.1781	0.6843	0.1002	0.058	0.2924	0.4459
72	2	neg_316	#N/A	2-caffeoylisocitric acid	OC(=O)CC(C(OC(=O)C=Cc1ccc(O)c(O)c1)C(O)=O)C(O)=O	generic	InChI=1S/C15H14O10/c16-9-3-1-7(5-10(9)17)2-4-12(20)25-13(15(23)24)8(14(21)22)6-11(18)19/h1-5,8,13,16-17H,6H2,(H,18,19)(H,21,22)(H,23,24)	KYSQDMNDMYECNZ-UHFFFAOYSA-N	C15H14O10	Phenylpropanoids (C6-C3)	Cinnamic acids and derivatives	Shikimates and Phenylpropanoids	3	6.8071		generic_?	ChEBI=CHEBI:16166;CHEBI:57663,UNPD=UNPD175336;UNPD57825;UNPD226768,COCONUT=CNP0156790	51.02332:1528 52.33708:1058 55.01828:8721 59.01334:1520 61.98782:1616 67.01854:5359 68.71301:2626 69.03425:262289 70.03761:11087 71.01356:13910 72.99301:5276 79.01884:10135 79.95712:2171 80.91516:1160 85.02951:32728 86.03282:1490 95.01388:36979 96.0173:2164 96.96002:19009 97.02939:50646 98.03271:2930 99.00871:69272 100.01218:3864 108.02163:2248 112.93713:1510 113.02409:1241 123.0083:4842 123.0445…	[M-H]-	5.085	353.05151	3.4566	3.5502	3.962	1.7729	0.9001	1.2501	1.6024	1.4052	1.3454	0.7205	2.4413	0.9268	0.727	4.295	4.8009	5.6322	5.3248	5.8787	3.7844	4.7358	4.927	4.9739	5.5002	5.0753	4.8999	4.7684	6.3032	5.021
53	1	neg_317	#N/A	2-O-p-Coumaroylhydroxycitric acid	OC(=O)CC(O)(C(OC(=O)C=Cc1ccc(O)cc1)C(O)=O)C(O)=O	generic	InChI=1S/C15H14O10/c16-9-4-1-8(2-5-9)3-6-11(19)25-12(13(20)21)15(24,14(22)23)7-10(17)18/h1-6,12,16,24H,7H2,(H,17,18)(H,20,21)(H,22,23)	ZHUVVSHTKJAVQB-UHFFFAOYSA-N	C15H14O10	Phenylpropanoids (C6-C3)	Cinnamic acids and derivatives	Shikimates and Phenylpropanoids	3	6.1642		generic_?	HMDB=HMDB0040570,FooDB=FDB020348,UNPD=UNPD39674;UNPD60009;UNPD222632,COCONUT=CNP0120982	51.97667:2969 52.90743:2530 54.67501:2314 57.31818:2603 65.00294:5570 66.72578:21368 67.01866:4744 69.03427:44802 71.01356:13124 72.99274:3043 79.01879:19147 82.55317:2412 85.02958:14522 91.01888:15127 95.01384:17347 95.9519:2863 96.96004:23931 97.02946:58640 97.37395:2944 98.03301:2522 99.00887:7801 108.02147:13028 111.00838:4521 115.00327:3300 123.00847:6780 123.04476:57489 124.01626:4008 124.0…	[M-H]-	3.627	353.05154	1.1299	1.1804	1.1979	0.6755	0.2813	0.3606	0.4112	0.4775	0.3908	0.2119	0.2243	0.2484	0.2021	1.5246	2.0366	1.9435	1.7044	1.8473	1.4195	1.6907	1.5233	1.5507	1.6384	1.5606	1.6554	1.2672	1.5521	1.7167
54	1	neg_318	#N/A	Unknown		Unknown	Unknown	Unknown	Unknown	Unknown	Unknown	Unknown	4			?_?	Unknown	57.03405:4760 58.00544:5859 59.01336:12351 61.98771:1338 67.28159:2653 67.28551:6446 70.74103:1151 71.01357:11157 72.99287:8866 79.95721:3404 85.0295:20900 87.00896:1522 89.02446:3025 96.96001:18786 97.02963:1574 98.95583:1365 101.02418:4940 108.02131:6469 119.04977:2128 131.06104:4014 132.03185:2264 145.45253:1285 146.04808:20893 147.03061:3359 147.05606:126354 148.05951:11579 152.01096:5848 153…	[M-H]-	3.824	353.09906	0.6143	0.6387	0.6561	0.1632	0.1056	0.1602	0.1467	0.133	0.147	0.1345	0.1234	0.1995	0.1919	0.4164	0.4053	0.5031	0.4258	0.4474	0.4672	0.4231	0.4239	0.4172	0.4435	0.7759	1.2486	0.8114	1.0393	0.7833
55	1	neg_322	#N/A	Caffeic acid 3-O-glucuronide	OC1C(Oc2cc(C=CC(O)=O)ccc2O)OC(C(O)C1O)C(O)=O	generic	InChI=1S/C15H16O10/c16-7-3-1-6(2-4-9(17)18)5-8(7)24-15-12(21)10(19)11(20)13(25-15)14(22)23/h1-5,10-13,15-16,19-21H,(H,17,18)(H,22,23)	BSOMSDFTZKNUHY-UHFFFAOYSA-N	C15H16O10	Phenylpropanoids (C6-C3)	Cinnamic acids and derivatives	Shikimates and Phenylpropanoids	3	6.7264		generic_?	HMDB=HMDB0041705;HMDB0124958;HMDB0127960,FooDB=FDB029870;FDB031328,Urine=HMDB0041705,Serum=HMDB0041705,BLEXP=BLEXPDB00025171992,COCONUT=CNP0182215	57.03403:16967 59.01339:3325 66.82879:11118 71.01361:7824 72.99286:2140 74.96984:1540 82.59628:1805 83.01377:3972 84.02172:6677 85.02948:114723 86.03306:4715 87.67143:1639 87.8849:1536 88.12971:1497 97.37767:3426 99.00887:1484 103.0038:1622 108.02174:3012 109.18215:1657 111.00857:3132 119.04958:3357 119.41925:1603 129.01913:8253 129.26416:1681 133.01384:1808 137.02591:1915 147.02937:15148 147.102…	[M-H]-	4.058	355.06717	1.5325	1.6868	2.0696	0.7142	0.2434	0.4815	0.3106	0.3712	0.3409	0.2634	1.6381	0.3014	0.2909	1.4506	1.5842	1.9754	2.7426	2.108	2.7938	1.8803	3.0568	2.5508	3.2106	2.3845	1.9997	2.0303	2.9681	2.6746
86	2	neg_323	#N/A	(2Z)-3-(3-methoxy-4-{[(2S,3R,4S,5S,6R)-3,4,5-trihydroxy-6-(hydroxymethyl)oxan-2-yl]oxy}phenyl)prop-2-enoic acid	COc1cc(C=CC(O)=O)ccc1OC2OC(CO)C(O)C(O)C2O	family	InChI=1S/C16H20O9/c1-23-10-6-8(3-5-12(18)19)2-4-9(10)24-16-15(22)14(21)13(20)11(7-17)25-16/h2-6,11,13-17,20-22H,7H2,1H3,(H,18,19)	IEMIRSXOYFWPFD-UHFFFAOYSA-N	C16H20O9	Phenylpropanoids (C6-C3)	Cinnamic acids and derivatives	Shikimates and Phenylpropanoids	3	6.7704		family_1a	knapsack:C00037143|cas:94942-20-8	57.03404:2786 59.01309:1444 59.09974:918 61.98805:2286 66.71183:1216 66.71552:10759 67.70368:1068 71.0135:1971 71.69669:1032 85.0295:20498 87.0089:1514 102.99773:994 106.04191:1072 108.02141:2661 121.02907:3215 129.01889:1210 133.02901:3929 134.03697:114409 135.04031:10264 137.02402:16951 138.02759:1438 139.03995:5856 144.0773:1423 147.02942:1587 149.06039:32544 150.03226:2114 150.06387:3506 152.…	[M-H]-	4.597	355.10358	2.6883	2.4621	2.352	3.7766	2.6362	2.9374	2.6895	2.5793	2.7616	4.1127	3.1654	3.9751	3.2165	3.0032	2.033	2.1548	2.51	1.7687	3.2972	2.7914	2.1764	3.9347	3.4861	1.7539	1.7349	1.748	1.9537	2.0011
57	1	neg_327	#N/A	Unknown		Unknown	Unknown	Unknown	Unknown	Unknown	Unknown	Unknown	4			?_?	Unknown	53.80455:1168 61.40732:1024 61.98796:2023 63.17091:1269 67.04762:7813 71.01338:2990 76.61593:1061 78.95889:6386 78.99796:1259 83.01377:1634 87.00325:8953 94.99322:1745 96.96014:1930 97.37352:1272 101.01868:22225 101.02493:2003 102.99806:8247 103.91995:3700 104.17605:1096 104.92792:2263 106.99288:2787 110.98527:1508 111.01953:7554 113.01833:19040 113.0253:1972 115.03383:1772 117.0136:1009 118.9926…	[M-H]-	1.746	359.0314	0.629	0.678	0.7195	1.5623	1.5181	1.3764	2.1515	3.3777	0.9489	1.2104	0.0794	2.7889	1.423	0.6033	0.85	0.8246	0.8115	0.8954	1.1796	1.6562	1.4299	0.8015	1.5147	0.4724	0.4912	0.5205	0.4945	0.8351
59	1	neg_33	#N/A	ketopantoic acid	CC(C)(CO)C(=O)C([O-])=O	genus	InChI=1S/C6H10O4/c1-6(2,3-7)4(8)5(9)10/h7H,3H2,1-2H3,(H,9,10)/p-1	PKVVTUWHANFMQC-UHFFFAOYSA-M	C6H9O4	Short-chain keto acids and derivatives	Short-chain keto acids and derivatives	Unknown	3	5.6956		genus_1a	chebi:11561|plantcyc:2-DEHYDROPANTOATE|bigg:2dhp|chemspider:14649571|drugbank:DB03795|kegg compounds:C00966|kegg ligand:C00966|metacyc:2-DEHYDROPANTOATE|pubchem cid:16755619	52.10262:1419 53.14728:1597 56.1056:1488 61.98791:67833 67.96004:1781 67.96328:5679 78.22713:1588 80.7601:1475 81.03484:1800 83.05015:16104 87.92546:2184 90.97173:3805 96.31195:1448 101.06052:19119 118.96587:22320 131.85568:1450 144.86578:36039 144.89702:3284 145.04988:4358 145.86186:17986 145.89886:2638 146.86296:46576 146.89796:7076 146.98712:1737	[M-H]-	3.681	145.05025	0.317	0.2516	0.2883	0.3374	0.7824	0.2226	0.3582	0.3606	0.6436	0.3763	0.3624	0.5208	1.5077	0.1665	0.2264	0.2126	0.1522	0.3323	0.1837	0.1892	0.1734	0.274	0.4475	0.1235	0.2693	0.1661	0.2496	0.1803
60	1	neg_331	#N/A	Unknown		Unknown	Unknown	Unknown	Unknown	Unknown	Unknown	Unknown	4			?_?	Unknown	50.9892:1289 54.0034:1195 55.01849:1411 57.03415:9743 57.64041:1234 59.01327:5528 65.03925:4286 68.52442:3239 68.52769:1422 68.70962:1406 71.33371:1470 72.89395:1316 77.99229:1419 79.95707:2000 83.05026:12480 85.0298:1451 87.00885:11772 92.91351:1341 95.05036:4493 96.73292:1254 96.96004:122365 98.03757:1497 98.95599:4423 109.06551:1394 111.04491:4674 111.08108:3428 121.06551:5881 123.07284:1684 1…	[M-H]-	4.485	361.09656	0.613	0.5968	0.608	1.0899	0.569	0.71	0.7116	0.7769	0.8425	0.9461	0.7035	1.3981	1.1959	0.888	0.4375	0.6768	0.6692	0.6426	0.6552	0.5308	0.5754	0.6129	0.5478	0.3723	0.7421	0.1947	0.4028	0.2732
61	1	neg_336	#N/A	(1S,2R,6R,9S,11S)-2-hydroxy-9,11,14,14-tetramethyl-6-phenyl-7,12-dioxatetracyclo[7.4.1.0?,??.0?,?]tetradec-3(8)-ene-4,10-dione	CC12OCC3C2(O)C4=C(OC(CC4=O)c5ccccc5)C(C)(C1=O)C3(C)C	family	InChI=1S/C22H24O5/c1-19(2)15-11-26-21(4)18(24)20(19,3)17-16(22(15,21)25)13(23)10-14(27-17)12-8-6-5-7-9-12/h5-9,14-15,25H,10-11H2,1-4H3	NZANVYUIDHOMEY-UHFFFAOYSA-N	C22H24O5	Unknown	Unknown	Shikimates and Phenylpropanoids|Terpenoids	3	5.1008		family_1a	knapsack:C00008372|cas:75801-77--3	58.54853:1441 61.98785:3073 79.90045:1238 79.95716:10439 82.43833:1415 92.63171:1363 96.96003:734146 97.95939:5069 98.94957:1122 98.95587:26677 98.96394:4097 99.15851:1277 100.33675:1286 118.19016:1264 124.56632:1439 129.47592:1550 140.56235:1341 182.96725:6539 183.01208:2428 194.96753:1541 227.09068:1417 228.22806:1446 232.94899:2735 238.95583:6546 240.94095:2741 242.93329:1649 262.17615:1593 28…	[M-H]-	8.382	367.1582	0.0761	0.0609	0.0639	0.0	4.2961	0.116	0.0	0.0	0.0	0.0	0.0	0.0	0.0	0.0	0.0	0.0	0.0	0.0	0.0	0.0	0.0	0.0	0.0	0.0	0.0	0.0	0.0	0.0
62	1	neg_338	#N/A	Isoferuloyl C1-glucuronide	COc1ccc(C=CC(=O)OC2OC(C(O)C(O)C2O)C(O)=O)cc1O	generic	InChI=1S/C16H18O10/c1-24-9-4-2-7(6-8(9)17)3-5-10(18)25-16-13(21)11(19)12(20)14(26-16)15(22)23/h2-6,11-14,16-17,19-21H,1H3,(H,22,23)	RBJXXYNRHTWXDN-UHFFFAOYSA-N	C16H18O10	Phenylpropanoids (C6-C3)	Cinnamic acids and derivatives	Shikimates and Phenylpropanoids	3	6.5917		generic_?	HMDB=HMDB0041749,FooDB=FDB029919,Urine=HMDB0041749,Serum=HMDB0041749,COCONUT=CNP0021838	55.01835:3441 57.03404:14166 57.54067:1011 58.03729:1114 59.01324:2777 60.27592:989 65.50058:1478 67.42014:4700 67.42406:2437 69.03429:2709 70.15167:1012 71.01354:16162 71.01717:1957 72.99287:4019 73.0293:3268 75.00867:2365 81.03464:2083 83.01386:9211 84.02164:2607 85.02951:74305 86.03285:2957 87.00901:1113 95.01378:1121 96.96047:1041 97.02925:10837 99.00859:3882 99.04485:8160 101.02425:4599 102.…	[M-H]-	4.49	369.08267	0.4937	0.5883	0.6748	0.2971	0.0773	0.1854	0.1535	0.1523	0.1452	0.1074	0.481	0.1197	0.1299	0.5215	0.3902	0.6118	0.8932	0.6182	0.9442	0.6208	1.4044	0.9332	1.1117	1.0043	0.718	0.4097	0.7152	0.6265
63	1	neg_339	#N/A	Ferulic acid 4-O-glucuronide	COc1cc(C=CC(O)=O)ccc1OC2OC(C(O)C(O)C2O)C(O)=O	generic	InChI=1S/C16H18O10/c1-24-9-6-7(3-5-10(17)18)2-4-8(9)25-16-13(21)11(19)12(20)14(26-16)15(22)23/h2-6,11-14,16,19-21H,1H3,(H,17,18)(H,22,23)	TWSIWBHKRJLZCF-UHFFFAOYSA-N	C16H18O10	Phenylpropanoids (C6-C3)	Cinnamic acids and derivatives	Shikimates and Phenylpropanoids	3	6.092		generic_?	HMDB=HMDB0041733;HMDB0127953;HMDB0133307,FooDB=FDB029899;FDB031330,Urine=HMDB0041733,Serum=HMDB0041733,COCONUT=CNP0040512	53.62864:1080 55.01823:1390 57.03405:7876 59.01345:1467 62.04426:946 68.71089:2441 68.71445:1613 68.94011:969 70.10997:961 71.01359:3618 74.02468:1136 83.01383:3997 84.02148:1573 85.0295:44328 86.03293:2401 87.5146:985 91.882:923 101.02415:3175 109.10687:1140 111.00842:11705 119.04987:3253 129.01884:19331 154.9716:1432 163.03955:3645 182.96661:5380 183.0127:1518 184.96144:1009 194.96652:2056 205.…	[M-H]-	4.638	369.08267	0.7627	0.8322	0.8934	0.6532	0.2094	0.3352	0.2767	0.3057	0.34	0.228	0.9859	0.3337	0.3013	0.8622	0.5581	0.7446	1.069	0.7529	1.2526	0.9199	1.5953	1.4288	1.3098	0.9793	0.9943	0.4769	0.7529	0.7256
64	1	neg_346	#N/A	Unknown		Unknown	Unknown	Unknown	Unknown	Unknown	Unknown	Unknown	4			?_?	Unknown	66.00931:6117 66.75013:1043 67.81483:2651 67.81851:2346 69.53336:1041 71.01369:5986 73.02925:2808 77.76532:980 78.95891:54824 82.04111:1888 93.0341:1126 94.16106:1178 95.56329:1236 96.96001:1426 101.02446:1260 107.03607:13951 108.02009:20030 110.98488:38142 111.98818:1593 113.02425:1282 118.88153:984 121.01462:1176 126.03056:7655 128.03423:1114 131.03487:2680 131.04393:1079 133.01517:186919 134.0…	[M-H]-	2.662	376.06641	0.6092	0.5798	0.569	1.9445	2.4044	1.4907	1.8327	0.3888	0.9483	2.0569	1.4212	1.056	1.3804	0.2633	0.0693	0.1047	0.1249	0.2542	0.192	0.1935	0.2337	0.8361	0.8388	0.3825	0.0816	0.0236	0.0902	0.1537
65	1	neg_355	#N/A	Unknown		Unknown	Unknown	Unknown	Unknown	Unknown	Unknown	Unknown	4			?_?	Unknown	56.7755:1585 58.00544:4565 59.0107:2152 59.01334:23411 61.98784:3822 64.18874:1803 64.82212:1879 68.70482:4054 71.01357:110966 71.04995:10226 72.01684:4356 72.99278:7193 73.02934:2927 78.53895:1613 83.01414:3210 85.02939:7118 87.00892:4350 88.04055:11461 89.02445:20548 93.98493:2021 95.01403:3022 96.95991:3973 99.04498:5541 101.02429:20124 107.03593:1906 113.02408:10576 115.00339:19089 116.03471:…	[M-H]-	3.353	380.15637	0.575	0.5525	0.5792	0.4764	0.3444	0.4012	0.3629	0.3738	0.3889	0.405	0.3431	0.4997	0.4758	0.7132	0.5117	0.5649	0.6048	0.5897	0.612	0.635	0.703	0.8333	0.6424	0.5057	0.6495	0.2965	0.4342	0.5072
304	2	neg_36	#N/A	(R)-2-hydroxyglutarate	OC(CCC([O-])=O)C([O-])=O	family	InChI=1S/C5H8O5/c6-3(5(9)10)1-2-4(7)8/h3,6H,1-2H2,(H,7,8)(H,9,10)/p-2	HWXBTNAVRSUOJR-UHFFFAOYSA-L	C5H6O5	Short-chain hydroxy acids and derivatives	Short-chain hydroxy acids and derivatives	Unknown	3	6.4936		family_1a	chebi:15801|hmdb:HMDB00606|plantcyc:R-2-HYDROXYGLUTARATE|cas:13095-47-1|chemspider:4573827|kegg ligand:C01087|metabolights:MTBLC15801|metacyc:R-2-HYDROXYGLUTARATE|pubchem cid:5460200	57.03402:7676 59.01328:3280 60.70121:1425 61.9879:7892 66.98328:9946 75.95911:1290 85.02947:24891 87.00879:36951 87.18575:1205 88.01192:2325 103.03984:3757 103.55585:1456 118.96575:6874 129.01897:4209 146.8989:6579 147.02937:11126 148.90067:6453 148.96637:1506	[M-H]-	1.768	147.02953	0.5524	0.5322	0.518	0.6402	0.6275	0.6126	0.6322	0.5394	0.5359	0.8286	1.5529	0.4399	1.0042	0.2964	0.2587	0.2105	0.2699	0.24	0.3942	0.3594	0.3936	0.4319	0.3834	0.3551	0.2688	0.4315	0.4582	0.351
66	1	neg_360	#N/A	2,3-Butanediol apiosylglucoside	CC(O)C(C)OC1OC(COC2OCC(O)(CO)C2O)C(O)C(O)C1O	generic	InChI=1S/C15H28O11/c1-6(17)7(2)25-13-11(20)10(19)9(18)8(26-13)3-23-14-12(21)15(22,4-16)5-24-14/h6-14,16-22H,3-5H2,1-2H3	IXOASERJLNPXSS-UHFFFAOYSA-N	C15H28O11	O-glycosyl compounds	O-glycosyl compounds	Unknown	3	6.3692		generic_?	HMDB=HMDB0033063,FooDB=FDB011056,UNPD=UNPD30933,COCONUT=CNP0395253	55.01826:3602 57.03388:4866 58.00538:4081 59.01327:20605 61.98779:2849 63.87589:1264 68.48536:1936 68.48844:2497 71.01355:79232 72.01687:3677 72.99277:7663 73.02924:22064 75.00854:3116 83.01385:9173 85.02445:2324 85.02946:34681 87.00881:4258 89.02445:20468 90.0279:1333 95.01382:7663 97.02949:1986 99.00873:23280 101.02425:54192 102.02731:2051 107.88993:1438 110.90755:1275 111.008:2262 113.02409:29…	[M-H]-	3.115	383.15619	1.9076	1.8173	1.8658	2.0972	1.5119	2.3854	2.1827	2.0606	2.0793	2.6325	1.9603	1.7944	2.6552	1.7085	1.8236	2.1485	2.3583	2.5677	2.1257	2.0566	1.5859	1.9678	2.209	0.9304	2.3473	0.68	1.3449	1.3076
67	1	neg_363	#N/A	3,4,5-trihydroxy-6-{[2-hydroxy-3-(3-hydroxy-4-methoxyphenyl)propanoyl]oxy}oxane-2-carboxylic acid	COc1ccc(CC(O)C(=O)OC2OC(C(O)C(O)C2O)C(O)=O)cc1O	generic	InChI=1S/C16H20O11/c1-25-9-3-2-6(4-7(9)17)5-8(18)15(24)27-16-12(21)10(19)11(20)13(26-16)14(22)23/h2-4,8,10-13,16-21H,5H2,1H3,(H,22,23)	FBWXKAYOMMTKJC-UHFFFAOYSA-N	C16H20O11	O-glucuronides	O-glucuronides	Shikimates and Phenylpropanoids	3	6.3799		generic_?	HMDB=HMDB0127842	50.14567:1419 54.20721:1282 57.03399:3371 58.00528:2984 59.01071:1387 59.01332:11683 61.98785:1807 66.48999:1319 67.01858:2439 67.97474:5066 68.99767:4476 69.03395:3330 71.00997:2390 71.01353:32206 72.99281:11561 75.00465:1624 75.00853:26039 77.01074:1347 81.03456:1356 83.89771:1707 85.02473:1805 85.02947:33629 85.21637:1337 86.0327:2716 87.00883:15787 89.02457:7430 91.04025:1694 93.03456:70037 9…	[M-H]-	4.12	387.09344	0.5546	0.49	0.5277	0.1577	0.128	0.1675	0.1511	0.2094	0.1626	0.2449	0.1462	0.2001	0.2047	0.3596	0.2132	0.2761	0.3245	0.2513	0.2857	0.3605	0.3673	0.4689	0.3372	0.538	0.4882	0.4775	0.4871	0.5216
68	1	neg_365	#N/A	2-[(1R,2S)-3-oxo-2-[(2Z)-5-{[(2R,3R,4S,5S,6R)-3,4,5-trihydroxy-6-(hydroxymethyl)oxan-2-yl]oxy}pent-2-en-1-yl]cyclopentyl]acetate	OCC1OC(OCCC=CCC2C(CC([O-])=O)CCC2=O)C(O)C(O)C1O	genus	InChI=1S/C18H28O9/c19-9-13-15(23)16(24)17(25)18(27-13)26-7-3-1-2-4-11-10(8-14(21)22)5-6-12(11)20/h1-2,10-11,13,15-19,23-25H,3-9H2,(H,21,22)/p-1	JFDNMLUPLXZXGV-UHFFFAOYSA-M	C18H27O9	Fatty acyl glycosides	Fatty acyl glycosides of mono- and disaccharides	Fatty acids	3	6.3053		genus_1a	plantcyc:CPD-19813|pubchem cid:126961216	51.99413:1076 56.095:991 56.59331:992 57.03434:1095 58.00555:5096 59.01335:117674 60.01685:1930 61.98791:2146 66.78783:2032 66.79161:8657 71.00985:2003 71.01359:30031 72.99287:8469 73.02911:1207 75.00859:1217 83.01408:1155 85.02945:7191 87.00887:3068 89.02452:20496 91.16619:1023 95.01378:2537 99.00866:1099 101.02423:22087 113.02405:8448 119.03452:8745 142.71072:1169 152.91714:3232 161.23889:1810 …	[M-H]-	4.726	387.16623	0.9399	0.8467	0.7983	2.2768	1.6888	1.5367	1.9156	1.5112	1.58	1.8965	1.6406	3.0718	2.1717	1.0733	0.6602	0.5699	0.8711	0.7335	0.6567	0.6344	0.7692	0.8558	0.7974	0.223	0.5303	0.1113	0.2236	0.1745
[truncated: 365 more rows]
[truncated: 8 more columns]

## Sheet: Supplementary Material 3
Supplementary Material 3: Metagenomic analysis of control (n = 7) and inoculated treatment(n = 7) at 150mg/ml of P. oligandrum mycelium on seedlings of M. truncatula (F83005.5 accession). Plants were uprooted at 56 dpi and rhizoshpere were separated.The extracted metagenomes were amplified by PCR and sequenced using Illumina MiSeq with 250 bp paired-end reads. The bacterial community, the V3-V4 r…
ID	C1-F83	C2-F83	C3-F83	C4-F83	C5-F83	C6-F83	C7-F83	P1-F83	P2-F83	P3-F83	P4-F83	P5-F83	P6-F83	P7-F83	total_ASV	Kingdom	Phylum	Class	Order	Family	Genus	Species
ASV1	0	0	0	0	0	0	0	0	0	0	0	0	0	13	13	Bacteria	Bacteroidota	Bacteroidia	Chitinophagales	Chitinophagaceae	Parafilimonas	Parafilimonas_rhizosphaerae
ASV2	0	0	0	0	0	10	0	0	0	0	0	0	0	0	10	Bacteria	Bacteroidota	Bacteroidia	Chitinophagales	Chitinophagaceae	Parafilimonas	Parafilimonas_rhizosphaerae
ASV3	0	0	8	0	0	0	0	0	0	0	0	0	0	0	8	Bacteria	Bacteroidota	Bacteroidia	Chitinophagales	Chitinophagaceae	Ferruginibacter	NA
[truncated: 1,410 more rows]

## Sheet: Supplementary Material 4
Supplementary Material 4: Metagenomic analysis of control (n = 7) and inoculated treatment (n = 7) at 150mg/ml of P. oligandrum mycelium on seedlings of M. truncatula (F83005.5 accession). Plants were uprooted at 56 dpi and rhizoshpere were separated.The extracted metagenomes were amplified by PCR and sequenced using Illumina MiSeq with 250 bp paired-end reads. For the fungal community, the ITS2 …
[truncated: 375 more rows]

[truncated: 2 more sheets: Supplementary Material 5, Supplementary Material 6]
